# Supplementary material for: Pathogenomes of Shiga Toxin Positive and Negative Escherichia coli O157:H7 Strains TT12A and TT12B: Comprehensive Phylogenomic Analysis Using Closed Genomes
Source: Microorganisms. 2024 Mar 29;12(4):699. doi: 10.3390/microorganisms12040699 (PMC11052207; doi:10.3390/microorganisms12040699)
Supplement: Supplementary file 1 [file microorganisms-12-00699-s001.zip]

Archive with 5 entries (5 files):
- Supplemental_Figures.pdf
- Supplemental_Tables/ST_1_Strain_associated_metadata.xlsx
- Supplemental_Tables/ST_2_Primers_used_in_this_study.xlsx
- Supplemental_Tables/ST_3_Genome_features_and_contents.xlsx
- Supplemental_Tables/ST_4_Core_genome_SNP_and_MLST_loci.xlsx
