# Supplementary material for: Pathogenomes of Shiga Toxin Positive and Negative Escherichia coli O157:H7 Strains TT12A and TT12B: Comprehensive Phylogenomic Analysis Using Closed Genomes
Source: Microorganisms. 2024 Mar 29;12(4):699. doi: 10.3390/microorganisms12040699 (PMC11052207; doi:10.3390/microorganisms12040699)
Supplement: Supplementary file 1 [file microorganisms-12-00699-s001.zip › Supplemental_Tables/ST_1_Strain_associated_metadata.xlsx]

## Sheet: ST1-1 Strain metadata
Strain	Serotype	Clade	ST Achtman	Stx-status	Source	Origin	Year	Sequencing Technology	Assembly level	Contigs [n]	BioSample Accession	Closed or Draft Genome [bp]	Plasmid(s) [bp]	Plasmid Type	Genbank Chromosome/Draft Accession	Plasmid Accession	SRA Accession	References
Sakai	O157:H7	1.1	11	+	Human	Sakai City, Japan	1996	PacBio, Illumina	Closed	1+2	SAMN01911278	5944605	92721; 3,306	pO157; pOSAK1	BA000007.3	AB011549; AB011548	DRX189221	Hayashi et al., 2001 (PMID: 11258796)
PA11	O157:H7	2.9	11	+	Human	Pennsylvania, US	2007	Illumina	Draft	121	SAMN01112590	5158962	N/A	N/A	AOEI00000000	N/A	SRR537043	Unpublished
TT12A	O157:H7	3.12	11	+	Human (fecal)	Yokosuka Japan	1994	PacBio, Illumina	Closed	1+1	SAMN11310480	5.501.009	92710	pO157	CP038496	CP038497	SRR12179674	Feng et al. 2001 (PMID: 11427416), This study
TT12B	O157:H7	3.12	11	-	Human (fecal)	Yokosuka, Japan	1994	PacBio, Illumina	Closed	1+1	SAMN11310481	5335866	92707	pO157	CP038494	CP038495	SRR427084	Feng et al. 2001 (PMID: 11427416), Nyong et al. 2020 (PMID: 32351476)
EDL933	O157:H7	3.12	11	+	Ground beef	Michigan, US	1982	PacBio, Illumina	Closed	1+1	SAMN02905113	5528445	92077	pO157	CP008957	CP008958	SRR1509643	Perna et al. 2001 (PMID: 11206551), Latif et al. 2014 (PMID: 25125650)
TW11039	O157:H7	4.2	11	+	Human	Michigan, US	2002	Illumina, 454	Draft	71	SAMN02435981	5596176	N/A	pO157	AKLW00000000	N/A	SRR393960	Eppinger et al., 2013 (PMID: 23516226)
PA22	O157:H7	5.23	11	+	Human	Pennsylvania, US	2007	Illumina, 454	Draft	75	SAMN02435925	5494508	N/A	N/A	AKLI00000000	N/A	SRR396680	Unpublished
EC1738	O157:H7	6.29	11	+	Human	Massachusetts, US	2009	Illumina, 454	Draft	62	SAMN02435976	5478162	N/A	pO157	AKMN00000000	N/A	SRR394631	Eppinger et al., 2013 (PMID: 23516226)
PA40	O157:H7	7.29	11	+	Human	Pennsylvania, US	2008	Illumina, 454	Draft	66	SAMN00760005	5525229	N/A	N/A	AKLQ00000000	N/A	SRR371533	Unpublished
EC4115	O157:H7	8.3	11	+	Human	Maine, US	2006	Sanger, 454	Closed	1+2	SAMN02603441	5572075	94,644; 37,452	pO157; pEC4115	CP001164	CP001163; CP001165	N/A	Eppinger et al., 2011 (PMID: 22135463)
PA48	O157:H7	9.1.35	11	+	Human	Pennsylvania, US	2008	Illumina	Draft	136	SAMN01112511	5196577	N/A	N/A	AOEN00000000	N/A	SRR537020	Unpublished
