# Supplementary material for: Pathogenomes of Shiga Toxin Positive and Negative Escherichia coli O157:H7 Strains TT12A and TT12B: Comprehensive Phylogenomic Analysis Using Closed Genomes
Source: Microorganisms. 2024 Mar 29;12(4):699. doi: 10.3390/microorganisms12040699 (PMC11052207; doi:10.3390/microorganisms12040699)
Supplement: Supplementary file 1 [file microorganisms-12-00699-s001.zip › Supplemental_Tables/ST_2_Primers_used_in_this_study.xlsx]

## Sheet: ST-2 Primers
Primer	Sequence (5’ - 3’)	Target Locus	Amplicon Size [bp]	Primer sequence reference
recA-F	ACCTTCGCCGTAGAGGATCT	recA (TT12A/B)	143	This study
recA-R	CTGTTCGTCTCGACATCCGT
stx1-F	ATAAATCGCCATTCGTTGACTAC	stx1 (TT12A)	180	Rajkhowa et al., 2010 (PMID: 21176142)
stx1-R	AGAACGCCCACTGAGATCATC
stx2-F	GGCACTGTCTGAAACTGCTCC	stx2 (TT12A)	255	Rajkhowa et al., 2010 (PMID: 21176142)
stx2-R	TCGCCAGTTATCTGACATTCTG
tufA-F	TGGTTGATGACGAAGAGCTG	TT12A/B	195	Gobert et al., 2007 (PMID: 17548655)
tufA-R	GCTCTGGTTCCGGAATGTAA
PP2-5’-F	GAGCCGCAAGAATCCGTTTG	TT12A/B-PP2 inversion anchor (A: 1,045,514-1,045,553)	--	This study
TT12A-PP2-5'-R	GATACCGTGTCGCTGGTTGA	TT12A-PP2 inversion start (1,045,899-1,045,918)	504	This study
TT12B-PP2-5'-R	AAGTTTGTAGCTGCCTGCCA	TT12B-PP2 inversion start (1,045,828-1,045,847)	336	This study
PP2-3'-R	GGCCCCCATCACATGAAAGA	TT12A/B-PP2 inversion anchor (A: 1,047,815-1,047,834)	--	This study
TT12A-PP2-3'-F	GAATTTCGCGCCGTTGAACT	TT12A-PP2 end (1,047,314-1,047,333)	521	This study
TT12B-PP2-3'-F	GAGGCCATGTCCGGTATCTG	TT12B-PP2 end (1,047,370-1,047,389)	463	This study
TT12A-PP10 nleL-F	GTAAGGGCCGCTGAAGAACT	nleL (TT12A)	331	This study
TT12A-PP10 nleL-R	GTTCCTGCATTCCATCACGC			This study
