# Supplementary material for: Pathogenomes of Shiga Toxin Positive and Negative Escherichia coli O157:H7 Strains TT12A and TT12B: Comprehensive Phylogenomic Analysis Using Closed Genomes
Source: Microorganisms. 2024 Mar 29;12(4):699. doi: 10.3390/microorganisms12040699 (PMC11052207; doi:10.3390/microorganisms12040699)
Supplement: Supplementary file 1 [file microorganisms-12-00699-s001.zip › Supplemental_Tables/ST_3_Genome_features_and_contents.xlsx]

## Sheet: ST-3-1 Phages
I. Prophage inventory of TT12A and TT12B
Summary: 20 shared prophage regions have been identified in TT12A and TT12B including 11 intact, 4 incomplete, and 5 questionable regions. The three additional intact TT12A-specific phages are highlighted in yellow.
TT12A	TT12B	Length [kb]	Completeness	Specific features	TT12A position	TT12B position	Strain-specific phages/variants	Stx-prophage Replicase	Stx-prophage Eru	tRNA (n)	Protein (n)	Phage-like Protein (n)	Hypothetical Protein (n)	Phage-like + hypothetical protein percentage	Bacterial protein (n)	att sites	att sequence
PP1	PP1	16.6Kb	incomplete(50)	integrase,tail,transposase	589228-605841	589227-605839				0	16	8	2	0.625	6	yes	GGTTCGAGTCCGGCCTTCGGCACCAA
PP2	PP2	26.5Kb	questionable(90)	integrase,tail,plate,transposase	1031824-1058327	1031822-1058325	Inversion of 1850 bp			0	17	17	0	1	0	yes	CTGATTTTTATA
PP3	PP3	38.5Kb	intact(150)	integrase,lysin,terminase,portal,protease,tail	1631410-1669996	1631408-1669994				0	54	46	4	0.925	4	yes	GCTTTTTTATACTAA
PP4	PP4	26.6Kb	incomplete(30)	protease,tail	1900112-1926718	1900109-1926715				0	29	18	3	0.724	8	yes	AAGAAAAACAAA
PP5	PP5	28.9Kb	intact(140)	transposase,tail,head,capsid	1920459-1949425	1920456-1949423				0	32	30	2	1	0	no	-
PP6-Stx2a	-	63.2Kb	intact(150)	integrase,lysin,tail,capsid,terminase,head	1986448-2049697	-	TT12A-specific	-	2	3	94	93	0	0.989	1	yes	CATCGTTTCAACAT
PP7	PP6	29.2Kb	questionable(80)	integrase,transposase,tail	2111239-2140519	2048005-2077285				0	15	10	3	0.866	2	yes	GAAGTGACCAGA
PP8	PP7	9.9Kb	questionable(70)	transposase,tail	2142143-2152069	2078909-2088835				0	12	9	1	0.833	2	no
PP9	PP8	10.2Kb	incomplete(40)	transposase,tail	2172874-2183128	2109640-2119894				0	8	6	1	0.875	1	yes	TTTCCTGGAGAGTGTTTTATCTGTGAA
PP10-BP-4795	-	49Kb	intact(150)	integrase,tail,lysin,terminase,head,portal	2281924-2330996	-	TT12A-specific			0	65	55	5	0.923	5	yes	GCTGGCACCGAGAT
PP11	PP9	17.4Kb	questionable(80)	integrase,capsid,head,portal,terminase	2335520-2352986	2220031-2241481				0	25	15	7	0.88	3	yes	CGGTGTAGTTAATGGTGTAGT
PP12	PP10	50.9Kb	intact(110)	integrase,lysin,tail	2356366-2407337	2244861-2295833				0	47	43	1	0.936	3	yes	GATCATCAAGAA
PP13	PP11	111.6Kb	intact(150)	integrase,tail,lysin,terminase,head,portal,transposase,capsid	2498361-2609983	2386857-2498474				4	132	113	6	0.901	13	yes	GAGTTGCGAAAAA
PP14	PP12	60Kb	intact(150)	tail,head,portal,terminase,lysin,integrase	2770452-2830541	2658944-2719034				2	67	58	4	0.925	5	yes	AAATCAGTTTATCAA
PP15	PP13	69.6Kb	intact(150)	transposase,tail,recombinase,head,portal,terminase,lysin,integrase	2937588-3007246	2826082-2895742				3	72	57	7	0.888	8	yes	AGTTTAATGTTT
PP16	PP14	24.8Kb	intact(120)	integrase,recombinase,transposase,tail	3330500-3355371	3218995-3243866				3	35	29	4	0.942	2	yes	CTTTCCCATGGTACCC
PP17	PP15	44Kb	intact(120)	portal,tail,capsid,head	3406402-3450430	3294897-3338925				3	55	50	3	0.963	2	yes	TGGCGGAGAGAGGGGG
PP18-Stx1a	-	53.6Kb	intact(150)	tail,head,portal,terminase,lysin,integrase	3633005-3686641	-	TT12A-specific	gamma	lambdoid	0	89	82	1	0.932	6	yes	TACGCGCGTG
PP19	PP16	13.8Kb	incomplete(30)	integrase	3933354-3947209	3768223-3782078				1	10	7	3	1	0	yes	AAAGTTAACGTT
PP20	PP17	44Kb	intact(136)	tail,lysis,lysin,capsid,protease,terminase,integrase	4088096-4132171	3922966-3967041				1	57	56	0	0.982	1	yes	AATCATTCCCACTCAAT
PP21	PP18	32.2Kb	intact(150)	tail,lysin,transposase,recombinase,integrase	4248399-4280676	4083269-4115533				1	40	31	4	0.875	5	yes	GCCAGAAAAAAC
PP22	PP19	32.5Kb	intact(100)	integrase,tail,plate,transposase	4621333-4653906	4456189-4488762				0	12	7	2	0.75	3	yes	CGCTGGAAGAGGCGCTT
PP23	PP20	6.1Kb	questionable(80)	tail,transposase	4651420-4657538	4486276-4492394				0	7	6	0	0.857	1	no	-

## Sheet: ST-3-2 Genomic Islands
I. Genomic Islands in TT12A
Summary: 123 genomic island regions have been identified in TT12A using IslandViewer 4
Island start	Island end	Length [bp]	Gene name	Gene ID	Locus	Gene start	Gene end	Strand	Product
412129	420248	8119	QSZ68809.1	phnO	E5F08_01890	412129	412554	-	aminoalkylphosphonate N-acetyltransferase
570107	574917	4810	QSZ68953.1		E5F08_02690	570107	570241	-	pyrBI operon leader peptide
592671	597467	4796	QSZ68971.1		E5F08_02785	591492	592705	+	IS3 family transposase
593002	599492	6490	QSZ68972.1		E5F08_02795	592888	593265	-	DUF4160 domain-containing protein
601814	609412	7598	QSZ68980.1		E5F08_02840	600976	601827	-	HNH endonuclease
628362	632868	4506			E5F08_02885	623745	630085	+	DEAD/DEAH box helicase
633690	639710	6020	QSZ68989.1		E5F08_02900	633690	634670	-	sialate O-acetylesterase
677053	681769	4716	QSZ69019.1		E5F08_03080	677053	677217	+	DUF1127 domain-containing protein
758938	765363	6425			E5F08_03470	758938	759898	-	fimbrial family protein
978191	984626	6435	QSZ69267.1	gloB	E5F08_04445	978191	978946	-	hydroxyacylglutathione hydrolase
1000579	1005305	4726	QSZ69286.1	tssF	E5F08_04550	999491	1001341	-	type VI secretion system baseplate subunit TssF
1001849	1016165	14316	QSZ69288.1	tssC	E5F08_04560	1001849	1003240	-	type VI secretion system contractile sheath large subunit
1040686	1056563	15877	QSZ69322.1		E5F08_04755	1040686	1041660	-	site-specific integrase
1041201	1045515	4314	QSZ69322.1		E5F08_04755	1040686	1041660	-	site-specific integrase
1046388	1059063	12675	QSZ69330.1		E5F08_04800	1045973	1046416	+	tail assembly chaperone
1052525	1059629	7104	QSZ69335.1		E5F08_04835	1051420	1052601	+	DUF4102 domain-containing protein
1062638	1067014	4376	QSZ69351.1		E5F08_04915	1062638	1063594	-	hypothetical protein
1064609	1070744	6135	QSZ69352.1		E5F08_04920	1064270	1065169	-	LysR family transcriptional regulator
1078196	1086443	8247	QSZ69362.1		E5F08_04985	1077517	1078227	-	fimbrial chaperone EcpE
1082380	1086443	4063	QSZ69365.1		E5F08_05000	1082380	1083048	-	fimbrial chaperone EcpB
1088613	1093211	4598			E5F08_05050	1088613	1088713	-	hypothetical protein
1089279	1093997	4718	QSZ69373.1		E5F08_05055	1089187	1090329	-	NADH-dependent flavin oxidoreductase
1098919	1103329	4410	QSZ69378.1		E5F08_05085	1098919	1099776	-	helix-turn-helix domain-containing protein
1108098	1113062	4964			E5F08_05130	1108098	1108221	-	cons domain protein
1108799	1113749	4950	QSZ69388.1		E5F08_05140	1108874	1109086	-	autotransporter outer membrane beta-barrel domain-containing protein
1180150	1186808	6658	QSZ69443.1		E5F08_05450	1179809	1181887	-	iron ABC transporter permease
1406180	1411977	5797	QSZ73511.1		E5F08_06395	1406254	1406463	-	hypothetical protein
1631498	1644109	12611	QSZ69814.1		E5F08_07495	1631498	1632379	-	integrase
1632542	1670577	38035	QSZ69815.1		E5F08_07500	1632542	1632760	-	excisionase
1632715	1638517	5802	QSZ69815.1		E5F08_07500	1632542	1632760	-	excisionase
1649322	1655975	6653	QSZ69842.1		E5F08_07655	1648355	1650382	+	Clp protease ClpP
1663051	1667473	4422	QSZ69855.1		E5F08_07725	1662500	1663099	+	outer membrane protein
1664477	1669594	5117	QSZ69857.1		E5F08_07735	1664477	1664746	+	phage tail protein
1867642	1874430	6788	QSZ70027.1		E5F08_08655	1867642	1868181	+	fimbrial protein
1905471	1910116	4645	QSZ70061.1		E5F08_08845	1905471	1905662	-	DUF1482 family protein
1906114	1915591	9477	QSZ70063.1		E5F08_08855	1906114	1906419	+	hypothetical protein
1925249	1928502	3253	QSZ70093.1		E5F08_09040	1925249	1925782	-	lysozyme
1930128	1934440	4312	QSZ70102.1		E5F08_09085	1930140	1930382	+	DNA packaging protein
1934457	1939288	4831			E5F08_09105	1934050	1935554	+	S49 family peptidase
1936998	1951081	14083	QSZ70108.1		E5F08_09125	1936998	1937429	+	phage minor tail protein G
1986464	2014346	27882	QSZ70153.1	wrbA	E5F08_09380	1985905	1986483	-	NAD(P)H:quinone oxidoreductase
1989125	2049145	60020	QSZ70158.1		E5F08_09405	1988868	1989128	-	eaa protein
1993976	1999741	5765	QSZ70168.1		E5F08_09460	1993711	1994007	-	host-nuclease inhibitor protein Gam
2002128	2011037	8909	QSZ70180.1		E5F08_09525	1999738	2002131	+	DNA helicase
2034915	2039794	4879	QSZ70228.1		E5F08_09790	2034366	2035022	+	hypothetical protein
2039815	2049689	9874	QSZ70232.1		E5F08_09810	2037077	2045458	+	hypothetical protein
2045741	2050213	4472	QSZ70233.1		E5F08_09815	2045741	2045929	+	hypothetical protein
2071755	2084903	13148	QSZ70259.1	pgaC	E5F08_09965	2070437	2071762	-	poly-beta-1,6 N-acetyl-D-glucosamine synthase
2078161	2099068	20907	QSZ70262.1		E5F08_09985	2078247	2079857	+	cyclic diguanylate phosphodiesterase
2111434	2117762	6328	QSZ70288.1		E5F08_10120	2111594	2112796	+	DUF4102 domain-containing protein
2111594	2146887	35293	QSZ70288.1		E5F08_10120	2111594	2112796	+	DUF4102 domain-containing protein
2111594	2122853	11259	QSZ70288.1		E5F08_10120	2111594	2112796	+	DUF4102 domain-containing protein
2124824	2131071	6247	QSZ70296.1		E5F08_10180	2124480	2124827	-	IS66 family insertion sequence hypothetical protein
2125655	2136655	11000			E5F08_10195	2125653	2126549	+	IS3-like element IS600 family transposase
2136683	2142915	6232			E5F08_10280	2136683	2136943	-	IS3 family transposase
2137010	2141054	4044	QSZ70310.1		E5F08_10285	2137558	2137821	+	type B 50S ribosomal protein L31
2141580	2151085	9505			E5F08_10320	2141338	2142054	-	IS66 family transposase
2151570	2162107	10537	QSZ70327.1		E5F08_10380	2150927	2152069	-	adenine/guanine phosphoribosyltransferase
2155699	2197517	41818	QSZ70332.1	terC	E5F08_10405	2155699	2156739	+	tellurium resistance membrane protein TerC
2161361	2170312	8951	QSZ70336.1	iha	E5F08_10435	2159332	2161422	-	bifunctional siderophore receptor/adhesin Iha
2187950	2192795	4845	QSZ70363.1	ag43	E5F08_10610	2185112	2187961	+	autotransporter adhesin Ag43
2284534	2330658	46124	QSZ70463.1		E5F08_11150	2284534	2285049	+	hypothetical protein
2286534	2291691	5157	QSZ70465.1		E5F08_11165	2286233	2286556	+	transcriptional regulator
2317229	2330658	13429	QSZ70510.1		E5F08_11415	2317229	2317483	-	Arc family DNA-binding protein
2335393	2350856	15463	QSZ70526.1		E5F08_11515	2335567	2336796	+	DUF4102 domain-containing protein
2360498	2405413	44915	QSZ70559.1		E5F08_11690	2360498	2361322	+	replication protein
2502346	2507490	5144	QSZ70701.1		E5F08_12480	2502346	2502537	-	DUF1482 family protein
2512535	2541162	28627	QSZ70719.1		E5F08_12595	2512535	2513065	+	DUF1133 family protein
2549545	2557047	7502	QSZ70757.1		E5F08_12835	2549360	2549548	-	DUF1482 family protein
2550899	2558773	7874	QSZ70760.1		E5F08_12855	2550508	2551146	-	hypothetical protein
2560895	2593165	32270	QSZ70777.1		E5F08_12955	2560895	2561608	+	helix-turn-helix domain-containing protein
2629398	2633428	4030			E5F08_13350	2629398	2633428	+	autotransporter barrel domain-containing lipoprotein
2636276	2643340	7064			E5F08_13365	2636276	2636545	+	AraC family transcriptional regulator
2646201	2650616	4415	QSZ70855.1		E5F08_13410	2646201	2646398	+	two-component-system connector protein SafA
2779277	2804981	25704	QSZ70956.1		E5F08_13970	2779277	2779918	-	DUF1076 domain-containing protein
2813525	2819207	5682	QSZ70991.1		E5F08_14200	2813525	2814916	+	ATPase
2934957	2942875	7918	QSZ71107.1		E5F08_14835	2934957	2935136	+	hypothetical protein
2935222	2976609	41387	QSZ73592.1		E5F08_14840	2935222	2935722	+	ferritin-like domain-containing protein
2936425	2942397	5972			E5F08_14850	2936334	2936450	-	outer membrane protein OmpW
2945591	2950808	5217			E5F08_14910	2945092	2945726	+	transposase
2945773	2951766	5993	QSZ71115.1		E5F08_14915	2945773	2946342	-	effector protein NleF
3331522	3336502	4980	QSZ71475.1		E5F08_16955	3331522	3332523	-	integrase
3332406	3336559	4153	QSZ71475.1		E5F08_16955	3331522	3332523	-	integrase
3371516	3375659	4143	QSZ71525.1		E5F08_17245	3371516	3371995	+	GNAT family N-acetyltransferase
3404287	3420052	15765	QSZ71557.1	zinT	E5F08_17450	3404287	3404958	+	metal-binding protein ZinT
3404287	3409354	5067	QSZ71557.1	zinT	E5F08_17450	3404287	3404958	+	metal-binding protein ZinT
3418616	3428270	9654	QSZ71569.1		E5F08_17520	3417473	3420052	-	phage tail tape measure protein
3425622	3430524	4902	QSZ71577.1		E5F08_17560	3425432	3425638	-	phage tail protein
3438939	3446526	7587	QSZ71594.1		E5F08_17675	3438720	3438998	-	hypothetical protein
3441929	3446621	4692	QSZ71602.1		E5F08_17720	3441561	3442259	-	DUF1627 domain-containing protein
3464725	3469797	5072	QSZ71617.1		E5F08_17815	3464725	3465441	+	YebC/PmpR family DNA-binding transcriptional regulator
3474763	3488516	13753	QSZ71626.1		E5F08_17885	3474763	3476301	+	IS66-like element ISEc8 family transposase
3478249	3484514	6265	QSZ71628.1		E5F08_17900	3477749	3479896	+	TonB-dependent receptor
3513287	3524408	11121	QSZ71662.1	cpsG	E5F08_18115	3512539	3513909	-	phosphomannomutase CpsG
3513913	3524352	10439	QSZ71663.1		E5F08_18120	3513913	3515361	-	Mannose-1-phosphate guanylyltransferase 2
3599778	3605616	5838	QSZ71734.1	rcnB	E5F08_18515	3599778	3600116	+	Ni(II)/Co(II) efflux transporter accessory subunit RcnB
3633485	3666039	32554	QSZ71755.1		E5F08_18635	3633240	3633488	+	DNA damage-inducible protein DinI
3664609	3674091	9482	QSZ73650.1		E5F08_18830	3664435	3664662	-	hypothetical protein
3664813	3683730	18917	QSZ71789.1	stxB1	E5F08_18835	3664813	3665082	-	Shiga toxin Stx1 subunit B
3671745	3683473	11728	QSZ71801.1		E5F08_18910	3671745	3672035	-	protein ren
3935978	3944211	8233	QSZ73657.1	intS	E5F08_20180	3935978	3937135	+	prophage integrase IntS
3937133	3949938	12805	QSZ73657.1	intS	E5F08_20180	3935978	3937135	+	prophage integrase IntS
3949937	3966258	16321			E5F08_20245	3949937	3950155	+	D-serine transporter DsdX
4088771	4114406	25635	QSZ72170.1		E5F08_20905	4088771	4089286	+	glycine zipper 2TM domain-containing protein
4091157	4096402	5245	QSZ72173.1		E5F08_20920	4090538	4091167	-	glycoside hydrolase family 19 protein
4091327	4105532	14205	QSZ72174.1		E5F08_20925	4091157	4091465	-	phage holin family protein
4099829	4104686	4857	QSZ72181.1		E5F08_20965	4099829	4101631	-	hypothetical protein
4115125	4128990	13865	QSZ72196.1		E5F08_21045	4114497	4115972	-	terminase
4117015	4122968	5953	QSZ72198.1		E5F08_21055	4116684	4117022	-	hypothetical protein
4256862	4301014	44152	QSZ72327.1	smpB	E5F08_21760	4256862	4257344	+	SsrA-binding protein SmpB
4258554	4262651	4097			E5F08_21775	4258554	4258721	-	phage tail protein
4268470	4281938	13468	QSZ72343.1		E5F08_21860	4268470	4268637	-	DUF3927 domain-containing protein
4287016	4292876	5860	QSZ72360.1		E5F08_21945	4287016	4287135	-	ATPase
4491982	4519126	27144	QSZ73679.1		E5F08_22945	4491982	4492614	+	helix-turn-helix transcriptional regulator
4501051	4514040	12989	QSZ72548.1		E5F08_23015	4500652	4501233	-	type III secretion apparatus protein OrgA/MxiK
4634279	4653171	18892	QSZ72668.1		E5F08_23695	4634279	4635544	+	DUF4102 domain-containing protein
4642638	4647371	4733			E5F08_23745	4642638	4642746	+	IS481 family transposase
4645210	4651376	6166			E5F08_23760	4645269	4645418	+	IS1 family transposase
5135534	5142099	6565	QSZ73147.1	nikR	E5F08_26285	5135136	5135537	+	nickel-responsive transcriptional regulator NikR
5325735	5330908	5173	QSZ73298.1	rfaC	E5F08_27110	5324746	5325738	+	lipopolysaccharide heptosyltransferase RfaC
5370370	5406199	35829	QSZ73340.1		E5F08_27340	5370523	5370756	+	hypothetical protein
5370523	5406472	35949	QSZ73340.1		E5F08_27340	5370523	5370756	+	hypothetical protein
5468218	5475536	7318	QSZ73436.1		E5F08_27875	5468218	5470626	-	type III effector
II. Genomic islands in TT12B
Summary: 107 genomic island regions have been identified in TT12B using IslandViewer 4
Island start	Island end	Length [bp]	Gene name	Gene ID	Locus	Gene start	Gene end	Strand	Product
570106	574915	4809	QGF14344.1		E5F07_02690	570106	570240	-	pyrBI operon leader peptide
592670	597465	4795	QGF14361.1		E5F07_02785	591491	592704	+	IS3 family transposase
593001	599490	6489	QGF14362.1		E5F07_02795	592887	593264	-	DUF4160 domain-containing protein
601812	609410	7598	QGF14370.1		E5F07_02840	600974	601825	-	HNH endonuclease
633689	639709	6020	QGF18656.1		E5F07_02900	633689	634669	-	sialate O-acetylesterase
677052	681768	4716	QGF14409.1		E5F07_03085	677052	677216	+	DUF1127 domain-containing protein
758937	765362	6425			E5F07_03475	758937	759897	-	fimbrial family protein
978190	984625	6435	QGF14657.1	gloB	E5F07_04450	978190	978945	-	hydroxyacylglutathione hydrolase
996618	1016164	19546	QGF14673.1	tssJ	E5F07_04540	996618	997142	-	type VI secretion system lipoprotein TssJ
1001260	1005463	4203	QGF14676.1	tssF	E5F07_04555	999490	1001340	-	type VI secretion system baseplate subunit TssF
1040684	1056561	15877	QGF14713.1		E5F07_04760	1040684	1041658	-	site-specific integrase
1041199	1045513	4314	QGF14713.1		E5F07_04760	1040684	1041658	-	site-specific integrase
1046599	1059833	13234	QGF14721.1		E5F07_04805	1046034	1046627	+	tail fiber assembly protein
1052523	1064142	11619	QGF14726.1		E5F07_04840	1051418	1052599	+	DUF4102 domain-containing protein
1062636	1067012	4376	QGF14742.1		E5F07_04920	1062636	1063592	-	hypothetical protein
1064607	1070742	6135	QGF14743.1		E5F07_04925	1064268	1065167	-	LysR family transcriptional regulator
1078194	1086441	8247	QGF14753.1		E5F07_04990	1077515	1078225	-	fimbrial chaperone EcpE
1082378	1086441	4063	QGF14756.1		E5F07_05005	1082378	1083046	-	fimbrial chaperone EcpB
1088611	1093209	4598			E5F07_05055	1088611	1088711	-	hypothetical protein
1089277	1093995	4718	QGF14764.1		E5F07_05060	1089185	1090327	-	NADH-dependent flavin oxidoreductase
1098917	1103327	4410	QGF14769.1		E5F07_05090	1098917	1099774	-	helix-turn-helix domain-containing protein
1108096	1113060	4964			E5F07_05135	1108096	1108219	-	cons domain protein
1108797	1113747	4950	QGF14779.1		E5F07_05145	1108872	1109084	-	autotransporter outer membrane beta-barrel domain-containing protein
1181707	1186806	5099	QGF14834.1		E5F07_05455	1179807	1181885	-	iron ABC transporter permease
1497229	1501875	4646			E5F07_06820	1497229	1498206	-	sel1 repeat family protein
1631496	1644107	12611	QGF15204.1		E5F07_07500	1631496	1632377	-	integrase
1632540	1670575	38035	QGF15205.1		E5F07_07505	1632540	1632758	-	excisionase
1663623	1669994	6371	QGF15245.1		E5F07_07735	1663157	1664473	+	phage tail protein
1664475	1669592	5117	QGF15246.1		E5F07_07740	1664475	1664744	+	phage tail protein
1867639	1874427	6788	QGF15416.1		E5F07_08660	1867639	1868178	+	fimbrial protein
1901596	1952815	51219	QGF18703.1		E5F07_08830	1901394	1901606	+	hypothetical protein
1905468	1910113	4645	QGF15450.1		E5F07_08850	1905468	1905659	-	DUF1482 family protein
1922330	1927686	5356			E5F07_09015	1922482	1923458	+	IS3 family transposase
1930125	1934438	4313	QGF15491.1		E5F07_09090	1930137	1930379	+	DNA packaging protein
1934455	1939286	4831	QGF15494.1		E5F07_09110	1934047	1935552	+	S49 family peptidase
2008520	2021669	13149	QGF15561.1	pgaC	E5F07_09485	2007202	2008527	-	poly-beta-1,6 N-acetyl-D-glucosamine synthase
2014927	2037984	23057	QGF15565.1		E5F07_09505	2015013	2016623	+	cyclic diguanylate phosphodiesterase
2048360	2134283	85923	QGF15591.1		E5F07_09640	2048360	2049562	+	DUF4102 domain-containing protein
2048360	2059619	11259	QGF15591.1		E5F07_09640	2048360	2049562	+	DUF4102 domain-containing protein
2061590	2067836	6246	QGF15599.1		E5F07_09700	2061246	2061593	-	IS66 family insertion sequence hypothetical protein
2062421	2073420	10999			E5F07_09715	2062419	2063315	+	IS3-like element IS600 family transposase
2073448	2079681	6233			E5F07_09800	2073448	2073708	-	IS3 family transposase
2073775	2077820	4045	QGF15612.1		E5F07_09805	2074323	2074586	+	type B 50S ribosomal protein L31
2080324	2087851	7527	QGF15621.1		E5F07_09855	2079712	2081325	+	IS66-like element IS682 family transposase
2093594	2099698	6104	QGF15635.1	terD	E5F07_09930	2093554	2094132	+	tellurium resistance membrane protein TerD
2098127	2107078	8951	QGF15638.1	iha	E5F07_09955	2096098	2098188	-	bifunctional siderophore receptor/adhesin Iha
2106182	2112883	6701	QGF15648.1		E5F07_10020	2106364	2106822	-	hypothetical protein
2114929	2120826	5897	QGF15657.1		E5F07_10070	2112861	2115029	+	DUF2726 domain-containing protein
2124716	2129561	4845	QGF15665.1	ag43	E5F07_10130	2121878	2124727	+	autotransporter adhesin Ag43
2223888	2239351	15463	QGF15767.1		E5F07_10675	2224062	2225291	+	DUF4102 domain-containing protein
2248993	2293909	44916	QGF15800.1		E5F07_10850	2248993	2249817	+	replication protein
2260220	2265160	4940	QGF15820.1		E5F07_10960	2259912	2261837	+	phage terminase large subunit family protein
2267435	2274696	7261	QGF15828.1		E5F07_11000	2267178	2267756	+	phage tail protein
2390842	2395986	5144	QGF15942.1		E5F07_11640	2390842	2391033	-	DUF1482 family protein
2401031	2445541	44510	QGF15960.1		E5F07_11755	2401031	2401561	+	DUF1133 family protein
2439394	2450131	10737	QGF16002.1		E5F07_12015	2439003	2439641	-	hypothetical protein
2449389	2482999	33610	QGF16018.1		E5F07_12115	2449389	2450102	+	helix-turn-helix domain-containing protein
2458356	2463595	5239	QGF16029.1		E5F07_12190	2457827	2458372	+	terminase small subunit
2524767	2531831	7064			E5F07_12525	2524767	2525036	+	AraC family transcriptional regulator
2534692	2539107	4415	QGF16096.1		E5F07_12570	2534692	2534889	+	two-component-system connector protein SafA
2667769	2707172	39403	QGF16199.1		E5F07_13130	2667769	2668410	-	DUF1076 domain-containing protein
2699970	2706649	6679	QGF16232.1		E5F07_13345	2700078	2700632	-	DUF1133 family protein
2702018	2707700	5682	QGF16235.1		E5F07_13360	2702018	2703409	+	ATPase
2823451	2831369	7918	QGF16350.1		E5F07_13995	2823451	2823630	+	hypothetical protein
2823716	2865105	41389	QGF18755.1		E5F07_14000	2823716	2824216	+	ferritin-like domain-containing protein
2824919	2830891	5972			E5F07_14010	2824828	2824944	-	outer membrane protein OmpW
2834085	2839303	5218			E5F07_14070	2833586	2834220	+	transposase
2834267	2840261	5994	QGF16358.1		E5F07_14075	2834267	2834836	-	effector protein NleF
3220017	3224997	4980	QGF16717.1		E5F07_16115	3220017	3221018	-	integrase
3260011	3264154	4143	QGF16768.1		E5F07_16405	3260011	3260490	+	GNAT family N-acetyltransferase
3292782	3308547	15765	QGF16800.1	zinT	E5F07_16610	3292782	3293453	+	metal-binding protein ZinT
3292782	3297849	5067	QGF16800.1	zinT	E5F07_16610	3292782	3293453	+	metal-binding protein ZinT
3307111	3319168	12057	QGF16812.1		E5F07_16680	3305968	3308547	-	phage tail tape measure protein
3314117	3319019	4902	QGF16820.1		E5F07_16720	3313927	3314133	-	phage tail protein
3316920	3321634	4714	QGF16822.1		E5F07_16735	3316920	3317144	+	DUF3950 domain-containing protein
3327434	3337588	10154	QGF16837.1		E5F07_16835	3327215	3327493	-	hypothetical protein
3330424	3335100	4676	QGF16845.1		E5F07_16880	3330056	3330754	-	DUF1627 domain-containing protein
3353220	3358292	5072	QGF16860.1		E5F07_16975	3353220	3353936	+	YebC/PmpR family DNA-binding transcriptional regulator
3362861	3377441	14580	QGF16867.1		E5F07_17035	3362484	3362864	+	IS66 family insertion sequence hypothetical protein
3366744	3373009	6265	QGF16871.1		E5F07_17060	3366244	3368391	+	TonB-dependent receptor
3401782	3407142	5360	QGF16905.1	cpsG	E5F07_17275	3401034	3402404	-	phosphomannomutase CpsG
3402408	3412848	10440	QGF16906.1		E5F07_17280	3402408	3403856	-	Mannose-1-phosphate guanylyltransferase 2
3488273	3494111	5838	QGF16978.1	rcnB	E5F07_17675	3488273	3488611	+	Ni(II)/Co(II) efflux transporter accessory subunit RcnB
3770847	3781911	11064	QGF18815.1	intS	E5F07_18905	3770847	3772004	+	prophage integrase IntS
3772002	3784807	12805	QGF18815.1	intS	E5F07_18905	3770847	3772004	+	prophage integrase IntS
3786478	3801128	14650	QGF17221.1	emrY	E5F07_18980	3786478	3788016	-	multidrug efflux MFS transporter permease subunit EmrY
3923641	3950842	27201	QGF17338.1		E5F07_19630	3923641	3924156	+	glycine zipper 2TM domain-containing protein
3926027	3931272	5245	QGF17341.1		E5F07_19645	3925408	3926037	-	glycoside hydrolase family 19 protein
3934699	3939556	4857	QGF17349.1		E5F07_19690	3934699	3936501	-	hypothetical protein
3949995	3963860	13865	QGF17364.1		E5F07_19770	3949367	3950842	-	terminase
3951885	3957838	5953	QGF17366.1		E5F07_19780	3951554	3951892	-	hypothetical protein
4091732	4135871	44139	QGF17495.1	smpB	E5F07_20485	4091732	4092214	+	SsrA-binding protein SmpB
4093424	4097521	4097			E5F07_20500	4093424	4093591	-	phage tail protein
4103340	4116795	13455	QGF17511.1		E5F07_20585	4103340	4103507	-	DUF3927 domain-containing protein
4121873	4127733	5860	QGF17527.1		E5F07_20670	4121873	4121992	-	ATPase
4326840	4353983	27143	QGF18837.1		E5F07_21670	4326840	4327472	+	helix-turn-helix transcriptional regulator
4335909	4348897	12988	QGF17715.1		E5F07_21740	4335510	4336091	-	type III secretion apparatus protein OrgA/MxiK
4469135	4488027	18892	QGF17838.1		E5F07_22425	4469135	4470400	+	DUF4102 domain-containing protein
4474786	4486232	11446	QGF17841.1		E5F07_22460	4474731	4475279	-	Ail/Lom family protein
4477494	4482227	4733			E5F07_22475	4477494	4477602	+	IS481 family transposase
4970390	4976955	6565	QGF18317.1	nikR	E5F07_25015	4969992	4970393	+	nickel-responsive transcriptional regulator NikR
5160591	5165764	5173	QGF18469.1	rfaC	E5F07_25840	5159602	5160594	+	lipopolysaccharide heptosyltransferase RfaC
5205226	5212431	7205	QGF18511.1		E5F07_26070	5205379	5205612	+	hypothetical protein
5205379	5241329	35950	QGF18511.1		E5F07_26070	5205379	5205612	+	hypothetical protein
5212622	5225400	12778	QGF18520.1	escD	E5F07_26120	5211764	5212984	+	type III secretion system LEE inner membrane ring protein EscD
5226635	5237339	10704	QGF18532.1	espZ	E5F07_26185	5226369	5226668	+	type III secretion system LEE cytoprotective effector EspZ
5303075	5310393	7318	QGF18608.1		E5F07_26605	5303075	5305483	-	type III effector

## Sheet: ST-3-3 IS Elements
I. IS Elements on the TT12A and TT12B chromosomes
Summary: 79 and 77 IS elements have been identified in TT12A and B, respectively.
Family	Cluster	Strain-specific IS element	TT12A start	TT12A end	TT12B start	TT12B end	length [bp]	ncopy4is	score	irId	irLen	nGaps	strand	orfLen	E-value	E-value4copy	type	ov	tir
IS1	IS1_316		214369	215138	214368	215137	770	1	40	23	26	0	-	485	7.3e-29	7.3e-29	p	1	AAGGGTGATGACTCCAATTAGTAGAA:AACGGTGATGCCTCCAATTAGTTGAA
IS200/IS605	IS200/IS605_138		523879	525631	523878	525630	1753	2	0	0	0	0		1	1.4e-170	-1	c	2	-:-
IS3	IS3_168		591438	592747	591437	592746	1310	14	38	22	25	0	+	1214	5.8e-138	5.8e-138	c	14	TGAACCGCCCCGGAAATCCTGGAGA:TGAACCGCCCCGGGTTTCCTGGAGA
IS4	IS4_385		632924	633143	632923	633142	220	1	0	0	0	0	-	220	1.3e-22	1.3e-22	p	1	-:-
ISNCY	ISNCY_229		674124	675580	674123	675579	1457	1	22	13	15	0	+	958	9e-121	9e-121	c	1	TCAGTTTCCGGAAAA:TCAGCTTCCGGCAAA
IS21	IS21_259		700515	702510	700514	702509	1996	1	28	23	32	0	-	1280	1.7e-13	1.7e-13	p	1	CTGGTTTCCGCTGCTAAGCAAGTTAGTTAATG:CTGGTGTGCGCTGCTTGGCTCGATAGGTCATG
ISNCY	ISNCY_229		892034	892820	892033	892819	787	1	22	13	15	0	+	897	2.4e-114	2.4e-114	c	1	GAGATACATTTGCCA:GAGATAAATTTGTCA
ISAS1	ISAS1_192		1013122	1014412	1013121	1014411	1291	4	26	19	25	0		1	1.7e-104	-1	c	4	CAGGGAAAGATCACCTAACGCCGCT:CAGGGCAAGATTACGAAAGCCCGCT
ISAS1	ISAS1_192		1016695	1018001	1016694	1018000	1307	1	32	17	18	0	+	1173	9.1e-103	9.1e-103	c	1	GCAGGGCAAGATCATGAA:GCAGGGCAAGAGCATGAA
new	new_343		1047475	1048376	1047473	1048374	902	1	32	21	26	0	+	631	5.8e-64	5.8e-64	c	1	TCATTCCTGCTTTTGTCAGGGAGATC:TCATTCTTGCTACTGTAAGGGGGATC
IS3	IS3_255		1050115	1050892	1050113	1050890	778	1	24	19	26	0	-	484	5.4e-77	5.4e-77	c	1	AAGCACAGGGGCTAAAGTTAAAACGA:AAGCACGGGAGGTTACGATAAAGCGA
IS66	IS66_46		1085971	1088412	1085969	1088410	2442	9	24	17	22	0	+	1539	8.1e-228	8.1e-228	c	9	GTAAGCGTACATCCTGAACCGT:GTAAGCGTACAGCGAGGGCCGT
IS481	IS481_213		1361879	1362940	1361877	1362939	1062	1	20	14	18	0	-	602	5.1e-57	5.1e-57	c	1	ATCCAGATACAAAAAAAG:ATCCTTATCCAAAACAAG
ISAS1	ISAS1_192		1404893	1406183	1404891	1406181	1291	4	26	19	25	0	-	1321	1.7e-104	1.7e-104	c	4	CAGGGCAAGATTACGAAAGCCCGCT:CAGGGAAAGATCACCTAACGCCGCT
ISAS1	ISAS1_192		1554520	1555811	1554518	1555809	1292	4	0	0	0	0		1	1.7e-104	-1	c	4	-:-
IS21	IS21_259		1911026	1912089	1911023	1912086	1064	1	22	11	11	0	+	747	1.1e-16	1.1e-16	p	1	GCTTTCAGTGC:GCTTTCAGTGC
IS3	IS3_168		1922457	1923087	1922454	1923084	631	14	16	11	14	0		1	5.8e-138	-1	c	14	TAAACTCCCTGAGA:TAACCGCCATGAGA
IS66	IS66_46		1927688	1930125	1927685	1930122	2438	9	24	16	20	0		1	8.1e-228	-1	c	9	AAGCGTACAGCCTGAACCGT:AAGCGTACAGCGAGGGCCGT
IS66	IS66_46		1930073	1933618	1930070	1933615	3546	1	22	15	19	0		1	2.8e-226	-1	c	1	GCACTGCCAGCTGAATAAC:GCCCTGGCACTTGAATAAC
IS1	IS1_316		2114823	2115797	2051589	2052563	975	1	28	29	41	1	+	682	6.2e-52	6.2e-52	c	1	ATATAAAATTTTAACATTA-TATCATTTTGCTTTTCTGTTA:ATAGAAAACGACAGCATTAGTGTTATTTTACTTTTCCCTTA
IS66	IS66_46		2122855	2125296	2059621	2062062	2442	9	28	18	22	0		1	8.1e-228	-1	c	9	GTAAGCGTACAGCGAGGGCCGT:GTAAGCGTACAGCCTGAACCGT
IS30	IS30_173		2125039	2125716	2061805	2062482	678	1	30	15	15	0	-	312	1e-17	1e-17	p	1	ATTGTTGTCGCCATT:ATTGTTGTCGCCATT
IS3	IS3_176		2125491	2127778	2062257	2064544	2288	1	22	14	17	0	+	1827	2.6e-140	2.6e-140	c	1	GGTTTTGAACCCAGGAT:GGTTTTGAACTCCTGAT
IS3	IS3_472		2136122	2137199	2072887	2073964	1078	1	28	19	24	0	-	550	2.7e-42	2.7e-42	p	1	GAAAAGATCCCGCGTAAAGGCGGT:GAAAAAATATACCGTAAAGGCGGT
IS66	IS66_43		2141257	2142408	2078023	2079174	1152	1	24	20	25	1	-	781	3.9e-88	3.9e-88	p	1	GGCTCATTTCCTGTCGTCAGGCGTT:GGCTC-TTTCTGCTCATCAGGCGTT
IS66	IS66_46		2142380	2144603	2079146	2081369	2224	2	0	0	0	0		1	1.4e-227	-1	p	2	-:-
IS66	IS66_43		2144414	2145863	2081180	2082629	1450	1	26	25	34	1	-	858	1e-85	1e-85	c	1	TGTTGTACGGGCTGATCGGCA-CCTGCCGTCTGA:TGTTTTCCGGGCTCTTCGCCATGCTGACGCCTGA
IS66	IS66_393		2145488	2146254	2082254	2083020	767	1	20	26	39	1	-	658	1.6e-32	1.6e-32	p	1	GCATCTTCGGGTTCTTACTGGTATACCCATTTTGCCAGG:GCATCCTGGTGTCGTTACGGGGA-AGTCATCTTCACAGG
IS66	IS66_345		2158475	2158985	2095241	2095751	511	1	22	11	11	0	+	683	2.7e-18	2.7e-18	p	1	CGATCAGGCTG:CGATCAGGCTG
IS1	IS1_316		2168214	2169485	2104980	2106251	1272	1	22	18	25	0	-	1000	4.6e-94	4.6e-94	c	1	AAAATTAAAAAACAACGGGAAACAA:AAAATAAAAATGCAACTATAAAAAA
IS3	IS3_168		2172860	2174169	2109626	2110935	1310	14	38	22	25	0		1	5.8e-138	-1	c	14	TGAACCGCCCCGGTTTTCCTGGAGA:TGAACCGCCCCGGGAATCCTGGAGA
IS481	IS481_228		2181991	2182290	2118757	2119056	300	1	0	0	0	0	+	300	1.7e-11	1.7e-11	p	1	-:-
IS3	IS3_168		2182330	2182578	2119096	2119344	249	1	0	0	0	0	-	249	5.8e-31	5.8e-31	p	1	-:-
IS3	IS3_255	TT12A-specific	2326285	2328044	-	-	1760	1	26	16	19	0	-	1291	8.3e-177	8.3e-177	c	1	AGGAAAATATCTCAATGGT:AGGAAAAGATCGCAATTGT
IS256	IS256_47	TT12A-specific	2328101	2328400	-	-	300	1	0	0	0	0	+	300	7.7e-27	7.7e-27	p	1	-:-
IS66	IS66_46		2397613	2400054	2286108	2288549	2442	9	28	18	22	0		1	8.1e-228	-1	c	9	GTAAGCGTACAGCCTGAACCGT:GTAAGCGTACAGCGAGGGCCGT
IS3	IS3_168		2404146	2405455	2292642	2293951	1310	14	38	22	25	0		1	5.8e-138	-1	c	14	TGAACCGCCCCGGAAATCCTGGAGA:TGAACCGCCCCGGGTTTCCTGGAGA
IS3	IS3_168		2405520	2406717	2294016	2295213	1198	1	28	18	22	0		1	2.3e-137	-1	c	1	TAATGATATTCCTGAGGGGATT:TAAAGATATTCTTGAGGTCATT
IS3	IS3_168		2426277	2427586	2314773	2316082	1310	14	42	31	41	0		1	5.8e-138	-1	c	14	TGAACCGCCCCGGGTTTCCTGGAGAGTATTTTATCTGTGAA:TGAACCGCCCCGGAAATCCTGGAGACTAAACTCCCTGAGAA
IS256	IS256_47		2543178	2544049	2431673	2432544	872	1	22	22	33	0	+	423	2.8e-44	2.8e-44	p	1	TGGATGCAGACCAACAGAAACAGCATTGTAAAT:TGGGTGGAAATCGACAACAACATCGCTGAAAAT
IS66	IS66_46		2543758	2546199	2432253	2434694	2442	9	28	18	22	0	-	1539	8.1e-228	8.1e-228	c	9	GTAAGCGTACAGCGAGGGCCGT:GTAAGCGTACAGCCTGAACCGT
IS256	IS256_47		2545824	2547422	2434319	2435917	1599	1	22	15	19	0	+	903	4.5e-137	4.5e-137	c	1	ATACTGAGGGTTTCCGGGT:ATTCTGTGGGTTTTTGGGT
ISAS1	ISAS1_192		2699207	2700519	2587698	2589010	1313	4	18	13	17	0		1	1.7e-104	-1	c	4	AGGGCAAGATTACGAAA:AGGGAAAGATCATCAAA
IS21	IS21_259		2819955	2821177	2708448	2709670	1223	1	22	17	23	0	-	747	1.8e-18	1.8e-18	p	1	CGCTTTCAGTGCGTCAAAAACGG:CGCTGCCAGCGTTACAAAAACGG
IS3	IS3_168		2841537	2842846	2730030	2731339	1310	14	38	22	25	0		1	5.8e-138	-1	c	14	TGAACCGCCCCGGAAATCCTGGAGA:TGAACCGCCCCGGTTTTCCTGGAGA
IS630	IS630_214		2938366	2939498	2826860	2827992	1133	1	34	19	21	0	+	842	4.6e-125	4.6e-125	c	1	ACTAAATAGCTGCGCAGAATA:ACTAAATAGCTGCGCCTAATA
IS66	IS66_46		2942403	2944844	2830897	2833338	2442	9	28	18	22	0	+	1539	8.1e-228	8.1e-228	c	9	GTAAGCGTACAGCCTGAACCGT:GTAAGCGTACAGCGAGGGCCGT
IS256	IS256_47		2945154	2945694	2833648	2834188	541	1	20	15	20	0	+	635	1.6e-74	1.6e-74	p	1	CGAAAATGAAGGGGCGAATT:CGATAATAAAGCGGCTCATT
IS21	IS21_259		2986056	2987670	2874552	2876166	1615	1	20	16	22	0	-	1710	5.8e-16	5.8e-16	p	1	CCATCGAAAATTTACCTCGTCA:CCATTGAAACTATCCGGCGTCA
IS3	IS3_168		3192577	3193886	3081072	3082381	1310	14	38	22	25	0		1	5.8e-138	-1	c	14	TGAACCGCCCCGGGAATCCTGGAGA:TGAACCGCCCCGGTTTTCCTGGAGA
IS3	IS3_168		3342026	3343033	3230521	3231528	1008	14	16	8	8	0		1	5.8e-138	-1	p	14	ACTCCCTG:ACTCCCTG
IS30	IS30_173		3350353	3351546	3238848	3240041	1194	1	42	29	37	0	-	1270	4.7e-143	4.7e-143	c	1	AAAAAGGCACTTGTAGATTCAATCTGTCAATGCAACA:AACAATGTAAGTGTAGATTCAATTGGTCAACGCAACA
IS66	IS66_46		3425905	3427760	3314400	3316255	1856	1	22	14	17	0		1	2.8e-226	-1	c	1	TCATCAGGAAAACGGAT:TCAAAAGGAAAACTGAT
IS3	IS3_168		3431872	3433181	3320367	3321676	1310	14	38	22	25	0	+	1214	5.8e-138	5.8e-138	c	14	TGAACCGCCCCGGAAATCCTGGAGA:TGAACCGCCCCGGGTTTCCTGGAGA
IS66	IS66_46		3473897	3476338	3362392	3364833	2442	9	28	18	22	0	+	1539	8.1e-228	8.1e-228	c	9	GTAAGCGTACAGCCTGAACCGT:GTAAGCGTACAGCGAGGGCCGT
IS3	IS3_176		3486913	3487536	3375408	3376031	624	2	0	0	0	0		1	3e-121	-1	p	2	-:-
IS3	IS3_168		3627865	3629174	3516360	3517669	1310	14	38	22	25	0		1	5.8e-138	-1	c	14	TGAACCGCCCCGGGTTTCCTGGAGA:TGAACCGCCCCGGAAATCCTGGAGA
ISNCY	ISNCY_229		3829233	3829915	3664102	3664784	683	1	24	12	12	0	+	927	7.9e-137	7.9e-137	p	1	CCTGCAAACCTT:CCTGCAAACCTT
IS3	IS3_168		3831673	3832982	3666542	3667851	1310	14	38	22	25	0	+	1214	5.8e-138	5.8e-138	c	14	TGAACCGCCCCGGAAATCCTGGAGA:TGAACCGCCCCGGGTTTCCTGGAGA
ISNCY	ISNCY_229		3891342	3892957	3726211	3727826	1616	1	24	17	22	0	-	891	8.6e-128	8.6e-128	c	1	GCTGCTGGATAACGAGCTGCGC:GCTGGTGGGTGAAGTGCTGCGC
IS200/IS605	IS200/IS605_138		3988818	3990570	3823688	3825440	1753	2	0	0	0	0	-	1209	1.4e-170	1.4e-170	c	2	-:-
IS3	IS3_168		4262646	4263955	4097516	4098825	1310	14	38	22	25	0	+	1214	5.8e-138	5.8e-138	c	14	TGAACCGCCCCGGAAATCCTGGAGA:TGAACCGCCCCGGTTTTCCTGGAGA
IS66	IS66_46		4263927	4264294	4098797	4099164	368	1	22	17	23	0	-	449	2.9e-32	2.9e-32	p	1	ACACTCTCCAGGAAAACCGGGGC:ACGCCCTGCAGGAAAAGCTGAGC
IS66	IS66_393		4264530	4265233	4099400	4100103	704	1	22	24	34	1	-	725	1.3e-59	1.3e-59	p	1	AGGCGAAGCGCCCACGCTCCAGCCGTTTGGTCAG:AGGGTAAGCGTACA-GCCTGAACCGTCTGGTCAG
IS30	IS30_173		4272480	4273561	4107350	4108431	1082	1	18	16	23	0	+	1094	2.3e-72	2.3e-72	c	1	AAACATGGGGTTGCGGAGTTTTT:AAAGATGTATGTGCTGACTTTTT
IS3	IS3_168		4282021	4283441	4116878	4118298	1421	1	24	17	22	0		1	2.3e-137	-1	c	1	GATGCCATCAGGAAGTTGAACC:GATGGCAACAGCAACTGGAACC
IS66	IS66_46		4635408	4636610	4470264	4471466	1203	1	22	21	28	1	-	869	7.6e-98	7.6e-98	p	1	CTTACATTCATAAA-GCAGAACATCTGG:CTTCAAATCTTAAACGCAGAGCATCAGG
IS66	IS66_46		4637601	4639312	4472457	4474168	1712	1	30	16	17	0	+	1449	3.2e-185	3.2e-185	c	1	AGCAACTGAAGGCCCTG:AGCAACTGAAGGCACTG
IS4	IS4_190		4641452	4642912	4476308	4477768	1461	1	24	15	18	0	+	1418	7.9e-69	7.9e-69	c	1	CTCAGCATGCAGGTCTTT:CTGAGCTTACAGGTCTTT
IS630	IS630_214		4647576	4648781	4482432	4483637	1206	1	42	38	52	1	+	846	1.9e-162	1.9e-162	c	1	TAGTAGCAAAGCAGAAGTTCAAAATCACCA-ACTAAATAGCTGCGCCGAATA:TAGTGGCACAGAACTTCTGCGACCTGACCATCCTAAATAGCTGCGCCGAATA
IS3	IS3_168		4651378	4652687	4486234	4487543	1310	14	38	22	25	0		1	5.8e-138	-1	c	14	TGAACCGCCCCGGTTTTCCTGGAGA:TGAACCGCCCCGGAAATCCTGGAGA
IS66	IS66_46		4652739	4654671	4487595	4489527	1933	9	16	11	14	0		1	8.1e-228	-1	c	9	AGGTAACGTTCCGG:AGGTAGCTTTCTGG
IS66	IS66_46		4654797	4657210	4489653	4492066	2414	2	0	0	0	0		1	1.4e-227	-1	p	2	-:-
IS3	IS3_461		4657267	4657528	4492123	4492384	262	1	0	0	0	0	+	262	2.1e-31	2.1e-31	p	1	-:-
IS3	IS3_168		4815138	4816447	4649994	4651303	1310	14	38	22	25	0		1	5.8e-138	-1	c	14	TGAACCGCCCCGGAAATCCTGGAGA:TGAACCGCCCCGGTTTTCCTGGAGA
ISNCY	ISNCY_229		5036979	5038329	4871835	4873185	1351	1	26	20	27	0	+	879	4.1e-126	4.1e-126	c	1	GCAAAGCCGTGCGGATTCAGGAAGAAC:GCAAAGTGGTGCCGATGCTGGATAAAC
IS3	IS3_176		5364340	5365981	5199196	5200837	1642	1	22	13	15	0	+	1342	3e-121	3e-121	c	1	CTGAATTCAGGCTGG:CTGAATCCCGGCTGG
IS66	IS66_46		5367922	5370363	5202778	5205219	2442	9	28	18	22	0	+	1539	8.1e-228	8.1e-228	c	9	GTAAGCGTACAGCCTGAACCGT:GTAAGCGTACAGCGAGGGCCGT
IS21	IS21_259		5450225	5452345	5285082	5287202	2121	1	22	15	19	0	-	1404	5.8e-13	5.8e-13	p	1	TTTCCGCGCCTTCAGGCAG:TTTCCGCACCTTTTCGCAG
II. IS Elements on plasmid pO157 of TT12A and TT12B
Summary: Eight IS elements have been identified in pO157 TT12A and B
Family	Cluster	Strain-specific IS element	TT12A start	TT12A end	TT12B start	TT12B end	length [bp]	ncopy4is	score	irId	irLen	nGaps	strand	orfLen	E-value	E-value4copy	type	ov	tir
IS91	IS91_389		2579	4246	2579	4246	1668	1	20	17	21	0	-	1560	9.7e-111	9.7e-111	p	1	ATAGATA-TACATAAAAAGAA:ATAGATACTACAGACAAAAAA
IS3	IS3_168		4332	8066	4332	8066	3735	1	0	0	0	0		1	9e-140	-1	p	2	-:-
IS3	IS3_524		19177	19343	19176	19342	167	1	0	0	0	0	+	167	3.5e-15	3.5e-15	p	1	-:-
IS3	IS3_176		34475	35726	34475	35726	1252	1	26	20	27	0	+	1278	5.8e-141	5.8e-141	c	1	TGTAGTGGCACACTGAATTTGGCCACC:TGTAGTGGTCAACAAAAACTGGCCACC
IS3	IS3_168		50869	52099	50869	52099	1231	1	14	8	9	0	-	1214	9e-140	9e-140	p	2	CGGTTTTCC:CGTTTTTCC
IS3	IS3_486		74784	75541	74784	75541	758	1	18	17	25	0	-	476	1.6e-86	1.6e-86	c	1	CCAAACTGCCCCCCTATAACAGCAA:CCAATCTGAGTCGCAATATCAACAA
IS21	IS21_455		75354	76138	75352	76136	785	1	18	18	27	0	+	573	1.3e-90	1.3e-90	p	1	TATCCTTATCCGCCAGTGATATAAGAC:TATCTATACCCTCTAATTATGTAACAC
IS3	IS3_539		85780	86493	85778	86491	714	1	22	15	19	0	+	350	1.5e-62	1.5e-62	c	1	AACCGTGACGGAAAGCCTG:AACCGCCCCGGAAATCCTG

## Sheet: ST-3-4 Virulence genes
I. Virulence genes on the TT12A and TT12B chromosomes
Summary: 112 virulence genes are shared by TT12A and B chromosomes. Seven viruelnce genes are located on TT12A-specific phages.
Gene	Strain-specific	TT12A start	TT12A end	TT12B start	TT12B end	Strand	Coverage	Gap	% Coverage	% Identity	Product
aslA		59144	60572	59143	60571	-	1-1428/1428	"1/1"	100	93.91	putative arylsulfatase
espL4		309633	311819	309632	311818	-	1-2187/2187	0/0	100	100	Type III secretion system effector EspL4
espX4		346057	347637	346056	347636	+	1-1581/1581	0/0	100	100	Type III secretion system effector EspX4
espX5		377099	378391	377098	378390	-	1-1293/1293	0/0	100	100	Type III secretion system effector EspX5
fimB		638034	638636	638033	638635	+	1-603/603	0/0	100	98.18	Type 1 fimbriae Regulatory protein fimB
fimE		639114	639710	639113	639709	+	1-597/597	0/0	100	98.33	Type 1 fimbriae Regulatory protein fimE
fimA		640118	640723	640117	640722	+	1-606/606	0/0	100	92.24	Type 1 fimbrial protein A chain precursor
fimI		640788	641327	640787	641326	+	1-540/540	0/0	100	98.52	Fimbrin-like protein fimI precursor
fimC		641364	642089	641363	642088	+	1-726/726	0/0	100	97.93	Chaperone protein fimC precursor
fimD		642156	644792	642155	644791	+	1-2637/2637	0/0	100	98.18	Outer membrane usher protein fimD precursor
fimF		644799	645332	644798	645331	+	1-534/534	0/0	100	97.94	FimF protein precursor
fimG		645345	645848	645344	645847	+	1-504/504	0/0	100	98.02	FimG protein precursor
fimH		645859	646770	645858	646769	+	1-912/912	0/0	100	97.26	FimH protein precursor
espX6		666433	668634	666433	668634	-	1-2196/2196	"1/6"	100	99.73	Type III secretion system effector EspX6
espX1		763942	765363	763941	765362	-	1-1422/1422	0/0	100	100	Type III secretion system effector EspX1
espY1		804062	804814	804061	804813	+	1-753/753	0/0	100	100	Type III secretion system effector EspY1
espY2		821284	821853	821283	821852	+	1-570/570	0/0	100	100	Type III secretion system effector EspY2
yagV/ecpE		1077517	1078272	1077515	1078270	-	1-756/756	0/0	100	100	E. coli common pilus chaperone EcpE
yagW/ecpD		1078196	1079839	1078194	1079837	-	1-1644/1644	0/0	100	100	polymerized tip adhesin of ECP fibers
yagX/ecpC		1079829	1082354	1079827	1082352	-	1-2526/2526	0/0	100	100	E. coli common pilus usher EcpC
yagY/ecpB		1082380	1083048	1082378	1083046	-	1-669/669	0/0	100	100	E. coli common pilus chaperone EcpB
yagZ/ecpA		1083106	1083693	1083104	1083691	-	1-588/588	0/0	100	100	E. coli common pilus structural subunit EcpA
ykgK/ecpR		1083768	1084358	1083766	1084356	-	1-591/591	0/0	100	100	regulator protein EcpR
fdeC		1094545	1098786	1094543	1098784	+	1-4245/4251	"3/5"	99.76	92.16	adhesin FdeC
espY3		1242149	1243720	1242147	1243718	-	1-1572/1572	0/0	100	100	Type III secretion system effector EspY3
entD		1431417	1432187	1431415	1432185	-	1-771/771	0/0	100	94.29	phosphopantetheinyl transferase component of enterobactin synthase multienzyme complex
fepA		1432212	1434452	1432210	1434450	-	1-2241/2241	0/0	100	96.88	ferrienterobactin outer membrane transporter
fes		1434695	1435897	1434693	1435895	+	1-1203/1203	0/0	100	96.76	enterobactin/ferric enterobactin esterase
entF		1436115	1439968	1436113	1439966	+	1-3854/3882	2/2"	99.25	95.72	enterobactin synthase multienzyme complex component ATP-dependent
fepC		1441342	1442157	1441340	1442155	-	1-816/816	0/0	100	96.32	ferrienterobactin ABC transporter ATPase
fepG		1442154	1443146	1442152	1443144	-	1-993/993	0/0	100	94.16	iron-enterobactin ABC transporter permease
fepD		1443143	1444159	1443141	1444157	-	1-1017/1017	0/0	100	96.66	ferrienterobactin ABC transporter permease
entS		1444258	1445508	1444256	1445506	+	1-1251/1251	0/0	100	96.4	enterobactin exporter iron-regulated
fepB		1445512	1446468	1445510	1446466	-	1-957/957	0/0	100	97.6	ferrienterobactin ABC transporter periplasmic binding protein
entC		1446645	1447832	1446643	1447830	+	1-1188/1188	0/0	100	98.15	isochorismate synthase 1
entE		1447842	1449452	1447840	1449450	+	1-1611/1611	0/0	100	95.41	23-dihydroxybenzoate-AMP ligase component of enterobactin synthase multienzyme complex
entB		1449466	1450323	1449464	1450321	+	1-858/858	0/0	100	98.14	isochorismatase
entA		1450323	1451069	1450321	1451067	+	1-747/747	0/0	100	96.12	23-dihydro-23-dihydroxybenzoate dehydrogenase
nleB2		1664923	1665903	1664921	1665901	+	1-981/981	0/0	100	100	Type III secretion system effector NleB2
nleC		1665964	1666956	1665962	1666954	+	1-993/993	0/0	100	100	Type III secretion system effector NleC zinc metalloprotease
nleH1		1667784	1668665	1667782	1668663	+	1-882/882	0/0	100	100	Type III secretion system effector NleH1
nleD		1668896	1669594	1668894	1669592	+	1-699/699	0/0	100	99.86	Type III secretion system effector NleD
espX2		1695516	1697528	1695514	1697526	+	1-2013/2013	0/0	100	99.95	Type III secretion system effector EspX2
ompA		1888786	1889826	1888783	1889823	-	1-1041/1041	0/0	100	98.08	outer membrane protein A
stx2A	TT12A-specific	2009468	2010427	-	-	+	1-960/960	0/0	100	99.9	Shiga toxin II A subunit
stx2B	TT12A-specific	2010439	2010708	-	-	+	1-270/270	0/0	100	100	Shiga toxin II B subunit
csgG		2200953	2201786	2137719	2138552	-	1-834/834	0/0	100	83.21	curli production assembly/transport protein CsgG
csgF		2201813	2202229	2138579	2138995	-	1-417/417	"3/8"	99.04	81.23	curli production assembly/transport protein CsgF
csgD		2202648	2203298	2139414	2140064	-	1-651/651	0/0	100	81.57	DNA-binding transcriptional regulator CsgD
csgB		2204052	2204507	2140818	2141273	+	1-456/456	"2/2"	99.78	83.37	minor curlin subunit precursor curli nucleator protein CsgB
espX7/nleL	TT12A-specific	2320378	2322327	-	-	+	1-1950/1950	0/0	100	99.95	Type III secretion system effector NleL putative E3 ubiquitin ligase
espN	TT12A-specific	2323506	2326319	-	-	+	1-2814/2814	0/0	100	99.89	Type III secretion system effector EspN
espK	TT12A-specific	2328964	2330325	-	-	-	1-1362/1362	0/0	100	100	Type III secretion system effector EspK
paa		2509031	2509789	2397527	2398285	+	1-759/759	0/0	100	100	outer membrane adhesin Paa
nleG7'		2542562	2543208	2431057	2431703	+	1-648/648	"1/1"	99.85	99.85	Type III secretion system effector NleG7 E3 Ubiquitin Ligase
astA		2546529	2546643	2435024	2435138	+	3-117/117	0/0	98.29	90.44	heat-stable enterotoxin 1
espR1		2686544	2687803	2575035	2576294	+	1-1260/1260	0/0	100	100	Type III secretion system effector espR1
espM1		2939745	2940335	2828239	2828829	-	1-591/591	0/0	100	100	Type III secretion system effector EspM1 Rho guanine exchange factor
east1		2945257	2945353	2833751	2833847	+	21-117/117	0/0	82.91	97.94	EAST1
nleF		2945773	2946342	2834267	2834836	-	1-570/570	0/0	100	100	Type III secretion system effector NleF caspase inhibitor
nleH2		2946408	2947319	2834902	2835813	-	1-912/912	0/0	100	100	Type III secretion system effector NleH2
nleA/espI		2949146	2950471	2837640	2838965	+	1-1326/1326	0/0	100	100	Type III secretion system effector NleA
espL1		3141199	3143097	3029695	3031593	+	1-1899/1899	0/0	100	99.89	Type III secretion system effector espL1
espR3		3372133	3373272	3260628	3261767	-	1-1140/1140	0/0	100	99.56	Type III secretion system effector espR3
espR4		3374091	3375230	3262586	3263725	-	1-1140/1140	0/0	100	100	Type III secretion system effector espR4
espJ		3406968	3407621	3295463	3296116	+	1-654/654	0/0	100	100	Type III secretion system effector EspJ adenosine diphosphate (ADP
espFu/tccP		3407946	3408938	3296441	3297433	+	1-993/1155	0/0	85.97	97.08	Type III secretion system effector TccP
stx1B	TT12A-specific	3664813	3665082	-	-	-	1-270/270	0/0	100	100	Shiga toxin 1 subunit B
stxA	TT12A-specific	3665092	3666039	-	-	-	1-948/948	0/0	100	99.79	Shiga toxin 1 subunit A
espM2		4258940	4259530	4093810	4094400	-	1-591/591	0/0	100	100	Type III secretion system effector EspM2 Rho guanine exchange factor
espW		4260442	4261500	4095312	4096370	+	1-1059/1059	0/0	100	100	Type III secretion system effector EspW
espL2		4643402	4645051	4478258	4479907	+	1-1650/1650	0/0	100	99.94	Type III secretion system effector espL2
nleB1		4645659	4646648	4480515	4481504	+	1-990/990	0/0	100	100	Type III secretion system effector nleB1
nleE		4646697	4647371	4481553	4482227	+	1-675/675	0/0	100	100	Type III secretion system effector NleE
shuS		5170330	5171358	5005186	5006214	-	1-1029/1029	0/0	100	98.83	heme/hemoglobin transport protein ShuS
shuA		5171407	5173389	5006263	5008245	-	1-1983/1983	0/0	100	99.5	outer membrane heme/hemoglobin receptor ShuA
shuT		5173994	5174986	5008850	5009842	+	1-993/993	0/0	100	98.19	periplasmic binding protein ShuT
chuW		5175006	5176343	5009862	5011199	+	1-1338/1338	0/0	100	96.64	Putative oxygen independent coproporphyrinogen III oxidase
shuX		5176356	5176850	5011212	5011706	+	1-495/495	0/0	100	98.79	shu locus protein ShuX
shuY		5176850	5177471	5011706	5012327	+	1-622/624	0/0	99.68	96.3	shu locus protein ShuY
chuU		5177522	5178514	5012378	5013370	+	1-993/993	0/0	100	97.78	heme permease protein ChuU
chuV		5178481	5179281	5013337	5014137	+	1-801/801	0/0	100	98.25	ATP-binding hydrophilic protein ChuV
espF		5371191	5371937	5206047	5206793	-	1-747/747	0/0	100	100	Type III secretion system effector EspF
escG		5372022	5372300	5206878	5207156	-	1-279/279	0/0	100	100	chaperone for EscF
escF		5372306	5372527	5207162	5207383	-	1-222/222	0/0	100	100	Type III secretion system needle filament protein EscF
cesD2		5372563	5372970	5207419	5207826	-	1-408/408	0/0	100	100	chaperone for EspD
espB		5372977	5373915	5207833	5208771	-	1-939/939	0/0	100	100	Type III secretion system translocator protein EspB pore protein
espD		5373936	5375060	5208792	5209916	-	1-1125/1125	0/0	100	100	Type III secretion system translocator protein EspD pore protein
espA		5375073	5375651	5209929	5210507	-	1-579/579	0/0	100	100	Type III secretion system translocator protein EspA
sepL		5375710	5376765	5210566	5211621	-	1-1056/1056	0/0	100	100	Type III secretion system secretion gatekeeper SepL
escD		5376908	5378128	5211764	5212984	+	1-1221/1221	0/0	100	100	Type III secretion system outer MS ring protein EscD
eae		5378792	5381196	5213648	5216052	-	1-2401/2820	"9/20"	84.86	91.38	intimin
cesT		5381256	5381726	5216112	5216582	-	1-471/471	0/0	100	100	multieffector chaperone
tir		5381864	5383539	5216720	5218395	-	1-1677/1677	"1/1"	99.94	99.94	translocated intimin receptor protein
map		5383963	5384574	5218819	5219430	-	1-612/612	0/0	100	100	Type III secretion system effector Map Rho guanine exchange factor
cesF		5384840	5385223	5219696	5220079	+	1-384/384	0/0	100	100	CesF chaperone for EspF
espH		5385421	5385927	5220277	5220783	-	1-507/507	0/0	100	100	Type III secretion system effector EspH RhoGEF Inhibitor
sepQ/escQ		5385958	5386875	5220814	5221731	-	1-918/918	0/0	100	100	Type III secetion system C ring protein EscQ
escP		5386838	5387113	5221694	5221969	-	1-276/276	0/0	100	100	Type III secretion system needle length regulator EscP
escO		5387247	5387624	5222103	5222480	-	1-378/378	0/0	100	100	positive regulator EscO
escN		5387627	5388966	5222483	5223823	-	1-1341/1341	"1/1"	99.93	99.92	ATPase EscN
escV		5388950	5390977	5223807	5225834	-	1-2028/2028	0/0	100	100	Type III secretion system major export apparatus protein
cesL		5390974	5391327	5225831	5226184	-	1-354/354	0/0	100	100	chaperone for SepL
sepZ/espZ		5391512	5391811	5226369	5226668	+	1-300/300	0/0	100	100	Type III secretion system effector EspZ
escI		5391844	5392272	5226701	5227129	+	1-429/429	0/0	100	100	Type III secretion system inner rod component EscI
escJ		5392275	5392847	5227132	5227704	+	1-573/573	0/0	100	100	Type III secretion system inner MS ring protein EscJ
sepD		5392853	5393308	5227710	5228165	+	1-456/456	0/0	100	100	Type III secretion system secretion switch protein SepD
escC		5393308	5394846	5228165	5229703	+	1-1539/1539	0/0	100	100	Type III secretion system secretin EscC
cesD		5394860	5395315	5229717	5230172	+	1-456/456	0/0	100	100	chaperone for EspB and EspD
etgA		5396734	5397192	5231591	5232049	+	1-459/459	0/0	100	99.78	T3SS-associated peptidoglycan lytic enzyme
escU		5397189	5398226	5232046	5233083	-	1-1038/1038	0/0	100	100	Type III secretion system export apparatus switch protein EscU
escT		5398219	5398995	5233076	5233852	-	1-777/777	0/0	100	100	Type III secretion system minor export apparatus protein EscT
escS		5398995	5399264	5233852	5234121	-	1-270/270	0/0	100	100	Type III secretion systemminor export apparatus protein EscS
escR		5399264	5399917	5234121	5234774	-	1-654/654	0/0	100	100	Type III secretion systemminor export apparatus protein EscR
escL		5399922	5400536	5234779	5235393	-	1-615/615	0/0	100	100	negative regulator EscL stator protein
cesAB		5401158	5401481	5236015	5236338	-	1-324/324	0/0	100	100	chaperone for EspA and EspB
escE		5401485	5401703	5236342	5236560	-	1-219/219	0/0	100	100	chaperone for EscF
espG		5403352	5404548	5238209	5239405	+	1-1197/1197	0/0	100	100	Type III secretion system effector EspG GTPase activating protein
espY4		5468218	5470626	5303075	5305483	-	1-2409/2409	0/0	100	100	Type III secretion system effector EspY4
II. Virulence genes on pO157 of TT12A and TT12B
Summary: Seven pO157-harbored virulence genes are shared by TT12A and B
Gene	Strain-specific	TT12A start	TT12A end	TT12B start	TT12B end	Strand	Coverage	Gap	% Coverage	% Identity	Product
espP		8202	12104	8202	12104	+	1-3903/3903	0/0	100	100	autotransporter serine protease EspP
stcE		19972	22668	19971	22667	+	1-2697/2697	0/0	100	100	metalloprotease StcE
hlyC		36259	36774	36259	36774	+	1-516/516	0/0	100	100	hemolysin transport protein HlyC
hlyA		36776	39772	36776	39772	+	1-2997/2997	0/0	100	100	hemolysin toxin protein HlyA
hlyB		39822	41942	39822	41942	+	1-2121/2121	0/0	100	100	hemolysin transport protein HlyB
hlyD		41946	43385	41946	43385	+	1-1440/1440	0/0	100	100	hemolysin transport protein HlyD
toxB		76138	85647	76136	85645	+	1-9510/9510	0/0	100	99.98	cytotoxin ToxB
