# Supplementary material for: Pathogenomes of Shiga Toxin Positive and Negative Escherichia coli O157:H7 Strains TT12A and TT12B: Comprehensive Phylogenomic Analysis Using Closed Genomes
Source: Microorganisms. 2024 Mar 29;12(4):699. doi: 10.3390/microorganisms12040699 (PMC11052207; doi:10.3390/microorganisms12040699)
Supplement: Supplementary file 1 [file microorganisms-12-00699-s001.zip › Supplemental_Tables/ST_4_Core_genome_SNP_and_MLST_loci.xlsx]

## Sheet: ST4-1 Chromosomal_SNPs
I. SNPs within O157:H7 STEC referenced to EC4115
Reference	EC4115 position	SNP	CI	EC4115	Sakai	PA11	EDL933	TT12A	TT12B	TW11039	PA22	EC1738	EC4115	PA40	PA48	gene_name	gene_start	gene_end	gene_length	pos_in_gene	ref_codon	ref_aa	query_codon	query_aa	product	transition/transversion
CP001164	2906	NSYN	1	C	C	C	C	C	C	C	C	C	C	C	T	ECH74115_0004	2818	3751	933	89	GCA	A	GTA	V	homoserine kinase	transition
CP001164	3135	SYN	1	T	T	T	T	T	T	T	T	T	T	T	G	ECH74115_0004	2818	3751	933	318	GCT	A	GCG	A	homoserine kinase	transversion
CP001164	6065	NSYN	1	T	C	C	C	C	C	C	C	C	T	C	C	ECH74115_0007	6476	5700	777	412	GGT	G	CGT	R	conserved hypothetical protein	transition
CP001164	6674	NSYN	1	A	G	G	G	G	G	G	G	G	A	G	G	ECH74115_0008	7976	6546	1431	1303	ATA	I	GTA	V	amino acid carrier protein	transition
CP001164	10839	SYN	1	T	T	T	T	T	T	T	T	G	T	T	T	ECH74115_0012	11373	10660	714	535	GGT	G	GGT	G	conserved hypothetical protein	transversion
CP001164	14114	intergenic	1	T	A	A	A	A	A	A	A	A	T	A	A	intergenic	--	--	--	--	--	--			intergenic	transversion
CP001164	14317	NSYN	1	A	G	G	G	G	G	G	G	G	A	G	G	ECH74115_0015	14185	15316	1131	133	ACG	T	GCG	A	chaperone protein DnaJ	transition
CP001164	17613	SYN	1	T	T	T	T	T	T	T	T	T	T	T	C	ECH74115_0018	17383	18289	906	231	TTT	F	TTC	F	transcriptional activator protein NhaR	transition
CP001164	17693	NSYN	1	T	T	T	T	T	T	T	T	T	T	T	C	ECH74115_0018	17383	18289	906	311	GTA	V	GCA	A	transcriptional activator protein NhaR	transition
CP001164	18711	NSYN	1	C	A	A	A	A	A	A	C	C	C	C	C	ECH74115_0019	18853	18326	528	143	TCG	S	TAG	*	conserved hypothetical protein	transversion
CP001164	18969	intergenic	0.5	A	G	G	G	G	G	G	G	G	A	G	G	intergenic	--	--	--	--	--	--			intergenic	transition
CP001164	19849	intergenic	1	T	C	C	C	C	C	C	C	C	T	C	C	intergenic	--	--	--	--	--	--			intergenic	transition
CP001164	20239	intergenic	1	C	C	C	C	A	A	C	C	C	C	C	C	intergenic	--	--	--	--	--	--			intergenic	transversion
CP001164	22990	NSYN	1	C	C	C	C	C	C	C	C	C	C	C	T	ECH74115_0024	23028	22495	534	39	CAA	Q	CAT	H	putative fimbrial protein	transition
CP001164	23601	NSYN	1	G	G	G	G	G	G	G	G	A	G	G	G	ECH74115_0025	24751	23330	1422	1151	GGT	G	GAT	D	hypothetical protein	transition
CP001164	24011	NSYN	1	T	T	T	T	T	T	A	T	T	T	T	T	ECH74115_0025	24751	23330	1422	741	TTT	F	TTA	L	hypothetical protein	transversion
CP001164	25204	intergenic	1	C	C	C	C	C	C	C	C	T	C	C	C	intergenic	--	--	--	--	--	--			intergenic	transition
CP001164	26334	SYN	1	C	C	C	C	C	C	C	C	C	C	T	C	ECH74115_0027	25819	26761	942	516	GCC	A	GCT	A	riboflavin biosynthesis protein RibF	transition
CP001164	29352	SYN	1	G	G	G	G	G	G	G	G	A	G	G	G	ECH74115_0028	26803	29620	2817	2550	GCG	A	GCA	A	isoleucyl-tRNA synthetase	transition
CP001164	31192	SYN	1	C	C	C	C	C	C	C	C	C	C	C	T	ECH74115_0031	30652	31603	951	541	CTG	L	TTG	L	4-hydroxy-3-methylbut-2-enyl diphosphate reductase	transition
CP001164	32633	intergenic	1	T	T	T	T	T	T	T	A	T	T	T	T	intergenic	--	--	--	--	--	--			intergenic	transversion
CP001164	33604	intergenic	1	T	T	C	T	T	T	T	T	T	T	T	T	intergenic	--	--	--	--	--	--			intergenic	transition
CP001164	34764	NSYN	1	C	C	C	C	C	C	C	T	C	C	C	C	ECH74115_0035	34026	35175	1149	739	CCG	P	TCG	S	carbamoyl-phosphate synthase, small subunit	transition
CP001164	39900	SYN	1	T	T	T	T	T	T	T	T	T	T	G	G	ECH74115_0040	40677	39784	894	778	GCT	A	GCT	A	carnitinyl-CoA dehydratase	transversion
CP001164	41053	NSYN	1	C	C	C	C	C	C	C	C	A	C	C	C	ECH74115_0041	42231	40678	1554	1179	CAC	H	CAA	Q	crotonobetaine/carnitine-CoA ligase	transversion
CP001164	41108	NSYN	1	G	G	G	G	G	G	G	A	G	G	G	G	ECH74115_0041	42231	40678	1554	1124	TGG	W	TAG	*	crotonobetaine/carnitine-CoA ligase	transition
CP001164	41182	SYN	1	G	G	G	G	G	G	G	G	G	G	G	T	ECH74115_0041	42231	40678	1554	1050	GTC	V	GTT	V	crotonobetaine/carnitine-CoA ligase	transversion
CP001164	42206	NSYN	1	A	A	A	A	A	A	G	A	A	A	A	A	ECH74115_0041	42231	40678	1554	26	TAG	*	TGG	W	crotonobetaine/carnitine-CoA ligase	transition
CP001164	43135	NSYN	1	C	C	C	C	C	C	T	C	C	C	C	C	ECH74115_0042	43522	42305	1218	388	GCC	A	TCC	S	crotonobetainyl-CoA:carnitine CoA-transferase	transition
CP001164	44086	SYN	1	C	C	C	C	C	C	C	C	C	C	C	T	ECH74115_0043	44793	43651	1143	708	CTC	L	CTT	L	crotonobetainyl-CoA dehydrogenase	transition
CP001164	46374	intergenic	1	G	G	T	G	G	G	G	G	G	G	G	G	intergenic	--	--	--	--	--	--			intergenic	transversion
CP001164	47499	NSYN	1	C	C	C	C	C	C	C	C	C	C	C	T	ECH74115_0045	46749	47583	834	751	CGC	R	TGC	C	protein FixA	transition
CP001164	48268	SYN	1	G	A	A	A	A	A	A	A	A	G	G	G	ECH74115_0046	47597	48539	942	672	GAG	E	GAA	E	electron transfer flavoprotein, alpha subunit	transition
CP001164	48367	SYN	1	A	G	G	G	G	G	G	G	G	A	G	G	ECH74115_0046	47597	48539	942	771	CTA	L	CTG	L	electron transfer flavoprotein, alpha subunit	transition
CP001164	49126	NSYN	1	A	A	A	A	A	A	A	A	A	A	A	G	ECH74115_0047	48589	49876	1287	538	AAT	N	GAT	D	protein FixC	transition
CP001164	50872	NSYN	1	A	A	A	A	A	A	A	A	A	A	G	A	ECH74115_0049	50217	51549	1332	656	GAA	E	GGA	G	major facilitator family transporter	transition
CP001164	51239	NSYN	1	T	T	T	T	T	T	T	T	T	T	A	T	ECH74115_0049	50217	51549	1332	1023	TTT	F	TTA	L	major facilitator family transporter	transversion
CP001164	52204	NSYN	1	C	C	C	C	C	C	C	T	C	C	C	C	ECH74115_0051	52179	54042	1863	26	GCG	A	GTG	V	glutathione-regulated potassium-efflux system protein KefC	transition
CP001164	52448	SYN	1	C	C	C	C	C	C	C	T	C	C	C	C	ECH74115_0051	52179	54042	1863	270	GGC	G	GGT	G	glutathione-regulated potassium-efflux system protein KefC	transition
CP001164	53711	SYN	1	T	C	C	C	C	C	C	T	T	T	T	T	ECH74115_0051	52179	54042	1863	1533	GTT	V	GTC	V	glutathione-regulated potassium-efflux system protein KefC	transition
CP001164	58708	NSYN	1	A	A	A	A	A	A	A	A	A	A	A	G	ECH74115_0059	59673	58387	1287	966	AGC	S	AGG	R	chaperone/peptidyl-prolyl cis-trans isomerase SurA	transition
CP001164	59252	NSYN	1	A	A	A	A	A	A	A	A	A	A	A	G	ECH74115_0059	59673	58387	1287	422	CAC	H	CGC	R	chaperone/peptidyl-prolyl cis-trans isomerase SurA	transition
CP001164	61912	NSYN	1	T	T	T	T	T	T	T	T	T	T	T	C	ECH74115_0060	62047	59726	2322	136	GTT	V	CTT	L	LPS-assembly protein	transition
CP001164	64016	intergenic	1	A	A	A	A	A	A	A	A	C	A	A	A	intergenic	--	--	--	--	--	--			intergenic	transversion
CP001164	64512	intergenic	1	A	A	A	A	A	A	A	A	T	A	A	A	intergenic	--	--	--	--	--	--			intergenic	transversion
CP001164	64724	NSYN	1	C	C	C	C	C	C	T	C	C	C	C	C	ECH74115_0063	65259	64600	660	536	ACG	T	ATG	M	pseudouridine synthase, RluA family	transition
CP001164	68959	SYN	1	T	T	T	T	T	T	T	T	T	T	T	C	ECH74115_0065	70692	68341	2352	1734	TGC	C	TGC	C	DNA polymerase II	transition
CP001164	70663	SYN	1	T	T	T	T	T	T	T	T	T	T	T	C	ECH74115_0065	70692	68341	2352	30	TCG	S	TCC	S	DNA polymerase II	transition
CP001164	70845	SYN	1	C	C	C	C	C	C	C	C	C	C	T	C	ECH74115_0066	71462	70767	696	618	CTG	L	CTT	L	L-ribulose-5-phosphate 4-epimerase	transition
CP001164	71175	SYN	1	C	C	C	C	C	C	C	C	C	C	T	C	ECH74115_0066	71462	70767	696	288	CGT	R	CGT	R	L-ribulose-5-phosphate 4-epimerase	transition
CP001164	77754	NSYN	1	C	C	C	C	C	C	C	C	C	C	C	G	ECH74115_0072	79321	77711	1611	1568	GCT	A	GGT	G	thiamine/thiamine pyrophosphate ABC transporter, permease protein	transversion
CP001164	80632	intergenic	1	T	T	T	T	T	T	T	T	T	T	T	C	intergenic	--	--	--	--	--	--			intergenic	transition
CP001164	84289	SYN	1	T	T	T	T	T	T	T	T	T	T	C	C	ECH74115_0079	85452	84052	1401	1164	TGC	C	TGC	C	3-isopropylmalate dehydratase, large subunit	transition
CP001164	85393	NSYN	1	A	G	G	G	G	G	G	G	G	A	G	G	ECH74115_0079	85452	84052	1401	60	ATT	I	ATG	M	3-isopropylmalate dehydratase, large subunit	transition
CP001164	88682	intergenic	1	C	T	T	T	T	T	T	C	C	C	C	C	intergenic	--	--	--	--	--	--			intergenic	transition
CP001164	90033	SYN	1	G	G	G	G	G	G	G	G	G	G	G	C	ECH74115_0085	90056	89934	123	24	GGG	G	GGC	G	hypothetical protein	transversion
CP001164	92135	NSYN	1	T	T	T	T	T	T	T	T	T	T	T	C	ECH74115_0087	91913	92435	522	223	TAC	Y	CAC	H	acetolactate synthase, small subunit, isozyme III	transition
CP001164	94900	NSYN	1	T	T	T	T	T	T	T	T	T	T	C	T	ECH74115_0090	94680	95622	942	221	ATC	I	ACC	T	S-adenosyl-methyltransferase MraW	transition
CP001164	96387	NSYN	1	C	C	C	C	C	C	C	T	C	C	C	C	ECH74115_0092	95999	97766	1767	389	GCC	A	GTC	V	peptidoglycan synthetase FtsI	transition
CP001164	100172	NSYN	1	G	G	G	G	G	G	G	A	G	G	G	G	ECH74115_0094	99236	100595	1359	937	GTT	V	ATT	I	UDP-N-acetylmuramoyl-tripeptide--D-alanyl-D- alanine ligase	transition
CP001164	102462	NSYN	1	C	C	C	C	C	C	C	C	C	C	T	C	ECH74115_0096	101673	102990	1317	790	CTT	L	TTT	F	UDP-N-acetylmuramoylalanine--D-glutamate ligase	transition
CP001164	104642	NSYN	1	C	C	C	C	C	C	C	C	C	C	C	T	ECH74115_0098	104230	105298	1068	413	GCG	A	GTG	V	undecaprenyldiphospho-muramoylpentapeptide beta-N-acetylglucosaminyltransferase	transition
CP001164	117964	SYN	1	C	C	C	C	C	C	C	C	C	C	C	T	ECH74115_0111	117914	118958	1044	51	CGC	R	CGT	R	guanosine monophosphate reductase	transition
CP001164	120248	NSYN	1	A	A	G	A	A	A	A	A	A	A	A	A	ECH74115_0113	121569	120184	1386	1322	CAC	H	CGC	R	GspE family protein HofB	transition
CP001164	121032	NSYN	1	C	C	C	C	C	C	C	C	C	C	T	C	ECH74115_0113	121569	120184	1386	538	CAC	H	TAC	Y	GspE family protein HofB	transition
CP001164	125293	SYN	1	G	G	G	G	G	G	G	G	A	G	G	G	ECH74115_0118	126018	124648	1371	726	GTA	V	GTA	V	aromatic amino acid transport protein AroP	transition
CP001164	126126	intergenic	1	A	A	A	A	A	A	A	A	A	A	A	T	intergenic	--	--	--	--	--	--			intergenic	transversion
CP001164	130466	NSYN	1	A	A	A	A	A	A	A	A	A	A	C	C	ECH74115_0122	130165	132058	1893	302	GAG	E	GCG	A	dihydrolipoyllysine-residue acetyltransferase	transversion
CP001164	133753	intergenic	1	C	C	C	C	C	C	C	C	C	C	C	T	intergenic	--	--	--	--	--	--			intergenic	transition
CP001164	133881	NSYN	1	G	A	A	A	A	A	A	A	A	G	A	A	ECH74115_0124	135613	133760	1854	1733	AGC	S	AAC	N	conserved hypothetical protein	transition
CP001164	136856	NSYN	1	G	G	G	G	A	A	G	G	G	G	G	G	ECH74115_0125	135815	138566	2751	1042	GAT	D	AAT	N	aconitate hydratase 2	transition
CP001164	136964	NSYN	1	G	G	G	G	G	G	G	A	G	G	G	G	ECH74115_0125	135815	138566	2751	1150	GAC	D	AAC	N	aconitate hydratase 2	transition
CP001164	137704	SYN	1	A	A	A	A	A	A	A	A	A	A	A	G	ECH74115_0125	135815	138566	2751	1890	CTA	L	CTG	L	aconitate hydratase 2	transition
CP001164	137755	SYN	1	C	C	C	C	C	C	C	C	C	C	C	A	ECH74115_0125	135815	138566	2751	1941	ACC	T	ACA	T	aconitate hydratase 2	transversion
CP001164	142041	SYN	1	G	G	G	G	G	G	G	G	G	G	T	G	ECH74115_0130	141436	142987	1551	606	GTG	V	GTT	V	copper oxidase CueO	transversion
CP001164	142565	NSYN	1	C	T	T	T	T	T	C	C	C	C	C	C	ECH74115_0130	141436	142987	1551	1130	GCC	A	GTC	V	copper oxidase CueO	transition
CP001164	142860	SYN	1	A	C	C	C	C	C	C	A	A	A	A	A	ECH74115_0130	141436	142987	1551	1425	GTA	V	GTC	V	copper oxidase CueO	transversion
CP001164	142916	NSYN	1	G	G	G	G	G	G	G	G	G	G	G	A	ECH74115_0130	141436	142987	1551	1481	CGT	R	CAT	H	copper oxidase CueO	transition
CP001164	146203	SYN	1	G	G	G	G	G	G	G	G	G	G	G	T	ECH74115_0133	145784	146321	537	420	CCG	P	CCT	P	hypoxanthine phosphoribosyltransferase	transversion
CP001164	154155	SYN	0.5	C	C	C	C	C	C	C	A	C	C	C	C	ECH74115_0143	154173	153379	795	19	AGC	S	AGC	S	3-methyl-2-oxobutanoate hydroxymethyltransferase	transversion
CP001164	154927	NSYN	1	T	T	T	T	T	T	T	T	T	T	A	T	ECH74115_0144	155417	154308	1110	491	ATC	I	AAC	N	fimbrial protein	transversion
CP001164	155374	NSYN	1	A	A	A	A	A	A	A	A	A	A	A	G	ECH74115_0144	155417	154308	1110	44	CAC	H	CGC	R	fimbrial protein	transition
CP001164	155700	NSYN	1	G	G	G	G	G	G	G	G	G	G	G	A	ECH74115_0145	156019	155429	591	320	CGC	R	CAC	H	fimbrial protein	transition
CP001164	157712	NSYN	1	A	A	A	A	A	A	A	A	A	A	A	G	ECH74115_0148	159822	157222	2601	2111	TAG	*	TGG	W	fimbrial usher protein	transition
CP001164	158791	SYN	1	T	T	T	G	T	T	T	T	T	T	T	T	ECH74115_0148	159822	157222	2601	1032	TTG	L	TTG	L	fimbrial usher protein	transversion
CP001164	160653	intergenic	1	C	T	T	C	C	C	C	C	C	C	C	C	intergenic	--	--	--	--	--	--			intergenic	transition
CP001164	165817	NSYN	1	A	A	A	A	A	A	A	A	A	A	A	G	ECH74115_0156	166334	165804	531	518	CAC	H	CGC	R	2'-5' RNA ligase	transition
CP001164	171896	NSYN	1	C	T	T	T	T	T	T	C	C	C	C	C	ECH74115_0160	171787	174031	2244	110	CCG	P	CTG	L	ferrichrome-iron receptor	transition
CP001164	177015	SYN	1	C	C	C	C	C	C	C	C	T	C	C	C	ECH74115_0163	175765	177748	1983	1251	AAC	N	AAT	N	ferrichrome ABC transporter, permease protein FhuB	transition
CP001164	178346	SYN	1	T	T	T	T	T	T	T	T	T	T	T	C	ECH74115_0164	179062	177782	1281	717	TAC	Y	TAC	Y	glutamate-1-semialdehyde-2,1-aminomutase	transition
CP001164	180141	SYN	1	C	T	T	T	T	T	C	C	C	C	C	C	ECH74115_0165	179287	180709	1422	855	GGC	G	GGT	G	H(+)/Cl(-) exchange transporter ClcA	transition
CP001164	181554	NSYN	1	T	T	T	T	T	T	T	T	T	T	T	C	ECH74115_0167	181804	181181	624	251	GTG	V	GCG	A	putative membrane protein	transition
CP001164	182311	NSYN	1	T	T	T	T	T	T	T	T	T	T	T	C	ECH74115_0168	182642	181842	801	332	GTT	V	GCT	A	cobalamin ABC transporter, periplasmic cobalamin-binding protein	transition
CP001164	184698	SYN	1	C	T	T	T	T	T	T	T	T	C	C	C	ECH74115_0170	183417	184935	1518	1282	CTG	L	TTG	L	deoxyguanosinetriphosphate triphosphohydrolase	transition
CP001164	186091	NSYN	1	T	C	C	C	C	C	C	C	C	T	C	C	ECH74115_0171	185064	186489	1425	1028	CTG	L	CCG	P	protease Do	transition
CP001164	190557	NSYN	1	C	C	T	C	C	C	C	C	C	C	C	C	ECH74115_0175	192117	189445	2673	1561	GCC	A	TCC	S	protein-P-II uridylyltransferase	transition
CP001164	193424	SYN	1	G	G	G	A	G	G	G	G	G	G	G	G	ECH74115_0179	193341	194067	726	84	AAG	K	AAA	K	ribosomal protein S2	transition
CP001164	206352	NSYN	1	G	G	G	G	G	G	G	G	G	G	G	A	ECH74115_0191	205884	206673	789	469	GCC	A	ACC	T	acyl-[acyl-carrier-protein]-UDP-N- acetylglucosamine O-acyltransferase	transition
CP001164	206830	SYN	1	C	C	C	C	C	C	C	C	C	C	T	C	ECH74115_0192	206672	207821	1149	159	GCC	A	GCT	A	lipid-A-disaccharide synthase	transition
CP001164	207721	SYN	1	C	C	C	C	C	C	C	C	C	C	C	T	ECH74115_0192	206672	207821	1149	1050	ACC	T	ACT	T	lipid-A-disaccharide synthase	transition
CP001164	208523	NSYN	1	C	C	C	C	C	C	C	C	C	C	C	T	ECH74115_0194	208450	211933	3483	74	GCA	A	GTA	V	DNA polymerase III, alpha subunit	transition
CP001164	209550	SYN	1	T	T	T	T	T	T	T	T	T	T	T	G	ECH74115_0194	208450	211933	3483	1101	GGT	G	GGG	G	DNA polymerase III, alpha subunit	transversion
CP001164	213140	SYN	1	C	C	C	C	C	C	C	C	C	C	C	T	ECH74115_0196	213003	215145	2142	138	ATC	I	ATT	I	lysine decarboxylase, constitutive	transition
CP001164	216629	SYN	1	A	A	A	A	A	A	A	A	A	A	A	G	ECH74115_0198	215655	216951	1296	975	ACA	T	ACG	T	tRNA(Ile)-lysidine synthase	transition
CP001164	216661	NSYN	1	A	A	A	A	A	A	A	A	A	A	A	T	ECH74115_0198	215655	216951	1296	1007	CAG	Q	CTG	L	tRNA(Ile)-lysidine synthase	transversion
CP001164	218072	NSYN	1	C	T	T	T	T	T	C	C	C	C	C	C	ECH74115_0201	217616	218162	546	457	CAG	Q	TAG	*	conserved hypothetical protein	transition
CP001164	223158	NSYN	1	C	C	C	C	C	C	C	T	C	C	C	C	ECH74115_0207	223255	222902	354	98	TCG	S	TTG	L	exopolysaccharide synthesis regulator RcsF	transition
CP001164	223256	intergenic	1	G	G	G	G	G	G	A	G	G	G	G	G	intergenic	--	--	--	--	--	--			intergenic	transition
CP001164	226485	SYN	1	G	G	G	G	G	G	G	G	G	G	G	A	ECH74115_0211	226144	226720	576	342	CCG	P	CCA	P	D,D-heptose 1,7-bisphosphate phosphatase	transition
CP001164	235012	SYN	1	T	T	T	T	T	T	T	T	T	T	T	C	ECH74115_0221	234434	235235	801	579	GCT	A	GCC	A	endonuclease/exonuclease/phosphatase family protein	transition
CP001164	237605	NSYN	1	A	A	A	A	A	A	A	T	A	A	A	A	ECH74115_0224	238315	237560	756	711	AGG	R	AGT	S	hydroxyacylglutathione hydrolase	transversion
CP001164	238478	NSYN	1	T	T	T	T	T	T	T	T	T	T	T	C	ECH74115_0226	238349	239072	723	130	TAT	Y	CAT	H	putative methyltransferase	transition
CP001164	239573	intergenic	1	A	A	A	A	A	A	A	A	A	A	G	A	intergenic	--	--	--	--	--	--			intergenic	transition
CP001164	239574	intergenic	1	C	T	T	T	T	T	T	C	C	C	C	C	intergenic	--	--	--	--	--	--			intergenic	transition
CP001164	242180	intergenic	1	G	G	G	G	G	G	G	G	A	G	G	G	intergenic	--	--	--	--	--	--			intergenic	transition
CP001164	243349	intergenic	1	T	T	T	T	T	T	A	T	T	T	T	T	intergenic	--	--	--	--	--	--			intergenic	transversion
CP001164	244928	NSYN	1	G	G	G	G	G	G	G	G	G	G	G	C	ECH74115_0233	245371	243962	1410	444	GAG	E	GAC	D	ImpA domain protein	transversion
CP001164	247351	intergenic	1	T	T	T	T	T	T	T	T	T	T	T	C	intergenic	--	--	--	--	--	--			intergenic	transition
CP001164	249101	NSYN	1	G	G	G	G	G	G	G	G	A	G	G	G	ECH74115_0235	250365	248953	1413	1265	GGC	G	GAC	D	ImpA domain protein	transition
CP001164	252677	NSYN	1	C	C	C	C	T	T	C	C	C	C	C	C	ECH74115_0237	253881	251110	2772	1205	CCC	P	CTC	L	type VI secretion ATPase, ClpV1 family	transition
CP001164	253292	NSYN	1	G	G	G	G	G	G	G	G	G	G	G	T	ECH74115_0237	253881	251110	2772	590	GGC	G	GTC	V	type VI secretion ATPase, ClpV1 family	transversion
CP001164	255140	NSYN	1	G	G	G	G	G	G	G	G	G	G	A	G	ECH74115_0239	255987	254656	1332	848	GGG	G	GAG	E	conserved hypothetical protein	transition
CP001164	255185	NSYN	1	T	T	T	T	T	T	T	T	T	T	T	C	ECH74115_0239	255987	254656	1332	803	CTC	L	CCC	P	conserved hypothetical protein	transition
CP001164	256150	NSYN	1	A	A	A	A	A	A	A	A	T	A	A	A	ECH74115_0240	256514	255990	525	365	CAG	Q	CTG	L	type VI secretion lipoprotein, VC_A0113 family	transversion
CP001164	258449	SYN	1	C	C	C	C	C	C	C	C	C	C	C	T	ECH74115_0242	258898	257816	1083	450	CCA	P	CCT	P	conserved hypothetical protein	transition
CP001164	259494	NSYN	1	C	C	C	C	C	C	C	C	T	C	C	C	ECH74115_0243	260712	258862	1851	1219	GCC	A	TCC	S	conserved hypothetical protein	transition
CP001164	259722	NSYN	1	G	G	G	G	G	G	G	G	A	G	G	G	ECH74115_0243	260712	258862	1851	991	CAG	Q	AAG	K	conserved hypothetical protein	transition
CP001164	261222	intergenic	1	A	A	A	A	A	A	A	A	A	A	A	G	intergenic	--	--	--	--	--	--			intergenic	transition
CP001164	262048	intergenic	1	C	C	C	C	C	C	C	C	C	C	T	C	intergenic	--	--	--	--	--	--			intergenic	transition
CP001164	263686	intergenic	1	G	G	G	G	G	G	G	G	G	G	G	A	intergenic	--	--	--	--	--	--			intergenic	transition
CP001164	263702	intergenic	1	C	T	T	T	T	T	T	T	T	C	T	T	intergenic	--	--	--	--	--	--			intergenic	transition
CP001164	263724	intergenic	1	T	T	T	T	T	T	T	C	T	T	T	T	intergenic	--	--	--	--	--	--			intergenic	transition
CP001164	264512	NSYN	1	A	A	A	A	A	A	A	A	A	A	A	G	ECH74115_0249	264118	264637	519	395	GAC	D	GGC	G	conserved hypothetical protein	transition
CP001164	265130	SYN	1	A	G	G	G	G	G	G	G	G	G	G	G	ECH74115_0251	264846	266988	2142	285	GTA	V	GTG	V	type VI secretion system Vgr family protein	transition
CP001164	267531	NSYN	1	G	G	G	G	G	G	G	G	G	G	A	G	ECH74115_0252	267063	271296	4233	469	GCG	A	ACG	T	RHS Repeat family protein	transition
CP001164	269102	SYN	1	C	T	T	T	T	T	T	T	T	C	C	C	ECH74115_0252	267063	271296	4233	2040	GAC	D	GAT	D	RHS Repeat family protein	transition
CP001164	278690	NSYN	1	G	G	G	G	G	G	G	G	G	G	G	A	ECH74115_0261	278561	278711	150	130	GGC	G	AGC	S	hypothetical protein	transition
CP001164	279077	NSYN	1	C	C	C	C	C	C	C	C	T	C	C	C	ECH74115_0262	278758	279931	1173	320	GCA	A	GTA	V	putative transposase, IS4 family	transition
CP001164	279244	NSYN	1	G	G	G	G	G	G	G	G	A	G	G	G	ECH74115_0262	278758	279931	1173	487	GAT	D	AAT	N	putative transposase, IS4 family	transition
CP001164	282911	NSYN	1	A	A	A	A	A	A	A	A	A	A	A	C	ECH74115_0265	283932	281488	2445	1022	GAG	E	GCG	A	acyl-coenzyme A dehydrogenase	transversion
CP001164	287413	NSYN	1	A	A	A	A	A	A	A	A	T	A	A	A	ECH74115_0271	287214	287988	774	200	CAG	Q	CTG	L	NlpC/P60 family protein	transversion
CP001164	287510	SYN	1	A	A	A	A	A	A	A	A	A	A	A	G	ECH74115_0271	287214	287988	774	297	GCA	A	GCG	A	NlpC/P60 family protein	transition
CP001164	287699	SYN	1	C	C	C	C	C	C	C	C	C	C	T	C	ECH74115_0271	287214	287988	774	486	GCC	A	GCT	A	NlpC/P60 family protein	transition
CP001164	290046	NSYN	1	A	A	A	A	A	A	A	A	A	A	A	G	ECH74115_0274	290544	288805	1740	499	CGA	R	GGA	G	type III secretion protein, FHIPEP family	transition
CP001164	290344	SYN	1	G	A	A	A	A	A	G	G	G	G	G	G	ECH74115_0274	290544	288805	1740	201	GCT	A	GCA	A	type III secretion protein, FHIPEP family	transition
CP001164	290908	SYN	1	A	G	G	G	G	G	G	G	G	A	G	G	ECH74115_0275	290504	291275	771	405	GCA	A	GCG	A	putative chemotaxis protein	transition
CP001164	291330	intergenic	1	A	G	G	G	G	G	G	G	G	A	G	G	intergenic	--	--	--	--	--	--			intergenic	transition
CP001164	291771	NSYN	1	G	A	A	A	A	A	G	G	G	G	G	G	ECH74115_0276	291345	292401	1056	427	GCA	A	ACA	T	DNA polymerase IV	transition
CP001164	292312	NSYN	1	G	G	T	G	G	G	G	G	G	G	G	G	ECH74115_0276	291345	292401	1056	968	CGC	R	CTC	L	DNA polymerase IV	transversion
CP001164	293584	SYN	1	T	T	T	T	T	T	T	A	T	T	T	T	ECH74115_0279	293156	293609	453	429	TCT	S	TCA	S	acetyltransferase, GNAT family	transversion
CP001164	295416	NSYN	1	T	T	T	T	T	T	T	T	T	T	T	G	ECH74115_0282	296164	294707	1458	749	GTT	V	GGT	G	aminoacyl-histidine dipeptidase	transversion
CP001164	297481	SYN	1	A	A	A	A	A	A	A	A	A	A	A	G	ECH74115_0284	296975	298220	1245	507	CGA	R	CGG	R	fermentation-respiration switch protein	transition
CP001164	298649	NSYN	1	C	C	C	C	C	C	C	C	C	C	C	A	ECH74115_0285	298277	298679	402	373	CGT	R	AGT	S	sigma factor-binding protein Crl	transversion
CP001164	298853	NSYN	1	T	T	C	T	T	T	T	T	T	T	T	T	ECH74115_0286	299772	298717	1056	920	ATC	I	ACC	T	outer membrane pore protein E	transition
CP001164	302903	SYN	1	G	G	G	G	G	G	G	G	G	G	G	A	ECH74115_0290	303607	302633	975	705	GGC	G	GGA	G	integrase	transition
CP001164	303005	SYN	1	A	A	A	A	A	A	A	A	C	A	C	C	ECH74115_0290	303607	302633	975	603	ACC	T	ACC	T	integrase	transversion
CP001164	310912	SYN	1	A	A	A	A	A	A	A	A	G	A	G	A	ECH74115_0302	310772	311327	555	141	AAA	K	AAG	K	DNA-invertase	transition
CP001164	314221	intergenic	1	T	T	T	T	T	T	T	T	C	T	C	C	intergenic	--	--	--	--	--	--			intergenic	transition
CP001164	314629	intergenic	1	G	G	G	G	G	G	G	G	G	G	G	A	intergenic	--	--	--	--	--	--			intergenic	transition
CP001164	321763	intergenic	1	C	C	C	C	A	A	C	C	C	C	C	C	intergenic	--	--	--	--	--	--			intergenic	transversion
CP001164	322763	NSYN	1	C	C	C	C	C	C	C	C	C	C	C	A	ECH74115_0317	322551	322884	333	213	CAC	H	CAA	Q	protein ash	transversion
CP001164	322965	NSYN	1	C	C	C	C	C	C	C	T	C	C	C	C	ECH74115_0318	322880	323102	222	86	GCC	A	GTC	V	conserved hypothetical protein	transition
CP001164	324509	NSYN	1	C	C	C	C	C	C	C	T	C	C	C	C	ECH74115_0320	323438	325772	2334	1072	CGC	R	TGC	C	putative nucleoside triphosphatase, D5 family	transition
CP001164	327254	intergenic	1	A	T	T	T	T	T	T	T	T	A	T	T	intergenic	--	--	--	--	--	--			intergenic	transversion
CP001164	330915	NSYN	1	T	T	T	T	T	T	T	T	T	T	T	C	ECH74115_0326	331288	330404	885	374	CTG	L	CCG	P	LysR substrate binding domain protein	transition
CP001164	333503	NSYN	1	T	T	T	T	T	T	T	T	T	T	T	C	ECH74115_0328	332686	333880	1194	818	ATA	I	ACA	T	purine ribonucleoside efflux pump NepI	transition
CP001164	333521	NSYN	1	T	G	G	G	G	G	T	T	T	T	T	T	ECH74115_0328	332686	333880	1194	836	TTC	F	TGC	C	purine ribonucleoside efflux pump NepI	transversion
CP001164	334156	NSYN	1	C	C	C	C	C	C	C	C	C	C	C	A	ECH74115_0329	335014	334058	957	859	GGC	G	AGC	S	putative xanthine dehydrogenase accessory factor	transversion
CP001164	334890	NSYN	1	A	C	C	C	C	C	C	A	A	A	A	A	ECH74115_0329	335014	334058	957	125	CAC	H	CCC	P	putative xanthine dehydrogenase accessory factor	transversion
CP001164	335555	SYN	1	T	T	T	T	T	T	T	T	T	T	T	C	ECH74115_0330	337222	335024	2199	1668	TAT	Y	TAC	Y	xanthine dehydrogenase family protein, molybdopterin-binding subunit	transition
CP001164	336567	NSYN	1	T	T	T	T	T	T	T	T	A	T	T	T	ECH74115_0330	337222	335024	2199	656	ATC	I	AAC	N	xanthine dehydrogenase family protein, molybdopterin-binding subunit	transversion
CP001164	337464	NSYN	1	C	T	T	T	T	T	T	T	T	C	C	C	ECH74115_0331	338175	337219	957	712	GGC	G	TGC	C	FAD binding domain in molybdopterin dehydrogenase	transition
CP001164	341813	SYN	1	G	T	T	T	T	T	T	T	T	G	T	T	ECH74115_0336	343105	341462	1644	1293	GCC	A	GCT	A	conserved hypothetical protein	transversion
CP001164	344069	SYN	1	C	C	C	C	C	C	C	C	C	C	C	A	ECH74115_0337	345620	343095	2526	1552	ATC	I	ATC	I	conserved hypothetical protein	transversion
CP001164	344218	NSYN	1	G	G	G	G	G	G	G	G	T	G	G	G	ECH74115_0337	345620	343095	2526	1403	GGT	G	GTT	V	conserved hypothetical protein	transversion
CP001164	346339	intergenic	1	T	T	T	T	T	T	T	T	T	T	T	A	intergenic	--	--	--	--	--	--			intergenic	transversion
CP001164	346858	SYN	1	C	T	T	T	T	T	T	T	T	C	C	C	ECH74115_0339	346959	346372	588	102	CGA	R	CGT	R	fimbrillin MatB	transition
CP001164	346963	intergenic	1	A	A	A	A	A	A	A	A	A	A	T	A	intergenic	--	--	--	--	--	--			intergenic	transversion
CP001164	349074	intergenic	1	C	C	C	C	C	C	C	C	C	C	C	T	intergenic	--	--	--	--	--	--			intergenic	transition
CP001164	353758	intergenic	1	A	A	A	A	A	A	A	A	A	A	A	G	intergenic	--	--	--	--	--	--			intergenic	transition
CP001164	353801	intergenic	1	G	G	G	G	G	G	G	G	G	G	A	G	intergenic	--	--	--	--	--	--			intergenic	transition
CP001164	354761	intergenic	1	G	G	G	G	G	G	G	G	G	G	G	A	intergenic	--	--	--	--	--	--			intergenic	transition
CP001164	354989	NSYN	1	C	T	T	T	T	T	T	T	T	C	C	C	ECH74115_0347	354907	355834	927	83	GCT	A	GTT	V	transcriptional regulator, LysR family	transition
CP001164	355089	NSYN	1	C	C	C	C	C	C	C	C	C	C	C	G	ECH74115_0347	354907	355834	927	183	ATC	I	ATG	M	transcriptional regulator, LysR family	transversion
CP001164	356520	NSYN	1	A	A	A	A	A	A	A	A	A	A	A	G	ECH74115_0349	356508	356637	129	13	AAG	K	GAG	E	conserved hypothetical protein	transition
CP001164	357554	intergenic	1	A	A	A	A	A	A	A	A	A	A	G	A	intergenic	--	--	--	--	--	--			intergenic	transition
CP001164	358127	NSYN	1	A	A	A	A	A	A	A	G	A	A	A	A	ECH74115_0351	357811	362065	4254	317	CAG	Q	CGG	R	putative invasin	transition
CP001164	358143	NSYN	1	G	G	G	G	G	G	G	G	G	G	G	A	ECH74115_0351	357811	362065	4254	333	TGG	W	TGA	*	putative invasin	transition
CP001164	359369	NSYN	1	C	C	C	C	C	C	C	C	C	C	C	T	ECH74115_0351	357811	362065	4254	1559	TCC	S	TTC	F	putative invasin	transition
CP001164	359605	NSYN	1	C	C	C	C	C	C	C	C	C	C	T	C	ECH74115_0351	357811	362065	4254	1795	CAG	Q	TAG	*	putative invasin	transition
CP001164	359662	NSYN	1	G	G	G	G	G	G	G	G	T	G	G	G	ECH74115_0351	357811	362065	4254	1852	GGA	G	TGA	*	putative invasin	transversion
CP001164	359819	NSYN	1	G	G	T	G	G	G	G	G	G	G	G	G	ECH74115_0351	357811	362065	4254	2009	GGC	G	GTC	V	putative invasin	transversion
CP001164	361263	NSYN	1	G	G	G	G	G	G	G	G	A	G	G	G	ECH74115_0351	357811	362065	4254	3453	TGG	W	TGA	*	putative invasin	transition
CP001164	361712	NSYN	1	A	C	C	C	C	C	C	A	A	A	A	A	ECH74115_0351	357811	362065	4254	3902	AAA	K	ACA	T	putative invasin	transversion
CP001164	362194	SYN	1	A	A	A	A	A	A	A	A	A	A	A	G	ECH74115_0352	362826	362185	642	633	ACG	T	ACG	T	transcriptional regulator, AraC family	transition
CP001164	362516	NSYN	1	A	G	G	G	G	G	A	A	A	A	A	A	ECH74115_0352	362826	362185	642	311	GAT	D	GGT	G	transcriptional regulator, AraC family	transition
CP001164	367879	NSYN	1	A	A	G	A	A	A	A	A	A	A	A	G	ECH74115_0358	368004	367834	171	126	AAT	N	AAG	K	hypothetical protein	transition
CP001164	370865	NSYN	1	A	C	C	C	C	C	C	A	A	A	A	A	ECH74115_0361	370352	371048	696	514	ATC	I	CTC	L	conserved hypothetical protein	transversion
CP001164	374985	intergenic	1	T	T	T	T	T	T	T	T	T	T	T	G	intergenic	--	--	--	--	--	--			intergenic	transversion
CP001164	375211	intergenic	1	T	T	T	T	T	T	T	T	T	T	T	G	intergenic	--	--	--	--	--	--			intergenic	transversion
CP001164	375370	intergenic	1	A	A	A	A	A	A	A	A	A	A	G	A	intergenic	--	--	--	--	--	--			intergenic	transition
CP001164	376374	SYN	1	T	C	C	C	C	C	C	C	C	T	C	C	ECH74115_0372	376466	376308	159	93	TTT	F	TTC	F	hypothetical protein	transition
CP001164	376447	NSYN	1	G	G	G	G	G	G	G	G	G	G	G	A	ECH74115_0372	376466	376308	159	20	CGT	R	CAT	H	hypothetical protein	transition
CP001164	376494	intergenic	1	T	T	T	T	T	T	T	T	T	T	T	C	intergenic	--	--	--	--	--	--			intergenic	transition
CP001164	376531	intergenic	1	A	A	G	A	A	A	A	A	A	A	A	A	intergenic	--	--	--	--	--	--			intergenic	transition
CP001164	376646	intergenic	1	A	G	G	A	A	A	A	A	A	A	A	G	intergenic	--	--	--	--	--	--			intergenic	transition
CP001164	376694	intergenic	1	G	T	T	G	G	G	G	G	G	G	G	G	intergenic	--	--	--	--	--	--			intergenic	transversion
CP001164	378362	NSYN	1	G	G	G	G	G	G	G	G	G	G	T	G	ECH74115_0373	378791	377103	1689	430	CGG	R	TGG	W	choline dehydrogenase	transversion
CP001164	378704	NSYN	1	G	A	A	A	A	A	A	A	A	G	G	G	ECH74115_0373	378791	377103	1689	88	CAG	Q	AAG	K	choline dehydrogenase	transition
CP001164	380882	intergenic	1	T	T	T	T	T	T	T	T	T	T	T	C	intergenic	--	--	--	--	--	--			intergenic	transition
CP001164	383213	intergenic	1	A	A	A	A	A	A	A	A	A	A	A	G	intergenic	--	--	--	--	--	--			intergenic	transition
CP001164	383396	intergenic	1	G	A	A	A	A	A	A	G	G	G	G	G	intergenic	--	--	--	--	--	--			intergenic	transition
CP001164	384244	NSYN	1	A	A	A	A	A	A	A	A	A	A	A	T	ECH74115_0377	383548	387598	4050	697	AGG	R	TGG	W	putative outer membrane autotransporter	transversion
CP001164	384324	SYN	1	G	G	G	G	G	G	G	G	G	G	A	G	ECH74115_0377	383548	387598	4050	777	GCG	A	GCA	A	putative outer membrane autotransporter	transition
CP001164	384804	SYN	1	T	T	T	T	T	T	T	T	T	T	T	A	ECH74115_0377	383548	387598	4050	1257	GCT	A	GCA	A	putative outer membrane autotransporter	transversion
CP001164	384919	NSYN	1	G	G	G	G	G	G	G	G	G	G	G	A	ECH74115_0377	383548	387598	4050	1372	GGC	G	AGC	S	putative outer membrane autotransporter	transition
CP001164	387832	SYN	1	T	T	T	T	T	T	T	C	T	T	T	T	ECH74115_0378	387739	388828	1089	94	TTA	L	CTA	L	LuxR-family transcriptional regulator/cyclic diguanylate phosphodiesterase (EAL) domain protein	transition
CP001164	388128	SYN	1	C	C	C	C	C	C	C	C	C	C	T	C	ECH74115_0378	387739	388828	1089	390	TTC	F	TTT	F	LuxR-family transcriptional regulator/cyclic diguanylate phosphodiesterase (EAL) domain protein	transition
CP001164	388234	NSYN	1	T	T	T	T	T	T	T	T	T	T	G	T	ECH74115_0378	387739	388828	1089	496	TCC	S	GCC	A	LuxR-family transcriptional regulator/cyclic diguanylate phosphodiesterase (EAL) domain protein	transversion
CP001164	389573	intergenic	1	C	C	C	C	C	C	C	C	C	C	A	C	intergenic	--	--	--	--	--	--			intergenic	transversion
CP001164	390584	intergenic	1	C	C	C	C	C	C	C	T	C	C	C	C	intergenic	--	--	--	--	--	--			intergenic	transition
CP001164	391378	NSYN	1	C	C	C	C	C	C	C	T	C	C	C	C	ECH74115_0383	391302	392166	864	77	GCG	A	GTG	V	conserved hypothetical protein	transition
CP001164	392513	NSYN	1	C	C	C	C	C	C	C	C	C	C	C	T	ECH74115_0384	392155	393703	1548	359	TCG	S	TTG	L	bacterial FdrA protein	transition
CP001164	393801	NSYN	1	T	T	T	T	T	T	T	T	T	T	T	C	ECH74115_0385	393702	395121	1419	100	TTC	F	CTC	L	conserved hypothetical protein	transition
CP001164	394910	SYN	1	C	C	C	C	C	C	C	C	C	C	C	T	ECH74115_0385	393702	395121	1419	1209	CCC	P	CCT	P	conserved hypothetical protein	transition
CP001164	395311	NSYN	1	A	G	G	G	G	G	G	G	G	G	G	G	ECH74115_0386	395170	395467	297	142	ATC	I	GTC	V	conserved hypothetical protein	transition
CP001164	396678	SYN	1	G	G	G	G	G	G	G	A	G	G	G	G	ECH74115_0389	396595	397978	1383	84	GTG	V	GTA	V	amidohydrolase family protein	transition
CP001164	398771	intergenic	1	A	G	G	G	G	G	G	G	G	A	G	G	intergenic	--	--	--	--	--	--			intergenic	transition
CP001164	400230	NSYN	1	C	T	T	T	T	T	T	T	T	C	C	C	ECH74115_0393	399972	401457	1485	259	CAG	Q	TAG	*	sugar ABC transporter, ATP-binding protein	transition
CP001164	401736	SYN	1	T	C	C	C	C	C	C	C	C	T	C	C	ECH74115_0394	401449	402421	972	288	GGT	G	GGC	G	sugar ABC transporter, permease protein	transition
CP001164	402432	NSYN	1	C	C	C	C	C	C	C	C	C	C	C	T	ECH74115_0395	402417	403374	957	16	CGT	R	TGT	C	sugar ABC transporter, permease protein	transition
CP001164	402778	NSYN	1	T	T	T	T	T	T	T	T	T	T	T	C	ECH74115_0395	402417	403374	957	362	TTG	L	TCG	S	sugar ABC transporter, permease protein	transition
CP001164	403706	SYN	1	T	T	T	T	T	T	T	T	T	T	T	C	ECH74115_0396	403460	404510	1050	247	TTG	L	CTG	L	oxidoreductase, zinc-binding dehydrogenase family	transition
CP001164	404663	intergenic	1	C	C	C	C	C	C	T	C	C	C	C	C	intergenic	--	--	--	--	--	--			intergenic	transition
CP001164	405062	NSYN	1	C	C	C	C	C	C	C	C	C	C	T	C	ECH74115_0397	404752	405568	816	311	CCT	P	CTT	L	conserved hypothetical protein	transition
CP001164	405601	intergenic	1	T	T	T	T	T	T	T	T	T	T	T	C	intergenic	--	--	--	--	--	--			intergenic	transition
CP001164	408182	SYN	1	C	C	C	C	C	C	G	C	C	C	C	C	ECH74115_0401	409022	407436	1587	841	GAC	D	GAC	D	propionate catabolism operon regulatory protein PrpR	transversion
CP001164	408980	NSYN	1	A	A	A	A	A	A	A	A	A	A	A	T	ECH74115_0401	409022	407436	1587	43	CCA	P	TCA	S	propionate catabolism operon regulatory protein PrpR	transversion
CP001164	412914	SYN	1	C	C	C	C	C	C	T	C	C	C	C	C	ECH74115_0405	411510	412962	1452	1405	CTG	L	TTG	L	2-methylcitrate dehydratase	transition
CP001164	414037	NSYN	1	C	C	C	C	C	C	C	C	C	C	C	T	ECH74115_0406	413001	414888	1887	1037	GCT	A	GTT	V	propionate--CoA ligase	transition
CP001164	414858	NSYN	1	A	A	A	A	A	A	A	A	A	A	A	G	ECH74115_0406	413001	414888	1887	1858	AAT	N	GAT	D	propionate--CoA ligase	transition
CP001164	415420	intergenic	1	G	G	G	G	G	G	G	A	G	G	G	G	intergenic	--	--	--	--	--	--			intergenic	transition
CP001164	417173	NSYN	1	T	T	T	T	T	T	T	T	T	T	T	A	ECH74115_0410	416749	418033	1284	425	CTG	L	CAG	Q	cytosine deaminase	transversion
CP001164	420321	NSYN	1	C	C	C	C	C	C	C	C	C	C	C	T	ECH74115_0413	419864	420335	471	458	ACC	T	ATC	I	cyanate hydratase	transition
CP001164	421053	NSYN	1	C	C	C	C	C	C	C	C	C	C	A	C	ECH74115_0414	420367	421522	1155	687	AGC	S	AGA	R	cyanate transport protein CynX	transversion
CP001164	421407	NSYN	1	G	C	C	C	C	C	C	C	C	G	C	C	ECH74115_0414	420367	421522	1155	1041	AGG	R	AGC	S	cyanate transport protein CynX	transversion
CP001164	423570	intergenic	1	A	G	G	G	G	G	G	G	G	A	G	G	intergenic	--	--	--	--	--	--			intergenic	transition
CP001164	424481	NSYN	1	C	C	C	C	C	C	C	C	C	C	T	C	ECH74115_0417	426680	423606	3075	2200	CGC	R	TGC	C	beta-galactosidase	transition
CP001164	424744	NSYN	1	T	C	C	C	C	C	C	C	C	T	C	C	ECH74115_0417	426680	423606	3075	1937	ATG	M	ACG	T	beta-galactosidase	transition
CP001164	425346	SYN	1	C	T	T	T	T	T	C	C	C	C	C	C	ECH74115_0417	426680	423606	3075	1335	CAC	H	CAT	H	beta-galactosidase	transition
CP001164	430661	intergenic	1	G	G	G	G	G	G	G	G	G	G	G	A	intergenic	--	--	--	--	--	--			intergenic	transition
CP001164	433668	SYN	1	C	C	C	C	C	C	C	C	C	C	C	A	ECH74115_0424	433438	434305	867	231	GGC	G	GGA	G	2-hydroxy-6-ketonona-2,4-dienedioic acid hydrolase	transversion
CP001164	434389	SYN	1	T	C	C	C	C	C	C	C	C	T	C	C	ECH74115_0425	434314	435124	810	76	TTG	L	CTG	L	2-keto-4-pentenoate hydratase	transition
CP001164	436134	NSYN	1	G	A	A	A	A	A	A	A	A	G	A	A	ECH74115_0427	436067	437081	1014	68	CGG	R	CAG	Q	4-hydroxy-2-oxovalerate aldolase	transition
CP001164	439064	NSYN	1	G	A	A	A	A	A	A	G	G	G	G	G	ECH74115_0429	438569	439109	540	496	GAC	D	AAC	N	conserved hypothetical protein	transition
CP001164	439472	NSYN	1	G	G	G	G	G	G	G	G	G	G	C	C	ECH74115_0430	440066	439233	834	595	ATG	M	CTG	L	S-formylglutathione hydrolase	transversion
CP001164	441623	intergenic	1	C	A	A	A	A	A	A	A	C	C	C	C	intergenic	--	--	--	--	--	--			intergenic	transversion
CP001164	444878	intergenic	1	A	A	A	A	A	A	A	A	A	A	T	A	intergenic	--	--	--	--	--	--			intergenic	transversion
CP001164	445064	NSYN	1	G	G	G	G	G	G	G	G	G	G	G	T	ECH74115_0435	445974	444943	1032	911	TGG	W	TTG	L	extracellular solute-binding protein, family 1	transversion
CP001164	449268	NSYN	1	A	G	G	G	G	G	G	G	G	A	G	G	ECH74115_0438	449530	448901	630	263	GAT	D	GGT	G	transcriptional regulatory protein UhpA	transition
CP001164	450505	NSYN	1	G	T	T	T	T	T	T	T	T	G	G	G	ECH74115_0440	449833	450796	963	673	GCT	A	TCT	S	taurine ABC transporter, periplasmic taurine-binding protein	transversion
CP001164	451116	NSYN	1	A	G	G	G	G	G	G	G	G	A	G	G	ECH74115_0441	450808	451576	768	309	ATA	I	ATG	M	taurine ABC transporter, ATP-binding protein	transition
CP001164	454381	intergenic	1	T	T	T	T	T	T	T	T	T	T	T	A	intergenic	--	--	--	--	--	--			intergenic	transversion
CP001164	454878	intergenic	1	A	A	A	A	A	A	A	A	A	A	A	G	intergenic	--	--	--	--	--	--			intergenic	transition
CP001164	454917	intergenic	1	A	A	A	A	A	A	A	A	A	A	G	A	intergenic	--	--	--	--	--	--			intergenic	transition
CP001164	455781	intergenic	1	A	A	A	A	A	A	A	A	A	A	A	G	intergenic	--	--	--	--	--	--			intergenic	transition
CP001164	458563	NSYN	1	C	C	A	C	C	C	C	C	C	C	C	C	ECH74115_0448	459651	458494	1158	1089	CAT	H	CAA	Q	penicillin-binding protein AmpH	transversion
CP001164	460314	SYN	1	T	T	T	T	T	T	T	T	T	T	T	C	ECH74115_0449	460003	461224	1221	312	GTT	V	GTC	V	protein SbmA	transition
CP001164	461124	SYN	1	C	C	C	C	C	C	C	C	C	C	C	T	ECH74115_0449	460003	461224	1221	1122	ACC	T	ACT	T	protein SbmA	transition
CP001164	463618	NSYN	1	T	T	T	T	T	T	T	T	T	T	A	T	ECH74115_0453	464287	463193	1095	670	GAT	D	AAT	N	D-alanine--D-alanine ligase A	transversion
CP001164	466337	SYN	1	T	T	T	T	T	T	T	T	T	T	T	C	ECH74115_0457	465111	466527	1416	1227	ACT	T	ACC	T	alkaline phosphatase	transition
CP001164	468615	NSYN	1	A	A	A	A	A	A	A	A	A	A	A	T	ECH74115_0460	469008	468199	810	394	GGA	G	TGA	*	pyrroline-5-carboxylate reductase	transversion
CP001164	468712	SYN	1	A	A	A	A	A	A	A	A	G	A	A	A	ECH74115_0460	469008	468199	810	297	ACC	T	ACG	T	pyrroline-5-carboxylate reductase	transition
CP001164	469687	intergenic	1	A	A	A	A	A	A	G	A	A	A	A	A	intergenic	--	--	--	--	--	--			intergenic	transition
CP001164	471140	SYN	1	C	A	A	A	A	A	C	C	C	C	C	C	ECH74115_0464	470792	471470	678	349	CGG	R	AGG	R	AroM protein	transversion
CP001164	473409	NSYN	1	C	T	C	C	C	C	C	C	C	C	C	C	ECH74115_0466	472083	474249	2166	1327	CGT	R	TGT	C	hypothetical protein	transition
CP001164	476393	SYN	1	C	C	C	C	C	C	C	C	C	C	C	T	ECH74115_0469	475815	476724	909	579	TTC	F	TTT	F	manno(fructo)kinase	transition
CP001164	482707	intergenic	1	C	C	C	C	C	C	T	C	C	C	C	C	intergenic	--	--	--	--	--	--			intergenic	transition
CP001164	483242	SYN	1	T	C	C	C	C	C	C	C	C	T	C	C	ECH74115_0475	482708	483398	690	535	TTG	L	CTG	L	phosphate regulon transcriptional regulatory protein PhoB	transition
CP001164	487631	SYN	1	T	C	C	C	C	C	C	C	C	T	C	C	ECH74115_0479	486552	487926	1374	1080	ATT	I	ATC	I	proline-specific permease ProY	transition
CP001164	488256	NSYN	1	A	A	A	A	A	A	A	A	A	A	A	C	ECH74115_0480	488084	489899	1815	173	CAG	Q	CCG	P	maltodextrin glucosidase	transversion
CP001164	491302	NSYN	1	G	T	T	T	T	T	T	T	T	G	T	T	ECH74115_0483	490422	491532	1110	881	GGC	G	GTC	V	hypothetical protein	transversion
CP001164	493632	SYN	1	A	A	A	A	A	A	A	A	A	A	A	G	ECH74115_0486	493351	494479	1128	282	CAA	Q	CAG	Q	queuine tRNA-ribosyltransferase	transition
CP001164	498625	SYN	1	C	C	C	C	C	C	C	C	C	C	C	T	ECH74115_0492	498446	498794	348	180	AAC	N	AAT	N	HNH endonuclease family protein	transition
CP001164	499837	NSYN	1	C	C	C	C	C	C	C	C	C	C	T	C	ECH74115_0493	499854	498970	885	18	CAG	Q	CAT	H	nucleoside-specific channel-forming protein Tsx	transition
CP001164	502345	SYN	1	C	C	C	C	C	C	C	C	C	C	C	T	ECH74115_0496	501296	502400	1104	1050	TTC	F	TTT	F	riboflavin biosynthesis protein RibD	transition
CP001164	505450	SYN	1	C	C	C	C	C	C	C	C	C	C	C	T	ECH74115_0501	506694	505123	1572	1245	CCT	P	CCT	P	conserved hypothetical protein	transition
CP001164	505463	NSYN	1	T	T	T	T	T	T	T	T	T	T	T	C	ECH74115_0501	506694	505123	1572	1232	TTC	F	TCC	S	conserved hypothetical protein	transition
CP001164	509511	SYN	1	G	G	A	G	G	G	G	G	G	G	G	G	ECH74115_0503	509816	507954	1863	306	GCC	A	GCA	A	1-deoxy-D-xylulose-5-phosphate synthase	transition
CP001164	510990	intergenic	1	T	G	G	G	G	G	G	G	G	T	G	G	intergenic	--	--	--	--	--	--			intergenic	transversion
CP001164	511300	NSYN	1	A	A	A	A	A	A	A	A	A	A	A	T	ECH74115_0507	511188	512637	1449	113	GAT	D	GTT	V	thiamine biosynthesis/tRNA modification protein ThiI	transversion
CP001164	514585	SYN	1	C	C	C	C	C	C	C	T	C	C	C	C	ECH74115_0510	514322	514814	492	264	AGC	S	AGT	S	conserved hypothetical protein	transition
CP001164	519908	NSYN	1	A	A	A	A	A	A	A	A	A	A	A	G	ECH74115_0515	520280	518289	1992	373	CAA	Q	GAA	E	cytochrome o ubiquinol oxidase, subunit I	transition
CP001164	520436	NSYN	1	T	T	T	T	T	T	T	T	T	T	T	C	ECH74115_0516	521249	520302	948	814	GTT	V	CTT	L	cytochrome o ubiquinol oxidase, subunit II	transition
CP001164	526491	intergenic	1	T	T	T	T	T	T	T	T	T	T	T	G	intergenic	--	--	--	--	--	--			intergenic	transversion
CP001164	529254	SYN	1	G	G	G	G	G	G	G	G	G	G	G	A	ECH74115_0525	528481	530881	2400	774	GAG	E	GAA	E	ATP-dependent protease La	transition
CP001164	530445	SYN	1	T	T	T	T	T	T	T	T	T	T	T	G	ECH74115_0525	528481	530881	2400	1965	GCT	A	GCG	A	ATP-dependent protease La	transversion
CP001164	530609	NSYN	1	A	A	A	A	A	A	A	A	A	A	A	C	ECH74115_0525	528481	530881	2400	2129	AAC	N	ACC	T	ATP-dependent protease La	transversion
CP001164	531981	SYN	1	C	C	C	C	C	C	C	C	T	C	C	C	ECH74115_0527	531553	533425	1872	429	AAC	N	AAT	N	peptidylprolyl isomerase	transition
CP001164	540461	SYN	1	G	G	G	G	G	G	G	G	A	G	G	G	ECH74115_0537	540285	542067	1782	177	CTG	L	CTA	L	multidrug ABC transporter, permease/ATP-binding protein	transition
CP001164	543667	SYN	1	T	T	T	T	T	T	T	T	T	T	T	C	ECH74115_0540	542615	543902	1287	1053	ACT	T	ACC	T	ammonium transporter	transition
CP001164	545182	NSYN	1	G	G	G	G	C	C	G	G	G	G	G	G	ECH74115_0543	545043	545601	558	140	GGT	G	GCT	A	putative lipoprotein	transversion
CP001164	548204	NSYN	1	A	A	A	A	A	A	A	A	A	A	G	A	ECH74115_0547	548268	546718	1551	65	GAC	D	GGC	G	cyclic diguanylate phosphodiesterase (EAL) domain protein	transition
CP001164	552024	NSYN	1	T	G	G	G	G	G	T	T	T	T	T	T	ECH74115_0552	554054	550905	3150	2031	TGC	C	TGG	W	acriflavine resistance protein B	transversion
CP001164	552429	NSYN	1	C	C	C	C	C	C	C	C	C	C	T	C	ECH74115_0552	554054	550905	3150	1626	CAG	Q	CAT	H	acriflavine resistance protein B	transition
CP001164	553670	NSYN	1	T	T	T	T	T	T	T	T	T	T	T	C	ECH74115_0552	554054	550905	3150	385	AAT	N	CAT	H	acriflavine resistance protein B	transition
CP001164	555639	SYN	1	G	G	G	G	G	G	G	G	A	G	G	G	ECH74115_0554	555412	556060	648	228	GAG	E	GAA	E	transcriptional regulator AcrR	transition
CP001164	555658	NSYN	1	G	A	A	A	A	A	A	A	A	G	G	G	ECH74115_0554	555412	556060	648	247	GGC	G	AGC	S	transcriptional regulator AcrR	transition
CP001164	556768	SYN	1	G	G	G	G	G	G	G	G	G	G	G	T	ECH74115_0555	556193	559550	3357	576	ACG	T	ACT	T	potassium efflux system KefA	transversion
CP001164	560495	NSYN	1	T	C	C	C	C	C	C	C	C	T	C	C	ECH74115_0558	560363	560741	378	133	TGC	C	CGC	R	putative membrane protein	transition
CP001164	563978	SYN	1	A	G	G	G	G	G	G	G	G	A	G	G	ECH74115_0563	563886	564492	606	93	ACA	T	ACG	T	recombination protein RecR	transition
CP001164	569943	NSYN	1	C	C	C	C	C	C	C	C	C	C	T	C	ECH74115_0569	569502	570807	1305	442	CCG	P	TCG	S	inosine kinase	transition
CP001164	570434	SYN	1	C	C	C	C	C	C	C	C	C	C	A	C	ECH74115_0569	569502	570807	1305	933	GGC	G	GGA	G	inosine kinase	transversion
CP001164	572612	SYN	1	G	G	G	G	G	G	G	G	G	G	A	G	ECH74115_0570	572615	570939	1677	4	ATG	M	ATG	M	transporter, monovalent cation:proton antiporter-2 family	transition
CP001164	574459	NSYN	1	C	C	C	C	C	C	C	C	C	C	A	C	ECH74115_0572	574290	575943	1653	170	GCG	A	GAG	E	UDP-sugar hydrolase/5'-nucleotidase	transversion
CP001164	578366	SYN	1	C	C	C	C	C	C	C	T	C	C	C	C	ECH74115_0577	580654	578150	2505	2289	CGC	R	CGT	R	copper-exporting ATPase	transition
CP001164	578910	NSYN	1	C	C	C	C	C	C	T	C	C	C	C	C	ECH74115_0577	580654	578150	2505	1745	ACC	T	ATC	I	copper-exporting ATPase	transition
CP001164	581862	SYN	1	G	G	G	G	G	G	G	A	G	G	G	G	ECH74115_0579	581851	583144	1293	12	ACG	T	ACA	T	amino acid permease family protein	transition
CP001164	581910	SYN	1	C	C	C	C	C	C	T	C	C	C	C	C	ECH74115_0579	581851	583144	1293	60	TCC	S	TCT	S	amino acid permease family protein	transition
CP001164	582797	NSYN	1	T	G	G	G	G	G	G	G	G	T	T	T	ECH74115_0579	581851	583144	1293	947	CTA	L	CGA	R	amino acid permease family protein	transversion
CP001164	583289	intergenic	1	T	T	T	T	T	T	T	T	T	T	T	C	intergenic	--	--	--	--	--	--			intergenic	transition
CP001164	583966	SYN	1	T	C	C	C	C	C	C	C	C	T	C	C	ECH74115_0580	583481	584837	1356	486	GTT	V	GTC	V	putative outer membrane transport protein	transition
CP001164	584686	SYN	1	A	A	A	A	A	A	A	A	A	A	A	G	ECH74115_0580	583481	584837	1356	1206	GAA	E	GAG	E	putative outer membrane transport protein	transition
CP001164	585111	NSYN	1	G	A	A	A	A	A	A	A	A	G	A	A	ECH74115_0581	584939	589325	4386	173	CGG	R	CAG	Q	PKD domain protein	transition
CP001164	587200	SYN	1	C	C	C	C	C	C	C	C	C	C	C	T	ECH74115_0581	584939	589325	4386	2262	GTC	V	GTT	V	PKD domain protein	transition
CP001164	587381	NSYN	1	A	A	A	A	A	A	A	A	A	A	A	T	ECH74115_0581	584939	589325	4386	2443	AAT	N	TAT	Y	PKD domain protein	transversion
CP001164	587815	SYN	1	T	T	T	T	T	T	T	T	T	T	T	C	ECH74115_0581	584939	589325	4386	2877	ACT	T	ACC	T	PKD domain protein	transition
CP001164	588018	NSYN	1	G	G	G	G	G	G	G	G	G	G	G	A	ECH74115_0581	584939	589325	4386	3080	TGG	W	TAG	*	PKD domain protein	transition
CP001164	589322	NSYN	1	T	T	T	T	T	T	T	T	T	T	T	G	ECH74115_0581	584939	589325	4386	4384	TAG	*	GAG	E	PKD domain protein	transversion
CP001164	589528	intergenic	1	T	T	T	T	T	T	T	T	T	T	T	C	intergenic	--	--	--	--	--	--			intergenic	transition
CP001164	592701	intergenic	1	A	G	G	G	G	G	G	G	G	A	G	G	intergenic	--	--	--	--	--	--			intergenic	transition
CP001164	593736	intergenic	1	T	T	T	T	T	T	T	T	T	T	T	C	intergenic	--	--	--	--	--	--			intergenic	transition
CP001164	597644	intergenic	1	G	G	G	G	G	G	G	G	G	G	A	G	intergenic	--	--	--	--	--	--			intergenic	transition
CP001164	598060	intergenic	1	G	G	G	G	G	G	G	G	G	G	G	T	intergenic	--	--	--	--	--	--			intergenic	transversion
CP001164	600774	intergenic	1	C	C	C	C	C	C	C	C	C	C	C	T	intergenic	--	--	--	--	--	--			intergenic	transition
CP001164	602236	intergenic	1	G	T	T	T	T	T	T	T	T	T	T	T	intergenic	--	--	--	--	--	--			intergenic	transversion
CP001164	602364	intergenic	1	C	C	C	T	C	C	C	C	C	C	C	C	intergenic	--	--	--	--	--	--			intergenic	transition
CP001164	603742	intergenic	1	A	T	T	T	T	T	A	A	A	A	A	A	intergenic	--	--	--	--	--	--			intergenic	transversion
CP001164	606008	NSYN	1	T	C	C	C	C	C	C	C	C	T	C	C	ECH74115_0584	605092	607255	2163	917	CTG	L	CCG	P	type I secretion system ATPase family protein	transition
CP001164	608929	NSYN	1	C	C	C	C	C	C	C	T	C	C	C	C	ECH74115_0587	609001	608834	168	73	AAC	N	TAC	Y	hypothetical protein	transition
CP001164	610587	intergenic	1	T	T	T	T	T	T	T	T	C	T	T	T	intergenic	--	--	--	--	--	--			intergenic	transition
CP001164	610602	intergenic	1	G	G	G	G	G	G	G	G	G	G	G	A	intergenic	--	--	--	--	--	--			intergenic	transition
CP001164	610606	intergenic	1	C	C	C	C	T	T	C	C	C	C	C	C	intergenic	--	--	--	--	--	--			intergenic	transition
CP001164	614140	NSYN	1	C	C	C	C	C	C	C	C	C	C	T	C	ECH74115_0595	613647	614427	780	494	ACG	T	ATG	M	putative membrane protein	transition
CP001164	614474	intergenic	1	C	C	C	C	C	C	C	C	C	C	C	T	intergenic	--	--	--	--	--	--			intergenic	transition
CP001164	618590	NSYN	1	T	T	T	T	T	T	T	T	T	T	G	G	ECH74115_0600	617480	619895	2415	1111	TAT	Y	GAT	D	efflux ABC transporter, permease protein	transversion
CP001164	618739	SYN	1	A	G	G	G	G	G	G	G	G	A	G	G	ECH74115_0600	617480	619895	2415	1260	GTA	V	GTG	V	efflux ABC transporter, permease protein	transition
CP001164	620029	intergenic	1	A	G	G	G	G	G	G	G	G	A	A	A	intergenic	--	--	--	--	--	--			intergenic	transition
CP001164	627623	SYN	1	T	T	T	T	T	T	T	T	T	T	T	C	ECH74115_0605	628081	627155	927	459	TTC	F	TTC	F	transcriptional regulator, LysR family	transition
CP001164	628317	NSYN	1	C	C	C	C	C	C	A	C	C	C	C	C	ECH74115_0606	628311	628794	483	7	CTT	L	ATT	I	ureidoglycolate hydrolase	transversion
CP001164	629761	intergenic	1	A	G	G	G	G	G	G	G	G	A	A	A	intergenic	--	--	--	--	--	--			intergenic	transition
CP001164	629763	intergenic	1	A	G	G	G	G	G	G	A	G	A	A	A	intergenic	--	--	--	--	--	--			intergenic	transition
CP001164	631872	NSYN	1	T	T	T	T	T	T	T	T	T	T	T	A	ECH74115_0609	631570	632347	777	303	AAT	N	AAA	K	hydroxypyruvate isomerase	transversion
CP001164	635810	intergenic	1	T	T	T	T	T	T	T	T	T	T	T	C	intergenic	--	--	--	--	--	--			intergenic	transition
CP001164	635911	intergenic	1	A	T	A	A	A	A	A	A	A	A	A	A	intergenic	--	--	--	--	--	--			intergenic	transversion
CP001164	637073	NSYN	1	A	C	C	C	C	C	C	C	C	A	C	C	ECH74115_0614	636340	637642	1302	734	GAG	E	GCG	A	putative nucleobase permease	transversion
CP001164	638851	intergenic	1	G	G	G	G	G	G	G	A	G	G	G	G	intergenic	--	--	--	--	--	--			intergenic	transition
CP001164	640059	SYN	1	T	T	T	T	T	T	T	T	G	T	T	T	ECH74115_0617	641067	639832	1236	1009	GGT	G	GGT	G	allantoate amidohydrolase	transversion
CP001164	640684	SYN	1	A	A	A	A	A	A	A	A	A	A	A	G	ECH74115_0617	641067	639832	1236	384	ACC	T	ACG	T	allantoate amidohydrolase	transition
CP001164	644571	NSYN	1	G	G	G	G	G	G	G	G	G	G	G	A	ECH74115_0620	644132	645392	1260	440	CGC	R	CAC	H	conserved hypothetical protein	transition
CP001164	645113	NSYN	1	A	A	A	A	A	A	A	A	A	A	A	G	ECH74115_0620	644132	645392	1260	982	AGT	S	GGT	G	conserved hypothetical protein	transition
CP001164	647251	NSYN	1	A	A	A	A	A	A	A	A	A	A	A	T	ECH74115_0623	648313	647246	1068	1063	ACA	T	TCA	S	phosphoribosylaminoimidazole carboxylase, ATPase subunit	transversion
CP001164	649129	SYN	1	G	A	A	A	A	A	A	G	G	G	G	G	ECH74115_0625	649659	648937	723	531	GTT	V	GTA	V	UDP-2,3-diacylglucosamine hydrolase	transition
CP001164	650905	SYN	1	G	G	G	G	G	G	G	G	G	G	G	T	ECH74115_0627	650330	651716	1386	576	CCG	P	CCT	P	cysteinyl tRNA synthetase	transversion
CP001164	652171	NSYN	1	C	T	C	C	C	C	C	C	C	C	C	C	ECH74115_0628	652272	651751	522	102	CAG	Q	CAT	H	conserved hypothetical protein	transition
CP001164	654920	SYN	1	C	T	T	T	T	T	T	C	C	C	C	C	ECH74115_0632	654702	655395	693	219	TTC	F	TTT	F	chaperone protein FimC homolog	transition
CP001164	655573	NSYN	1	T	T	T	T	T	T	T	T	T	T	T	C	ECH74115_0633	655425	658035	2610	149	TTC	F	TCC	S	outer membrane usher protein SfmD	transition
CP001164	660186	SYN	1	G	A	A	A	A	A	A	A	A	G	A	A	ECH74115_0636	660215	659583	633	30	GTC	V	GTA	V	fimbriae Z protein	transition
CP001164	663418	NSYN	1	C	C	C	C	C	C	C	C	C	C	T	C	ECH74115_0641	665387	662415	2973	1970	CCA	P	CTA	L	bacteriophage N4 adsorption protein A precursor	transition
CP001164	664615	NSYN	1	G	G	G	G	G	G	G	G	G	G	C	G	ECH74115_0641	665387	662415	2973	773	GGT	G	GCT	A	bacteriophage N4 adsorption protein A precursor	transversion
CP001164	664968	NSYN	1	T	C	C	C	C	C	C	C	C	T	C	C	ECH74115_0641	665387	662415	2973	420	TTG	L	TTC	F	bacteriophage N4 adsorption protein A precursor	transition
CP001164	666185	NSYN	1	T	T	T	T	T	T	T	T	T	T	T	C	ECH74115_0642	667611	665374	2238	1427	GTC	V	GCC	A	bacteriophage N4 adsorption protein B	transition
CP001164	671278	intergenic	1	G	A	A	A	A	A	A	A	A	G	A	A	intergenic	--	--	--	--	--	--			intergenic	transition
CP001164	672085	NSYN	1	G	T	T	T	T	T	T	T	T	T	T	T	ECH74115_0647	676253	671403	4851	4169	GGC	G	GTC	V	RHS Repeat family protein	transversion
CP001164	672205	NSYN	1	C	T	T	T	T	T	T	T	T	T	T	T	ECH74115_0647	676253	671403	4851	4049	GCT	A	GTT	V	RHS Repeat family protein	transition
CP001164	672225	SYN	1	C	T	T	T	T	T	T	T	T	T	T	T	ECH74115_0647	676253	671403	4851	4029	CGT	R	CGT	R	RHS Repeat family protein	transition
CP001164	672531	SYN	1	G	G	A	G	G	G	G	G	G	G	G	A	ECH74115_0647	676253	671403	4851	3723	GTA	V	GTA	V	RHS Repeat family protein	transition
CP001164	673323	SYN	1	A	A	A	A	A	A	A	A	A	A	A	C	ECH74115_0647	676253	671403	4851	2931	AGT	S	AGC	S	RHS Repeat family protein	transversion
CP001164	674020	NSYN	1	G	G	G	G	G	G	G	G	G	G	G	T	ECH74115_0647	676253	671403	4851	2234	GGC	G	GTC	V	RHS Repeat family protein	transversion
CP001164	675868	NSYN	1	A	A	A	A	A	A	A	A	A	A	A	G	ECH74115_0647	676253	671403	4851	386	AAA	K	AGA	R	RHS Repeat family protein	transition
CP001164	676230	NSYN	1	T	T	T	T	T	T	T	T	T	T	T	C	ECH74115_0647	676253	671403	4851	24	TGG	W	TGC	C	RHS Repeat family protein	transition
CP001164	676618	SYN	1	G	T	T	T	T	T	T	T	T	G	T	T	ECH74115_0648	676734	676273	462	117	GTC	V	GTT	V	conserved hypothetical protein	transversion
CP001164	680357	NSYN	1	C	C	C	C	C	C	C	C	T	C	C	C	ECH74115_0650	680705	679257	1449	349	ATC	I	TTC	F	sensor histidine kinase CusS	transition
CP001164	684051	NSYN	1	G	G	T	G	G	G	G	G	G	G	G	G	ECH74115_0655	683289	684513	1224	763	GCC	A	TCC	S	cation efflux system protein CusB	transversion
CP001164	684234	NSYN	1	C	C	C	A	C	C	C	C	C	C	C	C	ECH74115_0655	683289	684513	1224	946	CAA	Q	AAA	K	cation efflux system protein CusB	transversion
CP001164	686480	SYN	1	C	C	C	C	C	C	C	C	C	C	C	T	ECH74115_0656	684524	687662	3138	1957	CTG	L	TTG	L	cation efflux system protein cusA	transition
CP001164	688196	NSYN	1	T	T	T	T	T	T	T	T	C	T	T	T	ECH74115_0657	687727	689140	1413	470	ATC	I	ACC	T	phenylalanine-specific permease	transition
CP001164	693920	NSYN	1	C	T	T	T	T	T	T	T	T	T	T	T	ECH74115_0664	693799	693934	135	122	TCA	S	TTA	L	hypothetical protein	transition
CP001164	696496	SYN	1	G	G	G	G	G	G	G	G	G	G	A	G	ECH74115_0667	697425	695185	2241	930	GTT	V	GTA	V	ferrienterobactin receptor	transition
CP001164	697501	SYN	1	C	C	C	C	C	C	C	C	C	C	C	T	ECH74115_0668	697418	697550	132	84	ACC	T	ACT	T	hypothetical protein	transition
CP001164	698056	NSYN	1	C	C	C	C	C	C	C	C	C	C	T	C	ECH74115_0669	697668	698871	1203	389	CCA	P	CTA	L	enterochelin esterase	transition
CP001164	699537	SYN	1	T	T	T	T	T	T	T	T	T	T	T	C	ECH74115_0671	699088	702970	3882	450	ACT	T	ACC	T	enterobactin synthetase component F	transition
CP001164	700286	NSYN	1	A	A	A	A	A	A	A	A	A	A	A	G	ECH74115_0671	699088	702970	3882	1199	CAT	H	CGT	R	enterobactin synthetase component F	transition
CP001164	700407	SYN	1	G	G	G	A	G	G	G	G	G	G	G	G	ECH74115_0671	699088	702970	3882	1320	GCG	A	GCA	A	enterobactin synthetase component F	transition
CP001164	702513	SYN	1	A	A	A	A	A	A	A	A	A	A	A	G	ECH74115_0671	699088	702970	3882	3426	ACA	T	ACG	T	enterobactin synthetase component F	transition
CP001164	702987	intergenic	1	A	A	A	C	A	A	A	A	A	A	A	A	intergenic	--	--	--	--	--	--			intergenic	transversion
CP001164	710417	NSYN	1	C	C	C	C	C	C	T	C	C	C	C	C	ECH74115_0678	709630	710806	1176	788	CCT	P	CTT	L	isochorismate synthase, entC	transition
CP001164	711584	NSYN	1	C	C	C	C	C	C	C	C	C	C	C	T	ECH74115_0679	710815	712426	1611	770	GCC	A	GTC	V	enterobactin synthetase component E	transition
CP001164	717616	SYN	1	A	A	A	A	A	A	A	A	A	A	A	C	ECH74115_0685	718221	717133	1089	606	AGC	S	AGC	S	alcohol dehydrogenase, iron-containing	transversion
CP001164	719197	NSYN	1	G	G	G	G	G	G	G	T	G	G	G	G	ECH74115_0686	718330	719491	1161	868	GCG	A	TCG	S	aminotransferase, classes I and II	transversion
CP001164	720954	SYN	1	T	T	T	T	T	T	T	T	T	T	T	C	ECH74115_0688	721313	720093	1221	360	TAC	Y	TAC	Y	IbrA protein	transition
CP001164	724516	NSYN	1	A	A	A	A	A	A	A	A	A	A	A	T	ECH74115_0692	724352	725948	1596	165	GAA	E	GAT	D	alkyl hydroperoxide reductase subunit F	transversion
CP001164	726932	SYN	1	T	T	T	T	T	T	T	T	T	T	T	C	ECH74115_0695	726717	727956	1239	216	GAT	D	GAC	D	oxidoreductase, zinc-binding dehydrogenase family	transition
CP001164	727022	SYN	1	T	C	C	C	C	C	C	C	C	T	C	C	ECH74115_0695	726717	727956	1239	306	GCT	A	GCC	A	oxidoreductase, zinc-binding dehydrogenase family	transition
CP001164	729465	SYN	1	A	A	A	A	A	A	A	A	A	A	G	A	ECH74115_0699	729632	728826	807	168	ACG	T	ACG	T	ribonuclease I	transition
CP001164	730904	NSYN	1	A	A	A	A	A	A	A	A	A	A	A	G	ECH74115_0700	731176	729746	1431	273	AGT	S	AGG	R	sodium:sulfate symporter family protein	transition
CP001164	733920	NSYN	1	A	A	A	A	A	A	A	A	A	A	A	G	ECH74115_0703	734200	732668	1533	281	GAT	D	GGT	G	citrate lyase, alpha subunit	transition
CP001164	734076	NSYN	1	C	A	C	C	C	C	C	C	C	C	C	C	ECH74115_0703	734200	732668	1533	125	GCG	A	GAG	E	citrate lyase, alpha subunit	transversion
CP001164	734985	SYN	1	G	C	C	C	C	C	C	G	G	G	G	G	ECH74115_0704	735119	734211	909	135	GTC	V	GTC	V	citrate (pro-3S)-lyase, beta subunit	transversion
CP001164	735438	SYN	1	T	T	T	T	G	G	T	T	T	T	T	T	ECH74115_0706	736485	735427	1059	1048	GGT	G	GGT	G	citrate lyase synthetase	transversion
CP001164	735699	NSYN	1	G	A	A	A	A	A	A	A	A	G	G	G	ECH74115_0706	736485	735427	1059	787	GGG	G	AGG	R	citrate lyase synthetase	transition
CP001164	736718	intergenic	1	G	A	A	A	A	A	A	A	A	G	G	G	intergenic	--	--	--	--	--	--			intergenic	transition
CP001164	737346	NSYN	1	G	G	G	G	G	G	G	G	A	G	G	G	ECH74115_0707	736865	738524	1659	482	GGC	G	GAC	D	sensor histidine kinase DpiB	transition
CP001164	737734	SYN	1	G	G	G	G	G	G	G	G	A	G	G	G	ECH74115_0707	736865	738524	1659	870	GTG	V	GTA	V	sensor histidine kinase DpiB	transition
CP001164	740406	NSYN	1	T	C	C	C	C	C	C	C	C	T	C	C	ECH74115_0709	740598	739213	1386	193	AAT	N	CAT	H	anaerobic C4-dicarboxylate transporter DcuC	transition
CP001164	740920	intergenic	1	G	A	A	A	A	A	A	A	A	G	A	A	intergenic	--	--	--	--	--	--			intergenic	transition
CP001164	740964	intergenic	1	C	C	C	C	C	C	T	C	C	C	C	C	intergenic	--	--	--	--	--	--			intergenic	transition
CP001164	741796	intergenic	1	T	C	C	C	C	C	C	C	C	T	T	T	intergenic	--	--	--	--	--	--			intergenic	transition
CP001164	745499	NSYN	1	T	T	T	T	T	T	C	T	T	T	T	T	ECH74115_0717	746009	745056	954	511	GTT	V	CTT	L	transcriptional regulator, LysR family	transition
CP001164	746599	SYN	1	C	C	C	C	C	C	C	C	C	C	C	A	ECH74115_0718	746910	746269	642	312	CAA	Q	CAA	Q	lipoyltransferase	transversion
CP001164	752980	SYN	1	C	C	C	C	C	C	C	C	C	C	T	C	ECH74115_0725	753348	752881	468	369	CGA	R	CGT	R	conserved hypothetical protein	transition
CP001164	753164	NSYN	1	G	G	G	G	G	G	A	G	G	G	G	G	ECH74115_0725	753348	752881	468	185	CGC	R	CAC	H	conserved hypothetical protein	transition
CP001164	755972	NSYN	1	T	C	C	C	C	C	C	C	C	T	C	C	ECH74115_0729	756238	755207	1032	267	TGG	W	TGC	C	DNA polymerase III, delta subunit	transition
CP001164	756271	SYN	1	C	T	T	T	T	T	T	C	C	C	C	C	ECH74115_0730	756819	756238	582	549	CGT	R	CGT	R	rare lipoprotein B family protein	transition
CP001164	758142	SYN	1	C	C	C	C	C	C	C	T	C	C	C	C	ECH74115_0731	759416	756834	2583	1275	CTG	L	CTT	L	leucyl-tRNA synthetase	transition
CP001164	760270	intergenic	1	A	A	A	A	A	A	A	A	A	A	A	C	intergenic	--	--	--	--	--	--			intergenic	transversion
CP001164	764014	NSYN	1	T	T	T	T	T	T	T	T	T	T	T	C	ECH74115_0737	764041	763487	555	28	TGT	C	CGT	R	conserved hypothetical protein	transition
CP001164	765153	intergenic	1	T	T	T	T	T	T	T	T	T	T	T	A	intergenic	--	--	--	--	--	--			intergenic	transversion
CP001164	766418	SYN	1	C	C	C	C	C	C	C	C	T	C	C	C	ECH74115_0741	768028	766358	1671	1611	CAT	H	CAT	H	DnaK family protein HscC	transition
CP001164	769357	SYN	1	C	C	C	C	C	C	C	C	C	C	T	C	ECH74115_0744	769890	769165	726	534	CAC	H	CAT	H	glutamate/aspartate ABC transporter, ATP-binding protein	transition
CP001164	771056	NSYN	1	A	G	G	G	G	G	G	G	G	A	G	G	ECH74115_0746	771304	770564	741	249	AGT	S	AGG	R	glutamate/aspartate ABC transporter, permease protein GltJ	transition
CP001164	773683	NSYN	1	C	C	C	C	C	C	C	C	C	C	C	T	ECH74115_0749	774317	772779	1539	635	CCG	P	CTG	L	apolipoprotein N-acyltransferase	transition
CP001164	774197	NSYN	1	G	G	G	G	G	G	T	G	G	G	G	G	ECH74115_0749	774317	772779	1539	121	CAG	Q	TAG	*	apolipoprotein N-acyltransferase	transversion
CP001164	775504	SYN	1	T	T	T	T	T	T	T	T	T	T	T	C	ECH74115_0752	775777	775310	468	274	CAT	H	CAT	H	conserved hypothetical protein	transition
CP001164	776191	SYN	1	A	A	A	A	A	A	A	A	A	A	A	G	ECH74115_0753	776814	775774	1041	624	ACC	T	ACG	T	PhoH family protein	transition
CP001164	777527	SYN	1	T	T	T	T	T	T	T	T	T	T	T	G	ECH74115_0755	778391	776967	1425	865	GAT	D	GAT	D	tRNA-i(6)A37 thiotransferase enzyme MiaB	transversion
CP001164	778305	SYN	1	G	G	A	G	G	G	G	G	G	G	G	G	ECH74115_0755	778391	776967	1425	87	GGT	G	GGA	G	tRNA-i(6)A37 thiotransferase enzyme MiaB	transition
CP001164	781685	NSYN	1	C	C	C	C	C	C	C	C	A	C	C	C	ECH74115_0764	782615	780951	1665	931	GTC	V	ATC	I	asparagine synthase	transversion
CP001164	781839	NSYN	1	T	T	T	T	T	T	T	T	T	T	T	A	ECH74115_0764	782615	780951	1665	777	TTC	F	TTA	L	asparagine synthase	transversion
CP001164	782802	intergenic	1	G	A	A	A	A	A	G	G	G	G	G	G	intergenic	--	--	--	--	--	--			intergenic	transition
CP001164	783358	SYN	1	A	A	A	A	A	A	A	A	A	A	A	C	ECH74115_0766	783624	782872	753	267	AAC	N	AAC	N	nagD protein	transversion
CP001164	784515	SYN	1	T	T	T	T	T	T	T	T	T	T	T	C	ECH74115_0767	784892	783672	1221	378	TTC	F	TTC	F	N-acetylglucosamine repressor	transition
CP001164	788779	NSYN	1	A	A	A	A	A	A	A	A	C	A	A	A	ECH74115_0772	787242	789189	1947	1538	GAT	D	GCT	A	PTS system, N-acetylglucosamine-specific IICBA component	transversion
CP001164	790216	SYN	1	T	T	T	T	T	T	T	T	T	T	T	C	ECH74115_0773	789391	791056	1665	826	TTG	L	CTG	L	glutaminyl-tRNA synthetase	transition
CP001164	790515	NSYN	1	G	G	G	G	G	G	G	G	G	G	A	G	ECH74115_0773	789391	791056	1665	1125	ATG	M	ATA	I	glutaminyl-tRNA synthetase	transition
CP001164	790650	SYN	1	T	A	A	A	A	A	A	A	A	T	A	A	ECH74115_0773	789391	791056	1665	1260	GCT	A	GCA	A	glutaminyl-tRNA synthetase	transversion
CP001164	792469	intergenic	1	C	T	C	C	C	C	C	C	C	C	C	C	intergenic	--	--	--	--	--	--			intergenic	transition
CP001164	792724	intergenic	1	C	C	C	C	C	C	C	C	C	C	C	T	intergenic	--	--	--	--	--	--			intergenic	transition
CP001164	792799	intergenic	1	C	C	C	C	C	C	C	C	T	C	C	C	intergenic	--	--	--	--	--	--			intergenic	transition
CP001164	792819	intergenic	1	C	C	C	C	C	C	C	C	C	C	A	C	intergenic	--	--	--	--	--	--			intergenic	transversion
CP001164	792995	intergenic	1	C	C	C	C	C	C	C	C	C	C	C	T	intergenic	--	--	--	--	--	--			intergenic	transition
CP001164	793418	intergenic	1	G	G	G	G	G	G	G	G	G	G	G	T	intergenic	--	--	--	--	--	--			intergenic	transversion
CP001164	795048	SYN	1	T	T	T	T	T	T	T	T	T	T	T	A	ECH74115_0780	795266	794904	363	219	TAG	*	TAA	*	ribbon-helix-helix protein, CopG family	transversion
CP001164	795597	NSYN	1	C	C	C	C	C	C	C	C	C	C	A	C	ECH74115_0781	796101	795337	765	505	CCC	P	ACC	T	esterase YbfF	transversion
CP001164	795842	NSYN	1	G	G	G	G	G	G	G	G	G	G	G	C	ECH74115_0781	796101	795337	765	260	AGC	S	ACC	T	esterase YbfF	transversion
CP001164	796398	NSYN	1	C	C	C	C	C	C	C	C	C	C	C	A	ECH74115_0782	796286	796832	546	113	GCA	A	GAA	E	protein SeqA	transversion
CP001164	797881	NSYN	1	C	C	C	C	C	C	C	C	C	C	C	A	ECH74115_0783	796857	798498	1641	1025	GCT	A	GAT	D	phosphoglucomutase, alpha-D-glucose phosphate-specific	transversion
CP001164	797999	SYN	1	T	C	C	C	C	C	C	C	C	T	C	C	ECH74115_0783	796857	798498	1641	1143	TTT	F	TTC	F	phosphoglucomutase, alpha-D-glucose phosphate-specific	transition
CP001164	798263	SYN	1	T	T	T	T	T	T	T	T	T	T	T	C	ECH74115_0783	796857	798498	1641	1407	AGT	S	AGC	S	phosphoglucomutase, alpha-D-glucose phosphate-specific	transition
CP001164	804824	NSYN	1	C	C	C	C	C	C	C	C	C	C	C	T	ECH74115_0788	806116	803432	2685	1293	CAG	Q	CAT	H	sensor protein KdpD	transition
CP001164	805459	NSYN	1	T	T	T	T	T	T	T	T	T	T	T	C	ECH74115_0788	806116	803432	2685	658	TTT	F	CTT	L	sensor protein KdpD	transition
CP001164	805883	NSYN	1	C	C	C	C	C	C	C	C	C	C	C	T	ECH74115_0788	806116	803432	2685	234	CAG	Q	CAT	H	sensor protein KdpD	transition
CP001164	806127	NSYN	1	C	T	T	T	T	T	T	T	T	C	C	C	ECH74115_0789	806681	806109	573	555	CAG	Q	CAT	H	K+-transporting ATPase, C subunit	transition
CP001164	806130	SYN	1	T	T	T	T	T	T	T	T	T	T	T	C	ECH74115_0789	806681	806109	573	552	TGC	C	TGC	C	K+-transporting ATPase, C subunit	transition
CP001164	810159	SYN	1	C	C	C	C	C	C	C	C	T	C	C	C	ECH74115_0791	810434	808761	1674	276	CTG	L	CTT	L	K+-transporting ATPase, A subunit	transition
CP001164	810354	NSYN	1	T	T	T	T	T	T	T	T	T	T	T	C	ECH74115_0791	810434	808761	1674	81	TAG	*	TAC	Y	K+-transporting ATPase, A subunit	transition
CP001164	810690	intergenic	1	A	G	G	G	G	G	G	G	G	A	A	A	intergenic	--	--	--	--	--	--			intergenic	transition
CP001164	816086	intergenic	1	A	A	A	A	A	A	A	A	A	A	G	A	intergenic	--	--	--	--	--	--			intergenic	transition
CP001164	816499	intergenic	1	A	A	A	A	A	A	A	A	G	A	A	A	intergenic	--	--	--	--	--	--			intergenic	transition
CP001164	816701	intergenic	1	A	A	A	A	A	A	A	A	A	A	A	G	intergenic	--	--	--	--	--	--			intergenic	transition
CP001164	823757	NSYN	1	C	C	C	C	C	C	C	T	C	C	C	C	ECH74115_0801	823511	824168	657	247	CCT	P	TCT	S	allophanate hydrolase, subunit 1	transition
CP001164	824479	NSYN	1	C	C	C	C	C	C	C	C	T	C	C	C	ECH74115_0802	824161	825094	933	319	CAC	H	TAC	Y	allophanate hydrolase, subunit 2	transition
CP001164	824623	NSYN	1	G	G	G	G	G	G	G	G	G	G	G	T	ECH74115_0802	824161	825094	933	463	GCG	A	TCG	S	allophanate hydrolase, subunit 2	transversion
CP001164	825031	NSYN	1	T	G	G	G	G	G	G	G	G	T	G	G	ECH74115_0802	824161	825094	933	871	TCG	S	GCG	A	allophanate hydrolase, subunit 2	transversion
CP001164	826013	intergenic	1	C	C	C	C	C	C	C	C	C	C	G	C	intergenic	--	--	--	--	--	--			intergenic	transversion
CP001164	826234	intergenic	1	C	C	C	C	C	C	C	C	C	C	C	T	intergenic	--	--	--	--	--	--			intergenic	transition
CP001164	826653	NSYN	1	T	T	T	T	T	T	T	C	T	T	T	T	ECH74115_0804	827686	826640	1047	1034	TTT	F	TCT	S	protein AbrB	transition
CP001164	826723	SYN	1	T	G	G	G	G	G	T	T	T	T	T	T	ECH74115_0804	827686	826640	1047	964	GGT	G	GGT	G	protein AbrB	transversion
CP001164	828760	NSYN	1	G	A	A	A	A	A	A	A	A	G	A	A	ECH74115_0806	828896	827835	1062	137	AGC	S	AAC	N	conserved hypothetical protein	transition
CP001164	829125	NSYN	1	G	G	G	G	G	G	G	G	G	G	G	T	ECH74115_0807	829624	828893	732	500	GGT	G	GTT	V	periplasmic pilus chaperone family protein	transversion
CP001164	829243	NSYN	1	C	C	C	C	C	C	C	A	C	C	C	C	ECH74115_0807	829624	828893	732	382	GGC	G	AGC	S	periplasmic pilus chaperone family protein	transversion
CP001164	829928	NSYN	1	C	T	T	T	T	T	T	C	C	C	C	C	ECH74115_0808	832089	829639	2451	2162	CCA	P	CTA	L	fimbrial usher protein	transition
CP001164	831205	NSYN	1	T	T	T	T	T	T	T	T	T	T	T	C	ECH74115_0808	832089	829639	2451	885	TGG	W	TGC	C	fimbrial usher protein	transition
CP001164	833003	intergenic	1	A	C	C	C	C	C	C	C	C	A	C	C	intergenic	--	--	--	--	--	--			intergenic	transversion
CP001164	837265	SYN	1	T	T	T	T	T	T	T	T	T	T	T	G	ECH74115_0815	835823	837590	1767	1443	GCT	A	GCG	A	succinate dehydrogenase, flavoprotein subunit	transversion
CP001164	841255	SYN	1	T	C	C	C	C	C	C	C	C	T	C	C	ECH74115_0818	838622	841424	2802	2634	AAT	N	AAC	N	oxoglutarate dehydrogenase (succinyl-transferring), E1 component	transition
CP001164	844794	intergenic	1	A	A	A	A	A	A	A	A	G	A	A	A	intergenic	--	--	--	--	--	--			intergenic	transition
CP001164	845587	NSYN	1	A	A	A	A	A	A	A	A	A	A	A	G	ECH74115_0823	845451	846357	906	137	GAA	E	GGA	G	transcriptional regulator, LysR family	transition
CP001164	846421	NSYN	1	C	C	C	C	C	C	C	C	C	C	A	C	ECH74115_0824	846992	846390	603	572	GCC	A	GAC	D	cob(I)yrinic acid a,c-diamide adenosyltransferase	transversion
CP001164	847819	NSYN	1	C	C	C	C	C	C	C	T	C	C	C	C	ECH74115_0825	848654	847002	1653	836	ACT	T	ATT	I	hydro-lyase, Fe-S type, tartrate/fumarate family	transition
CP001164	850776	NSYN	1	A	A	A	A	A	A	A	A	A	A	T	A	ECH74115_0828	851887	850517	1371	1112	CAG	Q	CTG	L	conserved hypothetical protein	transversion
CP001164	851793	NSYN	1	T	T	T	T	T	T	T	T	T	T	G	T	ECH74115_0828	851887	850517	1371	95	ATC	I	AGC	S	conserved hypothetical protein	transversion
CP001164	851988	NSYN	1	G	C	C	C	C	C	C	C	C	G	C	C	ECH74115_0829	853132	851891	1242	1145	AGG	R	ACG	T	methylaspartate ammonia-lyase	transversion
CP001164	853204	SYN	1	G	G	G	G	G	G	G	G	G	G	G	A	ECH74115_0830	854577	853132	1446	1374	GCG	A	GCA	A	methylaspartate mutase, E subunit	transition
CP001164	853593	SYN	1	C	C	C	C	C	C	C	C	C	C	T	C	ECH74115_0830	854577	853132	1446	985	TTC	F	TTC	F	methylaspartate mutase, E subunit	transition
CP001164	856591	intergenic	1	G	G	G	G	G	G	G	G	G	G	G	A	intergenic	--	--	--	--	--	--			intergenic	transition
CP001164	857201	NSYN	1	T	T	T	T	T	T	T	T	T	T	G	T	ECH74115_0833	857280	856981	300	80	ATC	I	AGC	S	hypothetical protein	transversion
CP001164	857242	SYN	1	C	C	C	C	C	C	T	C	C	C	C	C	ECH74115_0833	857280	856981	300	39	CGG	R	CGT	R	hypothetical protein	transition
CP001164	857556	NSYN	1	G	G	G	G	G	G	G	G	G	G	G	A	ECH74115_0834	858312	857485	828	757	GCG	A	ACG	T	hypothetical protein	transition
CP001164	862436	intergenic	1	C	C	C	T	C	C	C	C	C	C	C	C	intergenic	--	--	--	--	--	--			intergenic	transition
CP001164	864616	SYN	1	C	C	C	C	C	C	T	C	C	C	C	C	ECH74115_0842	864119	865394	1275	498	GAC	D	GAT	D	protein TolA	transition
CP001164	865654	SYN	1	G	G	G	G	G	G	G	G	G	G	G	A	ECH74115_0843	865526	866819	1293	129	CAG	Q	CAA	Q	tol-Pal system beta propeller repeat protein TolB	transition
CP001164	865804	SYN	1	G	G	G	G	G	G	G	G	G	G	G	T	ECH74115_0843	865526	866819	1293	279	GCG	A	GCT	A	tol-Pal system beta propeller repeat protein TolB	transversion
CP001164	866193	NSYN	1	G	G	G	G	A	A	G	G	G	G	G	G	ECH74115_0843	865526	866819	1293	668	CGT	R	CAT	H	tol-Pal system beta propeller repeat protein TolB	transition
CP001164	869726	SYN	1	T	C	C	C	C	C	C	C	C	T	C	C	ECH74115_0852	869319	870354	1035	408	TAT	Y	TAC	Y	quinolinate synthetase complex, A subunit	transition
CP001164	871105	NSYN	1	C	C	C	C	C	C	C	C	C	C	C	A	ECH74115_0854	870391	871111	720	715	CAT	H	AAT	N	nicotinamide mononucleotide transporter PnuC	transversion
CP001164	872395	NSYN	1	G	G	G	G	G	G	T	G	G	G	G	G	ECH74115_0855	872542	872162	381	148	ACG	T	TCG	S	conserved hypothetical protein	transversion
CP001164	877450	SYN	1	C	C	C	C	C	C	C	C	C	C	C	T	ECH74115_0861	878262	877216	1047	813	CTG	L	CTT	L	galactose-1-phosphate uridylyltransferase	transition
CP001164	878456	NSYN	1	C	T	T	T	T	T	T	T	T	C	T	T	ECH74115_0862	879288	878272	1017	833	TCT	S	TTT	F	UDP-glucose 4-epimerase	transition
CP001164	881291	SYN	1	C	C	C	C	C	C	C	C	T	C	C	C	ECH74115_0864	881878	881090	789	588	CGC	R	CGT	R	transcriptional regulator ModE	transition
CP001164	882949	SYN	1	C	C	C	C	C	C	C	C	C	C	C	T	ECH74115_0866	882323	883097	774	627	ACC	T	ACT	T	molybdate ABC transporter, periplasmic molybdate-binding protein	transition
CP001164	884528	SYN	1	G	G	G	G	G	G	G	T	G	G	G	G	ECH74115_0868	883788	884847	1059	741	GCG	A	GCT	A	molybdate ABC transporter, ATP-binding protein	transversion
CP001164	886094	NSYN	1	A	A	A	A	A	A	A	A	A	A	T	A	ECH74115_0870	885820	886816	996	275	CAG	Q	CTG	L	6-phosphogluconolactonase	transversion
CP001164	887789	SYN	1	A	A	A	A	A	A	A	A	A	A	G	A	ECH74115_0871	887809	886856	954	21	ACT	T	ACG	T	transcriptional regulator, LysR family	transition
CP001164	892312	NSYN	1	G	G	G	G	G	G	G	G	G	G	G	T	ECH74115_0875	890737	892999	2262	1576	GAC	D	TAC	Y	aconitase family protein	transversion
CP001164	892494	NSYN	1	C	C	C	C	C	C	C	C	C	C	A	A	ECH74115_0875	890737	892999	2262	1758	AGC	S	AGA	R	aconitase family protein	transversion
CP001164	895545	NSYN	1	T	T	T	T	T	T	T	T	T	T	T	C	ECH74115_0877	895627	894557	1071	83	GTC	V	GCC	A	phage integrase family protein	transition
CP001164	902275	intergenic	1	G	G	G	G	G	G	G	G	G	G	G	A	intergenic	--	--	--	--	--	--			intergenic	transition
CP001164	926450	NSYN	1	A	T	A	T	T	T	T	T	T	A	T	A	ECH74115_0915	926222	927539	1317	229	ACC	T	TCC	S	tail fiber protein	transversion
CP001164	930687	intergenic	1	C	C	C	C	C	C	C	C	C	C	A	C	intergenic	--	--	--	--	--	--			intergenic	transversion
CP001164	931579	NSYN	1	A	G	G	G	G	G	G	G	G	A	G	G	ECH74115_0919	930847	931729	882	733	ATC	I	GTC	V	non-LEE-encoded effector NleH	transition
CP001164	932002	intergenic	1	G	G	G	G	G	G	G	G	G	G	G	C	intergenic	--	--	--	--	--	--			intergenic	transversion
CP001164	932542	intergenic	1	A	A	A	A	A	A	A	A	A	A	A	G	intergenic	--	--	--	--	--	--			intergenic	transition
CP001164	932991	intergenic	1	C	C	C	C	C	C	C	C	C	C	C	T	intergenic	--	--	--	--	--	--			intergenic	transition
CP001164	933023	intergenic	1	A	A	A	A	A	A	G	A	A	A	A	A	intergenic	--	--	--	--	--	--			intergenic	transition
CP001164	933054	intergenic	1	G	G	G	G	G	G	G	G	G	G	G	A	intergenic	--	--	--	--	--	--			intergenic	transition
CP001164	934014	SYN	1	C	C	C	C	C	C	C	A	C	C	C	C	ECH74115_0922	935099	933699	1401	1086	CGC	R	CGA	R	adenosylmethionine-8-amino-7-oxononanoate transaminase	transversion
CP001164	934772	NSYN	1	C	C	C	C	C	C	C	C	C	C	T	C	ECH74115_0922	935099	933699	1401	328	ATC	I	TTC	F	adenosylmethionine-8-amino-7-oxononanoate transaminase	transition
CP001164	937240	SYN	1	C	T	T	T	T	T	T	C	C	C	C	C	ECH74115_0924	936112	937267	1155	1129	CTG	L	TTG	L	8-amino-7-oxononanoate synthase	transition
CP001164	938611	NSYN	1	T	G	G	G	G	G	G	G	G	T	T	T	ECH74115_0926	938001	938679	678	611	ATC	I	AGC	S	dethiobiotin synthase	transversion
CP001164	942572	intergenic	1	G	G	G	G	G	G	G	G	G	G	G	T	intergenic	--	--	--	--	--	--			intergenic	transversion
CP001164	944383	SYN	1	G	G	G	G	G	G	G	G	G	G	G	T	ECH74115_0931	944300	944786	486	84	GCG	A	GCT	A	molybdenum cofactor biosynthesis protein C	transversion
CP001164	945013	NSYN	1	G	C	C	C	C	C	C	C	C	G	C	C	ECH74115_0932	944778	945024	246	236	AGC	S	ACC	T	molybdopterin converting factor, subunit 1	transversion
CP001164	945257	NSYN	1	G	T	T	T	T	T	T	T	T	G	G	G	ECH74115_0933	945025	945478	453	233	CGC	R	CTC	L	molybdopterin converting factor, subunit 2	transversion
CP001164	945313	NSYN	1	A	A	A	A	A	A	A	A	A	A	A	G	ECH74115_0933	945025	945478	453	289	ATC	I	GTC	V	molybdopterin converting factor, subunit 2	transition
CP001164	946295	NSYN	1	G	G	G	G	G	G	G	G	G	G	G	A	ECH74115_0934	945613	946318	705	683	CGA	R	CAA	Q	putative membrane protein	transition
CP001164	946446	intergenic	1	T	T	T	T	T	T	T	G	T	T	T	T	intergenic	--	--	--	--	--	--			intergenic	transversion
CP001164	946576	NSYN	1	A	A	A	A	A	A	A	A	A	A	A	T	ECH74115_0935	946525	947239	714	52	AGG	R	TGG	W	putative membrane protein	transversion
CP001164	946578	SYN	1	G	G	G	G	G	G	G	G	G	G	G	A	ECH74115_0935	946525	947239	714	54	AGG	R	AGA	R	putative membrane protein	transition
CP001164	949557	NSYN	1	T	C	C	C	C	C	C	C	C	T	C	C	ECH74115_0938	950229	949468	762	673	GGT	G	CGT	R	endonuclease/exonuclease/phosphatase family protein	transition
CP001164	954306	SYN	1	C	C	C	C	C	C	C	C	C	C	T	C	ECH74115_0942	954713	952977	1737	408	CGC	R	CGT	R	ABC transporter, ATP-binding protein	transition
CP001164	955753	NSYN	1	G	G	G	G	G	G	G	G	A	G	G	G	ECH74115_0944	956375	955704	672	623	GGT	G	GAT	D	transcriptional regulator, TetR family	transition
CP001164	960624	intergenic	1	T	T	T	T	T	T	T	A	T	T	T	T	intergenic	--	--	--	--	--	--			intergenic	transversion
CP001164	961963	SYN	1	G	T	T	T	T	T	T	G	G	G	G	G	ECH74115_0948	960737	963026	2289	1227	GCG	A	GCT	A	putative ATP-dependent helicase DinG	transversion
CP001164	962529	NSYN	1	A	A	A	A	A	A	A	A	A	A	A	G	ECH74115_0948	960737	963026	2289	1793	GAC	D	GGC	G	putative ATP-dependent helicase DinG	transition
CP001164	963959	NSYN	1	A	A	A	A	A	A	A	A	A	A	A	G	ECH74115_0949	963053	964016	963	907	ACG	T	GCG	A	glycosyl transferase family protein	transition
CP001164	964488	SYN	1	T	T	T	T	T	T	T	T	T	T	T	C	ECH74115_0950	964156	965242	1086	333	GCT	A	GCC	A	malate/L-lactate dehydrogenase	transition
CP001164	965192	NSYN	1	G	G	G	G	G	G	G	A	G	G	G	G	ECH74115_0950	964156	965242	1086	1037	GGT	G	GAT	D	malate/L-lactate dehydrogenase	transition
CP001164	965876	intergenic	1	C	C	C	C	C	C	C	C	T	C	C	C	intergenic	--	--	--	--	--	--			intergenic	transition
CP001164	965978	intergenic	1	C	C	C	C	C	C	C	C	C	C	C	T	intergenic	--	--	--	--	--	--			intergenic	transition
CP001164	966000	NSYN	1	A	G	G	G	G	G	G	G	G	A	G	G	ECH74115_0952	966261	965995	267	262	ACA	T	GCA	A	C4-type zinc finger protein, DksA/TraR family	transition
CP001164	966082	SYN	1	A	A	A	A	A	A	A	A	A	A	A	G	ECH74115_0952	966261	965995	267	180	ACA	T	ACG	T	C4-type zinc finger protein, DksA/TraR family	transition
CP001164	966192	NSYN	1	C	C	C	C	C	C	T	C	C	C	C	C	ECH74115_0952	966261	965995	267	70	GGC	G	TGC	C	C4-type zinc finger protein, DksA/TraR family	transition
CP001164	966289	intergenic	1	T	T	T	T	T	T	T	T	T	T	T	C	intergenic	--	--	--	--	--	--			intergenic	transition
CP001164	967206	NSYN	1	T	T	T	T	T	T	T	T	T	T	T	G	ECH74115_0954	969345	967063	2283	2140	CCT	P	GCT	A	catecholate siderophore receptor Fiu	transversion
CP001164	967220	NSYN	1	G	G	G	G	G	G	G	G	A	G	G	G	ECH74115_0954	969345	967063	2283	2126	GGC	G	GAC	D	catecholate siderophore receptor Fiu	transition
CP001164	968194	SYN	1	C	T	T	T	T	T	T	C	C	C	C	C	ECH74115_0954	969345	967063	2283	1152	CGT	R	CGT	R	catecholate siderophore receptor Fiu	transition
CP001164	968805	NSYN	1	A	A	A	A	A	A	A	A	A	A	A	C	ECH74115_0954	969345	967063	2283	541	GGA	G	CGA	R	catecholate siderophore receptor Fiu	transversion
CP001164	970746	NSYN	1	T	T	T	T	T	T	T	T	T	T	C	C	ECH74115_0957	970146	971073	927	601	TGT	C	CGT	R	conserved hypothetical protein	transition
CP001164	970783	NSYN	1	C	C	C	C	C	C	T	C	C	C	C	C	ECH74115_0957	970146	971073	927	638	GCA	A	GTA	V	conserved hypothetical protein	transition
CP001164	972304	SYN	1	G	G	G	G	G	G	G	G	G	G	A	G	ECH74115_0956	973294	971069	2226	991	ATG	M	ATG	M	transporter, small conductance mechanosensitive ion channel (MscS) family	transition
CP001164	972481	NSYN	1	C	C	C	C	C	C	C	C	C	C	C	T	ECH74115_0956	973294	971069	2226	814	GCC	A	TCC	S	transporter, small conductance mechanosensitive ion channel (MscS) family	transition
CP001164	975826	intergenic	1	C	C	C	A	C	C	C	C	C	C	C	C	intergenic	--	--	--	--	--	--			intergenic	transversion
CP001164	977806	intergenic	1	A	A	A	A	A	A	A	A	A	A	T	A	intergenic	--	--	--	--	--	--			intergenic	transversion
CP001164	979927	NSYN	1	G	G	G	A	G	G	G	G	G	G	G	G	ECH74115_0964	980266	978683	1584	340	CAG	Q	AAG	K	sulfatase family protein	transition
CP001164	981326	NSYN	1	C	C	C	C	C	C	C	C	T	C	C	C	ECH74115_0967	981316	982435	1119	11	CCT	P	CTT	L	citrate transporter family protein	transition
CP001164	986690	intergenic	1	G	G	G	G	G	G	G	G	A	G	G	G	intergenic	--	--	--	--	--	--			intergenic	transition
CP001164	986732	intergenic	1	C	C	C	C	C	C	C	C	C	C	C	A	intergenic	--	--	--	--	--	--			intergenic	transversion
CP001164	988149	intergenic	1	G	T	T	T	T	T	T	T	T	G	T	T	intergenic	--	--	--	--	--	--			intergenic	transversion
CP001164	990820	SYN	1	A	A	A	A	A	A	A	A	A	A	A	C	ECH74115_0974	991105	990206	900	286	CGA	R	CGA	R	glycyl-radical enzyme activating protein	transversion
CP001164	991481	SYN	1	C	C	C	C	C	C	C	C	C	C	C	A	ECH74115_0975	991236	991899	663	246	ATC	I	ATA	I	fructose-6-phosphate aldolase 1	transversion
CP001164	992276	NSYN	1	A	G	G	G	G	G	G	G	G	A	G	G	ECH74115_0976	992826	992077	750	551	CAC	H	CGC	R	molybdopterin synthase sulfurylase MoeB	transition
CP001164	995002	intergenic	1	C	C	C	C	C	C	C	T	C	C	C	C	intergenic	--	--	--	--	--	--			intergenic	transition
CP001164	996185	SYN	1	C	T	T	T	T	T	T	T	T	C	C	C	ECH74115_0980	995199	997089	1890	987	TTC	F	TTT	F	glutathione ABC transporter, ATP-binding protein GsiA	transition
CP001164	1001082	NSYN	1	A	A	A	A	A	A	A	A	A	A	A	G	ECH74115_0984	1000676	1003025	2349	407	CAG	Q	CGG	R	cyclic diguanylate phosphodiesterase (EAL) domain protein	transition
CP001164	1001633	NSYN	1	A	A	A	A	A	A	A	A	A	A	A	G	ECH74115_0984	1000676	1003025	2349	958	ATT	I	GTT	V	cyclic diguanylate phosphodiesterase (EAL) domain protein	transition
CP001164	1002118	SYN	1	C	C	C	C	C	C	C	C	C	C	C	T	ECH74115_0984	1000676	1003025	2349	1443	GCC	A	GCT	A	cyclic diguanylate phosphodiesterase (EAL) domain protein	transition
CP001164	1002944	NSYN	1	G	G	G	G	G	G	G	G	A	G	G	G	ECH74115_0984	1000676	1003025	2349	2269	GTT	V	ATT	I	cyclic diguanylate phosphodiesterase (EAL) domain protein	transition
CP001164	1004174	SYN	1	G	A	A	A	A	A	G	G	G	G	G	G	ECH74115_0985	1003119	1004361	1242	1056	ACG	T	ACA	T	diguanylate cyclase	transition
CP001164	1005113	NSYN	1	C	C	C	C	C	C	C	C	C	C	C	T	ECH74115_0987	1005135	1004749	387	23	TCG	S	TTG	L	conserved hypothetical protein	transition
CP001164	1005759	NSYN	1	C	C	C	C	C	C	C	C	T	C	C	C	ECH74115_0988	1006686	1005361	1326	928	GCC	A	TCC	S	MiaB-like tRNA modifying enzyme YliG	transition
CP001164	1007970	NSYN	1	C	C	C	C	C	C	C	C	T	C	C	C	ECH74115_0991	1007393	1008509	1116	578	CCG	P	CTG	L	glucose / sorbosone dehydrogenase protein	transition
CP001164	1010623	intergenic	1	T	T	T	T	T	T	T	T	T	T	T	C	intergenic	--	--	--	--	--	--			intergenic	transition
CP001164	1011333	NSYN	1	G	G	G	G	G	G	G	A	G	G	G	G	ECH74115_0993	1011384	1010626	759	52	GCG	A	ACG	T	deoxyribose operon repressor	transition
CP001164	1012815	NSYN	1	A	A	A	A	A	A	A	C	A	A	A	A	ECH74115_0995	1012323	1013556	1233	493	ATC	I	CTC	L	multidrug translocase MdfA	transversion
CP001164	1018497	intergenic	1	G	A	A	A	A	A	A	G	G	G	G	G	intergenic	--	--	--	--	--	--			intergenic	transition
CP001164	1018521	intergenic	1	T	C	C	C	C	C	C	C	C	T	C	C	intergenic	--	--	--	--	--	--			intergenic	transition
CP001164	1018628	intergenic	1	C	C	C	T	C	C	C	C	C	C	C	C	intergenic	--	--	--	--	--	--			intergenic	transition
CP001164	1020458	NSYN	1	C	C	C	C	C	C	C	C	C	C	C	T	ECH74115_1005	1019834	1020557	723	625	CGG	R	TGG	W	oxygen-insensitive NADPH nitroreductase	transition
CP001164	1020983	NSYN	1	C	C	C	C	C	C	C	T	C	C	C	C	ECH74115_1006	1020617	1021520	903	367	CCG	P	TCG	S	ribosomal protein S6 modification protein	transition
CP001164	1021554	intergenic	1	T	T	T	T	T	T	T	T	T	T	T	G	intergenic	--	--	--	--	--	--			intergenic	transversion
CP001164	1021585	intergenic	1	T	T	T	T	T	T	T	A	T	T	T	T	intergenic	--	--	--	--	--	--			intergenic	transversion
CP001164	1022113	NSYN	1	G	G	G	G	G	G	G	G	G	G	A	G	ECH74115_1008	1022040	1022163	123	74	TGC	C	TAC	Y	hypothetical protein	transition
CP001164	1026322	NSYN	1	G	G	G	G	G	G	G	G	G	G	G	A	ECH74115_1013	1025734	1026580	846	589	GTC	V	ATC	I	putrescine ABC transporter, permease protein PotI	transition
CP001164	1026468	SYN	1	A	A	A	A	A	A	A	A	A	A	A	G	ECH74115_1013	1025734	1026580	846	735	CTA	L	CTG	L	putrescine ABC transporter, permease protein PotI	transition
CP001164	1027330	NSYN	1	T	T	T	T	T	T	T	G	T	T	T	T	ECH74115_1015	1027168	1028296	1128	163	TTT	F	GTT	V	23S rRNA (uracil-5-)-methyltransferase RumB	transversion
CP001164	1032086	SYN	1	C	C	C	C	C	C	C	C	A	C	C	C	ECH74115_1019	1032535	1031804	732	450	CGT	R	CGA	R	arginine ABC transporter, periplasmic arginine-binding protein ArtJ	transversion
CP001164	1033710	SYN	1	G	A	A	A	A	A	A	A	A	G	G	G	ECH74115_1022	1034210	1033494	717	501	GTT	V	GTA	V	arginine ABC transporter, permease protein ArtQ	transition
CP001164	1034958	intergenic	1	C	C	C	C	C	C	C	C	C	C	A	C	intergenic	--	--	--	--	--	--			intergenic	transversion
CP001164	1035935	NSYN	1	G	G	G	G	G	G	G	G	G	G	T	G	ECH74115_1025	1036427	1035912	516	493	ACG	T	TCG	S	putative lipoprotein	transversion
CP001164	1036273	NSYN	1	T	T	T	T	T	T	T	T	T	T	T	C	ECH74115_1025	1036427	1035912	516	155	GTG	V	GCG	A	putative lipoprotein	transition
CP001164	1038987	intergenic	1	C	C	C	C	C	C	C	C	C	C	C	T	intergenic	--	--	--	--	--	--			intergenic	transition
CP001164	1040597	SYN	1	C	C	C	C	C	C	C	C	C	C	C	T	ECH74115_1028	1041257	1040208	1050	661	TTC	F	TTC	F	NAD dependent epimerase/dehydratase family protein	transition
CP001164	1040931	NSYN	1	T	T	T	T	T	T	T	T	T	T	T	C	ECH74115_1028	1041257	1040208	1050	327	TAG	*	TAC	Y	NAD dependent epimerase/dehydratase family protein	transition
CP001164	1042836	NSYN	1	C	C	C	C	C	C	C	T	C	C	C	C	ECH74115_1031	1043762	1042761	1002	927	CAG	Q	CAT	H	low-specificity L-threonine aldolase	transition
CP001164	1043213	NSYN	1	G	G	G	G	G	G	G	G	G	G	G	T	ECH74115_1031	1043762	1042761	1002	550	GAG	E	TAG	*	low-specificity L-threonine aldolase	transversion
CP001164	1045917	SYN	1	A	A	A	A	A	A	A	A	A	A	C	C	ECH74115_1033	1046618	1045650	969	702	AGC	S	AGC	S	NADH oxidoreductase hcr	transversion
CP001164	1048492	SYN	1	C	C	C	C	C	C	C	C	T	C	C	C	ECH74115_1035	1049325	1048426	900	834	CGC	R	CGT	R	putative membrane protein	transition
CP001164	1049223	NSYN	1	A	A	A	A	A	A	A	A	T	A	A	A	ECH74115_1035	1049325	1048426	900	103	CCA	P	TCA	S	putative membrane protein	transversion
CP001164	1049614	intergenic	1	A	T	T	T	T	T	T	T	T	T	T	T	intergenic	--	--	--	--	--	--			intergenic	transversion
CP001164	1049890	NSYN	1	G	G	G	G	G	G	G	G	G	G	A	G	ECH74115_1036	1050478	1049783	696	589	CTG	L	ATG	M	aquaporin Z	transition
CP001164	1050217	NSYN	1	G	G	G	G	G	G	G	G	G	G	A	G	ECH74115_1036	1050478	1049783	696	262	CTG	L	ATG	M	aquaporin Z	transition
CP001164	1052552	NSYN	1	A	G	G	G	G	G	G	G	G	A	G	G	ECH74115_1038	1050904	1052563	1659	1649	CAC	H	CGC	R	conserved hypothetical protein	transition
CP001164	1054072	NSYN	1	C	C	C	C	C	C	C	G	C	C	C	C	ECH74115_1039	1053666	1054782	1116	407	GCA	A	GGA	G	macrolide-specific efflux protein MacA	transversion
CP001164	1055205	NSYN	1	C	C	C	C	C	C	C	T	C	C	C	C	ECH74115_1040	1054778	1056725	1947	428	GCA	A	GTA	V	macrolide-specific ABC-type efflux carrier protein MacB	transition
CP001164	1059281	SYN	1	C	C	C	C	C	C	C	C	T	C	C	C	ECH74115_1043	1057695	1059972	2277	1587	ACC	T	ACT	T	ATP-dependent Clp protease ATP-binding subunit ClpA	transition
CP001164	1060041	intergenic	1	G	G	G	G	G	G	G	G	G	G	G	A	intergenic	--	--	--	--	--	--			intergenic	transition
CP001164	1060580	intergenic	1	G	G	G	G	G	G	G	G	G	G	G	A	intergenic	--	--	--	--	--	--			intergenic	transition
CP001164	1063148	SYN	1	T	G	G	G	G	G	T	T	T	T	T	T	ECH74115_1048	1063628	1061907	1722	481	GGT	G	GGT	G	ATP-binding/permease protein cydC	transversion
CP001164	1067972	NSYN	1	A	A	A	A	A	A	A	A	A	A	A	T	ECH74115_1052	1067657	1071686	4029	316	AAC	N	TAC	Y	DNA translocase FtsK	transversion
CP001164	1069642	SYN	1	C	C	C	C	C	C	C	C	C	C	C	G	ECH74115_1052	1067657	1071686	4029	1986	CGC	R	CGG	R	DNA translocase FtsK	transversion
CP001164	1071665	NSYN	1	T	T	T	T	T	T	T	T	T	T	T	G	ECH74115_1052	1067657	1071686	4029	4009	TCC	S	GCC	A	DNA translocase FtsK	transversion
CP001164	1073173	NSYN	1	A	A	A	A	A	A	A	A	A	A	C	A	ECH74115_1054	1072462	1073806	1344	712	ACC	T	CCC	P	putative DNA recombination-associated ATPase RarA	transversion
CP001164	1075717	SYN	1	C	C	C	C	C	C	C	T	C	C	C	C	ECH74115_1056	1075427	1077872	2445	291	GGC	G	GGT	G	anaerobic dimethyl sulfoxide reductase, A subunit	transition
CP001164	1078391	SYN	1	G	G	G	G	G	G	G	G	G	G	A	G	ECH74115_1057	1077882	1078500	618	510	CCG	P	CCA	P	anaerobic dimethyl sulfoxide reductase, B subunit	transition
CP001164	1089580	NSYN	1	C	C	C	C	C	C	C	C	C	C	C	T	ECH74115_1066	1089631	1087871	1761	52	AGC	S	TGC	C	conserved hypothetical protein	transition
CP001164	1095671	SYN	1	A	A	A	A	A	A	A	G	A	A	A	A	ECH74115_1072	1094994	1096668	1674	678	AAA	K	AAG	K	ribosomal protein S1	transition
CP001164	1099096	SYN	1	C	C	C	C	C	C	C	T	C	C	C	C	ECH74115_1074	1097318	1099583	2265	1779	GGC	G	GGT	G	DNA internalization-related competence protein ComEC/Rec2	transition
CP001164	1099837	SYN	1	G	G	G	G	G	G	G	G	A	G	G	G	ECH74115_1075	1099619	1101368	1749	219	GGG	G	GGA	G	lipid A export permease/ATP-binding protein MsbA	transition
CP001164	1104694	intergenic	1	C	C	C	C	C	C	C	C	A	C	C	C	intergenic	--	--	--	--	--	--			intergenic	transversion
CP001164	1104811	NSYN	1	G	G	G	G	G	G	G	A	G	G	G	G	ECH74115_1081	1104750	1105644	894	62	TGC	C	TAC	Y	conserved hypothetical protein	transition
CP001164	1105049	SYN	1	A	A	A	A	A	A	A	A	A	A	A	G	ECH74115_1081	1104750	1105644	894	300	GTA	V	GTG	V	conserved hypothetical protein	transition
CP001164	1110188	SYN	1	C	C	C	C	C	C	C	C	C	C	C	T	ECH74115_1085	1109324	1113785	4461	865	CTG	L	TTG	L	chromosome partition protein MukB	transition
CP001164	1110911	NSYN	1	C	C	C	C	C	C	C	C	C	C	C	T	ECH74115_1085	1109324	1113785	4461	1588	CGC	R	TGC	C	chromosome partition protein MukB	transition
CP001164	1111235	NSYN	1	C	C	C	C	C	C	T	C	C	C	C	C	ECH74115_1085	1109324	1113785	4461	1912	CGT	R	TGT	C	chromosome partition protein MukB	transition
CP001164	1111343	SYN	1	T	C	C	C	C	C	C	C	C	T	C	C	ECH74115_1085	1109324	1113785	4461	2020	TTG	L	CTG	L	chromosome partition protein MukB	transition
CP001164	1111612	SYN	1	C	C	C	C	C	C	T	C	C	C	C	C	ECH74115_1085	1109324	1113785	4461	2289	GCC	A	GCT	A	chromosome partition protein MukB	transition
CP001164	1120022	intergenic	1	T	T	T	T	T	T	T	T	T	T	T	A	intergenic	--	--	--	--	--	--			intergenic	transversion
CP001164	1122818	SYN	1	C	C	C	C	C	C	C	C	C	C	C	T	ECH74115_1092	1123183	1121981	1203	366	CTC	L	CTT	L	nicotinate phosphoribosyltransferase	transition
CP001164	1123729	NSYN	1	T	T	T	T	T	T	T	T	T	T	T	G	ECH74115_1094	1123449	1126062	2613	281	ATC	I	AGC	S	aminopeptidase N	transversion
CP001164	1126044	NSYN	1	A	A	A	A	A	A	A	A	A	A	A	C	ECH74115_1094	1123449	1126062	2613	2596	ACC	T	CCC	P	aminopeptidase N	transversion
CP001164	1127445	NSYN	1	C	A	A	A	A	A	C	C	C	C	C	C	ECH74115_1096	1127659	1126868	792	215	ACC	T	AAC	N	putative sulfonate ABC transporter, permease protein	transversion
CP001164	1134024	intergenic	1	T	T	T	T	T	T	T	T	T	T	T	C	intergenic	--	--	--	--	--	--			intergenic	transition
CP001164	1135612	intergenic	1	T	T	T	T	T	T	T	T	T	T	C	C	intergenic	--	--	--	--	--	--			intergenic	transition
CP001164	1136318	NSYN	1	T	T	T	T	T	T	T	T	T	T	G	T	ECH74115_1106	1136270	1136783	513	49	TGT	C	GGT	G	fimbrial protein	transversion
CP001164	1136952	intergenic	1	A	C	C	C	C	C	C	C	C	A	A	A	intergenic	--	--	--	--	--	--			intergenic	transversion
CP001164	1137961	NSYN	1	C	C	C	C	C	C	C	C	C	C	C	A	ECH74115_1109	1137595	1138606	1011	367	CTC	L	ATC	I	dihydroorotate oxidase	transversion
CP001164	1141465	SYN	1	T	T	T	T	T	T	T	T	T	T	T	A	ECH74115_1112	1140671	1142780	2109	795	GCT	A	GCA	A	putative RNA methylase family UPF0020	transversion
CP001164	1145739	SYN	1	C	C	T	C	C	C	C	C	C	C	C	C	ECH74115_1114	1144828	1146082	1254	912	GTC	V	GTT	V	paraquat-inducible protein A	transition
CP001164	1149250	NSYN	1	A	A	A	A	A	A	A	T	A	A	A	A	ECH74115_1118	1149297	1148779	519	48	AGA	R	AGT	S	beta-hydroxyacyl-(acyl-carrier-protein) dehydratase FabA	transversion
CP001164	1150938	SYN	1	G	G	G	G	G	G	G	G	G	G	A	G	ECH74115_1119	1151126	1149366	1761	189	GGC	G	GGA	G	peptidase, S16 (lon protease) family	transition
CP001164	1151102	SYN	1	G	G	G	G	G	G	G	G	G	G	G	A	ECH74115_1119	1151126	1149366	1761	25	ACG	T	ACG	T	peptidase, S16 (lon protease) family	transition
CP001164	1152546	NSYN	1	G	G	G	G	G	G	G	G	A	G	G	G	ECH74115_1121	1152903	1151839	1065	358	CAG	Q	AAG	K	outer membrane protein A	transition
CP001164	1154358	NSYN	1	T	T	T	T	T	T	T	T	T	T	T	C	ECH74115_1124	1153964	1154594	630	395	ATT	I	ACT	T	TfoX family protein	transition
CP001164	1154639	NSYN	1	G	A	A	A	A	A	A	A	A	G	A	A	ECH74115_1123	1156718	1154556	2163	2080	TAG	*	AAG	K	putative membrane protein	transition
CP001164	1154946	SYN	1	C	C	C	T	C	C	C	C	C	C	C	C	ECH74115_1123	1156718	1154556	2163	1773	CAC	H	CAT	H	putative membrane protein	transition
CP001164	1157615	SYN	1	C	C	C	C	C	C	C	C	T	C	C	C	ECH74115_1126	1157297	1159352	2055	319	CTG	L	TTG	L	helicase IV	transition
CP001164	1160975	SYN	1	G	G	G	G	G	G	G	G	G	G	A	G	ECH74115_1130	1160772	1161186	414	204	CCG	P	CCA	P	putative CoA-binding protein	transition
CP001164	1161800	SYN	1	G	G	G	G	G	G	G	G	G	G	T	G	ECH74115_1132	1162795	1161605	1191	996	GCC	A	GCT	A	conserved hypothetical protein	transversion
CP001164	1165908	intergenic	1	C	G	G	G	G	G	G	C	C	C	C	C	intergenic	--	--	--	--	--	--			intergenic	transversion
CP001164	1170711	intergenic	1	A	A	A	A	A	A	A	A	A	A	A	T	intergenic	--	--	--	--	--	--			intergenic	transversion
CP001164	1170717	intergenic	1	C	C	C	C	C	C	C	C	C	C	C	T	intergenic	--	--	--	--	--	--			intergenic	transition
CP001164	1171783	intergenic	1	C	C	C	C	C	C	C	C	C	C	T	C	intergenic	--	--	--	--	--	--			intergenic	transition
CP001164	1171896	intergenic	1	T	T	T	T	T	T	T	T	T	T	T	G	intergenic	--	--	--	--	--	--			intergenic	transversion
CP001164	1177003	SYN	1	C	T	T	T	T	T	T	T	T	C	C	C	ECH74115_1156	1177425	1176652	774	423	CCC	P	CCT	P	conserved hypothetical protein	transition
CP001164	1180451	intergenic	1	G	G	G	G	G	G	G	G	A	G	G	G	intergenic	--	--	--	--	--	--			intergenic	transition
CP001164	1216868	NSYN	1	G	G	G	G	G	G	A	G	G	G	G	G	ECH74115_1208	1216292	1217411	1119	577	GGC	G	AGC	S	nickel-dependent hydrogenase 1, small subunit	transition
CP001164	1221860	intergenic	1	G	G	G	G	G	G	G	G	A	G	G	G	intergenic	--	--	--	--	--	--			intergenic	transition
CP001164	1223382	NSYN	1	C	C	C	C	C	C	C	C	C	C	C	G	ECH74115_1214	1221893	1223438	1545	1490	GCC	A	GGC	G	cytochrome bd-II oxidase, subunit I	transversion
CP001164	1225445	NSYN	1	G	G	G	G	G	G	G	G	G	G	A	G	ECH74115_1216	1224770	1226075	1305	676	GCC	A	ACC	T	periplasmic AppA protein	transition
CP001164	1226533	SYN	1	G	G	G	G	G	G	G	G	G	G	A	G	ECH74115_1217	1228374	1226194	2181	1842	GCG	A	GCA	A	tyrosine-protein kinase etk	transition
CP001164	1231423	SYN	1	G	G	G	G	G	G	G	G	G	G	G	A	ECH74115_1220	1232109	1230013	2097	687	GTA	V	GTA	V	group 4 capsule (G4C) polysaccharide, lipoprotein YmcA	transition
CP001164	1231558	SYN	1	G	G	G	G	G	G	G	G	G	G	G	T	ECH74115_1220	1232109	1230013	2097	552	GCG	A	GCT	A	group 4 capsule (G4C) polysaccharide, lipoprotein YmcA	transversion
CP001164	1231882	SYN	1	A	G	G	G	G	G	G	G	G	A	G	G	ECH74115_1220	1232109	1230013	2097	228	AAA	K	AAG	K	group 4 capsule (G4C) polysaccharide, lipoprotein YmcA	transition
CP001164	1232010	SYN	1	G	G	G	G	G	G	T	G	G	G	G	G	ECH74115_1220	1232109	1230013	2097	100	TTG	L	TTG	L	group 4 capsule (G4C) polysaccharide, lipoprotein YmcA	transversion
CP001164	1232940	NSYN	1	G	G	G	G	G	G	G	G	G	G	A	G	ECH74115_1222	1233496	1232852	645	557	CGA	R	CAA	Q	group 4 capsule (G4C) polysaccharide, lipoprotein YmcC	transition
CP001164	1236867	NSYN	1	C	C	C	C	C	C	C	T	C	C	C	C	ECH74115_1229	1239534	1236820	2715	2668	GGC	G	TGC	C	sensor histidine kinase/response regulator TorS	transition
CP001164	1238073	NSYN	1	C	C	C	C	C	C	C	C	C	C	T	C	ECH74115_1229	1239534	1236820	2715	1462	ATC	I	TTC	F	sensor histidine kinase/response regulator TorS	transition
CP001164	1238449	SYN	1	G	G	G	G	G	G	G	G	G	G	G	A	ECH74115_1229	1239534	1236820	2715	1086	GTC	V	GTA	V	sensor histidine kinase/response regulator TorS	transition
CP001164	1240709	NSYN	1	C	C	C	C	C	C	C	T	C	C	C	C	ECH74115_1230	1241340	1240648	693	632	GCT	A	GTT	V	torCAD operon transcriptional regulatory protein TorR	transition
CP001164	1243618	NSYN	1	T	T	T	T	T	T	T	T	T	T	T	G	ECH74115_1233	1242642	1245189	2547	977	TTC	F	TGC	C	trimethylamine-N-oxide reductase	transversion
CP001164	1244150	SYN	1	A	A	A	A	A	A	A	A	A	A	A	G	ECH74115_1233	1242642	1245189	2547	1509	AAA	K	AAG	K	trimethylamine-N-oxide reductase	transition
CP001164	1244582	SYN	1	G	G	G	G	G	G	G	G	A	G	G	G	ECH74115_1233	1242642	1245189	2547	1941	CCG	P	CCA	P	trimethylamine-N-oxide reductase	transition
CP001164	1247392	intergenic	1	T	T	T	T	T	T	T	T	T	T	T	C	intergenic	--	--	--	--	--	--			intergenic	transition
CP001164	1248655	intergenic	1	G	G	G	G	G	G	G	G	G	G	G	A	intergenic	--	--	--	--	--	--			intergenic	transition
CP001164	1250893	NSYN	1	T	T	T	T	T	T	T	T	T	T	T	C	ECH74115_1242	1251094	1250498	597	202	ATT	I	CTT	L	NAD(P)H:quinone oxidoreductase, type IV	transition
CP001164	1251473	intergenic	1	A	A	A	A	A	A	A	T	A	A	A	A	intergenic	--	--	--	--	--	--			intergenic	transversion
CP001164	1253195	NSYN	1	T	T	T	T	T	T	T	T	T	T	G	G	ECH74115_1244	1253499	1253005	495	305	ATT	I	AGT	S	putative flavin reductase rutF	transversion
CP001164	1255484	NSYN	1	T	T	T	T	T	T	T	T	T	T	T	C	ECH74115_1248	1255964	1255269	696	481	GCT	A	CCT	P	putative isochorismatase family protein, rutB	transition
CP001164	1255677	NSYN	1	G	G	G	G	G	G	G	G	G	G	G	C	ECH74115_1248	1255964	1255269	696	288	GAG	E	GAC	D	putative isochorismatase family protein, rutB	transversion
CP001164	1255869	SYN	1	C	T	T	T	T	T	T	C	C	C	C	C	ECH74115_1248	1255964	1255269	696	96	CGT	R	CGT	R	putative isochorismatase family protein, rutB	transition
CP001164	1258614	NSYN	1	C	C	C	C	C	C	C	C	C	C	C	T	ECH74115_1251	1261980	1258018	3963	3367	CGC	R	TGC	C	bifunctional protein PutA	transition
CP001164	1259187	NSYN	1	G	G	G	G	G	G	G	G	G	G	G	A	ECH74115_1251	1261980	1258018	3963	2794	GTG	V	ATG	M	bifunctional protein PutA	transition
CP001164	1259489	NSYN	1	A	T	A	A	A	A	A	A	A	A	A	A	ECH74115_1251	1261980	1258018	3963	2492	CAG	Q	CTG	L	bifunctional protein PutA	transversion
CP001164	1263827	SYN	1	A	A	A	A	A	A	A	A	A	A	A	G	ECH74115_1253	1262403	1263912	1509	1425	GCA	A	GCG	A	sodium/proline symporter	transition
CP001164	1264837	intergenic	1	C	G	G	G	G	G	G	G	G	C	G	G	intergenic	--	--	--	--	--	--			intergenic	transversion
CP001164	1264894	intergenic	1	G	A	A	A	A	A	A	A	A	G	A	A	intergenic	--	--	--	--	--	--			intergenic	transition
CP001164	1269319	SYN	1	T	C	C	C	C	C	C	C	C	T	C	C	ECH74115_1260	1268606	1269878	1272	714	GCT	A	GCC	A	Tat-translocated enzyme	transition
CP001164	1269559	SYN	1	C	C	C	C	C	C	C	C	C	C	C	T	ECH74115_1260	1268606	1269878	1272	954	GAC	D	GAT	D	Tat-translocated enzyme	transition
CP001164	1269573	NSYN	1	G	G	G	G	G	G	G	G	G	G	G	T	ECH74115_1260	1268606	1269878	1272	968	GGG	G	GTG	V	Tat-translocated enzyme	transversion
CP001164	1270153	intergenic	1	A	A	A	A	A	A	A	A	A	A	A	T	intergenic	--	--	--	--	--	--			intergenic	transversion
CP001164	1271253	NSYN	1	C	C	C	C	C	C	C	C	C	C	C	A	ECH74115_1262	1270221	1271286	1065	1033	CTT	L	ATT	I	protein phoH	transversion
CP001164	1272900	NSYN	1	C	C	C	C	C	C	C	C	C	C	C	T	ECH74115_1264	1272988	1271750	1239	89	GCG	A	GTG	V	biofilm PGA synthesis N-glycosyltransferase PgaC	transition
CP001164	1273016	intergenic	1	G	G	G	G	G	G	G	G	A	G	G	G	intergenic	--	--	--	--	--	--			intergenic	transition
CP001164	1274981	NSYN	1	T	T	T	T	T	T	T	T	T	T	T	C	ECH74115_1265	1275086	1273068	2019	106	TTT	F	CTT	L	biofilm PGA synthesis lipoprotein pgaB	transition
CP001164	1275221	SYN	1	G	G	G	G	G	G	G	G	A	G	G	G	ECH74115_1266	1277518	1275095	2424	2298	GTA	V	GTA	V	biofilm PGA synthesis protein PgaA	transition
CP001164	1278875	SYN	1	A	A	A	A	A	A	A	A	A	A	A	T	ECH74115_1267	1278033	1279464	1431	843	GTA	V	GTT	V	diguanylate cyclase (GGDEF) domain protein	transversion
CP001164	1279712	NSYN	1	T	T	T	T	T	T	T	T	G	T	T	T	ECH74115_1268	1279657	1281172	1515	56	GTG	V	GGG	G	cyclic diguanylate phosphodiesterase (EAL) domain protein	transversion
CP001164	1279794	NSYN	1	T	T	T	T	T	T	T	T	A	T	T	T	ECH74115_1268	1279657	1281172	1515	138	GAT	D	GAA	E	cyclic diguanylate phosphodiesterase (EAL) domain protein	transversion
CP001164	1280412	SYN	1	A	T	T	T	T	T	T	T	T	A	T	T	ECH74115_1268	1279657	1281172	1515	756	TCA	S	TCT	S	cyclic diguanylate phosphodiesterase (EAL) domain protein	transversion
CP001164	1285629	NSYN	1	T	T	T	T	T	T	T	T	T	T	T	C	ECH74115_1273	1286067	1284883	1185	439	ACT	T	CCT	P	putative outer membrane protein	transition
CP001164	1286715	intergenic	1	C	C	C	C	C	C	C	C	C	C	C	T	intergenic	--	--	--	--	--	--			intergenic	transition
CP001164	1287250	intergenic	1	T	T	T	T	T	T	T	T	T	T	T	A	intergenic	--	--	--	--	--	--			intergenic	transversion
CP001164	1288676	intergenic	1	G	G	G	G	G	G	G	G	G	G	G	T	intergenic	--	--	--	--	--	--			intergenic	transversion
CP001164	1290469	NSYN	1	A	A	A	A	A	A	A	G	A	A	A	A	ECH74115_1278	1290570	1290193	378	102	AGT	S	AGG	R	conserved hypothetical protein	transition
CP001164	1291156	intergenic	1	G	G	G	G	G	G	G	G	G	G	G	T	intergenic	--	--	--	--	--	--			intergenic	transversion
CP001164	1291157	intergenic	1	A	A	A	A	A	A	A	A	A	A	A	G	intergenic	--	--	--	--	--	--			intergenic	transition
CP001164	1291548	intergenic	1	C	C	C	C	C	C	C	T	C	C	C	C	intergenic	--	--	--	--	--	--			intergenic	transition
CP001164	1291717	intergenic	1	G	G	G	G	G	G	G	G	G	G	A	G	intergenic	--	--	--	--	--	--			intergenic	transition
CP001164	1291721	intergenic	1	A	A	A	A	G	G	A	A	A	A	A	A	intergenic	--	--	--	--	--	--			intergenic	transition
CP001164	1294276	SYN	0.5	T	C	C	C	C	C	C	C	C	T	C	C	ECH74115_1281	1292207	1296020	3813	2070	TAT	Y	TAC	Y	haemagglutination activity domain protein	transition
CP001164	1296583	NSYN	0.5	G	G	G	G	G	G	G	A	G	G	G	G	ECH74115_1282	1296108	1297728	1620	476	TGG	W	TAG	*	hemolysin activator-related protein	transition
CP001164	1297879	NSYN	0.5	G	G	G	G	G	G	G	G	G	G	A	G	ECH74115_1283	1297743	1298112	369	137	CGG	R	CAG	Q	holo-(acyl-carrier-protein) synthase	transition
CP001164	1298807	NSYN	1	T	T	T	T	T	T	T	T	C	T	T	T	ECH74115_1284	1298131	1298887	756	677	ATC	I	ACC	T	oxidoreductase, short chain dehydrogenase/reductase family	transition
CP001164	1299045	SYN	1	G	G	G	G	G	G	G	G	G	G	T	G	ECH74115_1285	1298890	1299439	549	156	CTG	L	CTT	L	conserved hypothetical protein	transversion
CP001164	1299238	NSYN	1	C	T	T	T	T	T	T	C	C	C	C	C	ECH74115_1285	1298890	1299439	549	349	CGG	R	TGG	W	conserved hypothetical protein	transition
CP001164	1300329	NSYN	1	C	C	C	C	C	C	C	C	C	C	C	A	ECH74115_1287	1299777	1300938	1161	553	CTC	L	ATC	I	putative aminomethyltransferase	transversion
CP001164	1300604	SYN	1	A	A	A	A	A	A	A	A	A	A	A	C	ECH74115_1287	1299777	1300938	1161	828	CTA	L	CTC	L	putative aminomethyltransferase	transversion
CP001164	1301733	SYN	1	G	G	G	G	G	G	G	G	G	G	G	A	ECH74115_1288	1301011	1303570	2559	723	GGG	G	GGA	G	beta-ketoacyl synthase, C- domain protein	transition
CP001164	1301752	NSYN	1	A	A	A	A	A	A	A	A	C	A	A	A	ECH74115_1288	1301011	1303570	2559	742	ATC	I	CTC	L	beta-ketoacyl synthase, C- domain protein	transversion
CP001164	1304319	NSYN	1	A	A	A	A	A	A	A	A	A	A	A	T	ECH74115_1289	1303574	1304798	1224	746	CAA	Q	CTA	L	beta-ketoacyl synthase, C- domain protein	transversion
CP001164	1307547	NSYN	1	G	G	G	G	G	G	G	G	G	G	A	G	ECH74115_1293	1307106	1308417	1311	442	GCG	A	ACG	T	efflux ABC transporter, permease protein	transition
CP001164	1307557	NSYN	1	G	T	T	T	T	T	T	T	T	G	T	T	ECH74115_1293	1307106	1308417	1311	452	GGC	G	GTC	V	efflux ABC transporter, permease protein	transversion
CP001164	1310778	NSYN	1	C	C	C	C	C	C	C	C	C	C	A	C	ECH74115_1296	1310609	1311554	945	170	CCG	P	CAG	Q	malonyl CoA-acyl carrier protein transacylase	transversion
CP001164	1345649	SYN	1	T	T	C	T	T	T	T	T	T	T	T	T	ECH74115_1339	1345569	1347183	1614	81	GAT	D	GAC	D	IS66 family element, transposase	transition
CP001164	1390009	SYN	1	T	T	T	T	T	T	T	T	C	T	T	T	ECH74115_1395	1387736	1390586	2850	2274	CGT	R	CGC	R	pertactin family protein	transition
CP001164	1390015	SYN	1	C	C	C	C	C	C	C	C	T	C	C	C	ECH74115_1395	1387736	1390586	2850	2280	AGC	S	AGT	S	pertactin family protein	transition
CP001164	1390032	NSYN	1	A	A	A	A	A	A	A	A	G	A	A	A	ECH74115_1395	1387736	1390586	2850	2297	GAC	D	GGC	G	pertactin family protein	transition
CP001164	1390047	NSYN	1	G	G	G	G	G	G	G	G	A	G	G	G	ECH74115_1395	1387736	1390586	2850	2312	CGC	R	CAC	H	pertactin family protein	transition
CP001164	1390051	SYN	1	C	C	C	C	C	C	C	C	A	C	C	C	ECH74115_1395	1387736	1390586	2850	2316	GCC	A	GCA	A	pertactin family protein	transversion
CP001164	1390058	NSYN	1	T	T	T	T	T	T	T	T	C	T	T	T	ECH74115_1395	1387736	1390586	2850	2323	TGG	W	CGG	R	pertactin family protein	transition
CP001164	1390244	NSYN	1	C	C	C	C	C	C	C	C	T	C	C	C	ECH74115_1395	1387736	1390586	2850	2509	CAC	H	TAC	Y	pertactin family protein	transition
CP001164	1390393	SYN	1	G	G	G	G	G	G	G	G	T	G	G	G	ECH74115_1395	1387736	1390586	2850	2658	GGG	G	GGT	G	pertactin family protein	transversion
CP001164	1390432	SYN	1	C	C	C	C	C	C	C	C	A	C	C	C	ECH74115_1395	1387736	1390586	2850	2697	TCC	S	TCA	S	pertactin family protein	transversion
CP001164	1390434	NSYN	1	G	G	G	G	G	G	G	G	A	G	G	G	ECH74115_1395	1387736	1390586	2850	2699	CGG	R	CAG	Q	pertactin family protein	transition
CP001164	1390460	NSYN	1	G	G	G	G	G	G	G	G	G	G	A	G	ECH74115_1395	1387736	1390586	2850	2725	GCC	A	ACC	T	pertactin family protein	transition
CP001164	1390564	SYN	1	T	T	T	T	T	T	T	T	C	T	T	T	ECH74115_1395	1387736	1390586	2850	2829	GCT	A	GCC	A	pertactin family protein	transition
CP001164	1390617	intergenic	1	A	A	A	A	A	A	A	A	G	A	A	A	intergenic	--	--	--	--	--	--			intergenic	transition
CP001164	1390823	NSYN	1	T	T	T	T	T	T	T	T	A	T	T	T	ECH74115_1396	1390696	1393081	2385	128	CTG	L	CAG	Q	conserved hypothetical protein	transversion
CP001164	1390838	NSYN	1	G	G	G	G	G	G	G	G	A	G	G	G	ECH74115_1396	1390696	1393081	2385	143	CGG	R	CAG	Q	conserved hypothetical protein	transition
CP001164	1392012	SYN	1	T	T	T	T	T	T	T	T	C	T	T	T	ECH74115_1396	1390696	1393081	2385	1317	CGT	R	CGC	R	conserved hypothetical protein	transition
CP001164	1392027	SYN	1	G	G	G	G	G	G	G	G	A	G	G	G	ECH74115_1396	1390696	1393081	2385	1332	CAG	Q	CAA	Q	conserved hypothetical protein	transition
CP001164	1392033	SYN	1	C	C	C	C	C	C	C	C	T	C	C	C	ECH74115_1396	1390696	1393081	2385	1338	AGC	S	AGT	S	conserved hypothetical protein	transition
CP001164	1400519	intergenic	1	G	G	G	G	G	G	G	G	G	G	G	T	intergenic	--	--	--	--	--	--			intergenic	transversion
CP001164	1400800	SYN	0.5	C	C	C	C	C	C	C	C	C	C	C	T	ECH74115_1411	1400612	1401551	939	189	CTC	L	CTT	L	D-isomer specific 2-hydroxyacid dehydrogenase family protein	transition
CP001164	1402750	NSYN	1	A	A	A	A	A	A	A	A	T	A	A	A	ECH74115_1413	1402366	1402921	555	385	AGC	S	TGC	C	chaperone, TorD family	transversion
CP001164	1404185	NSYN	1	T	G	G	G	G	G	G	G	G	T	G	G	ECH74115_1416	1404410	1403577	834	226	CGT	R	GGT	G	curli production assembly/transport subunit CsgG	transversion
CP001164	1406280	intergenic	1	C	C	C	C	C	C	C	C	C	C	C	T	intergenic	--	--	--	--	--	--			intergenic	transition
CP001164	1406661	NSYN	1	G	G	G	G	G	G	A	G	G	G	G	G	ECH74115_1421	1406649	1407132	483	13	GTC	V	ATC	I	minor curlin protein CsgB	transition
CP001164	1413339	SYN	1	C	C	C	C	C	C	C	C	C	C	T	C	ECH74115_1428	1412044	1413598	1554	1296	GCC	A	GCT	A	glucans biosynthesis protein G	transition
CP001164	1414306	NSYN	1	C	C	C	C	C	C	A	C	C	C	C	C	ECH74115_1429	1413620	1416134	2514	687	AAC	N	AAA	K	glucans biosynthesis glucosyltransferase H	transversion
CP001164	1415326	SYN	1	C	C	C	C	C	C	C	C	C	C	T	C	ECH74115_1429	1413620	1416134	2514	1707	TTC	F	TTT	F	glucans biosynthesis glucosyltransferase H	transition
CP001164	1418108	intergenic	0.5	T	T	T	T	T	T	T	T	T	T	T	A	intergenic	--	--	--	--	--	--			intergenic	transversion
CP001164	1418837	NSYN	1	T	T	T	T	T	T	T	T	G	T	T	T	ECH74115_1433	1419309	1418389	921	473	ATT	I	AGT	S	lipid A biosynthesis lauroyl acyltransferase	transversion
CP001164	1419752	SYN	1	G	G	G	G	G	G	G	G	G	G	G	A	ECH74115_1434	1419534	1420587	1053	219	GCG	A	GCA	A	rhodanese domain protein	transition
CP001164	1421090	SYN	1	A	A	A	A	A	A	A	A	A	A	A	G	ECH74115_1435	1421203	1420628	576	114	AAA	K	AAG	K	YceI protein	transition
CP001164	1424256	intergenic	1	T	T	T	T	T	T	T	T	T	T	C	T	intergenic	--	--	--	--	--	--			intergenic	transition
CP001164	1424257	intergenic	1	A	A	A	A	A	A	A	A	A	A	A	G	intergenic	--	--	--	--	--	--			intergenic	transition
CP001164	1424517	NSYN	1	G	G	G	G	G	G	G	G	A	G	G	G	ECH74115_1441	1425337	1424291	1047	821	GGT	G	GAT	D	dihydroorotase, homodimeric type	transition
CP001164	1425320	SYN	1	C	C	C	C	C	C	C	C	C	C	C	T	ECH74115_1441	1425337	1424291	1047	18	CTG	L	CTT	L	dihydroorotase, homodimeric type	transition
CP001164	1426520	SYN	1	A	A	A	A	A	A	A	A	C	A	A	A	ECH74115_1443	1426784	1426137	648	265	CCA	P	CCA	P	glutaredoxin, GrxB family	transversion
CP001164	1428436	NSYN	1	C	C	C	C	C	C	C	T	C	C	C	C	ECH74115_1445	1428292	1428877	585	145	CGC	R	TGC	C	ribosomal-protein-alanine acetyltransferase	transition
CP001164	1428999	NSYN	1	G	G	G	G	G	G	G	G	G	G	G	A	ECH74115_1446	1428887	1429535	648	113	TGT	C	TAT	Y	conserved hypothetical protein	transition
CP001164	1429218	NSYN	1	C	C	C	C	C	C	C	T	C	C	C	C	ECH74115_1446	1428887	1429535	648	332	GCC	A	GTC	V	conserved hypothetical protein	transition
CP001164	1434594	NSYN	1	C	C	C	C	C	C	C	C	C	C	T	C	ECH74115_1454	1434584	1435280	696	11	GCG	A	GTG	V	flagellar hook capping protein FlgD	transition
CP001164	1434601	SYN	1	C	C	C	C	C	C	C	C	C	C	C	T	ECH74115_1454	1434584	1435280	696	18	ACC	T	ACT	T	flagellar hook capping protein FlgD	transition
CP001164	1437697	SYN	1	C	C	C	C	C	C	C	C	C	C	T	C	ECH74115_1457	1437422	1438205	783	276	AGC	S	AGT	S	flagellar basal-body rod protein FlgG	transition
CP001164	1438712	SYN	1	T	T	T	T	T	T	T	T	T	T	T	C	ECH74115_1458	1438257	1438956	699	456	GTT	V	GTC	V	flagellar L-ring protein FlgH	transition
CP001164	1445488	SYN	1	C	T	T	C	C	C	C	C	C	C	C	C	ECH74115_1463	1447059	1443874	3186	1572	CGG	R	CGT	R	ribonuclease E	transition
CP001164	1446810	NSYN	1	C	C	C	C	C	C	C	C	T	C	C	C	ECH74115_1463	1447059	1443874	3186	250	AGC	S	TGC	C	ribonuclease E	transition
CP001164	1448852	NSYN	1	T	C	T	T	T	T	T	T	T	T	T	T	ECH74115_1465	1449315	1448692	624	464	CTC	L	CCC	P	septum formation protein Maf	transition
CP001164	1449968	intergenic	1	T	C	C	C	C	C	C	C	C	T	C	C	intergenic	--	--	--	--	--	--			intergenic	transition
CP001164	1450348	SYN	1	C	C	C	C	C	C	C	C	T	C	C	C	ECH74115_1469	1450301	1451372	1071	48	GGC	G	GGT	G	fatty acid/phospholipid synthesis protein PlsX	transition
CP001164	1450431	NSYN	1	C	C	T	C	C	C	C	C	C	C	C	C	ECH74115_1469	1450301	1451372	1071	131	GCC	A	GTC	V	fatty acid/phospholipid synthesis protein PlsX	transition
CP001164	1451828	SYN	1	G	G	G	G	G	G	G	G	A	G	G	G	ECH74115_1470	1451439	1452393	954	390	GCG	A	GCA	A	3-oxoacyl-[acyl-carrier-protein] synthase 3	transition
CP001164	1454393	SYN	1	A	A	A	A	A	A	A	A	A	A	A	G	ECH74115_1473	1454295	1454532	237	99	CTA	L	CTG	L	acyl carrier protein	transition
CP001164	1457993	NSYN	1	A	A	A	A	A	A	A	A	A	A	A	G	ECH74115_1477	1457804	1458446	642	190	ATC	I	GTC	V	thymidylate kinase	transition
CP001164	1459194	NSYN	1	G	G	G	G	G	G	G	G	G	G	G	T	ECH74115_1478	1458442	1459447	1005	753	TTG	L	TTT	F	DNA polymerase III, delta' subunit	transversion
CP001164	1459229	NSYN	1	C	C	C	C	C	C	C	C	C	C	C	T	ECH74115_1478	1458442	1459447	1005	788	GCG	A	GTG	V	DNA polymerase III, delta' subunit	transition
CP001164	1460398	intergenic	1	C	C	C	C	C	C	C	C	C	C	T	C	intergenic	--	--	--	--	--	--			intergenic	transition
CP001164	1462440	NSYN	1	C	C	C	C	C	C	C	C	C	C	C	T	ECH74115_1481	1464231	1462042	2190	1792	GCC	A	TCC	S	TonB-dependent siderophore receptor FhuE	transition
CP001164	1463416	SYN	1	G	G	G	G	G	G	G	G	G	G	G	A	ECH74115_1481	1464231	1462042	2190	816	GCT	A	GCA	A	TonB-dependent siderophore receptor FhuE	transition
CP001164	1464316	NSYN	1	C	C	C	C	C	C	C	C	C	C	C	T	ECH74115_1482	1464452	1464264	189	137	GCT	A	GTT	V	conserved hypothetical protein	transition
CP001164	1466145	NSYN	1	A	G	G	G	G	G	G	G	G	A	G	G	ECH74115_1486	1465958	1466783	825	188	CAC	H	CGC	R	thiamine kinase	transition
CP001164	1467029	SYN	1	G	G	G	G	G	G	G	G	G	G	G	A	ECH74115_1487	1466793	1467819	1026	237	CCG	P	CCA	P	beta-N-acetylhexosaminidase	transition
CP001164	1467821	intergenic	1	C	C	C	C	C	C	C	C	C	C	C	T	intergenic	--	--	--	--	--	--			intergenic	transition
CP001164	1471049	NSYN	1	C	C	C	C	T	T	C	C	C	C	C	C	ECH74115_1491	1471547	1470915	633	499	CAC	H	TAC	Y	transcriptional regulator, TetR family	transition
CP001164	1474362	NSYN	1	T	T	T	T	T	T	T	T	T	T	T	C	ECH74115_1494	1476680	1473234	3447	2319	TAG	*	TAC	Y	transcription-repair coupling factor	transition
CP001164	1477178	NSYN	1	C	C	C	C	C	C	C	C	C	C	C	T	ECH74115_1495	1477881	1476808	1074	704	CCA	P	CTA	L	putative acyltransferase	transition
CP001164	1480752	SYN	1	C	T	T	C	C	C	C	C	C	C	C	C	ECH74115_1498	1480036	1481281	1245	717	CGC	R	CGT	R	lipoprotein releasing system, transmembrane protein LolE	transition
CP001164	1481466	NSYN	1	G	G	G	G	G	G	G	G	G	G	G	A	ECH74115_1499	1481309	1482221	912	158	CGT	R	CAT	H	N-acetylglucosamine kinase	transition
CP001164	1481928	NSYN	1	C	C	C	C	C	C	C	C	C	C	C	A	ECH74115_1499	1481309	1482221	912	620	CCG	P	CAG	Q	N-acetylglucosamine kinase	transversion
CP001164	1483003	SYN	1	C	C	C	C	C	C	C	C	C	C	C	A	ECH74115_1500	1482236	1483058	822	768	GGC	G	GGA	G	NAD-dependent deacetylase	transversion
CP001164	1483618	SYN	1	C	C	C	C	C	C	C	T	C	C	C	C	ECH74115_1501	1484259	1483213	1047	642	CGG	R	CGT	R	spermidine/putrescine ABC transporter, periplasmic spermidine/putrescine-binding protein	transition
CP001164	1484243	NSYN	1	C	C	T	C	C	C	C	C	C	C	C	C	ECH74115_1501	1484259	1483213	1047	17	GCG	A	GTG	V	spermidine/putrescine ABC transporter, periplasmic spermidine/putrescine-binding protein	transition
CP001164	1484490	SYN	1	T	T	T	T	T	T	T	T	T	T	T	C	ECH74115_1502	1485050	1484256	795	561	TGC	C	TGC	C	spermidine/putrescine ABC transporter, permease protein PotC	transition
CP001164	1488041	intergenic	1	C	C	C	C	C	C	C	C	C	C	T	C	intergenic	--	--	--	--	--	--			intergenic	transition
CP001164	1589581	NSYN	1	A	G	G	G	G	G	A	A	A	A	A	A	ECH74115_1644	1589101	1589683	582	481	ACC	T	GCC	A	tail fiber assembly protein	transition
CP001164	1604543	intergenic	1	C	C	C	C	C	C	C	C	C	C	A	C	intergenic	--	--	--	--	--	--			intergenic	transversion
CP001164	1605076	NSYN	1	G	G	G	G	G	G	G	A	G	G	G	G	ECH74115_1662	1604758	1605127	369	319	GGA	G	AGA	R	putative fels-1 Prophage Protein	transition
CP001164	1605640	intergenic	1	T	T	T	T	T	T	T	T	T	T	T	C	intergenic	--	--	--	--	--	--			intergenic	transition
CP001164	1606528	NSYN	1	T	T	T	T	T	T	T	T	T	T	T	C	ECH74115_1666	1606236	1606896	660	293	GTG	V	GCG	A	fumarylacetoacetate hydrolase family protein	transition
CP001164	1607675	NSYN	1	C	C	C	C	C	C	C	T	C	C	C	C	ECH74115_1668	1608695	1607640	1056	1021	ACC	T	TCC	S	hemolysin E, chromosomal	transition
CP001164	1609630	SYN	1	G	G	G	G	G	G	G	G	G	G	G	A	ECH74115_1671	1609343	1610612	1269	288	GAG	E	GAA	E	protein UmuC	transition
CP001164	1612467	SYN	1	T	T	T	T	T	T	T	T	T	T	T	C	ECH74115_1673	1612874	1611333	1542	408	TAC	Y	TAC	Y	Na+/H+ antiporter NhaB	transition
CP001164	1623834	intergenic	1	G	G	G	G	G	G	G	G	G	G	G	A	intergenic	--	--	--	--	--	--			intergenic	transition
CP001164	1626687	SYN	1	C	C	C	C	C	C	C	C	C	C	T	C	ECH74115_1687	1628181	1626502	1680	1495	TAC	Y	TAC	Y	sulfate permease	transition
CP001164	1627227	NSYN	1	G	G	G	G	G	G	G	G	G	G	G	T	ECH74115_1687	1628181	1626502	1680	955	CAG	Q	TAG	*	sulfate permease	transversion
CP001164	1628843	SYN	1	A	A	A	A	A	A	A	A	A	A	A	C	ECH74115_1688	1629253	1628306	948	411	ACC	T	ACC	T	ribose-phosphate pyrophosphokinase	transversion
CP001164	1633981	NSYN	1	C	C	C	C	C	C	C	C	C	C	C	A	ECH74115_1693	1633472	1634306	834	510	AGC	S	AGA	R	protein-(glutamine-N5) methyltransferase, release factor-specific	transversion
CP001164	1636336	NSYN	1	G	G	G	G	G	G	G	G	G	G	G	A	ECH74115_1696	1635543	1636398	855	794	AGG	R	AAG	K	3-deoxy-8-phosphooctulonate synthase	transition
CP001164	1636491	intergenic	1	C	C	C	C	C	C	C	T	C	C	C	C	intergenic	--	--	--	--	--	--			intergenic	transition
CP001164	1637935	SYN	1	G	G	A	G	G	G	G	G	G	G	G	G	ECH74115_1699	1638687	1637587	1101	753	GCT	A	GCA	A	calcium/proton antiporter	transition
CP001164	1638610	NSYN	1	C	C	C	C	C	C	C	A	C	C	C	C	ECH74115_1699	1638687	1637587	1101	78	CAC	H	CAA	Q	calcium/proton antiporter	transversion
CP001164	1640334	NSYN	1	G	T	T	T	T	T	T	T	T	G	T	T	ECH74115_1702	1640440	1640087	354	107	AGC	S	ATC	I	dsrE family protein	transversion
CP001164	1644603	NSYN	1	A	A	A	A	A	A	A	A	A	A	A	C	ECH74115_1706	1644486	1644705	219	118	AGC	S	CGC	R	hypothetical protein	transversion
CP001164	1645036	SYN	1	T	T	T	T	T	T	T	T	T	T	T	C	ECH74115_1707	1644799	1646191	1392	238	TTG	L	CTG	L	nitrite extrusion protein 1	transition
CP001164	1645457	NSYN	1	T	G	G	G	G	G	G	T	T	T	T	T	ECH74115_1707	1644799	1646191	1392	659	GTG	V	GGG	G	nitrite extrusion protein 1	transversion
CP001164	1645513	NSYN	1	A	A	A	A	G	G	A	A	A	A	A	A	ECH74115_1707	1644799	1646191	1392	715	ACC	T	GCC	A	nitrite extrusion protein 1	transition
CP001164	1646302	intergenic	1	A	A	A	A	A	A	A	A	A	A	A	G	intergenic	--	--	--	--	--	--			intergenic	transition
CP001164	1646389	intergenic	1	G	G	G	G	G	G	G	G	G	G	A	G	intergenic	--	--	--	--	--	--			intergenic	transition
CP001164	1647368	SYN	1	T	C	C	C	C	C	C	C	C	T	C	C	ECH74115_1708	1646583	1650327	3744	786	ACT	T	ACC	T	nitrate reductase 1, alpha subunit	transition
CP001164	1650664	SYN	1	G	G	G	G	G	G	G	G	G	G	T	G	ECH74115_1709	1650323	1651862	1539	342	GCG	A	GCT	A	nitrate reductase 1, beta subunit	transversion
CP001164	1652190	SYN	1	G	G	G	G	G	G	G	G	G	G	G	A	ECH74115_1710	1651858	1652569	711	333	CCG	P	CCA	P	nitrate reductase molybdenum cofactor assembly chaperone 1	transition
CP001164	1653915	intergenic	1	A	A	A	A	A	A	A	A	A	A	A	G	intergenic	--	--	--	--	--	--			intergenic	transition
CP001164	1663773	intergenic	1	G	G	G	G	G	G	G	G	G	G	G	T	intergenic	--	--	--	--	--	--			intergenic	transversion
CP001164	1663945	intergenic	1	A	A	A	A	A	A	A	A	A	A	A	C	intergenic	--	--	--	--	--	--			intergenic	transversion
CP001164	1665014	intergenic	1	G	G	G	G	G	G	T	G	G	G	G	G	intergenic	--	--	--	--	--	--			intergenic	transversion
CP001164	1668400	NSYN	1	C	C	T	C	C	C	C	C	C	C	C	C	ECH74115_1731	1668177	1669083	906	224	CCG	P	CTG	L	oligopeptide ABC transporter, permease protein OppC	transition
CP001164	1668450	SYN	1	C	T	T	T	T	T	C	C	C	C	C	C	ECH74115_1731	1668177	1669083	906	274	CTG	L	TTG	L	oligopeptide ABC transporter, permease protein OppC	transition
CP001164	1678133	intergenic	1	C	C	C	C	C	C	C	C	C	C	A	C	intergenic	--	--	--	--	--	--			intergenic	transversion
CP001164	1690738	intergenic	1	A	A	A	A	A	A	G	A	A	A	A	A	intergenic	--	--	--	--	--	--			intergenic	transition
CP001164	1702204	SYN	1	C	C	T	C	C	C	C	C	C	C	C	T	ECH74115_1783	1701848	1703774	1926	357	GTC	V	GTT	V	phage terminase large subunit	transition
CP001164	1702213	SYN	1	C	C	T	C	C	C	C	C	C	C	C	C	ECH74115_1783	1701848	1703774	1926	366	ACC	T	ACT	T	phage terminase large subunit	transition
CP001164	1702216	SYN	1	C	C	T	C	C	C	C	C	C	C	C	C	ECH74115_1783	1701848	1703774	1926	369	ATC	I	ATT	I	phage terminase large subunit	transition
CP001164	1735355	intergenic	1	G	G	G	G	G	G	G	A	G	G	G	G	intergenic	--	--	--	--	--	--			intergenic	transition
CP001164	1735476	intergenic	1	A	T	T	T	T	T	A	A	A	A	A	A	intergenic	--	--	--	--	--	--			intergenic	transversion
CP001164	1736251	intergenic	1	G	G	G	G	G	G	G	A	G	G	G	G	intergenic	--	--	--	--	--	--			intergenic	transition
CP001164	1784391	intergenic	1	C	T	T	T	T	T	T	T	T	C	T	T	intergenic	--	--	--	--	--	--			intergenic	transition
CP001164	1787219	NSYN	1	G	G	G	G	G	G	G	G	G	G	T	G	ECH74115_1894	1787819	1786461	1359	601	AAG	K	TAG	*	tryptophan biosynthesis protein trpCF	transversion
CP001164	1789054	NSYN	1	C	C	C	C	C	C	C	C	C	C	G	C	ECH74115_1895	1789418	1787823	1596	365	TCC	S	TGC	C	anthranilate synthase, component II	transversion
CP001164	1790656	NSYN	1	C	C	C	C	C	C	C	C	C	C	T	T	ECH74115_1896	1790980	1789418	1563	325	ACC	T	TCC	S	anthranilate synthase, component I	transition
CP001164	1791251	intergenic	1	G	A	A	A	A	A	G	G	G	G	G	G	intergenic	--	--	--	--	--	--			intergenic	transition
CP001164	1793016	SYN	1	G	G	G	G	G	G	G	G	A	G	G	G	ECH74115_1900	1792780	1794364	1584	237	CAG	Q	CAA	Q	conserved hypothetical protein	transition
CP001164	1795316	SYN	1	G	G	G	G	G	G	G	G	G	G	T	G	ECH74115_1901	1794576	1795449	873	741	CCG	P	CCT	P	ribosomal large subunit pseudouridine synthase B	transversion
CP001164	1795505	NSYN	1	T	T	T	T	T	T	T	T	T	T	T	C	ECH74115_1902	1796078	1795488	591	574	TAT	Y	CAT	H	cob(I)yrinic acid a,c-diamide adenosyltransferase	transition
CP001164	1796018	SYN	1	T	T	T	T	T	T	T	T	T	T	T	C	ECH74115_1902	1796078	1795488	591	61	CAT	H	CAT	H	cob(I)yrinic acid a,c-diamide adenosyltransferase	transition
CP001164	1801937	NSYN	1	G	G	G	G	G	G	G	G	G	G	T	G	ECH74115_1907	1801576	1802551	975	362	CGC	R	CTC	L	HTH-type transcriptional regulator CysB	transversion
CP001164	1802157	SYN	1	G	G	G	G	G	G	G	G	G	G	G	A	ECH74115_1907	1801576	1802551	975	582	TTG	L	TTA	L	HTH-type transcriptional regulator CysB	transition
CP001164	1804146	NSYN	1	T	G	G	G	G	G	G	G	G	T	G	G	ECH74115_1910	1803552	1806228	2676	595	TGT	C	GGT	G	aconitate hydratase 1	transversion
CP001164	1809622	SYN	1	T	T	T	T	T	T	T	T	T	T	T	C	ECH74115_1915	1809622	1809482	141	1	CAT	H	CAT	H	hypothetical protein	transition
CP001164	1812262	NSYN	1	T	T	T	T	T	T	T	T	T	T	T	C	ECH74115_1920	1812329	1812156	174	68	GTC	V	GCC	A	conserved hypothetical protein	transition
CP001164	1813552	intergenic	1	G	A	A	A	A	A	A	G	G	G	G	G	intergenic	--	--	--	--	--	--			intergenic	transition
CP001164	1814373	intergenic	1	C	C	C	C	C	C	C	C	C	C	T	C	intergenic	--	--	--	--	--	--			intergenic	transition
CP001164	1817339	SYN	1	C	C	C	C	C	C	C	C	T	C	C	C	ECH74115_1924	1817821	1816694	1128	483	CAC	H	CAT	H	conserved hypothetical protein	transition
CP001164	1822260	intergenic	1	T	T	T	T	T	T	T	T	T	T	T	A	intergenic	--	--	--	--	--	--			intergenic	transversion
CP001164	1824006	intergenic	1	T	T	T	T	T	T	T	G	T	T	T	T	intergenic	--	--	--	--	--	--			intergenic	transversion
CP001164	1825001	NSYN	1	C	C	C	C	C	C	C	C	C	C	C	T	ECH74115_1929	1824179	1825553	1374	823	CGC	R	TGC	C	multidrug efflux outer membrane protein EefC	transition
CP001164	1825331	NSYN	1	C	C	C	C	C	C	C	C	T	C	C	C	ECH74115_1929	1824179	1825553	1374	1153	CAA	Q	TAA	*	multidrug efflux outer membrane protein EefC	transition
CP001164	1826748	intergenic	1	T	T	T	T	T	T	T	T	T	T	T	G	intergenic	--	--	--	--	--	--			intergenic	transversion
CP001164	1830913	SYN	1	C	C	C	C	C	C	C	C	C	C	C	T	ECH74115_1935	1832034	1830415	1620	1122	CAC	H	CAT	H	peptide ABC transporter, periplasmic peptide-binding protein	transition
CP001164	1830950	NSYN	1	A	A	A	A	A	A	A	A	A	A	A	G	ECH74115_1935	1832034	1830415	1620	1085	CAA	Q	CGA	R	peptide ABC transporter, periplasmic peptide-binding protein	transition
CP001164	1832086	intergenic	1	C	C	C	C	C	C	C	C	C	C	G	C	intergenic	--	--	--	--	--	--			intergenic	transversion
CP001164	1832113	intergenic	1	T	T	T	T	T	T	T	T	T	T	T	G	intergenic	--	--	--	--	--	--			intergenic	transversion
CP001164	1834054	NSYN	1	C	C	C	C	C	C	C	C	C	C	C	A	ECH74115_1938	1834135	1832750	1386	82	CAC	H	AAC	N	amino acid permease	transversion
CP001164	1834338	intergenic	1	T	T	T	T	T	T	T	T	T	T	T	C	intergenic	--	--	--	--	--	--			intergenic	transition
CP001164	1836033	intergenic	1	A	A	A	A	A	A	A	G	A	A	A	A	intergenic	--	--	--	--	--	--			intergenic	transition
CP001164	1836067	intergenic	1	A	A	A	A	A	A	A	A	A	A	A	C	intergenic	--	--	--	--	--	--			intergenic	transversion
CP001164	1836339	NSYN	1	A	A	A	A	A	A	A	A	A	A	A	G	ECH74115_1940	1836080	1836833	753	260	GAG	E	GGG	G	gamma-glutamyl-gamma-aminobutyrate hydrolase	transition
CP001164	1837089	SYN	1	G	G	G	G	G	G	G	A	G	G	G	G	ECH74115_1941	1836859	1837417	558	231	CAG	Q	CAA	Q	transcriptional regulator PuuR	transition
CP001164	1839883	NSYN	1	T	G	G	G	G	G	G	G	G	T	T	T	ECH74115_1943	1839055	1840336	1281	829	TGC	C	GGC	G	gamma-glutamylputrescine oxidoreductase	transversion
CP001164	1841281	SYN	1	G	G	G	G	G	G	G	G	G	G	G	A	ECH74115_1944	1840373	1841639	1266	909	GCG	A	GCA	A	4-aminobutyrate transaminase	transition
CP001164	1841353	SYN	1	G	A	A	A	A	A	A	G	G	G	G	G	ECH74115_1944	1840373	1841639	1266	981	GGG	G	GGA	G	4-aminobutyrate transaminase	transition
CP001164	1843643	SYN	1	G	G	G	G	G	G	T	G	G	G	G	G	ECH74115_1947	1843635	1843860	225	9	GCG	A	GCT	A	phage shock protein B	transversion
CP001164	1845921	intergenic	1	G	G	G	G	G	G	G	G	G	G	G	T	intergenic	--	--	--	--	--	--			intergenic	transversion
CP001164	1846065	intergenic	1	C	C	C	C	C	C	C	C	C	C	T	C	intergenic	--	--	--	--	--	--			intergenic	transition
CP001164	1846817	intergenic	0.5	C	C	C	C	C	C	C	C	C	C	C	A	intergenic	--	--	--	--	--	--			intergenic	transversion
CP001164	1849894	SYN	1	T	T	T	T	T	T	T	T	T	T	T	C	ECH74115_1958	1849793	1850846	1053	102	GGT	G	GGC	G	oxidoreductase, zinc-binding dehydrogenase family	transition
CP001164	1850011	SYN	1	C	C	C	C	C	C	C	C	C	C	C	T	ECH74115_1958	1849793	1850846	1053	219	GGC	G	GGT	G	oxidoreductase, zinc-binding dehydrogenase family	transition
CP001164	1854944	SYN	1	C	C	C	C	C	C	T	C	C	C	C	C	ECH74115_1961	1852713	1854981	2268	2232	TTC	F	TTT	F	glycosyl hydrolase, family 65	transition
CP001164	1856189	SYN	1	G	G	G	G	G	G	G	G	G	G	G	A	ECH74115_1963	1855650	1856733	1083	540	CTG	L	CTA	L	sugar ABC transporter, ATP-binding protein	transition
CP001164	1861335	SYN	1	T	C	C	C	C	C	C	C	C	T	C	C	ECH74115_1967	1860340	1861402	1062	996	TTT	F	TTC	F	conserved hypothetical protein TIGR01620	transition
CP001164	1869949	NSYN	1	G	A	A	A	A	A	A	A	A	G	A	A	ECH74115_1977	1869600	1871214	1614	350	TGC	C	TAC	Y	periplasmic murein peptide-binding protein	transition
CP001164	1873989	SYN	1	T	C	C	C	C	C	C	C	C	T	C	C	ECH74115_1981	1874700	1873948	753	712	CGT	R	CGT	R	fumarate and nitrate reduction regulatory protein	transition
CP001164	1874039	NSYN	1	C	C	C	C	C	C	C	C	C	C	T	C	ECH74115_1981	1874700	1873948	753	662	GCT	A	GTT	V	fumarate and nitrate reduction regulatory protein	transition
CP001164	1877000	NSYN	1	G	G	G	G	G	G	G	G	G	G	G	A	ECH74115_1984	1878429	1876984	1446	1430	CGG	R	CAG	Q	aminobenzoyl-glutamate utilization protein B	transition
CP001164	1877997	NSYN	1	C	C	C	C	T	T	C	C	C	C	C	C	ECH74115_1984	1878429	1876984	1446	433	GCC	A	TCC	S	aminobenzoyl-glutamate utilization protein B	transition
CP001164	1880253	SYN	1	A	A	A	A	A	A	A	A	A	A	A	C	ECH74115_1986	1879915	1880824	909	339	GTA	V	GTC	V	putative HTH-type transcriptional regulator abgR	transversion
CP001164	1882150	NSYN	1	C	C	C	C	C	C	C	C	C	C	C	T	ECH74115_1989	1883029	1881737	1293	880	GCC	A	TCC	S	sensory box-containing diguanylate cyclase	transition
CP001164	1884749	NSYN	1	G	G	G	G	G	G	G	G	G	G	G	A	ECH74115_1992	1884685	1886059	1374	65	GGT	G	GAT	D	ATP-independent RNA helicase DbpA	transition
CP001164	1885346	NSYN	1	A	A	A	A	A	A	A	A	A	A	A	G	ECH74115_1992	1884685	1886059	1374	662	TAT	Y	TGT	C	ATP-independent RNA helicase DbpA	transition
CP001164	1885557	SYN	1	C	C	C	C	C	C	C	T	C	C	C	C	ECH74115_1992	1884685	1886059	1374	873	AGC	S	AGT	S	ATP-independent RNA helicase DbpA	transition
CP001164	1886179	intergenic	1	T	T	T	T	T	T	T	C	T	T	T	T	intergenic	--	--	--	--	--	--			intergenic	transition
CP001164	1888953	intergenic	1	C	C	C	C	C	C	C	C	C	C	C	T	intergenic	--	--	--	--	--	--			intergenic	transition
CP001164	1889609	NSYN	1	C	C	C	C	C	C	C	C	C	C	C	T	ECH74115_1998	1892876	1889352	3525	3268	AGC	S	TGC	C	pyruvate-flavodoxin oxidoreductase	transition
CP001164	1890465	SYN	1	G	G	G	G	G	G	G	G	G	G	G	A	ECH74115_1998	1892876	1889352	3525	2412	GCG	A	GCA	A	pyruvate-flavodoxin oxidoreductase	transition
CP001164	1891325	SYN	1	C	T	T	T	T	T	T	C	C	C	C	C	ECH74115_1998	1892876	1889352	3525	1552	TGC	C	TGC	C	pyruvate-flavodoxin oxidoreductase	transition
CP001164	1891750	NSYN	1	A	A	A	A	A	A	C	A	A	A	A	A	ECH74115_1998	1892876	1889352	3525	1127	TAC	Y	TCC	S	pyruvate-flavodoxin oxidoreductase	transversion
CP001164	1899251	intergenic	1	T	T	T	T	T	T	T	T	T	T	C	C	intergenic	--	--	--	--	--	--			intergenic	transition
CP001164	1902469	intergenic	1	A	T	A	A	A	A	A	A	A	A	A	A	intergenic	--	--	--	--	--	--			intergenic	transversion
CP001164	1902489	intergenic	1	G	G	G	G	G	G	G	G	G	G	G	C	intergenic	--	--	--	--	--	--			intergenic	transversion
CP001164	1903379	intergenic	1	C	C	C	C	C	C	C	C	C	C	A	C	intergenic	--	--	--	--	--	--			intergenic	transversion
CP001164	1904903	SYN	1	G	G	G	G	G	G	G	G	G	G	G	T	ECH74115_2008	1904643	1905504	861	261	GCG	A	GCT	A	oxidoreductase, aldo/keto reductase family	transversion
CP001164	1905582	SYN	1	C	C	C	C	C	C	C	C	C	C	C	A	ECH74115_2009	1905484	1905598	114	99	GGC	G	GGA	G	hypothetical protein	transversion
CP001164	1905675	NSYN	1	A	C	C	C	C	C	C	C	C	A	C	C	ECH74115_2010	1905567	1907874	2307	109	ACT	T	CCT	P	hypothetical protein	transversion
CP001164	1906491	NSYN	1	C	C	C	C	C	C	C	C	C	C	T	C	ECH74115_2010	1905567	1907874	2307	925	CCT	P	TCT	S	hypothetical protein	transition
CP001164	1909908	SYN	1	C	C	C	C	C	C	C	C	T	C	C	C	ECH74115_2013	1909561	1911319	1758	348	GTC	V	GTT	V	conserved hypothetical protein	transition
CP001164	1913504	SYN	1	T	T	T	T	T	T	T	T	T	T	T	C	ECH74115_2016	1913481	1917384	3903	24	ACT	T	ACC	T	ATP-dependent helicase HrpA	transition
CP001164	1913771	SYN	1	A	A	A	A	A	A	A	A	A	A	A	C	ECH74115_2016	1913481	1917384	3903	291	ATA	I	ATC	I	ATP-dependent helicase HrpA	transversion
CP001164	1917362	SYN	1	A	G	G	G	G	G	G	G	G	A	G	G	ECH74115_2016	1913481	1917384	3903	3882	GCA	A	GCG	A	ATP-dependent helicase HrpA	transition
CP001164	1918935	intergenic	1	G	G	G	G	G	G	G	G	G	G	G	T	intergenic	--	--	--	--	--	--			intergenic	transversion
CP001164	1918936	intergenic	1	G	G	G	G	G	G	G	G	G	G	G	A	intergenic	--	--	--	--	--	--			intergenic	transition
CP001164	1920142	intergenic	1	C	C	C	C	C	C	C	C	A	C	C	C	intergenic	--	--	--	--	--	--			intergenic	transversion
CP001164	1920295	intergenic	1	G	G	G	G	G	G	G	G	G	G	A	A	intergenic	--	--	--	--	--	--			intergenic	transition
CP001164	1926187	NSYN	1	T	C	C	C	C	C	C	C	C	T	C	C	ECH74115_2026	1924797	1926210	1413	1391	CTA	L	CCA	P	methyl-accepting chemotaxis protein III	transition
CP001164	1927430	NSYN	1	C	C	C	C	C	C	C	C	C	C	T	C	ECH74115_2028	1927387	1928731	1344	44	TCG	S	TTG	L	conserved hypothetical protein	transition
CP001164	1928616	NSYN	1	C	C	C	C	C	C	C	C	C	C	C	A	ECH74115_2028	1927387	1928731	1344	1230	CAC	H	CAA	Q	conserved hypothetical protein	transversion
CP001164	1929043	NSYN	1	C	C	C	C	C	C	C	C	C	C	C	T	ECH74115_2029	1928991	1930611	1620	53	GCA	A	GTA	V	periplasmic glucan biosynthesis protein, MdoG	transition
CP001164	1929344	NSYN	1	A	A	A	A	A	A	A	A	A	A	T	A	ECH74115_2029	1928991	1930611	1620	354	GAA	E	GAT	D	periplasmic glucan biosynthesis protein, MdoG	transversion
CP001164	1931333	intergenic	1	A	A	A	A	A	A	A	A	A	A	A	G	intergenic	--	--	--	--	--	--			intergenic	transition
CP001164	1931693	SYN	1	G	G	G	G	G	G	G	G	G	G	A	G	ECH74115_2032	1932548	1931568	981	856	ATG	M	ATG	M	conserved hypothetical protein	transition
CP001164	1933034	SYN	1	C	C	C	C	C	C	C	C	C	C	T	C	ECH74115_2034	1932672	1933665	993	363	GCC	A	GCT	A	tellurite resistance protein TehA	transition
CP001164	1936900	SYN	1	C	C	C	C	C	C	C	C	T	C	C	C	ECH74115_2039	1936526	1937063	537	375	GTC	V	GTT	V	DNA-binding protein	transition
CP001164	1940224	SYN	1	C	A	A	A	A	A	A	A	A	C	C	C	ECH74115_2043	1939841	1940279	438	384	GCC	A	GCA	A	conserved hypothetical protein	transversion
CP001164	1944641	NSYN	1	G	A	A	A	A	A	G	G	G	G	G	G	ECH74115_2047	1944185	1945127	942	457	GCT	A	ACT	T	ABC transporter, permease protein	transition
CP001164	1945308	NSYN	1	G	G	G	G	G	G	G	G	G	G	G	A	ECH74115_2048	1945116	1945911	795	193	GTG	V	ATG	M	ABC transporter, permease protein	transition
CP001164	1945506	NSYN	1	T	C	C	C	C	C	C	C	C	T	C	C	ECH74115_2048	1945116	1945911	795	391	TCG	S	CCG	P	ABC transporter, permease protein	transition
CP001164	1947767	NSYN	1	G	T	T	T	T	T	G	G	G	G	G	G	ECH74115_2051	1947695	1947917	222	73	GTT	V	TTT	F	conserved hypothetical protein	transversion
CP001164	1947931	intergenic	1	C	C	C	C	C	C	C	C	C	C	C	T	intergenic	--	--	--	--	--	--			intergenic	transition
CP001164	1948492	NSYN	1	A	A	A	A	A	A	T	A	A	A	A	A	ECH74115_2053	1948685	1948236	450	194	CAG	Q	CTG	L	putative membrane protein	transversion
CP001164	1948622	NSYN	1	A	A	A	A	A	A	A	A	A	A	A	T	ECH74115_2053	1948685	1948236	450	64	CGA	R	TGA	*	putative membrane protein	transversion
CP001164	1956157	SYN	1	A	C	A	A	A	A	A	A	A	A	A	A	ECH74115_2059	1956336	1954837	1500	180	ACC	T	ACC	T	L-asparagine permease	transversion
CP001164	1956559	intergenic	1	T	T	T	T	T	T	T	T	T	T	T	G	intergenic	--	--	--	--	--	--			intergenic	transversion
CP001164	1964220	SYN	1	T	T	T	T	T	T	T	T	T	T	T	C	ECH74115_2065	1960504	1964707	4203	3717	AAT	N	AAC	N	protein rhsD	transition
CP001164	1965381	intergenic	1	A	A	A	A	A	A	A	A	A	A	G	G	intergenic	--	--	--	--	--	--			intergenic	transition
CP001164	1967003	NSYN	1	C	C	C	C	C	C	C	C	C	C	C	A	ECH74115_2070	1966888	1967116	228	116	TCG	S	TAG	*	tautomerase enzyme family protein	transversion
CP001164	1967566	intergenic	1	T	T	T	T	T	T	T	T	T	T	T	C	intergenic	--	--	--	--	--	--			intergenic	transition
CP001164	1969265	SYN	1	T	T	T	T	T	T	T	T	A	T	T	T	ECH74115_2074	1969694	1968801	894	430	AGT	S	AGT	S	phenazine biosynthesis protein PhzF family protein	transversion
CP001164	1969691	SYN	1	C	T	T	T	T	T	T	T	T	C	T	T	ECH74115_2074	1969694	1968801	894	4	TTC	F	TTC	F	phenazine biosynthesis protein PhzF family protein	transition
CP001164	1972859	NSYN	1	T	T	T	T	T	T	T	T	T	T	T	C	ECH74115_2078	1976426	1972686	3741	3568	AAT	N	CAT	H	nitrate reductase 2, alpha subunit	transition
CP001164	1974676	NSYN	1	C	C	C	C	C	C	C	T	C	C	C	C	ECH74115_2078	1976426	1972686	3741	1751	GCG	A	GTG	V	nitrate reductase 2, alpha subunit	transition
CP001164	1974768	SYN	1	G	G	G	G	G	G	G	G	G	G	G	A	ECH74115_2078	1976426	1972686	3741	1659	GTT	V	GTA	V	nitrate reductase 2, alpha subunit	transition
CP001164	1974961	NSYN	1	T	T	T	T	T	T	G	T	T	T	T	T	ECH74115_2078	1976426	1972686	3741	1466	ATC	I	AGC	S	nitrate reductase 2, alpha subunit	transversion
CP001164	1975059	SYN	1	G	A	A	A	A	A	G	G	G	G	G	G	ECH74115_2078	1976426	1972686	3741	1368	GGG	G	GGA	G	nitrate reductase 2, alpha subunit	transition
CP001164	1976753	SYN	1	T	T	T	T	T	T	T	T	T	T	T	C	ECH74115_2079	1977896	1976508	1389	1144	CAT	H	CAT	H	nitrite extrusion protein 2	transition
CP001164	1978276	NSYN	1	C	C	C	C	C	C	C	C	C	C	C	T	ECH74115_2080	1979461	1978202	1260	1186	CTC	L	TTC	F	leucine-rich repeat protein	transition
CP001164	1979292	NSYN	1	C	T	T	T	T	T	T	T	T	C	T	T	ECH74115_2080	1979461	1978202	1260	170	GCT	A	GTT	V	leucine-rich repeat protein	transition
CP001164	1981758	NSYN	1	C	C	C	C	C	C	C	T	C	C	C	C	ECH74115_2083	1982051	1980951	1101	294	CAG	Q	CAT	H	gram-negative porin family protein	transition
CP001164	1982089	intergenic	1	T	T	T	T	T	T	T	T	T	T	T	C	intergenic	--	--	--	--	--	--			intergenic	transition
CP001164	1982109	intergenic	1	G	G	G	G	G	G	G	G	G	G	A	G	intergenic	--	--	--	--	--	--			intergenic	transition
CP001164	1982110	intergenic	1	C	C	C	C	C	C	C	C	C	C	C	T	intergenic	--	--	--	--	--	--			intergenic	transition
CP001164	1982122	intergenic	1	G	G	G	G	G	G	G	G	G	G	G	A	intergenic	--	--	--	--	--	--			intergenic	transition
CP001164	1982130	intergenic	1	G	G	G	G	G	G	G	G	G	G	G	T	intergenic	--	--	--	--	--	--			intergenic	transversion
CP001164	1982183	intergenic	1	A	A	A	A	A	A	A	A	A	A	A	G	intergenic	--	--	--	--	--	--			intergenic	transition
CP001164	1983789	intergenic	1	C	C	C	C	C	C	C	C	C	C	T	C	intergenic	--	--	--	--	--	--			intergenic	transition
CP001164	1986742	NSYN	1	A	A	A	A	A	A	A	G	A	A	A	A	ECH74115_2087	1986489	1987368	879	254	CAG	Q	CGG	R	formate dehydrogenase, nitrate-inducible, iron-sulfur subunit	transition
CP001164	1987778	NSYN	1	C	C	C	C	C	C	T	C	C	C	C	C	ECH74115_2088	1987360	1988014	654	419	GCG	A	GTG	V	formate dehydrogenase, gamma subunit	transition
CP001164	1989260	NSYN	1	C	T	C	C	C	C	C	C	C	C	C	C	ECH74115_2090	1989681	1988671	1011	422	GCT	A	GTT	V	oxidoreductase, zinc-binding dehydrogenase family	transition
CP001164	1990420	NSYN	1	T	T	T	T	T	T	T	T	T	T	T	A	ECH74115_2091	1991512	1989815	1698	1093	CCT	P	ACT	T	malate dehydrogenase	transversion
CP001164	1992330	intergenic	1	C	C	C	C	C	C	C	C	C	C	C	T	intergenic	--	--	--	--	--	--			intergenic	transition
CP001164	1994247	NSYN	1	T	T	T	T	T	T	T	T	T	T	T	G	ECH74115_2096	1994860	1993874	987	614	GTC	V	GGC	G	ABC transporter, ATP-binding protein	transversion
CP001164	1995101	NSYN	1	A	G	G	G	G	G	G	G	G	A	G	G	ECH74115_2097	1995753	1994857	897	653	TAC	Y	TGC	C	inner membrane ABC transporter permease protein yddQ	transition
CP001164	2000116	intergenic	1	G	G	G	G	G	G	G	G	G	G	G	T	intergenic	--	--	--	--	--	--			intergenic	transversion
CP001164	2002979	intergenic	1	A	A	A	A	A	A	A	A	A	A	C	A	intergenic	--	--	--	--	--	--			intergenic	transversion
CP001164	2006325	SYN	1	A	A	A	A	A	A	A	A	A	A	A	G	ECH74115_2105	2006335	2004800	1536	11	TAA	*	TGA	*	glutamate:gamma aminobutyrate antiporter	transition
CP001164	2006449	intergenic	1	C	C	C	C	C	C	C	C	C	C	C	T	intergenic	--	--	--	--	--	--			intergenic	transition
CP001164	2010043	SYN	1	G	G	G	G	G	G	G	G	G	G	A	G	ECH74115_2107	2011035	2008252	2784	993	GCG	A	GCA	A	peptidase, M16B family	transition
CP001164	2012378	NSYN	1	C	C	C	C	C	C	C	C	C	C	C	T	ECH74115_2108	2013464	2011092	2373	1087	ATC	I	TTC	F	TonB-dependent receptor	transition
CP001164	2014663	SYN	1	G	A	A	A	A	A	G	G	G	G	G	G	ECH74115_2109	2015187	2013502	1686	525	GCT	A	GCA	A	inner membrane ABC transporter ATP-binding protein	transition
CP001164	2015402	intergenic	1	T	C	C	C	C	C	C	C	C	T	C	C	intergenic	--	--	--	--	--	--			intergenic	transition
CP001164	2016898	intergenic	1	T	G	G	G	G	G	G	G	G	T	G	G	intergenic	--	--	--	--	--	--			intergenic	transversion
CP001164	2018518	intergenic	1	G	A	A	A	A	A	A	A	A	G	G	G	intergenic	--	--	--	--	--	--			intergenic	transition
CP001164	2018962	NSYN	1	T	T	T	T	T	T	T	T	T	T	T	G	ECH74115_2112	2019534	2018773	762	573	TTT	F	TTG	L	transcriptional regulator, AraC family	transversion
CP001164	2019997	intergenic	1	A	A	A	A	A	A	A	A	A	A	A	G	intergenic	--	--	--	--	--	--			intergenic	transition
CP001164	2024093	intergenic	1	T	T	T	T	T	T	T	T	T	T	T	G	intergenic	--	--	--	--	--	--			intergenic	transversion
CP001164	2025217	NSYN	1	C	C	C	C	T	T	C	C	C	C	C	C	ECH74115_2118	2026922	2024700	2223	1706	GCC	A	GTC	V	fimbrial usher family protein	transition
CP001164	2025757	NSYN	1	C	T	C	C	C	C	C	C	C	C	C	C	ECH74115_2118	2026922	2024700	2223	1166	ACC	T	ATC	I	fimbrial usher family protein	transition
CP001164	2026277	NSYN	1	T	T	T	T	T	T	T	C	T	T	T	T	ECH74115_2118	2026922	2024700	2223	646	ACT	T	CCT	P	fimbrial usher family protein	transition
CP001164	2027466	NSYN	1	G	G	G	G	G	G	A	G	G	G	G	G	ECH74115_2119	2028103	2027393	711	638	GGT	G	GAT	D	periplasmic pilus chaperone family protein	transition
CP001164	2027651	NSYN	1	C	C	C	C	C	C	C	C	C	C	C	T	ECH74115_2119	2028103	2027393	711	453	CAG	Q	CAT	H	periplasmic pilus chaperone family protein	transition
CP001164	2028418	intergenic	1	C	C	C	C	C	C	C	T	C	C	C	C	intergenic	--	--	--	--	--	--			intergenic	transition
CP001164	2028421	intergenic	1	C	C	C	C	C	C	A	C	C	C	C	C	intergenic	--	--	--	--	--	--			intergenic	transversion
CP001164	2029506	intergenic	1	A	A	A	A	A	A	A	A	G	A	A	A	intergenic	--	--	--	--	--	--			intergenic	transition
CP001164	2029945	intergenic	1	G	A	G	G	G	G	G	G	G	G	G	G	intergenic	--	--	--	--	--	--			intergenic	transition
CP001164	2032605	NSYN	1	A	G	G	G	G	G	G	G	G	A	G	G	ECH74115_2123	2036471	2032578	3894	3867	AGT	S	AGG	R	hypothetical protein	transition
CP001164	2033129	NSYN	1	C	C	C	C	C	C	C	C	A	C	C	C	ECH74115_2123	2036471	2032578	3894	3343	GGC	G	AGC	S	hypothetical protein	transversion
CP001164	2033312	SYN	1	A	A	A	A	A	A	A	A	A	A	C	A	ECH74115_2123	2036471	2032578	3894	3160	CGA	R	CGA	R	hypothetical protein	transversion
CP001164	2034390	SYN	1	C	C	C	C	C	C	C	C	T	C	C	C	ECH74115_2123	2036471	2032578	3894	2082	CCC	P	CCT	P	hypothetical protein	transition
CP001164	2040196	NSYN	1	T	T	T	T	T	T	T	T	T	T	T	C	ECH74115_2126	2040013	2041549	1536	184	TCT	S	CCT	P	autoinducer-2 ABC transporter, ATP-binding protein LsrA	transition
CP001164	2041036	NSYN	1	T	T	T	T	T	T	T	T	T	T	T	C	ECH74115_2126	2040013	2041549	1536	1024	TAT	Y	CAT	H	autoinducer-2 ABC transporter, ATP-binding protein LsrA	transition
CP001164	2041171	NSYN	1	C	C	C	C	C	C	C	C	C	C	C	T	ECH74115_2126	2040013	2041549	1536	1159	CGT	R	TGT	C	autoinducer-2 ABC transporter, ATP-binding protein LsrA	transition
CP001164	2041357	NSYN	1	A	A	A	A	A	A	A	A	A	A	A	C	ECH74115_2126	2040013	2041549	1536	1345	ATC	I	CTC	L	autoinducer-2 ABC transporter, ATP-binding protein LsrA	transversion
CP001164	2043810	SYN	1	C	C	C	C	C	C	C	T	C	C	C	C	ECH74115_2129	2043574	2044597	1023	237	AAC	N	AAT	N	autoinducer-2 ABC transporter, periplasmic autoinducer-2-binding protein LsrB	transition
CP001164	2049034	NSYN	1	T	T	T	G	T	T	T	T	T	T	T	T	ECH74115_2134	2049193	2047742	1452	160	AAT	N	GAT	D	tagaturonate reductase	transversion
CP001164	2049204	intergenic	1	C	C	C	C	C	C	T	C	C	C	C	C	intergenic	--	--	--	--	--	--			intergenic	transition
CP001164	2049218	intergenic	1	T	T	T	T	T	T	C	T	T	T	T	T	intergenic	--	--	--	--	--	--			intergenic	transition
CP001164	2049230	intergenic	1	G	G	G	G	G	G	G	G	G	G	G	A	intergenic	--	--	--	--	--	--			intergenic	transition
CP001164	2049268	intergenic	1	A	A	A	A	A	A	C	A	A	A	A	A	intergenic	--	--	--	--	--	--			intergenic	transversion
CP001164	2050772	SYN	1	C	C	C	C	C	C	C	C	A	C	C	C	ECH74115_2135	2050838	2049420	1419	67	AGC	S	AGC	S	diguanylate cyclase (GGDEF) domain protein	transversion
CP001164	2050946	intergenic	1	G	G	G	G	G	G	G	G	G	G	G	A	intergenic	--	--	--	--	--	--			intergenic	transition
CP001164	2051061	NSYN	1	A	A	A	A	A	A	A	A	A	A	A	C	ECH74115_2136	2051336	2050977	360	276	ATG	M	ATC	I	conserved hypothetical protein	transversion
CP001164	2051067	NSYN	1	G	G	G	G	G	G	G	G	G	G	G	A	ECH74115_2136	2051336	2050977	360	270	GAT	D	GAA	E	conserved hypothetical protein	transition
CP001164	2052822	NSYN	1	T	T	T	T	T	T	T	T	T	T	T	C	ECH74115_2138	2053714	2052326	1389	893	GTC	V	GCC	A	aldehyde dehydrogenase (NAD) family protein	transition
CP001164	2052905	SYN	1	T	C	C	C	C	C	C	C	C	T	C	C	ECH74115_2138	2053714	2052326	1389	810	TGC	C	TGC	C	aldehyde dehydrogenase (NAD) family protein	transition
CP001164	2054607	NSYN	1	G	G	G	G	G	G	G	G	G	G	G	C	ECH74115_2139	2053815	2054697	882	793	GTC	V	CTC	L	transcriptional regulator, LysR family	transversion
CP001164	2055270	intergenic	1	G	A	G	G	G	G	G	G	G	G	G	G	intergenic	--	--	--	--	--	--			intergenic	transition
CP001164	2055748	intergenic	1	T	T	T	T	T	T	T	T	T	T	T	C	intergenic	--	--	--	--	--	--			intergenic	transition
CP001164	2055930	intergenic	1	G	G	G	G	G	G	G	G	G	G	G	A	intergenic	--	--	--	--	--	--			intergenic	transition
CP001164	2057118	NSYN	1	T	G	G	G	G	G	G	G	G	T	G	G	ECH74115_2142	2056040	2057231	1191	1079	TTG	L	TGG	W	sugar efflux transporter SotB	transversion
CP001164	2057263	SYN	1	T	T	T	T	T	T	T	T	T	T	T	A	ECH74115_2143	2057920	2057255	666	658	ATT	I	ATT	I	multiple antibiotic resistance protein MarC	transversion
CP001164	2058381	NSYN	1	G	G	G	G	G	G	G	A	G	G	G	G	ECH74115_2144	2058132	2058567	435	250	GTA	V	ATA	I	multiple antibiotic resistance protein MarR	transition
CP001164	2059776	NSYN	1	G	G	G	G	G	G	G	G	G	G	G	A	ECH74115_2147	2060149	2059250	900	374	AGA	R	AAA	K	transporter, 10 TMS drug/metabolite exporter (DME) family	transition
CP001164	2062653	NSYN	1	C	C	C	C	C	C	C	T	C	C	C	C	ECH74115_2150	2062041	2063034	993	613	CAG	Q	TAG	*	transcriptional activator FtrA	transition
CP001164	2064162	SYN	1	T	T	T	T	T	T	T	T	T	T	T	C	ECH74115_2151	2064345	2063455	891	184	CCT	P	CCT	P	diguanylate cyclase (GGDEF) domain protein	transition
CP001164	2064630	SYN	1	G	A	A	A	A	A	A	A	A	G	G	G	ECH74115_2152	2064992	2064600	393	363	GGC	G	GGA	G	conserved hypothetical protein TIGR00156	transition
CP001164	2070999	NSYN	1	A	A	A	A	A	A	A	A	A	A	A	G	ECH74115_2158	2071410	2069950	1461	412	TAA	*	GAA	E	mannitol dehydrogenase family protein	transition
CP001164	2115808	NSYN	1	T	T	T	T	T	T	T	T	T	T	T	C	ECH74115_2225	2116079	2115657	423	272	TTG	L	TCG	S	transposase	transition
CP001164	2161500	SYN	1	G	G	G	G	G	G	G	G	G	G	G	C	ECH74115_2291	2161770	2161444	327	271	CGG	R	CGG	R	conserved hypothetical protein	transversion
CP001164	2162832	SYN	1	C	C	C	C	C	C	C	C	A	C	C	C	ECH74115_2293	2162281	2162842	561	552	ACC	T	ACA	T	diamine N-acetyltransferase	transversion
CP001164	2164089	intergenic	1	A	A	A	A	A	A	A	A	A	A	A	G	intergenic	--	--	--	--	--	--			intergenic	transition
CP001164	2164093	intergenic	1	T	T	T	T	T	T	T	T	C	T	T	T	intergenic	--	--	--	--	--	--			intergenic	transition
CP001164	2165731	SYN	1	T	C	C	C	C	C	C	C	C	T	C	C	ECH74115_2296	2164166	2166593	2427	1566	ACT	T	ACC	T	anaerobic dimethyl sulfoxide reductase, A subunit YnfE	transition
CP001164	2169991	NSYN	1	G	G	G	G	G	G	G	G	G	G	A	G	ECH74115_2299	2169706	2170561	855	286	GTT	V	ATT	I	anaerobic dimethyl sulfoxide reductase, C subunit	transition
CP001164	2171936	NSYN	1	G	G	G	G	G	G	A	G	G	G	G	G	ECH74115_2303	2171411	2172668	1257	526	GGC	G	AGC	S	chloride transporter, chloride channel (ClC) family	transition
CP001164	2173351	intergenic	1	C	C	C	C	C	C	C	C	C	C	T	C	intergenic	--	--	--	--	--	--			intergenic	transition
CP001164	2173692	SYN	1	C	C	C	C	C	C	C	C	T	C	C	C	ECH74115_2304	2174660	2173440	1221	969	CCC	P	CCT	P	transcriptional regulator Mic	transition
CP001164	2173773	SYN	1	G	G	G	G	G	G	G	G	G	G	G	A	ECH74115_2304	2174660	2173440	1221	888	GGT	G	GGA	G	transcriptional regulator Mic	transition
CP001164	2174549	SYN	0.333333	G	G	G	G	G	G	G	G	G	G	G	A	ECH74115_2304	2174660	2173440	1221	112	ACG	T	ACG	T	transcriptional regulator Mic	transition
CP001164	2176501	NSYN	1	G	G	G	G	G	G	G	G	G	G	G	A	ECH74115_2306	2175795	2177049	1254	707	CGT	R	CAT	H	major facilitator family transporter	transition
CP001164	2177313	intergenic	1	C	C	C	T	C	C	C	C	C	C	C	C	intergenic	--	--	--	--	--	--			intergenic	transition
CP001164	2177418	intergenic	1	C	C	C	C	C	C	C	C	C	C	C	A	intergenic	--	--	--	--	--	--			intergenic	transversion
CP001164	2180021	NSYN	1	C	C	C	C	C	C	C	C	C	C	C	A	ECH74115_2311	2180009	2181044	1035	13	CTC	L	ATC	I	putative permease, PerM family	transversion
CP001164	2180632	SYN	1	C	C	C	C	C	C	C	T	C	C	C	C	ECH74115_2311	2180009	2181044	1035	624	GGC	G	GGT	G	putative permease, PerM family	transition
CP001164	2180961	NSYN	1	C	C	C	C	C	C	C	C	C	C	G	C	ECH74115_2311	2180009	2181044	1035	953	ACA	T	AGA	R	putative permease, PerM family	transversion
CP001164	2183960	NSYN	1	G	G	G	G	G	G	G	G	G	G	G	T	ECH74115_2313	2184053	2182467	1587	94	GGG	G	TGG	W	NAD(P) transhydrogenase, alpha subunit	transversion
CP001164	2184412	intergenic	1	T	T	T	T	T	T	T	T	T	T	C	T	intergenic	--	--	--	--	--	--			intergenic	transition
CP001164	2184870	SYN	1	T	T	T	T	T	T	G	T	T	T	T	T	ECH74115_2314	2184523	2185468	945	348	GTT	V	GTG	V	YdgH protein	transversion
CP001164	2196433	SYN	1	A	A	A	A	A	A	A	A	A	A	A	G	ECH74115_2324	2195948	2197457	1509	486	CTA	L	CTG	L	conserved hypothetical protein	transition
CP001164	2196437	NSYN	1	T	T	T	T	T	T	T	T	T	T	C	T	ECH74115_2324	2195948	2197457	1509	490	TAC	Y	CAC	H	conserved hypothetical protein	transition
CP001164	2196666	NSYN	1	T	A	A	A	A	A	A	A	A	T	A	A	ECH74115_2324	2195948	2197457	1509	719	GTA	V	GAA	E	conserved hypothetical protein	transversion
CP001164	2200042	NSYN	1	C	C	C	C	C	C	C	C	C	C	C	A	ECH74115_2327	2200177	2198804	1374	136	CGC	R	AGC	S	glucuronide permease uidB	transversion
CP001164	2202229	intergenic	1	G	G	G	G	G	G	G	G	G	G	G	A	intergenic	--	--	--	--	--	--			intergenic	transition
CP001164	2203407	SYN	1	G	G	G	G	G	G	G	A	G	G	G	G	ECH74115_2331	2203964	2203197	768	558	GCC	A	GCA	A	oxidoreductase, short chain dehydrogenase/reductase family	transition
CP001164	2204055	intergenic	1	G	G	G	G	G	G	G	G	G	G	G	T	intergenic	--	--	--	--	--	--			intergenic	transversion
CP001164	2204807	NSYN	1	C	G	G	G	G	G	G	G	G	C	G	G	ECH74115_2332	2205104	2204076	1029	298	AAC	N	GAC	D	maltose regulon regulatory protein MalI	transversion
CP001164	2209675	NSYN	1	A	G	G	G	G	G	G	G	G	A	G	G	ECH74115_2336	2210234	2209194	1041	560	CAT	H	CGT	R	oxidoreductase, NAD-binding	transition
CP001164	2210829	intergenic	1	C	C	C	C	C	C	C	C	C	C	C	T	intergenic	--	--	--	--	--	--			intergenic	transition
CP001164	2212235	SYN	1	T	T	T	T	T	T	C	T	T	T	T	T	ECH74115_2339	2211693	2212275	582	543	TCT	S	TCC	S	electron transport complex, RnfABCDGE type, A subunit	transition
CP001164	2212770	NSYN	1	C	C	C	C	C	C	C	C	C	C	C	A	ECH74115_2340	2212274	2212853	579	497	CCG	P	CAG	Q	electron transport complex, RnfABCDGE type, B subunit	transversion
CP001164	2214235	NSYN	1	A	T	T	T	T	T	T	T	T	A	A	A	ECH74115_2341	2212845	2215164	2319	1391	CAG	Q	CTG	L	electron transport complex protein RnfC	transversion
CP001164	2215820	SYN	1	T	T	T	T	T	T	C	T	T	T	T	T	ECH74115_2342	2215164	2216223	1059	657	GGT	G	GGC	G	electron transport complex, RnfABCDGE type, D subunit	transition
CP001164	2217848	NSYN	1	A	A	A	A	A	A	A	A	A	A	A	G	ECH74115_2345	2217545	2218181	636	304	AGC	S	GGC	G	endonuclease III	transition
CP001164	2218352	intergenic	1	A	A	A	A	A	A	A	A	A	A	A	C	intergenic	--	--	--	--	--	--			intergenic	transversion
CP001164	2218445	intergenic	1	A	G	G	G	G	G	G	G	G	A	A	A	intergenic	--	--	--	--	--	--			intergenic	transition
CP001164	2219409	NSYN	1	A	T	T	T	T	T	T	T	T	A	T	T	ECH74115_2346	2218791	2220294	1503	619	AAC	N	TAC	Y	tripeptide permease TppB	transversion
CP001164	2221249	SYN	1	A	A	A	A	A	A	A	A	A	A	A	T	ECH74115_2348	2221908	2221048	861	660	ACC	T	ACT	T	pyridoxal kinase	transversion
CP001164	2221882	NSYN	1	A	A	A	A	A	A	A	C	A	A	A	A	ECH74115_2348	2221908	2221048	861	27	AGA	R	AGC	S	pyridoxal kinase	transversion
CP001164	2222878	NSYN	1	C	C	C	C	C	C	C	C	C	C	C	T	ECH74115_2349	2223244	2221970	1275	367	CGC	R	TGC	C	tyrosyl-tRNA synthetase	transition
CP001164	2224295	SYN	1	C	C	C	C	C	C	C	C	C	C	C	T	ECH74115_2351	2224411	2224088	324	117	CGG	R	CGT	R	putative lipoprotein	transition
CP001164	2224816	NSYN	1	A	A	A	A	A	A	A	A	A	A	A	T	ECH74115_2352	2225624	2224515	1110	809	CAG	Q	CTG	L	anhydro-N-acetylmuramic acid kinase	transversion
CP001164	2226447	NSYN	1	A	T	T	T	T	T	T	A	A	A	A	A	ECH74115_2354	2226845	2226411	435	399	AAG	K	AAT	N	transcriptional regulator SlyA	transversion
CP001164	2226989	intergenic	1	G	G	G	G	G	G	G	G	G	G	G	C	intergenic	--	--	--	--	--	--			intergenic	transversion
CP001164	2227544	NSYN	1	C	C	C	C	C	C	C	T	C	C	C	C	ECH74115_2356	2227285	2228143	858	260	GCA	A	GTA	V	auxiliary transport protein, membrane fusion protein (MFP) family	transition
CP001164	2229687	NSYN	1	G	G	A	G	G	G	G	G	G	G	G	G	ECH74115_2357	2228163	2230155	1992	1525	GCT	A	ACT	T	fusaric acid resistance domain protein	transition
CP001164	2229858	NSYN	1	A	A	A	A	A	A	A	A	A	A	A	G	ECH74115_2357	2228163	2230155	1992	1696	ATA	I	GTA	V	fusaric acid resistance domain protein	transition
CP001164	2232023	intergenic	1	T	T	T	T	T	T	C	T	T	T	T	T	intergenic	--	--	--	--	--	--			intergenic	transition
CP001164	2232582	NSYN	1	A	C	C	C	C	C	C	C	C	A	C	C	ECH74115_2361	2232044	2232644	600	539	TAC	Y	TCC	S	transcriptional regulator, TetR family	transversion
CP001164	2233173	NSYN	1	G	G	G	G	G	G	G	G	G	G	G	A	ECH74115_2362	2232680	2233778	1098	494	CGT	R	CAT	H	N-ethylmaleimide reductase	transition
CP001164	2234595	SYN	1	T	T	T	T	T	T	T	T	T	T	T	C	ECH74115_2364	2234368	2235016	648	228	GCT	A	GCC	A	ribonuclease T	transition
CP001164	2237195	SYN	1	T	T	T	T	T	T	T	T	T	T	C	C	ECH74115_2365	2235108	2239725	4617	2088	GAT	D	GAC	D	DEAD/DEAH box helicase family protein Lhr	transition
CP001164	2240622	NSYN	1	A	A	A	A	A	A	A	A	A	A	A	C	ECH74115_2367	2240457	2241273	816	166	ACC	T	CCC	P	NlpC/P60 family protein	transversion
CP001164	2240766	NSYN	1	T	C	C	C	C	C	C	T	T	T	T	T	ECH74115_2367	2240457	2241273	816	310	TTT	F	CTT	L	NlpC/P60 family protein	transition
CP001164	2242429	SYN	1	T	T	T	T	T	T	T	T	T	T	T	C	ECH74115_2369	2243296	2242127	1170	868	CTT	L	CTT	L	transporter, major facilitator family	transition
CP001164	2244044	SYN	1	A	A	A	A	A	A	A	A	A	A	G	A	ECH74115_2372	2243850	2244876	1026	195	CTA	L	CTG	L	transcriptional repressor PurR	transition
CP001164	2246540	SYN	1	T	T	T	T	T	T	T	T	T	T	T	C	ECH74115_2373	2245917	2247129	1212	624	AAT	N	AAC	N	drug resistance transporter, Bcr/CflA subfamily	transition
CP001164	2248624	NSYN	1	A	A	A	A	A	A	A	A	A	A	G	G	ECH74115_2375	2249248	2248607	642	625	TGA	*	GGA	G	riboflavin synthase, alpha subunit	transition
CP001164	2249498	SYN	1	A	G	G	G	G	G	G	A	A	A	A	A	ECH74115_2376	2249463	2250837	1374	36	TTA	L	TTG	L	multidrug resistance protein MdtK	transition
CP001164	2250787	NSYN	1	A	A	A	A	A	A	A	A	A	A	A	T	ECH74115_2376	2249463	2250837	1374	1325	TAC	Y	TTC	F	multidrug resistance protein MdtK	transversion
CP001164	2251221	NSYN	1	G	T	T	T	T	T	T	T	T	G	T	T	ECH74115_2377	2252133	2250877	1257	913	AAG	K	TAG	*	conserved hypothetical protein	transversion
CP001164	2252101	SYN	1	G	G	G	G	G	G	G	G	G	G	G	A	ECH74115_2377	2252133	2250877	1257	33	GTC	V	GTA	V	conserved hypothetical protein	transition
CP001164	2252186	intergenic	1	G	G	G	G	G	G	G	G	G	G	G	T	intergenic	--	--	--	--	--	--			intergenic	transversion
CP001164	2252216	intergenic	1	A	A	A	A	A	A	A	A	A	A	A	T	intergenic	--	--	--	--	--	--			intergenic	transversion
CP001164	2252397	intergenic	1	C	C	C	C	C	C	C	C	T	C	C	C	intergenic	--	--	--	--	--	--			intergenic	transition
CP001164	2252605	intergenic	1	G	G	G	G	G	G	G	G	G	G	C	C	intergenic	--	--	--	--	--	--			intergenic	transversion
CP001164	2252920	NSYN	1	A	A	A	A	A	A	A	A	A	A	A	G	ECH74115_2380	2252706	2253012	306	215	CAA	Q	CGA	R	YdhR protein	transition
CP001164	2253213	NSYN	1	T	C	C	C	C	C	C	C	C	T	C	C	ECH74115_2381	2253137	2254742	1605	77	CTA	L	CCA	P	conserved hypothetical protein	transition
CP001164	2253315	NSYN	1	T	T	T	T	T	T	T	T	A	T	T	T	ECH74115_2381	2253137	2254742	1605	179	ATT	I	AAT	N	conserved hypothetical protein	transversion
CP001164	2254503	NSYN	1	C	C	C	C	C	C	C	C	C	C	C	T	ECH74115_2381	2253137	2254742	1605	1367	CCT	P	CTT	L	conserved hypothetical protein	transition
CP001164	2257183	NSYN	1	G	G	G	G	G	G	G	G	G	G	G	A	ECH74115_2385	2257721	2257083	639	539	CGA	R	CAA	Q	conserved hypothetical protein	transition
CP001164	2257311	SYN	1	A	A	A	A	A	A	A	A	A	A	A	T	ECH74115_2385	2257721	2257083	639	411	ATA	I	ATT	I	conserved hypothetical protein	transversion
CP001164	2258495	SYN	1	A	A	A	A	A	A	A	A	A	A	A	G	ECH74115_2386	2259836	2257734	2103	1342	GCA	A	GCA	A	aldehyde ferredoxin oxidoreductase	transition
CP001164	2260547	NSYN	1	A	A	A	A	A	A	A	A	G	A	A	A	ECH74115_2388	2260511	2260649	138	37	ACT	T	GCT	A	hypothetical protein	transition
CP001164	2260632	NSYN	1	T	T	T	T	T	T	T	T	C	T	T	T	ECH74115_2388	2260511	2260649	138	122	CTA	L	CCA	P	hypothetical protein	transition
CP001164	2260703	intergenic	1	A	A	A	A	A	A	A	A	A	A	G	A	intergenic	--	--	--	--	--	--			intergenic	transition
CP001164	2260821	intergenic	1	T	C	C	C	C	C	C	C	C	T	T	T	intergenic	--	--	--	--	--	--			intergenic	transition
CP001164	2261304	intergenic	1	T	G	G	G	G	G	T	T	T	T	T	T	intergenic	--	--	--	--	--	--			intergenic	transversion
CP001164	2262826	SYN	1	T	C	C	C	C	C	C	C	C	T	C	C	ECH74115_2390	2261705	2263118	1413	1122	ATT	I	ATC	I	pyruvate kinase I	transition
CP001164	2268365	SYN	1	C	C	C	C	C	C	C	C	C	C	A	C	ECH74115_2396	2268518	2267772	747	154	ATC	I	ATC	I	FeS assembly ATPase SufC	transversion
CP001164	2269408	NSYN	1	A	A	A	A	A	A	A	A	A	A	G	G	ECH74115_2397	2270015	2268528	1488	608	GAC	D	GGC	G	FeS assembly protein SufB	transition
CP001164	2270468	intergenic	1	G	G	G	G	G	G	G	G	G	G	G	C	intergenic	--	--	--	--	--	--			intergenic	transversion
CP001164	2270760	intergenic	1	A	G	G	G	G	G	A	A	A	A	A	A	intergenic	--	--	--	--	--	--			intergenic	transition
CP001164	2270773	intergenic	1	G	G	G	G	G	G	G	G	A	G	G	G	intergenic	--	--	--	--	--	--			intergenic	transition
CP001164	2274531	SYN	1	T	T	T	T	T	T	T	T	T	T	T	C	ECH74115_2402	2274692	2271636	3057	162	TGC	C	TGC	C	oxidoreductase, FAD-binding	transition
CP001164	2276122	NSYN	1	G	G	G	G	G	G	G	A	G	G	G	G	ECH74115_2403	2275081	2276194	1113	1042	GTC	V	ATC	I	inner membrane protein YdiK	transition
CP001164	2277092	intergenic	1	C	T	T	T	T	T	T	T	T	C	T	T	intergenic	--	--	--	--	--	--			intergenic	transition
CP001164	2277936	NSYN	1	A	A	A	A	A	A	A	A	A	A	A	G	ECH74115_2406	2277138	2278293	1155	799	ATT	I	GTT	V	major facilitator family transporter	transition
CP001164	2278215	NSYN	1	G	G	G	G	G	G	G	G	G	G	G	A	ECH74115_2406	2277138	2278293	1155	1078	GCA	A	ACA	T	major facilitator family transporter	transition
CP001164	2279330	NSYN	1	C	C	C	C	C	C	C	C	C	C	C	T	ECH74115_2407	2278519	2279785	1266	812	GCA	A	GTA	V	transporter, major facilitator family	transition
CP001164	2279716	NSYN	1	G	A	A	A	A	A	G	G	G	G	G	G	ECH74115_2407	2278519	2279785	1266	1198	GAG	E	AAG	K	transporter, major facilitator family	transition
CP001164	2281476	intergenic	1	C	C	C	C	C	C	C	T	C	C	C	C	intergenic	--	--	--	--	--	--			intergenic	transition
CP001164	2281653	NSYN	1	G	G	G	G	G	G	G	G	A	G	G	G	ECH74115_2410	2281596	2283192	1596	58	GAA	E	AAA	K	propionate CoA-transferase	transition
CP001164	2282129	SYN	1	G	A	A	A	A	A	A	A	A	G	G	G	ECH74115_2410	2281596	2283192	1596	534	GCG	A	GCA	A	propionate CoA-transferase	transition
CP001164	2282907	NSYN	1	G	G	G	G	G	G	G	G	G	G	G	A	ECH74115_2410	2281596	2283192	1596	1312	GGA	G	AGA	R	propionate CoA-transferase	transition
CP001164	2284876	NSYN	1	T	T	T	T	T	T	T	T	T	T	T	C	ECH74115_2412	2285310	2284399	912	435	TTG	L	TTC	F	transcriptional regulator, AraC family	transition
CP001164	2287021	SYN	1	G	G	G	G	G	G	G	G	G	G	G	A	ECH74115_2415	2286410	2287349	939	612	CTG	L	CTA	L	protein FixB homolog	transition
CP001164	2292177	NSYN	1	C	C	C	T	C	C	C	C	C	C	C	C	ECH74115_2419	2293120	2290742	2379	944	GCG	A	GTG	V	phosphoenolpyruvate synthase	transition
CP001164	2292296	SYN	1	A	A	A	A	A	A	A	A	A	A	A	G	ECH74115_2419	2293120	2290742	2379	825	ATG	M	ATG	M	phosphoenolpyruvate synthase	transition
CP001164	2293060	SYN	1	C	C	C	C	C	C	C	C	T	C	C	C	ECH74115_2419	2293120	2290742	2379	61	TAC	Y	TAC	Y	phosphoenolpyruvate synthase	transition
CP001164	2294298	intergenic	1	G	A	A	A	A	A	A	A	A	G	A	A	intergenic	--	--	--	--	--	--			intergenic	transition
CP001164	2296375	NSYN	1	A	A	A	A	A	A	A	A	A	A	A	T	ECH74115_2424	2297252	2295816	1437	878	AAT	N	ATT	I	conserved hypothetical protein	transversion
CP001164	2297585	SYN	1	G	G	G	G	G	G	G	G	G	G	G	A	ECH74115_2425	2298028	2297315	714	444	GTT	V	GTA	V	conserved hypothetical protein	transition
CP001164	2299760	NSYN	1	C	C	C	C	C	C	C	C	C	C	C	T	ECH74115_2428	2300117	2299566	552	358	CGC	R	TGC	C	vitamin B12 transport periplasmic protein btuE	transition
CP001164	2300317	NSYN	1	C	C	C	C	C	C	C	C	C	C	C	A	ECH74115_2429	2301160	2300180	981	844	TGC	C	AGC	S	vitamin B12 import system permease protein btuC	transversion
CP001164	2301199	intergenic	1	C	C	C	C	C	C	C	C	T	C	C	C	intergenic	--	--	--	--	--	--			intergenic	transition
CP001164	2302464	NSYN	1	G	G	G	G	G	G	G	G	G	G	G	T	ECH74115_2431	2303952	2301565	2388	1489	GCG	A	TCG	S	phenylalanyl-tRNA synthetase, beta-subunit	transversion
CP001164	2302827	NSYN	1	C	C	C	C	C	C	C	C	C	C	C	T	ECH74115_2431	2303952	2301565	2388	1126	CGC	R	TGC	C	phenylalanyl-tRNA synthetase, beta-subunit	transition
CP001164	2309209	NSYN	1	C	C	C	C	C	C	C	C	C	C	C	G	ECH74115_2438	2309100	2310999	1899	110	CCC	P	CGC	R	conserved hypothetical protein	transversion
CP001164	2309221	NSYN	1	C	C	C	C	T	T	C	C	C	C	C	C	ECH74115_2438	2309100	2310999	1899	122	ACC	T	ATC	I	conserved hypothetical protein	transition
CP001164	2310574	NSYN	1	T	T	T	T	T	T	T	T	C	T	T	T	ECH74115_2438	2309100	2310999	1899	1475	ATA	I	ACA	T	conserved hypothetical protein	transition
CP001164	2311351	SYN	1	C	T	T	T	T	T	C	C	C	C	C	C	ECH74115_2440	2312091	2311333	759	741	CGA	R	CGT	R	conserved hypothetical protein	transition
CP001164	2314658	SYN	1	T	T	T	T	T	T	T	T	T	T	T	A	ECH74115_2443	2313804	2314665	861	855	GCT	A	GCA	A	fructosamine kinase	transversion
CP001164	2314714	SYN	1	C	C	C	T	T	T	C	C	C	C	C	C	ECH74115_2444	2315241	2314705	537	528	CCC	P	CCT	P	conserved hypothetical protein	transition
CP001164	2315377	intergenic	1	G	A	A	G	G	G	G	G	G	G	G	G	intergenic	--	--	--	--	--	--			intergenic	transition
CP001164	2316191	intergenic	1	A	A	G	A	A	A	A	A	A	A	A	A	intergenic	--	--	--	--	--	--			intergenic	transition
CP001164	2317064	SYN	1	A	G	G	G	G	G	G	G	G	A	G	G	ECH74115_2447	2316942	2318334	1392	123	GTA	V	GTG	V	transporter, dicarboxylate/amino acid:cation (Na+ or H+) symporter (DAACS) family	transition
CP001164	2317399	NSYN	1	A	T	T	T	T	T	A	A	A	A	A	A	ECH74115_2447	2316942	2318334	1392	458	AAC	N	ATC	I	transporter, dicarboxylate/amino acid:cation (Na+ or H+) symporter (DAACS) family	transversion
CP001164	2318922	intergenic	1	G	G	G	G	G	G	A	G	G	G	G	G	intergenic	--	--	--	--	--	--			intergenic	transition
CP001164	2319397	intergenic	1	C	A	A	A	A	A	A	A	A	C	A	A	intergenic	--	--	--	--	--	--			intergenic	transversion
CP001164	2322760	SYN	1	T	T	T	T	T	T	T	T	T	T	T	G	ECH74115_2451	2322940	2322182	759	181	GTT	V	GTT	V	conserved hypothetical protein	transversion
CP001164	2323095	NSYN	1	C	T	T	T	T	T	T	T	T	C	T	T	ECH74115_2452	2324305	2322953	1353	1211	ACC	T	ATC	I	6-phospho-beta-glucosidase	transition
CP001164	2323336	NSYN	1	C	C	C	C	C	C	C	C	T	C	C	C	ECH74115_2452	2324305	2322953	1353	970	CAC	H	TAC	Y	6-phospho-beta-glucosidase	transition
CP001164	2325511	NSYN	1	G	A	A	A	A	A	A	G	G	G	G	G	ECH74115_2454	2325607	2325260	348	97	CAG	Q	AAG	K	PTS system, N,N'-diacetylchitobiose-specific EIIA component	transition
CP001164	2325800	NSYN	1	A	A	A	A	A	A	A	A	A	A	A	G	ECH74115_2455	2327019	2325661	1359	1220	GAC	D	GGC	G	PTS system, N,N'-diacetylchitobiose-specific IIC component	transition
CP001164	2326845	SYN	1	A	A	A	A	A	A	A	C	A	A	A	A	ECH74115_2455	2327019	2325661	1359	175	CGA	R	CGA	R	PTS system, N,N'-diacetylchitobiose-specific IIC component	transversion
CP001164	2327883	SYN	1	G	G	G	G	G	G	G	G	G	G	G	A	ECH74115_2457	2328062	2327724	339	180	GCT	A	GCA	A	osmotically-inducible lipoprotein E	transition
CP001164	2328073	intergenic	1	A	A	A	A	A	A	A	A	A	A	A	C	intergenic	--	--	--	--	--	--			intergenic	transversion
CP001164	2330072	NSYN	1	A	T	T	T	T	T	T	T	T	A	T	T	ECH74115_2460	2329321	2330209	888	752	CAG	Q	CTG	L	excinuclease cho	transversion
CP001164	2331802	NSYN	1	G	G	G	G	G	G	G	G	G	G	G	A	ECH74115_2462	2332729	2331761	969	928	CAG	Q	AAG	K	succinylglutamate desuccinylase	transition
CP001164	2333004	SYN	1	A	C	C	C	C	C	C	A	A	A	A	A	ECH74115_2463	2334065	2332722	1344	1062	ACG	T	ACC	T	succinylarginine dihydrolase	transversion
CP001164	2333667	SYN	1	G	G	G	G	G	G	G	G	G	G	G	A	ECH74115_2463	2334065	2332722	1344	399	GTT	V	GTA	V	succinylarginine dihydrolase	transition
CP001164	2333914	NSYN	1	G	G	G	G	G	G	G	G	T	G	G	G	ECH74115_2463	2334065	2332722	1344	152	GGT	G	GTT	V	succinylarginine dihydrolase	transversion
CP001164	2335779	NSYN	1	G	G	G	G	G	G	G	G	G	G	G	A	ECH74115_2465	2336571	2335537	1035	793	GCG	A	ACG	T	arginine N-succinyltransferase	transition
CP001164	2337886	intergenic	1	G	G	G	G	G	G	G	G	G	G	G	A	intergenic	--	--	--	--	--	--			intergenic	transition
CP001164	2339161	intergenic	1	G	G	G	G	G	G	G	G	G	G	A	G	intergenic	--	--	--	--	--	--			intergenic	transition
CP001164	2339352	NSYN	1	G	G	G	G	G	G	G	G	G	G	G	A	ECH74115_2469	2339207	2339918	711	146	AGC	S	AAC	N	putative membrane protein	transition
CP001164	2344389	NSYN	1	C	C	C	C	C	C	C	C	C	C	A	C	ECH74115_2474	2343018	2344554	1536	1372	CGT	R	AGT	S	ABC transporter, permease protein	transversion
CP001164	2344877	NSYN	1	A	G	G	G	G	G	G	G	G	A	G	G	ECH74115_2475	2344553	2345207	654	325	ACC	T	GCC	A	ABC transporter, ATP-binding protein	transition
CP001164	2348482	SYN	1	C	C	C	C	C	C	C	C	C	C	C	T	ECH74115_2481	2348177	2349521	1344	306	AAC	N	AAT	N	NADP-specific glutamate dehydrogenase	transition
CP001164	2350401	SYN	1	C	C	C	C	C	C	T	C	C	C	C	C	ECH74115_2482	2350677	2349637	1041	277	TGC	C	TGC	C	conserved hypothetical protein	transition
CP001164	2351142	NSYN	1	A	A	A	A	A	A	A	A	A	A	A	G	ECH74115_2483	2352766	2350805	1962	1625	GAT	D	GGT	G	DNA topoisomerase III	transition
CP001164	2352888	NSYN	1	G	G	G	G	G	G	G	G	G	G	A	G	ECH74115_2484	2353814	2352771	1044	927	GAC	D	GAA	E	selenide, water dikinase	transition
CP001164	2353236	NSYN	1	T	C	C	C	C	C	C	C	C	T	C	C	ECH74115_2484	2353814	2352771	1044	579	TAG	*	TAC	Y	selenide, water dikinase	transition
CP001164	2353312	NSYN	1	G	G	G	G	G	G	G	A	G	G	G	G	ECH74115_2484	2353814	2352771	1044	503	TGC	C	TAC	Y	selenide, water dikinase	transition
CP001164	2355552	NSYN	1	G	G	G	G	G	G	G	G	G	G	G	A	ECH74115_2486	2354643	2356500	1857	910	GCT	A	ACT	T	protease 4	transition
CP001164	2356267	NSYN	1	C	C	C	C	C	C	C	C	C	C	C	T	ECH74115_2486	2354643	2356500	1857	1625	GCG	A	GTG	V	protease 4	transition
CP001164	2358475	intergenic	1	G	G	G	G	G	G	G	G	G	G	G	A	intergenic	--	--	--	--	--	--			intergenic	transition
CP001164	2358804	SYN	1	T	G	G	G	G	G	G	G	G	T	G	G	ECH74115_2489	2358484	2359126	642	321	GCT	A	GCG	A	pyrazinamidase/nicotinamidase	transversion
CP001164	2358850	NSYN	1	C	T	T	T	T	T	T	T	T	C	T	T	ECH74115_2489	2358484	2359126	642	367	CTT	L	TTT	F	pyrazinamidase/nicotinamidase	transition
CP001164	2359019	NSYN	1	G	G	G	G	G	G	G	G	G	G	A	G	ECH74115_2489	2358484	2359126	642	536	CGT	R	CAT	H	pyrazinamidase/nicotinamidase	transition
CP001164	2360037	NSYN	1	C	C	C	C	C	C	C	C	C	C	C	T	ECH74115_2490	2360468	2359218	1251	432	CAG	Q	CAT	H	inner membrane metabolite transport protein YdjE	transition
CP001164	2364328	NSYN	1	T	T	T	T	T	T	T	T	T	T	T	A	ECH74115_2496	2364824	2363892	933	497	ATT	I	AAT	N	kinase, pfkB family	transversion
CP001164	2364656	SYN	1	G	A	A	A	A	A	A	A	A	G	G	G	ECH74115_2496	2364824	2363892	933	169	ACG	T	ACG	T	kinase, pfkB family	transition
CP001164	2368173	SYN	1	C	C	C	C	C	C	C	C	C	C	C	T	ECH74115_2500	2369228	2368152	1077	1056	CAT	H	CAT	H	oxidoreductase, zinc-binding dehydrogenase family	transition
CP001164	2369389	intergenic	1	T	T	T	T	T	T	T	T	T	T	T	G	intergenic	--	--	--	--	--	--			intergenic	transversion
CP001164	2373329	SYN	1	G	G	G	G	G	G	G	G	G	G	G	A	ECH74115_2505	2373535	2372681	855	207	GGT	G	GGA	G	oxidoreductase, aldo/keto reductase family	transition
CP001164	2373801	NSYN	1	A	A	A	A	A	A	A	A	A	A	A	G	ECH74115_2506	2374371	2373625	747	571	CGA	R	GGA	G	MltA-interacting protein MipA	transition
CP001164	2376420	SYN	1	G	G	G	G	G	G	G	G	A	G	G	G	ECH74115_2507	2374807	2376742	1935	1614	GAG	E	GAA	E	serine kinase family protein	transition
CP001164	2378187	intergenic	1	G	G	G	G	G	G	G	G	G	G	G	A	intergenic	--	--	--	--	--	--			intergenic	transition
CP001164	2379470	NSYN	1	A	G	G	G	G	G	G	G	G	A	G	G	ECH74115_2509	2378425	2379760	1335	1046	CAC	H	CGC	R	diguanylate cyclase (GGDEF) domain protein	transition
CP001164	2383069	NSYN	1	T	T	T	T	T	T	T	T	T	T	A	T	ECH74115_2513	2383463	2382654	810	395	CTG	L	CAG	Q	transcriptional regulator, AraC family	transversion
CP001164	2383744	NSYN	1	C	C	C	C	C	C	C	C	C	C	A	C	ECH74115_2515	2383572	2384754	1182	173	CCA	P	CAA	Q	inner membrane transport protein yeaN	transversion
CP001164	2384015	SYN	1	G	G	G	G	G	G	G	G	G	G	G	T	ECH74115_2515	2383572	2384754	1182	444	GCG	A	GCT	A	inner membrane transport protein yeaN	transversion
CP001164	2385439	intergenic	1	T	T	T	T	T	T	T	T	T	T	T	A	intergenic	--	--	--	--	--	--			intergenic	transversion
CP001164	2385860	NSYN	1	G	G	G	G	G	G	G	G	A	G	G	G	ECH74115_2518	2385485	2386640	1155	376	GAA	E	AAA	K	GAF domain/diguanylate cyclase (GGDEF) domain protein	transition
CP001164	2386460	NSYN	1	G	T	T	T	T	T	T	T	T	G	G	G	ECH74115_2518	2385485	2386640	1155	976	GAA	E	TAA	*	GAF domain/diguanylate cyclase (GGDEF) domain protein	transversion
CP001164	2387920	NSYN	1	T	T	T	T	T	T	T	T	T	T	T	A	ECH74115_2523	2387817	2387952	135	104	CTT	L	CAT	H	hypothetical protein	transversion
CP001164	2389116	NSYN	1	G	G	G	G	G	G	G	G	G	G	G	A	ECH74115_2525	2389707	2388784	924	592	GCG	A	ACG	T	transcriptional regulator, LysR family	transition
CP001164	2391465	NSYN	1	G	T	T	T	T	T	T	T	T	G	T	T	ECH74115_2527	2391146	2392757	1611	320	GGT	G	GTT	V	transporter, betaine/carnitine/choline transporter (BCCT) family	transversion
CP001164	2394340	NSYN	1	A	C	C	C	C	C	C	A	A	A	A	A	ECH74115_2529	2393968	2394934	966	373	ACC	T	CCC	P	oxidoreductase, FAD/NAD-binding/iron-sulfur cluster binding protein	transversion
CP001164	2394483	NSYN	1	T	A	A	A	A	A	A	A	A	T	T	T	ECH74115_2529	2393968	2394934	966	516	CAT	H	CAA	Q	oxidoreductase, FAD/NAD-binding/iron-sulfur cluster binding protein	transversion
CP001164	2394489	SYN	1	A	G	G	G	G	G	G	G	G	A	A	A	ECH74115_2529	2393968	2394934	966	522	TCA	S	TCG	S	oxidoreductase, FAD/NAD-binding/iron-sulfur cluster binding protein	transition
CP001164	2394787	NSYN	1	G	G	G	G	G	G	G	G	G	G	G	A	ECH74115_2529	2393968	2394934	966	820	GTA	V	ATA	I	oxidoreductase, FAD/NAD-binding/iron-sulfur cluster binding protein	transition
CP001164	2394837	SYN	1	G	G	G	G	G	G	G	G	G	G	G	A	ECH74115_2529	2393968	2394934	966	870	CGG	R	CGA	R	oxidoreductase, FAD/NAD-binding/iron-sulfur cluster binding protein	transition
CP001164	2394839	NSYN	1	A	A	A	A	A	A	A	A	A	A	A	C	ECH74115_2529	2393968	2394934	966	872	GAT	D	GCT	A	oxidoreductase, FAD/NAD-binding/iron-sulfur cluster binding protein	transversion
CP001164	2396409	SYN	1	A	A	A	A	A	A	A	A	A	A	A	G	ECH74115_2532	2397869	2396184	1686	1461	ACC	T	ACG	T	long-chain-fatty-acid--CoA ligase	transition
CP001164	2396672	NSYN	1	A	A	A	A	A	A	A	A	A	A	A	G	ECH74115_2532	2397869	2396184	1686	1198	CGA	R	GGA	G	long-chain-fatty-acid--CoA ligase	transition
CP001164	2398070	intergenic	1	G	G	G	G	G	G	A	G	G	G	G	G	intergenic	--	--	--	--	--	--			intergenic	transition
CP001164	2399256	NSYN	1	G	G	G	G	G	G	G	G	G	G	A	G	ECH74115_2534	2399390	2398695	696	135	GAT	D	GAA	E	glycoprotease family protein	transition
CP001164	2400156	SYN	1	T	T	T	T	T	T	T	T	T	T	T	C	ECH74115_2535	2401358	2399448	1911	1203	TAC	Y	TAC	Y	conserved hypothetical protein	transition
CP001164	2403446	SYN	1	A	A	A	A	A	A	A	A	A	A	G	G	ECH74115_2541	2402928	2404290	1362	519	TCA	S	TCG	S	aminodeoxychorismate synthase	transition
CP001164	2403987	NSYN	1	G	T	G	G	G	G	G	G	G	G	G	G	ECH74115_2541	2402928	2404290	1362	1060	GCC	A	TCC	S	aminodeoxychorismate synthase	transversion
CP001164	2404199	SYN	1	A	A	A	A	A	A	A	A	A	A	A	C	ECH74115_2541	2402928	2404290	1362	1272	GGA	G	GGC	G	aminodeoxychorismate synthase	transversion
CP001164	2404610	SYN	1	C	C	C	C	C	C	C	C	C	C	C	T	ECH74115_2542	2404293	2404872	579	318	AGC	S	AGT	S	hydrolase, NUDIX family	transition
CP001164	2404740	NSYN	1	C	C	C	C	C	C	C	C	T	C	C	C	ECH74115_2542	2404293	2404872	579	448	CAC	H	TAC	Y	hydrolase, NUDIX family	transition
CP001164	2406102	NSYN	1	G	G	G	G	G	G	A	G	G	G	G	G	ECH74115_2543	2405055	2406420	1365	1048	GCT	A	ACT	T	L-serine ammonia-lyase 1	transition
CP001164	2408514	NSYN	1	T	T	T	T	T	T	T	C	T	T	T	T	ECH74115_2545	2409708	2408152	1557	1195	GGT	G	CGT	R	membrane protein, TerC family/CBS/transporter associated domain protein	transition
CP001164	2409112	SYN	1	A	A	A	A	A	A	G	A	A	A	A	A	ECH74115_2545	2409708	2408152	1557	597	ACT	T	ACG	T	membrane protein, TerC family/CBS/transporter associated domain protein	transition
CP001164	2411183	intergenic	1	A	A	A	A	A	A	A	A	A	A	A	T	intergenic	--	--	--	--	--	--			intergenic	transversion
CP001164	2412297	NSYN	1	G	G	G	G	G	G	G	G	G	G	G	T	ECH74115_2548	2412018	2412870	852	280	GCT	A	TCT	S	PTS system, mannose-specific IID component	transversion
CP001164	2414423	SYN	1	T	G	G	G	G	G	G	G	G	T	G	G	ECH74115_2552	2415184	2414375	810	762	TAA	*	TAG	*	ribosomal RNA large subunit methyltransferase A	transversion
CP001164	2416949	intergenic	1	T	T	T	T	T	T	T	T	T	T	T	C	intergenic	--	--	--	--	--	--			intergenic	transition
CP001164	2417430	intergenic	1	C	C	C	C	C	C	C	C	C	C	C	T	intergenic	--	--	--	--	--	--			intergenic	transition
CP001164	2418978	SYN	1	T	C	C	C	C	C	C	C	C	T	C	C	ECH74115_2560	2418400	2419774	1374	579	CCT	P	CCC	P	transporter, major facilitator family	transition
CP001164	2423948	NSYN	1	G	G	G	G	G	G	G	G	G	G	G	A	ECH74115_2565	2424252	2423755	498	305	CGC	R	CAC	H	GAF domain protein	transition
CP001164	2427905	NSYN	1	T	T	T	T	T	T	T	T	T	T	T	G	ECH74115_2567	2425628	2428268	2640	2278	TGT	C	GGT	G	mce-related protein	transversion
CP001164	2431375	intergenic	1	C	C	C	C	C	C	C	C	C	C	C	T	intergenic	--	--	--	--	--	--			intergenic	transition
CP001164	2432382	NSYN	1	G	G	G	G	G	G	G	G	G	G	T	G	ECH74115_2575	2432716	2431844	873	335	CGG	R	CTG	L	copper resistance protein D	transversion
CP001164	2433800	NSYN	1	C	C	C	C	C	C	C	C	C	C	C	T	ECH74115_2578	2433565	2434222	657	236	ACC	T	ATC	I	hydrolase, carbon-nitrogen family	transition
CP001164	2434357	NSYN	1	A	A	A	A	A	A	A	A	A	A	A	G	ECH74115_2580	2434245	2434908	663	113	CAC	H	CGC	R	exodeoxyribonuclease X	transition
CP001164	2434736	NSYN	1	G	A	A	A	A	A	A	A	A	G	A	A	ECH74115_2580	2434245	2434908	663	492	ATG	M	ATA	I	exodeoxyribonuclease X	transition
CP001164	2437377	SYN	1	C	C	C	C	C	C	C	C	C	C	C	A	ECH74115_2581	2437832	2437173	660	456	CAG	Q	CAA	Q	putative membrane protein	transversion
CP001164	2438592	NSYN	1	T	T	T	T	T	T	T	T	T	T	C	T	ECH74115_2583	2438872	2438582	291	281	GTG	V	GCG	A	YebG protein	transition
CP001164	2442537	SYN	1	G	G	G	G	G	G	A	G	G	G	G	G	ECH74115_2586	2442729	2440918	1812	193	ACG	T	ACG	T	phosphogluconate dehydratase	transition
CP001164	2449329	SYN	1	G	G	G	G	G	G	G	G	G	G	G	T	ECH74115_2592	2449760	2448438	1323	432	GGT	G	GGT	G	metalloprotease, opacity-associated protein A family	transversion
CP001164	2449868	NSYN	1	A	A	A	A	A	A	A	A	A	A	A	G	ECH74115_2593	2450708	2449776	933	841	CAA	Q	GAA	E	zinc ABC transporter, periplasmic zinc-binding protein	transition
CP001164	2450733	intergenic	1	T	C	C	C	C	C	C	T	T	T	T	T	intergenic	--	--	--	--	--	--			intergenic	transition
CP001164	2451005	SYN	1	A	G	G	G	G	G	G	G	G	A	G	G	ECH74115_2594	2450787	2451543	756	219	CCA	P	CCG	P	high-affinity zinc uptake ABC transporter, ATP-binding protein ZnuC	transition
CP001164	2454425	intergenic	1	A	A	A	A	A	A	A	A	A	A	A	T	intergenic	--	--	--	--	--	--			intergenic	transversion
CP001164	2455454	NSYN	1	A	A	A	A	A	A	A	A	A	A	A	G	ECH74115_2599	2455600	2455079	522	147	ATA	I	ATG	M	crossover junction endodeoxyribonuclease RuvC	transition
CP001164	2456742	SYN	1	C	C	C	C	C	C	C	C	C	C	C	T	ECH74115_2601	2456913	2456404	510	172	TAC	Y	TAC	Y	dATP pyrophosphohydrolase	transition
CP001164	2457783	SYN	1	G	A	A	A	A	A	A	A	A	G	G	G	ECH74115_2602	2458746	2456974	1773	964	ACG	T	ACG	T	aspartyl-tRNA synthetase	transition
CP001164	2457943	NSYN	1	T	T	T	T	T	T	T	T	T	T	T	C	ECH74115_2602	2458746	2456974	1773	804	TGG	W	TGC	C	aspartyl-tRNA synthetase	transition
CP001164	2464448	NSYN	1	A	A	A	A	A	A	A	A	A	A	A	C	ECH74115_2608	2465231	2462802	2430	784	ATA	I	CTA	L	trimethylamine N-oxide reductase III, subunit TorZ	transversion
CP001164	2466284	NSYN	1	T	T	T	T	T	T	T	T	T	T	T	G	ECH74115_2609	2466356	2465256	1101	73	CAT	H	GAT	D	trimethylamine N-oxide reductase III, c-type cytochrome subunit TorY	transversion
CP001164	2466374	intergenic	1	C	T	T	T	T	T	T	T	T	C	T	T	intergenic	--	--	--	--	--	--			intergenic	transition
CP001164	2470525	NSYN	1	A	A	A	A	A	A	A	A	A	A	A	C	ECH74115_2614	2470196	2470685	489	330	GAA	E	GAC	D	conserved hypothetical protein	transversion
CP001164	2473442	NSYN	1	A	A	A	A	A	A	A	A	A	A	A	G	ECH74115_2617	2474415	2473267	1149	974	CAC	H	CGC	R	flagellar biosynthetic protein FlhB	transition
CP001164	2475476	SYN	1	G	G	G	G	G	G	G	G	G	G	A	G	ECH74115_2620	2475661	2475272	390	186	GTT	V	GTA	V	chemotaxis response regulator CheY	transition
CP001164	2478234	NSYN	1	A	A	A	A	A	A	A	A	A	A	A	C	ECH74115_2623	2479208	2477607	1602	975	AAG	K	AAC	N	methyl-accepting chemotaxis protein IV	transversion
CP001164	2480393	NSYN	1	C	G	G	G	G	G	G	G	G	C	G	G	ECH74115_2624	2480915	2479254	1662	523	CAC	H	GAC	D	methyl-accepting chemotaxis protein II	transversion
CP001164	2480579	NSYN	1	A	A	A	A	A	A	A	A	A	A	A	G	ECH74115_2624	2480915	2479254	1662	337	TAA	*	GAA	E	methyl-accepting chemotaxis protein II	transition
CP001164	2481935	SYN	1	G	G	G	G	G	G	G	G	A	G	G	G	ECH74115_2627	2483540	2481582	1959	1606	ACG	T	ACG	T	chemotaxis protein CheA	transition
CP001164	2486190	NSYN	1	A	A	A	A	A	A	A	A	A	A	A	T	ECH74115_2631	2486419	2486069	351	230	CAG	Q	CTG	L	flagellar transcriptional activator FlhD	transversion
CP001164	2487069	intergenic	1	T	T	T	T	T	T	T	T	T	T	C	T	intergenic	--	--	--	--	--	--			intergenic	transition
CP001164	2487098	intergenic	1	G	G	G	G	G	G	G	G	G	G	A	A	intergenic	--	--	--	--	--	--			intergenic	transition
CP001164	2487638	NSYN	1	A	A	A	A	A	A	A	A	A	A	G	G	ECH74115_2633	2489058	2487634	1425	1421	CAC	H	CGC	R	alpha,alpha-trehalose-phosphate synthase (UDP-forming)	transition
CP001164	2487690	NSYN	1	G	G	G	G	G	G	G	G	G	G	G	A	ECH74115_2633	2489058	2487634	1425	1369	TCG	S	ACG	T	alpha,alpha-trehalose-phosphate synthase (UDP-forming)	transition
CP001164	2487827	NSYN	1	G	A	A	A	A	A	A	G	G	G	G	G	ECH74115_2633	2489058	2487634	1425	1232	AGC	S	AAC	N	alpha,alpha-trehalose-phosphate synthase (UDP-forming)	transition
CP001164	2489916	intergenic	1	T	T	T	T	T	T	T	T	G	T	T	T	intergenic	--	--	--	--	--	--			intergenic	transversion
CP001164	2490123	SYN	1	G	G	G	G	G	G	G	G	T	G	G	G	ECH74115_2635	2490986	2490000	987	864	GGT	G	GGT	G	L-arabinose ABC transporter, permease protein	transversion
CP001164	2490334	NSYN	1	G	G	G	G	G	G	G	G	G	G	G	A	ECH74115_2635	2490986	2490000	987	653	AGC	S	AAC	N	L-arabinose ABC transporter, permease protein	transition
CP001164	2490726	SYN	1	A	T	T	T	T	T	A	A	A	A	A	A	ECH74115_2635	2490986	2490000	987	261	ACA	T	ACT	T	L-arabinose ABC transporter, permease protein	transversion
CP001164	2490816	NSYN	1	T	T	T	T	T	T	T	T	T	T	T	A	ECH74115_2635	2490986	2490000	987	171	TGC	C	TGA	*	L-arabinose ABC transporter, permease protein	transversion
CP001164	2491957	SYN	1	G	G	G	A	G	G	G	G	G	G	G	G	ECH74115_2636	2492515	2491001	1515	559	ACG	T	ACG	T	L-arabinose ABC transporter, ATP-binding protein	transition
CP001164	2493551	NSYN	1	C	C	C	C	C	C	C	C	C	C	T	C	ECH74115_2637	2493574	2492585	990	24	CAG	Q	CAT	H	L-arabinose ABC transporter, periplasmic L-arabinose-binding protein	transition
CP001164	2493605	intergenic	1	C	C	C	C	C	C	C	C	C	C	C	T	intergenic	--	--	--	--	--	--			intergenic	transition
CP001164	2494262	intergenic	1	C	C	C	C	C	C	C	T	C	C	C	C	intergenic	--	--	--	--	--	--			intergenic	transition
CP001164	2494410	NSYN	1	T	A	A	A	A	A	A	A	A	T	A	A	ECH74115_2638	2494371	2494875	504	40	TTG	L	ATG	M	ferritin family protein	transversion
CP001164	2494997	NSYN	1	G	G	T	G	G	G	G	G	G	G	G	G	ECH74115_2639	2495205	2494954	252	209	CGC	R	CTC	L	conserved hypothetical protein	transversion
CP001164	2495276	intergenic	1	A	A	A	A	A	A	C	A	A	A	A	A	intergenic	--	--	--	--	--	--			intergenic	transversion
CP001164	2522612	NSYN	1	A	A	A	A	A	A	A	A	A	A	A	G	ECH74115_2684	2522698	2522150	549	87	AGT	S	AGG	R	CDP-diacylglycerol--glycerol-3-phosphate 3-phosphatidyltransferase	transition
CP001164	2525864	NSYN	1	C	A	A	A	A	A	A	A	A	C	A	A	ECH74115_2689	2525699	2525924	225	166	CCC	P	ACC	T	conserved hypothetical protein	transversion
CP001164	2526401	SYN	1	G	G	G	G	G	G	G	G	G	G	G	A	ECH74115_2690	2526713	2525991	723	313	CGG	R	AGG	R	regulatory protein SdiA	transition
CP001164	2526870	intergenic	1	T	T	T	T	T	T	T	T	T	T	T	G	intergenic	--	--	--	--	--	--			intergenic	transversion
CP001164	2527914	NSYN	1	G	G	G	G	G	G	G	G	G	G	G	C	ECH74115_2692	2528360	2527692	669	447	GAG	E	GAC	D	L-cystine ABC transporter, permease protein	transversion
CP001164	2529375	intergenic	1	G	G	G	G	G	G	G	G	G	G	A	G	intergenic	--	--	--	--	--	--			intergenic	transition
CP001164	2531828	NSYN	1	G	A	A	A	A	A	A	G	G	G	G	G	ECH74115_2697	2531744	2531864	120	85	GAC	D	AAC	N	hypothetical protein	transition
CP001164	2534825	SYN	1	G	G	G	G	G	G	G	G	A	G	G	G	ECH74115_2699	2534013	2535411	1398	813	GCG	A	GCA	A	flagellar hook-associated protein 2	transition
CP001164	2540472	NSYN	1	G	A	G	G	G	G	G	G	G	G	G	G	ECH74115_2706	2539953	2540622	669	520	GAA	E	AAA	K	conserved hypothetical protein	transition
CP001164	2540845	SYN	1	C	C	C	C	C	C	C	C	C	C	C	T	ECH74115_2707	2540732	2541212	480	114	GAC	D	GAT	D	acetyltransferase, GNAT family	transition
CP001164	2544568	intergenic	1	A	A	A	A	A	A	A	A	A	A	A	T	intergenic	--	--	--	--	--	--			intergenic	transversion
CP001164	2545993	NSYN	1	T	T	T	T	T	T	T	T	T	T	T	G	ECH74115_2714	2545324	2546983	1659	670	TGG	W	GGG	G	flagellar M-ring protein FliF	transversion
CP001164	2550079	NSYN	1	T	C	T	T	T	T	T	T	T	T	T	T	ECH74115_2717	2548711	2550085	1374	1369	TCA	S	CCA	P	flagellar protein export ATPase FliI	transition
CP001164	2551424	SYN	1	C	C	C	C	C	C	C	C	C	C	A	C	ECH74115_2719	2550543	2551671	1128	882	CGC	R	CGA	R	flagellar hook-length control protein Flik	transversion
CP001164	2552573	SYN	1	G	G	G	G	G	G	G	G	G	G	G	A	ECH74115_2721	2552244	2553249	1005	330	CTG	L	CTA	L	flagellar motor switch protein FliM	transition
CP001164	2555837	intergenic	1	T	T	T	T	T	T	T	T	T	T	T	C	intergenic	--	--	--	--	--	--			intergenic	transition
CP001164	2556406	SYN	1	T	T	T	T	T	T	T	T	C	T	T	T	ECH74115_2728	2556125	2556749	624	282	TAT	Y	TAC	Y	colanic acid capsular biosynthesis activation protein A	transition
CP001164	2559806	SYN	1	G	G	G	G	G	G	G	G	G	G	G	A	ECH74115_2732	2560174	2558480	1695	369	GGT	G	GGA	G	diguanylate cyclase (GGDEF) domain protein	transition
CP001164	2560945	NSYN	1	T	G	G	G	G	G	G	T	T	T	T	T	ECH74115_2735	2561523	2560606	918	579	TAC	Y	TAG	*	putative membrane protein	transversion
CP001164	2562663	NSYN	1	A	A	A	A	A	A	A	A	A	A	A	C	ECH74115_2736	2563075	2562605	471	413	GAT	D	GCT	A	very short patch repair protein	transversion
CP001164	2564002	NSYN	1	G	G	G	G	G	G	G	G	G	G	G	A	ECH74115_2738	2564474	2563056	1419	473	CGC	R	CAC	H	DNA-cytosine methyltransferase	transition
CP001164	2565790	intergenic	1	G	G	A	G	G	G	G	G	G	G	G	G	intergenic	--	--	--	--	--	--			intergenic	transition
CP001164	2565995	intergenic	1	T	T	T	T	T	T	C	T	T	T	T	T	intergenic	--	--	--	--	--	--			intergenic	transition
CP001164	2566011	intergenic	1	A	A	A	A	A	A	A	A	A	A	G	A	intergenic	--	--	--	--	--	--			intergenic	transition
CP001164	2566035	intergenic	1	T	T	T	T	T	T	T	T	T	T	C	T	intergenic	--	--	--	--	--	--			intergenic	transition
CP001164	2566062	intergenic	1	C	C	C	C	C	C	C	C	C	C	C	T	intergenic	--	--	--	--	--	--			intergenic	transition
CP001164	2566089	intergenic	1	T	T	T	T	T	T	T	T	T	T	T	C	intergenic	--	--	--	--	--	--			intergenic	transition
CP001164	2566930	intergenic	1	A	A	A	A	A	A	A	A	A	A	A	C	intergenic	--	--	--	--	--	--			intergenic	transversion
CP001164	2569137	NSYN	1	G	G	G	G	G	G	A	G	G	G	G	G	ECH74115_2747	2570302	2568944	1359	1166	AGG	R	AAG	K	heavy metal sensor histidine kinase	transition
CP001164	2572744	NSYN	1	A	A	A	A	A	A	A	A	C	A	A	A	ECH74115_2751	2572632	2573268	636	113	GAT	D	GCT	A	putative membrane protein	transversion
CP001164	2573356	intergenic	1	A	A	A	A	A	A	A	A	A	A	A	T	intergenic	--	--	--	--	--	--			intergenic	transversion
CP001164	2574965	NSYN	1	T	T	T	T	T	T	T	T	T	T	T	C	ECH74115_2753	2574517	2575048	531	449	GTA	V	GCA	A	nickel-dependent hydrogenase, b-type cytochrome subunit	transition
CP001164	2576818	NSYN	1	T	T	T	T	T	T	T	T	T	T	T	C	ECH74115_2754	2576184	2576838	654	635	ATA	I	ACA	T	non-LEE-encoded effector EspJ	transition
CP001164	2605340	intergenic	1	T	T	T	T	T	T	T	T	T	T	C	T	intergenic	--	--	--	--	--	--			intergenic	transition
CP001164	2610154	intergenic	1	A	G	G	G	G	G	G	G	G	A	G	G	intergenic	--	--	--	--	--	--			intergenic	transition
CP001164	2613732	intergenic	1	C	C	C	C	C	C	C	C	C	C	T	T	intergenic	--	--	--	--	--	--			intergenic	transition
CP001164	2613742	intergenic	1	T	T	T	T	T	T	T	T	T	T	C	T	intergenic	--	--	--	--	--	--			intergenic	transition
CP001164	2613835	NSYN	1	T	T	T	T	T	T	T	T	T	T	T	A	ECH74115_2810	2613805	2614465	660	31	TTC	F	ATC	I	putative repressor protein	transversion
CP001164	2614528	intergenic	1	C	C	C	C	C	C	C	C	C	C	C	T	intergenic	--	--	--	--	--	--			intergenic	transition
CP001164	2619365	NSYN	1	G	G	G	G	G	G	G	G	G	G	G	T	ECH74115_2817	2618574	2619654	1080	792	TGG	W	TGT	C	site-specific recombinase, phage integrase family	transversion
CP001164	2619775	intergenic	1	A	A	A	A	A	A	A	A	A	A	T	A	intergenic	--	--	--	--	--	--			intergenic	transversion
CP001164	2621373	NSYN	1	T	G	G	G	G	G	G	G	G	T	G	G	ECH74115_2821	2621252	2629115	7863	122	ATC	I	AGC	S	conserved hypothetical protein	transversion
CP001164	2629520	SYN	1	G	G	G	G	G	G	G	G	G	G	G	A	ECH74115_2822	2630428	2629376	1053	909	GGG	G	GGA	G	conserved hypothetical protein	transition
CP001164	2632510	SYN	1	A	A	A	A	A	A	A	A	A	A	A	G	ECH74115_2824	2632160	2633615	1455	351	TCA	S	TCG	S	AMP nucleosidase	transition
CP001164	2635649	NSYN	1	G	A	A	A	A	A	A	G	G	G	G	G	ECH74115_2829	2636753	2635299	1455	1105	CTG	L	ATG	M	MATE efflux family protein	transition
CP001164	2635721	NSYN	1	T	T	T	T	T	T	T	T	T	T	T	A	ECH74115_2829	2636753	2635299	1455	1033	GGT	G	AGT	S	MATE efflux family protein	transversion
CP001164	2636654	NSYN	1	A	A	A	A	A	A	A	A	A	A	A	G	ECH74115_2829	2636753	2635299	1455	100	AAA	K	GAA	E	MATE efflux family protein	transition
CP001164	2638526	NSYN	1	C	C	C	C	C	C	C	C	T	C	C	C	ECH74115_2832	2639029	2638112	918	504	CAG	Q	CAT	H	nitrogen assimilation regulatory protein Nac	transition
CP001164	2642481	intergenic	1	G	G	G	G	G	G	G	G	A	G	G	G	intergenic	--	--	--	--	--	--			intergenic	transition
CP001164	2645866	SYN	1	T	T	T	T	T	T	T	T	T	T	T	C	ECH74115_2842	2645937	2645773	165	72	TAC	Y	TAC	Y	conserved hypothetical protein	transition
CP001164	2646112	intergenic	1	T	C	C	C	C	C	C	C	C	T	C	C	intergenic	--	--	--	--	--	--			intergenic	transition
CP001164	2648216	intergenic	1	T	T	T	T	T	T	T	T	T	T	C	T	intergenic	--	--	--	--	--	--			intergenic	transition
CP001164	2721000	SYN	1	A	A	A	A	A	A	A	A	A	A	A	G	ECH74115_2944	2720101	2721526	1425	900	GTA	V	GTG	V	exodeoxyribonuclease I	transition
CP001164	2726359	SYN	1	C	C	C	C	C	C	C	C	C	C	T	C	ECH74115_2950	2726470	2725646	825	112	TTC	F	TTC	F	NAD dependent epimerase/dehydratase family protein	transition
CP001164	2731454	NSYN	1	A	G	G	G	G	G	G	A	A	A	A	A	ECH74115_2956	2731435	2732026	591	20	GAT	D	GGT	G	imidazole glycerol phosphate synthase, glutamine amidotransferase subunit	transition
CP001164	2734641	SYN	0.5	C	C	C	C	C	C	C	T	C	C	C	C	ECH74115_2960	2735199	2734222	978	559	TAC	Y	TAC	Y	chain length determinant protein	transition
CP001164	2734833	NSYN	1	A	G	G	G	G	G	G	G	G	A	G	G	ECH74115_2960	2735199	2734222	978	367	AGA	R	GGA	G	chain length determinant protein	transition
CP001164	2737641	NSYN	1	C	C	C	C	C	C	C	C	C	C	C	T	ECH74115_2962	2738166	2736760	1407	526	ATC	I	TTC	F	6-phosphogluconate dehydrogenase, decarboxylating	transition
CP001164	2741489	SYN	1	C	T	T	T	T	T	T	T	T	T	T	T	ECH74115_2964	2741665	2740295	1371	177	CGC	R	CGT	R	phosphomannomutase	transition
CP001164	2741526	NSYN	1	A	G	G	G	G	G	G	G	G	G	G	G	ECH74115_2964	2741665	2740295	1371	140	GAC	D	GGC	G	phosphomannomutase	transition
CP001164	2743142	NSYN	1	A	A	A	A	A	A	A	A	A	A	G	A	ECH74115_2966	2743608	2743099	510	467	AAT	N	AGT	S	gdp-mannose mannosyl hydrolase	transition
CP001164	2745963	SYN	1	G	G	G	G	G	G	G	G	G	G	G	A	ECH74115_2969	2746931	2745717	1215	969	GTC	V	GTA	V	WbdP	transition
CP001164	2752239	intergenic	1	A	A	A	A	A	A	A	A	C	A	A	A	intergenic	--	--	--	--	--	--			intergenic	transversion
CP001164	2752386	intergenic	1	A	A	A	A	A	A	A	A	A	A	A	T	intergenic	--	--	--	--	--	--			intergenic	transversion
CP001164	2752992	NSYN	1	T	T	T	T	T	T	T	T	T	T	T	C	ECH74115_2975	2753321	2752428	894	330	TAA	*	TAC	Y	regulatory protein GalF	transition
CP001164	2753588	SYN	1	G	G	G	G	G	G	G	G	G	G	A	G	ECH74115_2976	2754559	2753564	996	972	GTC	V	GTA	V	UDP-N-acetylglucosamine 4-epimerase	transition
CP001164	2755267	NSYN	1	T	T	T	T	T	T	T	T	T	T	T	G	ECH74115_2977	2756111	2754717	1395	845	CTG	L	CGG	R	colanic acid biosynthesis protein WcaM	transversion
CP001164	2756027	NSYN	1	A	G	G	G	G	G	G	G	G	A	G	G	ECH74115_2977	2756111	2754717	1395	85	AAA	K	GAA	E	colanic acid biosynthesis protein WcaM	transition
CP001164	2757039	NSYN	1	A	A	A	A	A	A	A	A	A	A	A	G	ECH74115_2978	2757342	2756122	1221	304	CCA	P	GCA	A	colanic acid biosynthesis glycosyl transferase WcaL	transition
CP001164	2757126	SYN	1	T	G	G	G	G	G	G	G	G	T	G	G	ECH74115_2978	2757342	2756122	1221	217	GCT	A	GCT	A	colanic acid biosynthesis glycosyl transferase WcaL	transversion
CP001164	2757562	NSYN	1	T	T	T	T	T	T	T	T	T	T	C	T	ECH74115_2979	2758619	2757339	1281	1058	GTT	V	GCT	A	colanic acid biosynthesis protein WcaK	transition
CP001164	2760411	SYN	1	G	G	G	G	G	G	G	G	C	G	G	G	ECH74115_2981	2761673	2760279	1395	1263	GGT	G	GGC	G	capsular polysaccharide biosynthesis protein	transversion
CP001164	2761026	SYN	1	G	A	G	G	G	G	G	G	G	G	G	G	ECH74115_2981	2761673	2760279	1395	648	GTC	V	GTA	V	capsular polysaccharide biosynthesis protein	transition
CP001164	2764778	SYN	1	A	G	G	G	G	G	G	G	G	A	G	G	ECH74115_2985	2765953	2764730	1224	1176	AAG	K	AAG	K	colanic acid biosynthesis glycosyl transferase WcaI	transition
CP001164	2764951	NSYN	1	C	C	C	C	C	C	C	C	A	C	C	C	ECH74115_2985	2765953	2764730	1224	1003	CGC	R	AGC	S	colanic acid biosynthesis glycosyl transferase WcaI	transversion
CP001164	2765839	NSYN	1	T	T	T	T	T	T	T	T	T	T	A	T	ECH74115_2985	2765953	2764730	1224	115	GGT	G	AGT	S	colanic acid biosynthesis glycosyl transferase WcaI	transversion
CP001164	2767421	SYN	1	C	C	C	C	C	C	C	C	C	C	C	T	ECH74115_2988	2768521	2767400	1122	1101	CAC	H	CAT	H	GDP-mannose 4,6-dehydratase	transition
CP001164	2767581	NSYN	1	G	G	G	G	G	G	G	G	G	G	G	A	ECH74115_2988	2768521	2767400	1122	941	CGG	R	CAG	Q	GDP-mannose 4,6-dehydratase	transition
CP001164	2768866	NSYN	1	A	A	A	A	A	A	A	A	A	A	A	G	ECH74115_2989	2769098	2768550	549	233	CAC	H	CGC	R	putative colanic acid biosynthesis acetyltransferase wcaF	transition
CP001164	2769181	NSYN	1	A	G	G	G	G	G	G	G	G	A	G	G	ECH74115_2990	2769860	2769114	747	680	AAC	N	AGC	S	colanic acid biosynthesis glycosyl transferase WcaE	transition
CP001164	2770081	SYN	1	A	A	A	A	A	A	A	A	A	A	A	G	ECH74115_2991	2771088	2769871	1218	1008	AGA	R	AGG	R	colanic acid polymerase WcaD	transition
CP001164	2770336	NSYN	1	T	T	T	T	T	T	T	T	T	T	A	A	ECH74115_2991	2771088	2769871	1218	753	TGC	C	TGA	*	colanic acid polymerase WcaD	transversion
CP001164	2771947	NSYN	1	C	T	T	T	T	T	T	T	T	C	T	T	ECH74115_2992	2772280	2771063	1218	334	GCC	A	TCC	S	colanic acid biosynthesis glycosyl transferase WcaC	transition
CP001164	2773385	SYN	1	T	C	C	C	C	C	C	C	C	T	C	C	ECH74115_2994	2773607	2772768	840	223	CGT	R	CGT	R	colanic acid biosynthesis glycosyl transferase WcaA	transition
CP001164	2775420	NSYN	1	T	T	T	T	T	T	T	T	T	T	T	G	ECH74115_2995	2775862	2773700	2163	443	CTC	L	CGC	R	tyrosine-protein kinase wzc	transversion
CP001164	2776515	SYN	1	T	T	T	T	T	T	T	T	T	T	T	C	ECH74115_2997	2777453	2776314	1140	939	TTT	F	TTC	F	polysaccharide biosynthesis/export protein	transition
CP001164	2777229	SYN	1	C	C	A	C	C	C	C	C	C	C	C	C	ECH74115_2997	2777453	2776314	1140	225	CGT	R	CGA	R	polysaccharide biosynthesis/export protein	transversion
CP001164	2777641	intergenic	1	C	G	G	G	G	G	G	G	G	C	G	G	intergenic	--	--	--	--	--	--			intergenic	transversion
CP001164	2777675	intergenic	1	A	A	A	A	A	A	A	G	A	A	A	A	intergenic	--	--	--	--	--	--			intergenic	transition
CP001164	2779396	NSYN	1	G	G	G	G	G	G	G	G	G	G	T	G	ECH74115_2998	2778112	2779696	1584	1285	GTG	V	TTG	L	membrane protein, TerC family/CBS/transporter associated domain protein	transversion
CP001164	2780703	NSYN	1	G	T	T	T	T	T	T	T	T	G	T	T	ECH74115_3001	2782294	2780441	1854	1592	AGC	S	ATC	I	AsmA protein	transversion
CP001164	2781916	NSYN	1	C	C	C	C	C	C	C	C	C	C	T	C	ECH74115_3001	2782294	2780441	1854	379	AAC	N	TAC	Y	AsmA protein	transition
CP001164	2784226	intergenic	1	C	C	C	C	C	C	C	C	C	C	C	G	intergenic	--	--	--	--	--	--			intergenic	transversion
CP001164	2785032	intergenic	1	C	C	C	C	C	C	T	C	C	C	C	C	intergenic	--	--	--	--	--	--			intergenic	transition
CP001164	2786832	intergenic	1	G	G	G	G	G	G	G	G	G	G	G	A	intergenic	--	--	--	--	--	--			intergenic	transition
CP001164	2789241	NSYN	1	G	G	G	G	G	G	G	G	G	G	G	A	ECH74115_3007	2788349	2789702	1353	893	AGT	S	AAT	N	conserved hypothetical protein	transition
CP001164	2790142	NSYN	1	G	G	G	G	G	G	G	G	G	G	A	G	ECH74115_3008	2791654	2789714	1941	1513	CCG	P	ACG	T	conserved hypothetical protein	transition
CP001164	2790306	NSYN	1	G	G	G	G	G	G	G	G	G	G	A	G	ECH74115_3008	2791654	2789714	1941	1349	CGC	R	CAC	H	conserved hypothetical protein	transition
CP001164	2790936	NSYN	1	T	T	T	T	T	T	T	T	T	T	T	G	ECH74115_3008	2791654	2789714	1941	719	ATG	M	AGG	R	conserved hypothetical protein	transversion
CP001164	2791141	SYN	1	G	G	G	G	G	G	A	G	G	G	G	G	ECH74115_3008	2791654	2789714	1941	514	ATG	M	ATG	M	conserved hypothetical protein	transition
CP001164	2791919	NSYN	1	A	A	A	A	A	A	A	A	A	A	A	G	ECH74115_3009	2792412	2791651	762	494	GAC	D	GGC	G	conserved hypothetical protein	transition
CP001164	2792107	NSYN	1	A	A	A	A	A	A	A	A	A	A	A	G	ECH74115_3009	2792412	2791651	762	306	AGC	S	AGG	R	conserved hypothetical protein	transition
CP001164	2794328	SYN	1	A	A	A	A	A	A	A	A	A	A	G	G	ECH74115_3014	2794284	2795532	1248	45	GTA	V	GTG	V	RND transporter, hydrophobe/amphiphile efflux-1 (HAE1) family, MFP subunit	transition
CP001164	2795339	SYN	1	G	G	G	G	G	G	G	A	G	G	G	G	ECH74115_3014	2794284	2795532	1248	1056	GTG	V	GTA	V	RND transporter, hydrophobe/amphiphile efflux-1 (HAE1) family, MFP subunit	transition
CP001164	2796584	NSYN	1	A	G	G	G	G	G	G	G	G	A	G	G	ECH74115_3015	2795531	2798654	3123	1054	ACG	T	GCG	A	multidrug resistance protein MdtB	transition
CP001164	2799105	NSYN	1	A	A	A	A	A	A	A	A	A	A	A	T	ECH74115_3016	2798654	2801732	3078	452	CAG	Q	CTG	L	multidrug resistance protein MdtC	transversion
CP001164	2800058	NSYN	1	G	G	G	G	G	G	G	G	A	G	G	G	ECH74115_3016	2798654	2801732	3078	1405	GTC	V	ATC	I	multidrug resistance protein MdtC	transition
CP001164	2801708	NSYN	1	T	T	T	T	T	T	T	T	T	T	T	C	ECH74115_3016	2798654	2801732	3078	3055	TCT	S	CCT	P	multidrug resistance protein MdtC	transition
CP001164	2802320	NSYN	1	C	C	C	C	C	C	T	C	C	C	C	C	ECH74115_3017	2801732	2803148	1416	589	CTT	L	TTT	F	transporter, major facilitator family	transition
CP001164	2802415	SYN	1	T	T	T	T	T	T	T	G	T	T	T	T	ECH74115_3017	2801732	2803148	1416	684	ACT	T	ACG	T	transporter, major facilitator family	transversion
CP001164	2802786	NSYN	1	G	G	G	G	G	G	G	G	G	G	C	G	ECH74115_3017	2801732	2803148	1416	1055	TGG	W	TCG	S	transporter, major facilitator family	transversion
CP001164	2804918	SYN	1	G	G	G	G	G	G	G	G	G	G	A	G	ECH74115_3019	2804544	2805267	723	375	TTG	L	TTA	L	transcriptional regulatory protein baeR	transition
CP001164	2805545	NSYN	1	G	G	G	G	G	G	G	T	G	G	G	G	ECH74115_3020	2805457	2805790	333	89	AGC	S	ATC	I	conserved hypothetical protein	transversion
CP001164	2840006	intergenic	1	A	A	A	A	A	A	A	A	A	A	A	C	intergenic	--	--	--	--	--	--			intergenic	transversion
CP001164	2840283	intergenic	1	T	T	T	T	T	T	T	T	T	T	T	C	intergenic	--	--	--	--	--	--			intergenic	transition
CP001164	2844332	NSYN	1	T	T	T	T	T	T	T	T	T	T	C	T	ECH74115_3071	2844614	2843259	1356	283	AAT	N	CAT	H	PTS system, galactitol-specific IIC component	transition
CP001164	2844766	NSYN	1	G	G	G	G	G	G	G	G	G	G	G	A	ECH74115_3072	2844902	2844618	285	137	GGT	G	GAT	D	PTS system, galactitol-specific IIB component	transition
CP001164	2845722	NSYN	1	C	C	C	C	C	C	C	C	C	C	C	T	ECH74115_3074	2846657	2845395	1263	936	CAG	Q	CAT	H	putative tagatose-6-phosphate kinase	transition
CP001164	2846678	intergenic	1	C	C	C	C	C	C	C	C	C	C	T	C	intergenic	--	--	--	--	--	--			intergenic	transition
CP001164	2847551	intergenic	1	T	T	T	T	T	T	T	C	T	T	T	T	intergenic	--	--	--	--	--	--			intergenic	transition
CP001164	2847556	intergenic	1	A	A	A	A	A	A	A	A	A	A	A	C	intergenic	--	--	--	--	--	--			intergenic	transversion
CP001164	2847588	intergenic	1	T	T	T	T	T	T	T	T	T	T	C	T	intergenic	--	--	--	--	--	--			intergenic	transition
CP001164	2847624	intergenic	1	G	G	G	G	G	G	G	G	G	G	G	A	intergenic	--	--	--	--	--	--			intergenic	transition
CP001164	2848700	SYN	1	G	G	G	G	G	G	A	G	G	G	G	G	ECH74115_3076	2848891	2847839	1053	192	GCC	A	GCA	A	fructose-bisphosphate aldolase, class 1	transition
CP001164	2849097	intergenic	1	G	G	G	G	G	G	G	G	G	G	G	A	intergenic	--	--	--	--	--	--			intergenic	transition
CP001164	2849604	NSYN	1	G	G	G	G	G	G	G	G	T	G	G	G	ECH74115_3077	2849148	2850426	1278	457	GGG	G	TGG	W	nucleoside transporter	transversion
CP001164	2849866	NSYN	1	G	G	G	G	G	G	G	G	G	G	G	A	ECH74115_3077	2849148	2850426	1278	719	GGC	G	GAC	D	nucleoside transporter	transition
CP001164	2853765	NSYN	1	C	C	C	C	C	C	C	C	C	C	C	T	ECH74115_3081	2853978	2853160	819	214	AAC	N	TAC	Y	glycosyl hydrolase family 25	transition
CP001164	2853800	NSYN	1	T	T	T	T	T	T	T	T	T	T	T	C	ECH74115_3081	2853978	2853160	819	179	ATG	M	ACG	T	glycosyl hydrolase family 25	transition
CP001164	2853989	intergenic	1	C	C	C	C	C	C	C	C	C	C	C	T	intergenic	--	--	--	--	--	--			intergenic	transition
CP001164	2854107	NSYN	1	T	T	T	T	T	T	T	T	T	T	T	A	ECH74115_3082	2854843	2854043	801	737	CTG	L	CAG	Q	phosphomethylpyrimidine kinase	transversion
CP001164	2857228	intergenic	1	T	C	C	C	C	C	C	C	C	T	C	C	intergenic	--	--	--	--	--	--			intergenic	transition
CP001164	2859645	NSYN	1	A	A	A	A	A	A	A	A	A	A	A	T	ECH74115_3090	2859500	2859839	339	146	TAC	Y	TTC	F	conserved hypothetical protein	transversion
CP001164	2861670	SYN	1	T	T	T	T	T	T	T	T	T	T	T	C	ECH74115_3092	2863445	2860965	2481	1776	TCC	S	TCC	S	fimbrial usher protein	transition
CP001164	2862113	NSYN	1	A	A	A	A	A	A	A	A	A	A	A	G	ECH74115_3092	2863445	2860965	2481	1333	CGA	R	GGA	G	fimbrial usher protein	transition
CP001164	2863537	NSYN	1	T	T	T	T	T	T	T	T	T	T	A	A	ECH74115_3093	2864135	2863461	675	599	TTC	F	TAC	Y	gram-negative pilus assembly chaperone	transversion
CP001164	2864430	SYN	1	A	A	A	A	A	A	A	A	A	A	A	G	ECH74115_3094	2864765	2864223	543	336	ACT	T	ACG	T	fimbrial protein	transition
CP001164	2864920	intergenic	1	G	G	G	G	G	G	G	A	G	G	G	G	intergenic	--	--	--	--	--	--			intergenic	transition
CP001164	2864998	intergenic	1	A	A	A	A	A	A	A	A	G	A	A	A	intergenic	--	--	--	--	--	--			intergenic	transition
CP001164	2867362	SYN	1	G	G	G	G	G	G	G	G	G	G	G	A	ECH74115_3097	2866841	2868875	2034	522	CCG	P	CCA	P	methionyl tRNA synthetase	transition
CP001164	2869901	intergenic	1	A	A	A	A	A	A	A	A	A	A	A	C	intergenic	--	--	--	--	--	--			intergenic	transversion
CP001164	2871458	NSYN	1	T	T	T	T	T	T	T	T	T	T	T	G	ECH74115_3099	2869933	2872825	2892	1526	CTG	L	CGG	R	hypothetical protein	transversion
CP001164	2874373	intergenic	1	G	G	G	G	G	G	G	G	G	G	G	A	intergenic	--	--	--	--	--	--			intergenic	transition
CP001164	2875134	intergenic	1	G	G	G	G	G	G	G	G	G	G	G	A	intergenic	--	--	--	--	--	--			intergenic	transition
CP001164	2875376	intergenic	1	A	A	A	A	A	A	A	A	A	A	A	G	intergenic	--	--	--	--	--	--			intergenic	transition
CP001164	2876011	SYN	1	C	C	C	C	C	C	C	C	C	C	C	A	ECH74115_3102	2875832	2879462	3630	180	ATC	I	ATA	I	molybdate metabolism regulator MolR homolog	transversion
CP001164	2879275	SYN	1	C	C	C	C	C	C	C	C	C	C	T	C	ECH74115_3102	2875832	2879462	3630	3444	GAC	D	GAT	D	molybdate metabolism regulator MolR homolog	transition
CP001164	2883825	intergenic	1	T	C	C	C	C	C	C	C	C	T	C	C	intergenic	--	--	--	--	--	--			intergenic	transition
CP001164	2883900	intergenic	1	G	G	G	G	G	G	G	G	G	G	G	A	intergenic	--	--	--	--	--	--			intergenic	transition
CP001164	2884221	intergenic	1	C	C	C	C	C	C	C	C	C	C	C	T	intergenic	--	--	--	--	--	--			intergenic	transition
CP001164	2884656	NSYN	1	C	A	A	A	A	A	A	A	A	C	A	A	ECH74115_3108	2884452	2885589	1137	205	CCC	P	ACC	T	von Willebrand factor type A domain protein	transversion
CP001164	2885893	SYN	1	A	G	G	G	G	G	G	G	G	A	G	G	ECH74115_3109	2885585	2887589	2004	309	GAA	E	GAG	E	conserved hypothetical protein	transition
CP001164	2888028	NSYN	1	G	G	G	G	G	G	G	G	G	G	G	A	ECH74115_3110	2887713	2888175	462	316	GTG	V	ATG	M	putative lipoprotein	transition
CP001164	2891150	intergenic	1	A	A	A	A	A	A	A	A	A	A	A	T	intergenic	--	--	--	--	--	--			intergenic	transversion
CP001164	2986067	SYN	1	C	C	T	C	C	C	C	C	C	C	C	C	ECH74115_3253	2986711	2985980	732	645	CTG	L	CTT	L	ABC transporter, quaternary amine uptake (QAT) family, permease protein	transition
CP001164	2986567	NSYN	1	A	A	A	A	A	A	A	A	A	A	A	G	ECH74115_3253	2986711	2985980	732	145	CAA	Q	GAA	E	ABC transporter, quaternary amine uptake (QAT) family, permease protein	transition
CP001164	2987316	SYN	1	C	C	C	C	C	C	C	T	C	C	C	C	ECH74115_3254	2987642	2986716	927	327	CCT	P	CCT	P	ABC transporter, quaternary amine uptake (QAT) family, ATP-binding protein	transition
CP001164	2987460	NSYN	1	A	A	A	A	A	A	A	A	A	A	A	G	ECH74115_3254	2987642	2986716	927	183	AGC	S	AGG	R	ABC transporter, quaternary amine uptake (QAT) family, ATP-binding protein	transition
CP001164	2988247	SYN	1	C	G	G	G	G	G	C	C	C	C	C	C	ECH74115_3255	2988792	2987635	1158	546	CGT	R	CGG	R	ABC transporter, quaternary amine uptake (QAT) family, permease protein	transversion
CP001164	2988453	NSYN	1	A	A	A	A	A	A	A	A	A	A	A	G	ECH74115_3255	2988792	2987635	1158	340	CAA	Q	GAA	E	ABC transporter, quaternary amine uptake (QAT) family, permease protein	transition
CP001164	2989034	NSYN	1	T	T	T	T	T	T	T	T	T	T	T	A	ECH74115_3256	2989716	2988799	918	683	CTG	L	CAG	Q	ABC transporter, quaternary amine uptake transporter (QAT) family, substrate-binding protein	transversion
CP001164	2989657	SYN	1	C	C	C	C	C	C	C	C	C	C	C	T	ECH74115_3256	2989716	2988799	918	60	CGG	R	CGT	R	ABC transporter, quaternary amine uptake transporter (QAT) family, substrate-binding protein	transition
CP001164	2993597	SYN	1	G	G	G	G	G	G	G	G	G	G	T	G	ECH74115_3259	2992461	2994177	1716	1137	CCG	P	CCT	P	D-lactate dehydrogenase	transversion
CP001164	2993961	NSYN	1	G	G	G	G	G	G	G	G	G	G	G	A	ECH74115_3259	2992461	2994177	1716	1501	GTT	V	ATT	I	D-lactate dehydrogenase	transition
CP001164	2994331	SYN	1	G	G	G	G	G	G	G	G	G	G	G	A	ECH74115_3260	2995155	2994214	942	825	GCG	A	GCA	A	penicillin-binding protein 7	transition
CP001164	2995609	NSYN	1	C	C	C	C	C	C	C	C	C	C	C	A	ECH74115_3261	2995931	2995320	612	323	ACG	T	AAG	K	putative membrane protein	transversion
CP001164	2995675	NSYN	1	T	A	A	A	A	A	A	A	A	T	A	A	ECH74115_3261	2995931	2995320	612	257	ATC	I	AAC	N	putative membrane protein	transversion
CP001164	2995742	NSYN	1	C	A	C	C	C	C	C	C	C	C	C	C	ECH74115_3261	2995931	2995320	612	190	GCC	A	ACC	T	putative membrane protein	transversion
CP001164	2995987	intergenic	1	A	A	A	A	A	A	A	A	A	A	A	G	intergenic	--	--	--	--	--	--			intergenic	transition
CP001164	2996887	NSYN	1	C	C	C	C	C	C	C	C	C	C	C	T	ECH74115_3264	2997546	2996785	762	660	CAG	Q	CAT	H	putative 3-oxoacyl-[acyl-carrier-protein] reductase	transition
CP001164	2999894	NSYN	1	C	C	C	T	C	C	C	C	C	C	C	C	ECH74115_3266	3000680	2999730	951	787	GCC	A	TCC	S	tRNA-dihydrouridine synthase C	transition
CP001164	3001391	SYN	1	T	C	C	C	C	C	C	C	C	T	C	C	ECH74115_3267	3002032	3000839	1194	642	TAC	Y	TAC	Y	FAD dependent oxidoreductase	transition
CP001164	3002465	NSYN	1	T	T	T	T	T	T	T	T	T	T	T	C	ECH74115_3268	3002691	3002047	645	227	GTG	V	GCG	A	maleylacetoacetate isomerase	transition
CP001164	3002843	NSYN	1	A	A	A	A	A	A	A	A	A	A	A	T	ECH74115_3269	3003401	3002700	702	559	GCA	A	TCA	S	fumarylacetoacetate hydrolase family protein	transversion
CP001164	3004938	NSYN	1	T	A	A	A	A	A	A	A	A	T	A	A	ECH74115_3271	3005814	3004456	1359	877	CCT	P	ACT	T	transporter, major facilitator family	transversion
CP001164	3005637	NSYN	1	C	C	C	A	C	C	C	C	C	C	C	C	ECH74115_3271	3005814	3004456	1359	178	GGC	G	AGC	S	transporter, major facilitator family	transversion
CP001164	3005927	intergenic	1	T	T	T	T	T	T	T	T	T	T	T	G	intergenic	--	--	--	--	--	--			intergenic	transversion
CP001164	3006375	SYN	1	C	C	C	C	C	C	C	C	C	C	C	A	ECH74115_3272	3005941	3006850	909	435	GCC	A	GCA	A	transcriptional regulator, LysR family	transversion
CP001164	3006928	intergenic	1	T	A	A	A	A	A	A	A	A	T	A	A	intergenic	--	--	--	--	--	--			intergenic	transversion
CP001164	3012892	intergenic	1	T	C	C	C	C	C	C	C	C	T	C	C	intergenic	--	--	--	--	--	--			intergenic	transition
CP001164	3013114	SYN	1	G	G	G	G	G	G	G	G	G	G	A	G	ECH74115_3281	3014109	3013099	1011	996	GTA	V	GTA	V	galactose ABC transporter, permease protein	transition
CP001164	3014496	NSYN	1	G	T	T	T	T	T	T	T	T	G	T	T	ECH74115_3282	3015645	3014125	1521	1150	GCG	A	TCG	S	galactose ABC transporter, ATP-binding protein	transversion
CP001164	3015352	SYN	1	G	G	G	G	G	G	G	G	A	G	G	G	ECH74115_3282	3015645	3014125	1521	294	GTT	V	GTA	V	galactose ABC transporter, ATP-binding protein	transition
CP001164	3015648	intergenic	1	A	G	A	A	A	A	A	A	A	A	A	A	intergenic	--	--	--	--	--	--			intergenic	transition
CP001164	3019284	NSYN	1	G	A	A	A	A	A	A	A	A	G	G	G	ECH74115_3286	3019322	3018165	1158	39	GAC	D	GAA	E	putative membrane protein	transition
CP001164	3021374	NSYN	1	A	A	A	A	A	A	A	A	C	A	A	A	ECH74115_3290	3023112	3021133	1980	1739	CAG	Q	CCG	P	colicin I receptor	transversion
CP001164	3021701	NSYN	1	A	A	A	A	A	A	C	A	A	A	A	A	ECH74115_3290	3023112	3021133	1980	1412	AAC	N	ACC	T	colicin I receptor	transversion
CP001164	3022200	NSYN	1	C	C	C	C	C	C	C	C	C	C	C	T	ECH74115_3290	3023112	3021133	1980	913	GCC	A	TCC	S	colicin I receptor	transition
CP001164	3023275	NSYN	1	G	G	G	G	G	G	A	G	G	G	G	G	ECH74115_3291	3023253	3023388	135	23	GGC	G	GAC	D	hypothetical protein	transition
CP001164	3026421	SYN	1	C	C	C	C	C	C	C	C	C	C	C	T	ECH74115_3294	3026058	3027108	1050	364	CTG	L	TTG	L	putative membrane protein	transition
CP001164	3029705	NSYN	1	A	A	A	A	A	A	A	A	A	A	A	T	ECH74115_3297	3030435	3029185	1251	731	AAT	N	ATT	I	nucleoside transporter, NupC family	transversion
CP001164	3030908	NSYN	1	T	T	T	T	T	T	T	T	T	T	G	T	ECH74115_3298	3031476	3030535	942	569	ATC	I	AGC	S	Inosine-uridine preferring nucleoside hydrolase family protein	transversion
CP001164	3035397	NSYN	1	C	C	C	C	C	C	C	C	C	C	C	T	ECH74115_3302	3035586	3034645	942	190	GCC	A	TCC	S	kinase, pfkB family protein	transition
CP001164	3035474	NSYN	1	G	G	G	G	G	G	G	C	G	G	G	G	ECH74115_3302	3035586	3034645	942	113	CGT	R	CCT	P	kinase, pfkB family protein	transversion
CP001164	3039830	intergenic	1	G	G	G	G	G	G	G	G	G	G	G	A	intergenic	--	--	--	--	--	--			intergenic	transition
CP001164	3046284	NSYN	1	A	A	A	A	A	A	G	A	A	A	A	A	ECH74115_3313	3046271	3046838	567	14	CAA	Q	CGA	R	NlpC/P60 family protein	transition
CP001164	3047077	intergenic	1	C	C	C	C	C	C	T	C	C	C	C	C	intergenic	--	--	--	--	--	--			intergenic	transition
CP001164	3048736	SYN	1	T	C	C	C	C	C	C	C	C	T	C	C	ECH74115_3315	3048656	3050471	1815	81	GCT	A	GCC	A	ABC transporter, periplasmic solute-binding protein	transition
CP001164	3049006	SYN	1	C	C	C	C	C	C	T	C	C	C	C	C	ECH74115_3315	3048656	3050471	1815	351	GTC	V	GTT	V	ABC transporter, periplasmic solute-binding protein	transition
CP001164	3049018	SYN	1	T	T	T	T	T	T	T	T	T	T	T	G	ECH74115_3315	3048656	3050471	1815	363	CCT	P	CCG	P	ABC transporter, periplasmic solute-binding protein	transversion
CP001164	3050124	NSYN	1	C	C	C	C	C	C	C	C	C	C	A	C	ECH74115_3315	3048656	3050471	1815	1469	CCG	P	CAG	Q	ABC transporter, periplasmic solute-binding protein	transversion
CP001164	3050275	SYN	1	G	A	A	A	A	A	G	G	G	G	G	G	ECH74115_3315	3048656	3050471	1815	1620	GGG	G	GGA	G	ABC transporter, periplasmic solute-binding protein	transition
CP001164	3051325	SYN	1	G	G	G	G	G	G	G	A	G	G	G	G	ECH74115_3316	3050471	3051566	1095	855	CTG	L	CTA	L	ABC transporter, permease protein	transition
CP001164	3051803	NSYN	1	A	A	A	A	A	A	C	A	A	A	A	A	ECH74115_3317	3051565	3052591	1026	239	GAC	D	GCC	A	ABC transporter, permease protein	transversion
CP001164	3054334	NSYN	1	C	C	C	C	C	C	C	C	C	C	C	T	ECH74115_3319	3054529	3054185	345	196	GCC	A	TCC	S	conserved hypothetical protein	transition
CP001164	3055264	NSYN	1	G	G	G	G	G	G	G	G	C	G	G	G	ECH74115_3320	3056052	3054862	1191	789	GAA	E	GAC	D	bicyclomycin resistance protein	transversion
CP001164	3058958	NSYN	1	T	T	T	T	T	T	T	T	T	T	T	G	ECH74115_3323	3058809	3059094	285	150	ATT	I	ATG	M	ribosomal L25p family protein	transversion
CP001164	3059778	SYN	1	T	T	T	T	T	T	T	T	T	T	A	T	ECH74115_3324	3060239	3059232	1008	462	TAA	*	TAA	*	nucleoid-associated protein NdpA	transversion
CP001164	3059883	NSYN	1	T	T	T	T	T	T	A	T	T	T	T	T	ECH74115_3324	3060239	3059232	1008	357	TGC	C	TGA	*	nucleoid-associated protein NdpA	transversion
CP001164	3061609	SYN	1	G	G	G	G	G	G	G	G	G	G	G	A	ECH74115_3327	3060668	3062429	1761	942	TCG	S	TCA	S	sulfatase family protein	transition
CP001164	3062056	SYN	1	C	C	C	C	C	C	C	C	C	C	T	C	ECH74115_3327	3060668	3062429	1761	1389	GAC	D	GAT	D	sulfatase family protein	transition
CP001164	3063448	SYN	1	G	G	G	G	G	G	A	G	G	G	G	G	ECH74115_3329	3065271	3062680	2592	1824	GTT	V	GTA	V	putative autotransporter, IS5K-containing	transition
CP001164	3064177	SYN	1	G	G	G	G	G	G	G	G	G	G	G	A	ECH74115_3329	3065271	3062680	2592	1095	GCC	A	GCA	A	putative autotransporter, IS5K-containing	transition
CP001164	3070011	SYN	1	G	G	G	G	G	G	G	G	A	G	G	G	ECH74115_3334	3070295	3069816	480	285	GTA	V	GTA	V	cytochrome c-type biogenesis protein CcmE	transition
CP001164	3070563	NSYN	1	T	T	T	T	T	T	T	T	T	T	G	T	ECH74115_3336	3071235	3070498	738	673	AAT	N	GAT	D	heme exporter protein C	transversion
CP001164	3072921	NSYN	1	G	G	G	G	G	G	G	G	G	G	A	G	ECH74115_3339	3073174	3072572	603	254	CGC	R	CAC	H	cytochrome c-type protein napC	transition
CP001164	3073838	NSYN	1	G	G	G	G	G	G	G	G	A	G	G	G	ECH74115_3341	3074493	3073630	864	656	CGC	R	CAC	H	ferredoxin-type protein NapH	transition
CP001164	3074224	NSYN	1	C	C	C	C	C	C	A	C	C	C	C	C	ECH74115_3341	3074493	3073630	864	270	CAC	H	CAA	Q	ferredoxin-type protein NapH	transversion
CP001164	3074332	NSYN	1	A	A	A	A	A	A	A	A	A	A	A	G	ECH74115_3341	3074493	3073630	864	162	ATA	I	ATG	M	ferredoxin-type protein NapH	transition
CP001164	3074784	NSYN	1	A	A	A	A	A	A	A	A	A	A	A	G	ECH74115_3342	3075175	3074480	696	392	CAC	H	CGC	R	ferredoxin-type protein NapG	transition
CP001164	3075709	NSYN	1	G	G	G	G	G	G	G	A	G	G	G	G	ECH74115_3343	3077668	3075182	2487	1960	GCG	A	ACG	T	periplasmic nitrate reductase, large subunit	transition
CP001164	3076718	SYN	1	A	A	A	A	A	A	A	A	A	A	A	C	ECH74115_3343	3077668	3075182	2487	951	ACC	T	ACC	T	periplasmic nitrate reductase, large subunit	transversion
CP001164	3076922	SYN	1	G	G	G	G	G	G	G	G	G	G	G	A	ECH74115_3343	3077668	3075182	2487	747	GCT	A	GCA	A	periplasmic nitrate reductase, large subunit	transition
CP001164	3077896	NSYN	1	A	A	A	A	A	A	A	A	A	A	A	G	ECH74115_3344	3077928	3077665	264	33	AAC	N	AAG	K	NapD protein	transition
CP001164	3079614	NSYN	1	T	T	T	T	T	T	T	T	C	T	T	T	ECH74115_3348	3081103	3079457	1647	1490	CTT	L	CCT	P	malate dehydrogenase	transition
CP001164	3081485	SYN	1	G	A	A	A	A	A	A	A	A	G	G	G	ECH74115_3349	3082964	3081321	1644	1480	CGG	R	AGG	R	ABC transporter ATP-binding protein	transition
CP001164	3084320	SYN	1	C	C	C	C	C	C	C	C	C	C	C	A	ECH74115_3351	3084754	3083690	1065	435	CGC	R	CGA	R	regulatory protein Ada	transversion
CP001164	3085301	NSYN	1	G	G	G	A	G	G	G	G	G	G	G	G	ECH74115_3352	3085883	3084828	1056	583	CAG	Q	AAG	K	thiamine biosynthesis lipoprotein ApbE	transition
CP001164	3087284	intergenic	1	G	G	G	G	G	G	G	G	G	G	G	A	intergenic	--	--	--	--	--	--			intergenic	transition
CP001164	3090891	SYN	1	G	G	G	G	G	G	G	G	T	G	G	G	ECH74115_3357	3090526	3091177	651	366	GCG	A	GCT	A	capsular synthesis regulator component B	transversion
CP001164	3093449	SYN	1	C	C	C	C	C	C	C	C	C	C	T	T	ECH74115_3358	3094225	3091376	2850	777	CCC	P	CCT	P	sensor histidine kinase/response regulator RcsC	transition
CP001164	3094085	NSYN	1	T	T	A	T	T	T	T	T	T	T	T	T	ECH74115_3358	3094225	3091376	2850	141	TTC	F	TTA	L	sensor histidine kinase/response regulator RcsC	transversion
CP001164	3094736	NSYN	1	A	A	A	A	A	A	A	A	A	A	A	G	ECH74115_3359	3095276	3094500	777	541	CAA	Q	GAA	E	conserved hypothetical protein	transition
CP001164	3094979	NSYN	1	T	C	C	C	C	C	C	C	C	T	C	C	ECH74115_3359	3095276	3094500	777	298	ACT	T	CCT	P	conserved hypothetical protein	transition
CP001164	3097527	NSYN	1	C	C	C	C	C	C	C	C	A	C	C	C	ECH74115_3362	3101367	3096931	4437	3841	TCC	S	ACC	T	alpha-2-macroglobulin family protein	transversion
CP001164	3098248	SYN	1	G	G	G	G	G	G	G	G	G	G	A	G	ECH74115_3362	3101367	3096931	4437	3120	GTT	V	GTA	V	alpha-2-macroglobulin family protein	transition
CP001164	3100438	SYN	1	G	G	G	G	G	G	G	G	C	G	G	G	ECH74115_3362	3101367	3096931	4437	930	GCC	A	GCC	A	alpha-2-macroglobulin family protein	transversion
CP001164	3105761	NSYN	1	A	G	G	G	G	G	G	A	A	A	A	A	ECH74115_3365	3106552	3103925	2628	792	AAT	N	AAG	K	DNA gyrase, A subunit	transition
CP001164	3110419	NSYN	1	G	G	G	G	G	G	G	G	G	G	A	G	ECH74115_3367	3111266	3107562	3705	848	GGT	G	GAT	D	putative outer membrane autotransporter adhesin	transition
CP001164	3111004	NSYN	1	A	G	G	G	G	G	G	G	G	A	G	G	ECH74115_3367	3111266	3107562	3705	263	GAT	D	GGT	G	putative outer membrane autotransporter adhesin	transition
CP001164	3111203	NSYN	1	T	C	C	C	C	C	C	C	C	T	C	C	ECH74115_3367	3111266	3107562	3705	64	ATT	I	CTT	L	putative outer membrane autotransporter adhesin	transition
CP001164	3111248	SYN	1	G	A	A	A	A	A	A	A	A	G	A	A	ECH74115_3367	3111266	3107562	3705	19	AGG	R	AGG	R	putative outer membrane autotransporter adhesin	transition
CP001164	3111764	intergenic	1	A	A	A	A	A	A	A	A	A	A	A	T	intergenic	--	--	--	--	--	--			intergenic	transversion
CP001164	3112420	SYN	1	C	T	C	C	C	C	C	C	C	C	C	C	ECH74115_3368	3112010	3114296	2286	411	CAC	H	CAT	H	ribonucleoside-diphosphate reductase, alpha subunit	transition
CP001164	3112593	NSYN	1	A	G	G	G	G	G	G	G	G	A	G	G	ECH74115_3368	3112010	3114296	2286	584	CAT	H	CGT	R	ribonucleoside-diphosphate reductase, alpha subunit	transition
CP001164	3118506	SYN	1	G	C	C	C	C	C	C	C	C	G	C	C	ECH74115_3373	3118033	3118912	879	474	CCG	P	CCC	P	conserved domain protein	transversion
CP001164	3118900	NSYN	1	G	G	G	G	G	G	G	G	G	G	G	A	ECH74115_3373	3118033	3118912	879	868	GGA	G	AGA	R	conserved domain protein	transition
CP001164	3119438	NSYN	1	A	A	A	A	A	A	A	A	A	A	A	G	ECH74115_3375	3119375	3120446	1071	64	ACA	T	GCA	A	conserved hypothetical protein	transition
CP001164	3120890	NSYN	1	C	C	C	C	C	C	C	C	C	C	A	C	ECH74115_3376	3121745	3120669	1077	856	CTC	L	ATC	I	glycerophosphoryl diester phosphodiesterase	transversion
CP001164	3123328	intergenic	1	C	C	C	C	C	C	C	C	C	C	C	T	intergenic	--	--	--	--	--	--			intergenic	transition
CP001164	3125246	NSYN	1	G	G	G	G	G	G	G	G	G	G	G	C	ECH74115_3379	3124999	3126259	1260	248	CGC	R	CCC	P	anaerobic glycerol-3-phosphate dehydrogenase, subunit B	transversion
CP001164	3125714	NSYN	1	T	T	T	T	T	T	T	T	T	T	T	A	ECH74115_3379	3124999	3126259	1260	716	CTA	L	CAA	Q	anaerobic glycerol-3-phosphate dehydrogenase, subunit B	transversion
CP001164	3127212	NSYN	1	C	C	C	C	C	C	T	C	C	C	C	C	ECH74115_3380	3126255	3127446	1191	958	CTT	L	TTT	F	sn-glycerol-3-phosphate dehydrogenase (anaerobic), K-small subunit	transition
CP001164	3127781	NSYN	1	A	A	A	A	A	A	A	A	A	A	A	C	ECH74115_3382	3127638	3128565	927	144	GAA	E	GAC	D	conserved hypothetical protein	transversion
CP001164	3129419	intergenic	1	A	A	A	A	A	A	A	G	A	A	A	A	intergenic	--	--	--	--	--	--			intergenic	transition
CP001164	3129601	SYN	1	G	G	G	G	G	G	G	G	G	G	G	A	ECH74115_3384	3130183	3129425	759	583	AAG	K	AAG	K	major facilitator superfamily MFS_1	transition
CP001164	3134726	SYN	1	G	G	G	G	G	G	G	G	G	G	T	G	ECH74115_3390	3135508	3134306	1203	783	GCG	A	GCT	A	CinA family protein	transversion
CP001164	3134879	SYN	1	G	G	G	G	G	G	G	G	T	G	G	G	ECH74115_3390	3135508	3134306	1203	630	GCC	A	GCT	A	CinA family protein	transversion
CP001164	3137305	NSYN	1	T	C	C	C	C	C	C	C	C	T	C	C	ECH74115_3393	3137495	3136893	603	191	ATG	M	ACG	T	phosphoglycerate mutase family protein	transition
CP001164	3138408	SYN	1	G	G	G	G	G	G	G	G	G	G	G	A	ECH74115_3394	3137785	3138943	1158	624	CAG	Q	CAA	Q	UDP-4-amino-4-deoxy-L-arabinose--oxoglutarate aminotransferase	transition
CP001164	3139155	SYN	1	A	A	A	A	A	A	A	A	A	A	A	G	ECH74115_3395	3138946	3139915	969	210	GTA	V	GTG	V	undecaprenyl-phosphate 4-deoxy-4-formamido-L-arabinose transferase	transition
CP001164	3139656	SYN	1	C	T	T	T	T	T	T	T	T	C	T	T	ECH74115_3395	3138946	3139915	969	711	AGC	S	AGT	S	undecaprenyl-phosphate 4-deoxy-4-formamido-L-arabinose transferase	transition
CP001164	3145897	NSYN	1	C	A	A	C	C	C	C	C	C	C	C	C	ECH74115_3402	3146878	3145523	1356	982	GTC	V	ATC	I	o-succinylbenzoate-CoA ligase	transversion
CP001164	3146724	NSYN	1	T	T	T	T	T	T	T	T	T	T	T	C	ECH74115_3402	3146878	3145523	1356	155	GTC	V	GCC	A	o-succinylbenzoate-CoA ligase	transition
CP001164	3150534	NSYN	1	G	G	G	G	T	T	G	G	G	G	G	G	ECH74115_3406	3151134	3149464	1671	601	ACG	T	TCG	S	2-succinyl-6-hydroxy-2, 4-cyclohexadiene-1-carboxylic acid synthase/2-oxoglutarate decarboxylase	transversion
CP001164	3152468	SYN	1	T	T	T	T	T	T	T	T	T	T	A	T	ECH74115_3407	3152518	3151223	1296	51	TTG	L	TTA	L	isochorismate synthase, menaquinone-specific	transversion
CP001164	3152645	NSYN	1	C	C	C	C	C	C	C	C	C	C	C	A	ECH74115_3408	3152902	3152597	306	258	CAC	H	CAA	Q	conserved hypothetical protein	transversion
CP001164	3153996	NSYN	1	A	A	A	A	A	A	A	A	A	A	A	G	ECH74115_3410	3153465	3154401	936	532	AGC	S	GGC	G	ribonuclease Z	transition
CP001164	3158543	NSYN	1	A	A	A	A	A	A	A	G	A	A	A	A	ECH74115_3415	3158970	3157513	1458	428	GAC	D	GGC	G	NADH-quinone oxidoreductase, N subunit	transition
CP001164	3164032	SYN	1	C	C	C	C	C	C	C	T	C	C	C	C	ECH74115_3421	3164974	3163997	978	943	TAC	Y	TAC	Y	NADH-quinone oxidoreductase, H subunit	transition
CP001164	3164687	NSYN	1	C	C	C	T	C	C	C	C	C	C	C	C	ECH74115_3421	3164974	3163997	978	288	CAG	Q	CAT	H	NADH-quinone oxidoreductase, H subunit	transition
CP001164	3169046	SYN	1	G	G	G	G	G	G	G	G	G	G	A	G	ECH74115_3423	3169087	3167750	1338	42	GGT	G	GGA	G	NADH-quinone oxidoreductase, F subunit	transition
CP001164	3174692	intergenic	1	T	T	T	T	T	T	T	T	C	T	T	T	intergenic	--	--	--	--	--	--			intergenic	transition
CP001164	3174910	intergenic	1	G	G	G	G	G	G	G	T	G	G	G	G	intergenic	--	--	--	--	--	--			intergenic	transversion
CP001164	3174925	intergenic	1	G	G	G	G	G	G	A	G	G	G	G	A	intergenic	--	--	--	--	--	--			intergenic	transition
CP001164	3174942	intergenic	1	C	C	C	C	C	C	C	C	C	C	C	T	intergenic	--	--	--	--	--	--			intergenic	transition
CP001164	3175794	SYN	1	C	C	C	C	C	C	C	C	C	C	T	C	ECH74115_3429	3175093	3176311	1218	702	ACC	T	ACT	T	aminotransferase, classes I and II	transition
CP001164	3176077	NSYN	1	T	T	T	T	T	T	T	T	T	T	T	C	ECH74115_3429	3175093	3176311	1218	985	TGT	C	CGT	R	aminotransferase, classes I and II	transition
CP001164	3178635	NSYN	1	C	C	C	C	C	C	C	C	C	C	C	T	ECH74115_3431	3178884	3177052	1833	250	GAC	D	TAC	Y	TRAP transporter, DctM-like membrane protein	transition
CP001164	3179160	SYN	1	C	C	C	C	C	C	C	C	C	C	T	C	ECH74115_3432	3179621	3178971	651	462	CGC	R	CGT	R	sugar-phosphatase, YfbT	transition
CP001164	3179411	NSYN	1	A	A	A	A	A	A	A	A	A	A	A	G	ECH74115_3432	3179621	3178971	651	211	CAA	Q	GAA	E	sugar-phosphatase, YfbT	transition
CP001164	3182537	SYN	1	C	C	C	C	C	C	C	C	T	C	C	C	ECH74115_3437	3182279	3184424	2145	259	CTG	L	TTG	L	phosphate acetyltransferase	transition
CP001164	3186078	NSYN	1	T	T	T	T	T	T	T	T	T	T	T	C	ECH74115_3438	3184592	3186134	1542	1487	CTG	L	CCG	P	C4-dicarboxylate anaerobic carrier protein	transition
CP001164	3187439	SYN	1	T	T	T	T	T	T	T	T	T	T	T	C	ECH74115_3441	3188017	3187373	645	579	TGC	C	TGC	C	glutathione S-transferase domain protein	transition
CP001164	3190746	NSYN	1	A	A	A	A	A	A	A	A	A	A	A	G	ECH74115_3445	3191071	3190181	891	326	CAC	H	CGC	R	conserved hypothetical protein	transition
CP001164	3195808	NSYN	1	T	T	T	T	T	T	T	T	T	T	T	C	ECH74115_3451	3196158	3195589	570	351	TGG	W	TGC	C	3-octaprenyl-4-hydroxybenzoate carboxy-lyase	transition
CP001164	3199439	SYN	1	C	C	C	C	C	C	T	C	C	C	C	C	ECH74115_3454	3199489	3198827	663	51	CGC	R	CGT	R	sporulation and cell division repeat protein	transition
CP001164	3200457	SYN	1	A	A	A	A	A	A	A	A	A	A	A	C	ECH74115_3455	3200747	3199479	1269	291	ACC	T	ACC	T	tetrahydrofolate synthase/dihydrofolate synthase	transversion
CP001164	3200486	NSYN	1	A	A	A	A	A	A	A	A	A	A	A	G	ECH74115_3455	3200747	3199479	1269	262	ACA	T	GCA	A	tetrahydrofolate synthase/dihydrofolate synthase	transition
CP001164	3202202	NSYN	1	A	A	A	A	A	A	A	A	A	A	A	G	ECH74115_3457	3202546	3201887	660	345	ATC	I	ATG	M	membrane protein, DedA family	transition
CP001164	3202265	SYN	1	G	G	G	G	G	G	G	G	G	G	G	C	ECH74115_3457	3202546	3201887	660	282	GCG	A	GCC	A	membrane protein, DedA family	transversion
CP001164	3204421	NSYN	1	T	T	T	T	T	T	T	T	T	T	T	C	ECH74115_3459	3204454	3203441	1014	34	TGT	C	CGT	R	aspartate-semialdehyde dehydrogenase family protein	transition
CP001164	3205981	NSYN	1	G	G	G	G	G	G	G	G	G	G	G	T	ECH74115_3463	3205755	3206751	996	227	TGC	C	TTC	F	div protein	transversion
CP001164	3206223	NSYN	1	A	C	C	C	C	C	C	C	C	A	C	C	ECH74115_3463	3205755	3206751	996	469	AGC	S	CGC	R	div protein	transversion
CP001164	3206954	SYN	1	A	G	G	G	G	G	G	G	G	A	G	G	ECH74115_3462	3207925	3206747	1179	972	ACC	T	ACG	T	transporter, major facilitator family	transition
CP001164	3209396	NSYN	1	G	G	G	G	G	G	G	G	G	G	G	A	ECH74115_3464	3209420	3208200	1221	25	CAG	Q	AAG	K	3-oxoacyl-[acyl-carrier-protein] synthase 1	transition
CP001164	3209715	NSYN	1	A	A	A	A	A	A	A	A	A	A	A	G	ECH74115_3465	3209579	3211586	2007	137	AAC	N	AGC	S	tRNA U-34 5-methylaminomethyl-2-thiouridine biosynthesis protein MnmC	transition
CP001164	3213812	NSYN	1	G	G	G	G	G	G	G	G	G	G	G	A	ECH74115_3469	3214199	3213375	825	388	CCG	P	ACG	T	penicillin-insensitive murein endopeptidase	transition
CP001164	3219726	SYN	1	A	A	A	A	A	A	A	A	A	A	A	G	ECH74115_3478	3219712	3219868	156	15	CCA	P	CCG	P	hypothetical protein	transition
CP001164	3220153	SYN	1	A	A	A	A	A	A	A	A	A	A	A	G	ECH74115_3479	3220647	3219889	759	495	ACT	T	ACG	T	chaperone protein PapD	transition
CP001164	3221073	NSYN	1	G	C	C	C	C	C	G	G	G	G	G	G	ECH74115_3480	3223252	3220670	2583	2180	GGC	G	GCC	A	fimbrial usher protein	transversion
CP001164	3222968	SYN	1	G	G	G	G	G	G	G	G	G	G	T	G	ECH74115_3480	3223252	3220670	2583	285	GTT	V	GTT	V	fimbrial usher protein	transversion
CP001164	3225306	SYN	1	A	A	A	A	A	A	A	A	A	A	T	A	ECH74115_3484	3227432	3225288	2145	2127	AGT	S	AGT	S	fatty oxidation complex, alpha subunit FadJ	transversion
CP001164	3226753	NSYN	1	A	T	T	T	T	T	T	A	A	A	A	A	ECH74115_3484	3227432	3225288	2145	680	CAG	Q	CTG	L	fatty oxidation complex, alpha subunit FadJ	transversion
CP001164	3227645	SYN	1	C	C	C	C	C	C	C	C	C	C	C	T	ECH74115_3485	3228742	3227432	1311	1098	CGC	R	CGT	R	acetyl-CoA C-acyltransferase FadI	transition
CP001164	3232155	intergenic	1	G	G	G	G	G	G	G	T	G	G	G	G	intergenic	--	--	--	--	--	--			intergenic	transversion
CP001164	3232324	intergenic	1	A	C	C	C	C	C	A	A	A	A	A	A	intergenic	--	--	--	--	--	--			intergenic	transversion
CP001164	3232325	intergenic	1	G	T	T	T	T	T	G	G	G	G	G	G	intergenic	--	--	--	--	--	--			intergenic	transversion
CP001164	3232326	intergenic	1	A	C	C	C	C	C	A	A	A	A	A	A	intergenic	--	--	--	--	--	--			intergenic	transversion
CP001164	3297167	intergenic	1	C	C	G	C	C	C	C	C	C	C	C	C	intergenic	--	--	--	--	--	--			intergenic	transversion
CP001164	3303315	NSYN	1	C	C	C	C	C	C	C	C	C	C	C	T	ECH74115_3588	3304201	3302789	1413	887	CCA	P	CTA	L	conserved hypothetical protein	transition
CP001164	3303916	SYN	1	A	A	A	A	A	A	A	A	A	A	A	G	ECH74115_3588	3304201	3302789	1413	286	GGA	G	GGA	G	conserved hypothetical protein	transition
CP001164	3307262	intergenic	1	T	C	C	C	C	C	C	C	C	T	C	C	intergenic	--	--	--	--	--	--			intergenic	transition
CP001164	3309088	SYN	1	T	T	T	T	T	T	T	T	T	T	G	G	ECH74115_3594	3308531	3309974	1443	558	ACT	T	ACG	T	sucrose-6-phosphate hydrolase	transversion
CP001164	3309331	SYN	1	C	C	C	C	C	C	C	C	C	C	T	C	ECH74115_3594	3308531	3309974	1443	801	TCC	S	TCT	S	sucrose-6-phosphate hydrolase	transition
CP001164	3311830	NSYN	1	G	G	G	G	G	G	G	G	G	G	A	G	ECH74115_3597	3311455	3312784	1329	376	GTC	V	ATC	I	D-serine ammonia-lyase	transition
CP001164	3314119	NSYN	1	A	A	A	A	A	A	A	A	A	A	A	G	ECH74115_3598	3314429	3312891	1539	311	GAT	D	GGT	G	multidrug resistance protein Y	transition
CP001164	3315531	NSYN	1	G	A	A	A	A	A	A	G	G	G	G	G	ECH74115_3599	3315592	3314429	1164	62	CGC	R	CAC	H	drug resistance MFS transporter, membrane fusion protein (MFP) subunit EmrK	transition
CP001164	3319479	NSYN	1	A	A	A	A	A	A	C	A	A	A	A	A	ECH74115_3601	3316837	3320221	3384	2643	CAA	Q	CAC	H	sensor histidine kinase/response regulator EvgS	transversion
CP001164	3320317	intergenic	1	C	C	C	C	C	C	A	C	C	C	C	C	intergenic	--	--	--	--	--	--			intergenic	transversion
CP001164	3322339	NSYN	1	C	C	C	C	C	C	C	T	C	C	C	C	ECH74115_3604	3322435	3321491	945	97	GGC	G	TGC	C	transporter, auxin efflux carrier family protein	transition
CP001164	3322897	NSYN	1	C	C	C	C	C	C	A	C	C	C	C	C	ECH74115_3605	3324199	3322505	1695	1303	CAC	H	AAC	N	oxalyl-CoA decarboxylase	transversion
CP001164	3322943	SYN	1	G	G	G	G	G	G	A	G	G	G	G	G	ECH74115_3605	3324199	3322505	1695	1257	GGT	G	GGA	G	oxalyl-CoA decarboxylase	transition
CP001164	3326423	NSYN	1	T	C	C	C	C	C	C	C	C	T	C	C	ECH74115_3607	3326651	3326016	636	229	TTT	F	CTT	L	conserved hypothetical protein	transition
CP001164	3327177	intergenic	1	C	C	C	C	C	C	C	C	C	C	C	T	intergenic	--	--	--	--	--	--			intergenic	transition
CP001164	3331414	NSYN	1	T	T	T	T	T	T	T	T	T	T	G	T	ECH74115_3612	3330939	3332619	1680	476	TTG	L	TGG	W	sensor histidine kinase	transversion
CP001164	3332102	SYN	1	G	G	G	G	G	G	G	G	G	G	A	G	ECH74115_3612	3330939	3332619	1680	1164	CTG	L	CTA	L	sensor histidine kinase	transition
CP001164	3338701	NSYN	1	G	G	G	G	G	G	G	A	G	G	G	G	ECH74115_3617	3338882	3337797	1086	182	GGC	G	GAC	D	aminopeptidase YpdF	transition
CP001164	3343118	SYN	1	A	A	A	A	A	A	A	A	A	A	A	C	ECH74115_3621	3341880	3343137	1257	1239	CCA	P	CCC	P	chloride transporter, chloride channel (ClC) family	transversion
CP001164	3345338	SYN	1	C	C	C	C	C	C	C	C	C	C	C	T	ECH74115_3624	3345291	3346494	1203	48	ATC	I	ATT	I	nucleoside transporter NupC	transition
CP001164	3353405	SYN	1	T	T	T	T	T	T	T	T	T	T	A	T	ECH74115_3633	3353322	3353454	132	84	ATT	I	ATA	I	hypothetical protein	transversion
CP001164	3353531	intergenic	1	G	G	G	G	G	G	G	G	G	G	G	A	intergenic	--	--	--	--	--	--			intergenic	transition
CP001164	3354799	NSYN	1	C	T	T	T	T	T	T	C	C	C	C	C	ECH74115_3638	3355352	3354426	927	554	CCA	P	CTA	L	transcriptional regulator, LysR family	transition
CP001164	3359482	NSYN	1	G	G	G	G	G	G	A	G	G	G	G	G	ECH74115_3643	3359741	3358743	999	260	CGA	R	CAA	Q	cell division protein ZipA	transition
CP001164	3360984	NSYN	1	T	T	T	T	T	T	T	T	T	T	C	T	ECH74115_3645	3360917	3361889	972	68	ATC	I	ACC	T	cysteine synthase A	transition
CP001164	3361788	NSYN	1	C	C	C	C	C	C	C	T	C	C	C	C	ECH74115_3645	3360917	3361889	972	872	ACC	T	ATC	I	cysteine synthase A	transition
CP001164	3363065	SYN	1	A	A	A	A	A	A	A	A	A	A	G	G	ECH74115_3647	3362574	3364302	1728	492	ACA	T	ACG	T	phosphoenolpyruvate-protein phosphotransferase	transition
CP001164	3363377	SYN	1	A	A	A	A	A	A	A	A	A	A	A	G	ECH74115_3647	3362574	3364302	1728	804	CAA	Q	CAG	Q	phosphoenolpyruvate-protein phosphotransferase	transition
CP001164	3364721	NSYN	1	T	A	A	A	A	A	A	T	T	T	T	T	ECH74115_3648	3364342	3364852	510	380	CTG	L	CAG	Q	PTS system, glucose-specific IIA component	transversion
CP001164	3365319	SYN	1	C	C	C	C	C	C	C	C	C	C	C	T	ECH74115_3649	3365745	3364894	852	427	TTC	F	TTC	F	pyridoxal kinase	transition
CP001164	3365832	intergenic	1	C	C	C	C	C	C	C	C	C	C	C	T	intergenic	--	--	--	--	--	--			intergenic	transition
CP001164	3366397	SYN	1	C	C	C	A	C	C	C	C	C	C	C	C	ECH74115_3651	3367131	3366220	912	735	CGC	R	CGA	R	cysteine synthase B	transversion
CP001164	3368294	NSYN	1	C	C	C	C	C	C	C	T	C	C	C	C	ECH74115_3652	3368362	3367265	1098	69	CAG	Q	CAT	H	sulfate/thiosulfate ABC transporter, ATP-binding protein	transition
CP001164	3368603	NSYN	1	G	G	G	G	G	G	G	G	G	G	G	A	ECH74115_3653	3369227	3368352	876	625	CAG	Q	AAG	K	sulfate ABC transporter, permease protein CysW	transition
CP001164	3370345	SYN	1	T	C	C	C	C	C	C	C	C	T	C	C	ECH74115_3655	3371076	3370060	1017	732	TGC	C	TGC	C	sulfate/thiosulfate ABC transporter, periplasmic sulfate/thiosulfate-binding protein	transition
CP001164	3373933	SYN	1	A	A	A	A	A	A	A	A	A	A	A	G	ECH74115_3658	3373175	3374072	897	759	GCA	A	GCG	A	N-acetylmuramic acid 6-phosphate etherase	transition
CP001164	3373940	NSYN	1	G	G	G	G	A	A	G	G	G	G	G	G	ECH74115_3658	3373175	3374072	897	766	GCG	A	ACG	T	N-acetylmuramic acid 6-phosphate etherase	transition
CP001164	3374480	NSYN	1	G	G	G	G	G	G	G	G	A	G	G	G	ECH74115_3659	3374075	3375500	1425	406	GGG	G	AGG	R	PTS system, N-acetylmuramic acid-specific EIIBC component	transition
CP001164	3374532	NSYN	1	A	G	G	G	G	G	G	G	G	A	G	G	ECH74115_3659	3374075	3375500	1425	458	GAC	D	GGC	G	PTS system, N-acetylmuramic acid-specific EIIBC component	transition
CP001164	3378247	NSYN	1	C	C	C	C	C	C	C	C	C	C	C	G	ECH74115_3662	3378436	3377861	576	190	AAC	N	GAC	D	putative lipoprotein	transversion
CP001164	3379295	NSYN	1	C	C	C	C	C	C	C	C	C	C	C	T	ECH74115_3664	3379358	3378933	426	64	GTC	V	TTC	F	acetyltransferase, GNAT family	transition
CP001164	3379823	SYN	1	G	G	G	G	G	G	G	G	G	G	G	A	ECH74115_3665	3379572	3380442	870	252	GTG	V	GTA	V	N-acetylmuramoyl-L-alanine amidase	transition
CP001164	3380913	NSYN	1	A	A	A	A	A	A	A	A	A	A	A	G	ECH74115_3666	3380445	3381345	900	469	AAA	K	GAA	E	coproporphyrinogen III oxidase, aerobic	transition
CP001164	3381352	NSYN	1	A	A	A	A	A	A	A	A	A	A	A	C	ECH74115_3667	3382402	3381350	1053	1051	TCA	S	CCA	P	putative transcriptional regulator EutR	transversion
CP001164	3384273	NSYN	1	C	T	T	C	C	C	C	C	C	C	C	C	ECH74115_3670	3384517	3383630	888	245	ACG	T	ATG	M	ethanolamine ammonia-lyase, light chain	transition
CP001164	3385071	NSYN	1	A	G	G	G	G	G	G	G	G	A	G	G	ECH74115_3671	3385899	3384538	1362	829	ACA	T	GCA	A	ethanolamine ammonia-lyase, large subunit	transition
CP001164	3385818	NSYN	1	A	G	G	G	G	G	G	G	G	A	G	G	ECH74115_3671	3385899	3384538	1362	82	ACA	T	GCA	A	ethanolamine ammonia-lyase, large subunit	transition
CP001164	3386759	NSYN	1	G	G	G	G	G	G	G	G	G	G	A	G	ECH74115_3672	3387314	3385911	1404	556	CTG	L	ATG	M	ethanolamine utilization protein EutA	transition
CP001164	3387585	NSYN	1	C	C	C	C	C	C	C	C	C	C	T	C	ECH74115_3673	3388537	3387311	1227	953	GCC	A	GTC	V	ethanolamine utilization protein EutH	transition
CP001164	3389099	SYN	1	G	G	G	G	G	G	G	G	G	G	G	A	ECH74115_3674	3389824	3388637	1188	726	GCC	A	GCA	A	ethanolamine utilization protein EutG	transition
CP001164	3390834	NSYN	1	C	T	T	T	T	T	T	T	T	C	T	T	ECH74115_3676	3392064	3390661	1404	1231	AAC	N	TAC	Y	ethanolamine utilization protein EutE	transition
CP001164	3392344	NSYN	1	G	G	G	G	G	G	G	G	G	G	A	G	ECH74115_3677	3392363	3392076	288	20	AGT	S	AAT	N	ethanolamine utilization protein	transition
CP001164	3393239	NSYN	1	C	C	C	C	A	A	C	C	C	C	C	C	ECH74115_3679	3393818	3392802	1017	580	TCC	S	ACC	T	phosphate acetyltransferase	transversion
CP001164	3393785	NSYN	1	G	G	A	G	G	G	G	G	G	G	G	G	ECH74115_3679	3393818	3392802	1017	34	TCG	S	ACG	T	phosphate acetyltransferase	transition
CP001164	3394941	NSYN	1	G	G	G	G	G	G	G	G	G	G	G	A	ECH74115_3681	3395244	3394543	702	304	CTG	L	ATG	M	ethanolamine utilization protein EutQ	transition
CP001164	3396304	intergenic	1	G	G	G	G	G	G	T	G	G	G	G	G	intergenic	--	--	--	--	--	--			intergenic	transversion
CP001164	3397407	SYN	1	A	G	G	G	G	G	G	G	G	A	G	G	ECH74115_3684	3398618	3396339	2280	1212	ACC	T	ACG	T	NADP-dependent malic enzyme	transition
CP001164	3398313	NSYN	1	A	A	A	A	A	A	A	A	A	A	A	G	ECH74115_3684	3398618	3396339	2280	306	AGC	S	AGG	R	NADP-dependent malic enzyme	transition
CP001164	3399485	SYN	1	A	A	A	A	A	A	A	A	A	A	A	G	ECH74115_3685	3398907	3399858	951	579	CCA	P	CCG	P	transaldolase	transition
CP001164	3400691	NSYN	1	T	C	C	C	C	C	C	C	C	T	C	C	ECH74115_3686	3399877	3401881	2004	815	GTA	V	GCA	A	transketolase	transition
CP001164	3400729	NSYN	1	A	A	A	A	A	A	A	A	A	A	A	C	ECH74115_3686	3399877	3401881	2004	853	ATC	I	CTC	L	transketolase	transversion
CP001164	3400752	SYN	1	T	T	T	T	T	T	T	T	T	T	T	C	ECH74115_3686	3399877	3401881	2004	876	GCT	A	GCC	A	transketolase	transition
CP001164	3405986	SYN	1	A	A	A	A	A	A	A	A	A	A	A	C	ECH74115_3690	3405972	3407673	1701	15	CGA	R	CGC	R	nitrate/nitrite sensor histidine kinase NarQ	transversion
CP001164	3406162	NSYN	1	C	C	C	C	C	C	C	C	C	C	C	G	ECH74115_3690	3405972	3407673	1701	191	ACT	T	AGT	S	nitrate/nitrite sensor histidine kinase NarQ	transversion
CP001164	3407288	NSYN	1	G	G	G	G	G	G	G	G	T	G	G	G	ECH74115_3690	3405972	3407673	1701	1317	ATG	M	ATT	I	nitrate/nitrite sensor histidine kinase NarQ	transversion
CP001164	3407465	SYN	1	G	G	G	G	G	G	G	G	G	G	G	A	ECH74115_3690	3405972	3407673	1701	1494	CCG	P	CCA	P	nitrate/nitrite sensor histidine kinase NarQ	transition
CP001164	3408214	NSYN	1	G	T	T	G	G	G	G	G	G	G	G	G	ECH74115_3691	3407836	3410950	3114	379	GTG	V	TTG	L	acriflavine resistance protein D	transversion
CP001164	3411702	NSYN	1	T	T	T	T	T	T	T	T	T	T	T	A	ECH74115_3692	3411488	3411845	357	215	ATA	I	AAA	K	ArsC family protein	transversion
CP001164	3412354	SYN	1	A	A	A	A	A	A	A	A	A	A	G	A	ECH74115_3693	3411848	3412976	1128	507	GTA	V	GTG	V	succinyl-diaminopimelate desuccinylase	transition
CP001164	3413313	NSYN	1	C	C	C	C	C	C	C	C	C	C	C	T	ECH74115_3695	3413982	3413284	699	670	GCC	A	TCC	S	phospholipase/carboxylesterase	transition
CP001164	3415130	NSYN	1	C	T	C	C	C	C	C	C	C	C	C	C	ECH74115_3696	3416071	3414056	2016	942	CAG	Q	CAT	H	conserved hypothetical protein	transition
CP001164	3415334	NSYN	1	A	A	A	A	A	A	A	A	A	A	A	C	ECH74115_3696	3416071	3414056	2016	738	AGG	R	AGC	S	conserved hypothetical protein	transversion
CP001164	3415552	NSYN	1	C	C	C	C	C	C	C	C	C	C	T	C	ECH74115_3696	3416071	3414056	2016	520	GCC	A	TCC	S	conserved hypothetical protein	transition
CP001164	3417137	NSYN	1	G	G	G	G	G	G	G	G	G	G	A	G	ECH74115_3698	3417830	3417117	714	694	CAG	Q	AAG	K	phosphoribosylaminoimidazole-succinocarboxamide synthase	transition
CP001164	3417389	NSYN	1	G	G	G	G	G	G	G	G	G	G	G	A	ECH74115_3698	3417830	3417117	714	442	CAG	Q	AAG	K	phosphoribosylaminoimidazole-succinocarboxamide synthase	transition
CP001164	3418843	NSYN	1	C	C	C	C	C	C	C	C	C	C	C	T	ECH74115_3699	3419077	3418043	1035	235	CGC	R	TGC	C	lipoprotein, NlpB/DapX family	transition
CP001164	3419768	NSYN	1	C	C	C	C	C	C	C	C	C	C	C	T	ECH74115_3700	3419972	3419094	879	205	CCC	P	TCC	S	dihydrodipicolinate synthase	transition
CP001164	3421358	intergenic	1	G	A	A	A	A	A	A	A	A	G	G	G	intergenic	--	--	--	--	--	--			intergenic	transition
CP001164	3423554	NSYN	1	A	A	A	A	A	A	C	A	A	A	A	A	ECH74115_3704	3422030	3424049	2019	1525	ACC	T	CCC	P	hydrogenase-4 component B	transversion
CP001164	3423653	NSYN	1	C	C	C	C	C	C	T	C	C	C	C	C	ECH74115_3704	3422030	3424049	2019	1624	CCT	P	TCT	S	hydrogenase-4 component B	transition
CP001164	3425474	NSYN	1	T	T	T	T	T	T	T	T	T	T	T	C	ECH74115_3706	3425023	3426463	1440	452	GTG	V	GCG	A	hydrogenase-4 component D	transition
CP001164	3425813	NSYN	1	G	G	G	G	G	G	G	G	G	G	A	G	ECH74115_3706	3425023	3426463	1440	791	GGC	G	GAC	D	hydrogenase-4 component D	transition
CP001164	3426828	NSYN	1	T	C	C	C	C	C	C	C	C	T	C	C	ECH74115_3707	3426474	3427125	651	355	TCG	S	CCG	P	hydrogenase 4, membrane subunit	transition
CP001164	3427227	SYN	1	C	C	C	C	C	C	C	C	C	C	T	C	ECH74115_3708	3427144	3428710	1566	84	CGC	R	CGT	R	hydrogenase-4, F subunit	transition
CP001164	3427683	SYN	1	A	G	G	G	G	G	G	G	G	A	G	G	ECH74115_3708	3427144	3428710	1566	540	CTA	L	CTG	L	hydrogenase-4, F subunit	transition
CP001164	3430818	NSYN	1	T	T	T	T	T	T	T	T	T	T	T	C	ECH74115_3710	3430424	3430970	546	395	CTG	L	CCG	P	iron-sulfur cluster-binding protein	transition
CP001164	3432234	SYN	1	A	A	A	A	A	A	A	A	A	A	A	G	ECH74115_3713	3432160	3434173	2013	75	GCA	A	GCG	A	formate hydrogenlyase transcriptional activator	transition
CP001164	3432817	NSYN	1	C	C	C	C	C	C	C	C	C	C	C	A	ECH74115_3713	3432160	3434173	2013	658	CGC	R	AGC	S	formate hydrogenlyase transcriptional activator	transversion
CP001164	3436227	intergenic	1	G	G	G	G	G	G	G	G	G	G	G	A	intergenic	--	--	--	--	--	--			intergenic	transition
CP001164	3436820	NSYN	1	A	A	A	A	A	A	A	A	A	A	A	G	ECH74115_3716	3436354	3437818	1464	467	AAC	N	AGC	S	peptidase, M48 family	transition
CP001164	3442851	NSYN	1	C	C	C	C	C	C	C	C	C	C	C	A	ECH74115_3723	3442494	3443133	639	358	CCC	P	ACC	T	phosphoribosylglycinamide formyltransferase	transversion
CP001164	3443266	intergenic	1	G	G	G	G	G	G	G	G	G	G	A	G	intergenic	--	--	--	--	--	--			intergenic	transition
CP001164	3443433	NSYN	1	A	A	A	A	A	A	A	G	A	A	A	A	ECH74115_3724	3443303	3445370	2067	131	AAT	N	AGT	S	polyphosphate kinase	transition
CP001164	3444935	SYN	1	C	C	C	C	C	C	C	C	T	C	C	C	ECH74115_3724	3443303	3445370	2067	1633	CTG	L	TTG	L	polyphosphate kinase	transition
CP001164	3450390	NSYN	1	G	G	G	G	G	G	G	G	A	G	G	G	ECH74115_3729	3450054	3450570	516	337	GTG	V	ATG	M	surface antigen family protein	transition
CP001164	3451753	SYN	1	C	C	C	C	C	C	C	C	C	C	T	C	ECH74115_3731	3452794	3451217	1578	1042	TGC	C	TGC	C	GMP synthetase	transition
CP001164	3454077	SYN	1	G	G	G	G	G	G	G	A	G	G	G	G	ECH74115_3732	3454374	3452863	1512	298	ACG	T	ACG	T	inosine-5'-monophosphate dehydrogenase	transition
CP001164	3454347	NSYN	1	G	G	G	G	A	A	G	G	G	G	G	G	ECH74115_3732	3454374	3452863	1512	28	CAG	Q	AAG	K	inosine-5'-monophosphate dehydrogenase	transition
CP001164	3454446	intergenic	1	C	C	C	T	T	T	C	C	C	C	C	C	intergenic	--	--	--	--	--	--			intergenic	transition
CP001164	3458156	NSYN	1	G	G	G	G	G	G	G	G	G	G	G	A	ECH74115_3736	3458910	3457732	1179	755	GGC	G	GAC	D	outer membrane assembly lipoprotein YfgL	transition
CP001164	3459502	NSYN	1	T	T	T	T	T	T	T	T	T	T	T	C	ECH74115_3737	3459541	3458921	621	40	AAT	N	CAT	H	conserved hypothetical protein	transition
CP001164	3462097	NSYN	1	C	C	C	C	C	C	C	C	T	C	C	C	ECH74115_3741	3463102	3462089	1014	1006	CGC	R	TGC	C	helix-turn-helix DNA-binding domain protein	transition
CP001164	3462380	SYN	1	A	A	A	A	A	A	A	A	A	A	T	A	ECH74115_3741	3463102	3462089	1014	723	ATC	I	ATT	I	helix-turn-helix DNA-binding domain protein	transversion
CP001164	3465414	NSYN	1	A	A	A	A	A	A	A	A	A	A	A	G	ECH74115_3744	3466117	3465263	855	704	AAC	N	AGC	S	putative polyferredoxin	transition
CP001164	3465748	SYN	1	A	A	A	A	A	A	A	A	A	A	A	G	ECH74115_3744	3466117	3465263	855	370	GCA	A	GCA	A	putative polyferredoxin	transition
CP001164	3465898	SYN	1	A	A	A	A	A	A	A	A	A	A	A	G	ECH74115_3744	3466117	3465263	855	220	GCA	A	GCA	A	putative polyferredoxin	transition
CP001164	3467065	SYN	1	G	G	G	G	G	G	G	G	G	G	G	A	ECH74115_3746	3467560	3466931	630	496	AGG	R	AGG	R	dimethylsulfoxide reductase, chain B	transition
CP001164	3467729	NSYN	1	G	G	G	G	G	G	G	G	A	G	G	G	ECH74115_3747	3469938	3467557	2382	2210	GGT	G	GAT	D	anaerobic dimethyl sulfoxide reductase, A subunit, DmsA/YnfE family	transition
CP001164	3468314	NSYN	1	G	G	G	G	G	G	G	G	G	G	A	A	ECH74115_3747	3469938	3467557	2382	1625	CGG	R	CAG	Q	anaerobic dimethyl sulfoxide reductase, A subunit, DmsA/YnfE family	transition
CP001164	3470068	intergenic	1	T	T	T	T	T	T	T	T	T	T	C	T	intergenic	--	--	--	--	--	--			intergenic	transition
CP001164	3470177	SYN	1	C	C	C	C	C	C	C	C	C	C	C	A	ECH74115_3748	3472414	3470102	2313	2238	CGT	R	CGA	R	penicillin-binding protein 1C	transversion
CP001164	3472692	NSYN	1	A	A	A	A	A	A	A	A	A	A	A	C	ECH74115_3749	3477376	3472415	4962	4685	CAG	Q	CCG	P	alpha-2-macroglobulin domain protein	transversion
CP001164	3473432	SYN	1	C	C	T	C	C	C	C	C	C	C	C	C	ECH74115_3749	3477376	3472415	4962	3945	CAC	H	CAT	H	alpha-2-macroglobulin domain protein	transition
CP001164	3479609	SYN	1	G	G	G	G	G	G	G	G	G	G	A	G	ECH74115_3752	3479704	3478928	777	96	GGA	G	GGA	G	sseB protein	transition
CP001164	3482517	SYN	1	G	G	G	G	G	G	G	G	G	G	A	G	ECH74115_3757	3483707	3481857	1851	1191	GCC	A	GCA	A	Fe-S protein assembly chaperone HscA	transition
CP001164	3487665	SYN	1	G	G	G	G	G	G	A	G	G	G	G	G	ECH74115_3764	3487941	3487204	738	277	CGG	R	AGG	R	RNA methyltransferase, TrmH family, group 1	transition
CP001164	3488533	SYN	1	C	G	G	G	G	G	G	G	G	C	G	G	ECH74115_3765	3488060	3488864	804	474	CCC	P	CCG	P	inositol-1-monophosphatase	transversion
CP001164	3489872	intergenic	1	G	G	G	G	G	G	G	G	T	G	G	G	intergenic	--	--	--	--	--	--			intergenic	transversion
CP001164	3491261	SYN	1	G	G	G	G	G	G	G	G	G	G	A	G	ECH74115_3768	3490053	3491334	1281	1209	CCG	P	CCA	P	stationary phase inducible protein CsiE	transition
CP001164	3494909	intergenic	1	T	T	T	T	T	T	T	T	T	T	T	C	intergenic	--	--	--	--	--	--			intergenic	transition
CP001164	3495379	SYN	1	A	C	C	C	C	C	C	A	A	A	A	A	ECH74115_3771	3495008	3495527	519	372	GCA	A	GCC	A	3-phenylpropionate dioxygenase beta subunit	transversion
CP001164	3499250	SYN	1	G	G	G	G	G	G	G	G	G	G	G	A	ECH74115_3776	3499306	3498434	873	57	GCC	A	GCA	A	aldose 1-epimerase family protein	transition
CP001164	3499811	intergenic	1	C	C	C	C	C	C	C	C	C	C	C	G	intergenic	--	--	--	--	--	--			intergenic	transversion
CP001164	3500190	intergenic	1	A	A	A	A	A	A	A	A	A	A	A	G	intergenic	--	--	--	--	--	--			intergenic	transition
CP001164	3501168	SYN	1	T	T	T	T	T	T	T	T	T	T	T	C	ECH74115_3779	3501443	3500445	999	276	TAC	Y	TAC	Y	putative sugar ABC transporter, permease protein	transition
CP001164	3501622	NSYN	1	T	T	T	T	T	T	T	A	T	T	T	T	ECH74115_3780	3502979	3501468	1512	1358	TTC	F	TAC	Y	putative sugar ABC transporter, ATP-binding protein	transversion
CP001164	3503284	SYN	1	A	G	G	G	G	G	G	G	G	A	G	G	ECH74115_3781	3503985	3503002	984	702	ACC	T	ACG	T	sugar ABC transporter, periplasmic sugar-binding protein	transition
CP001164	3504883	SYN	1	T	T	T	T	T	T	T	T	T	T	C	T	ECH74115_3782	3507456	3504082	3375	2574	TCC	S	TCC	S	tetratricopeptide repeat protein	transition
CP001164	3505300	NSYN	1	A	A	A	A	A	A	A	A	A	A	A	G	ECH74115_3782	3507456	3504082	3375	2157	ATT	I	ATG	M	tetratricopeptide repeat protein	transition
CP001164	3506110	SYN	1	T	T	T	T	T	T	T	T	T	T	T	C	ECH74115_3782	3507456	3504082	3375	1347	TCT	S	TCC	S	tetratricopeptide repeat protein	transition
CP001164	3506382	NSYN	1	G	G	G	G	G	G	G	G	G	G	G	A	ECH74115_3782	3507456	3504082	3375	1075	CCG	P	ACG	T	tetratricopeptide repeat protein	transition
CP001164	3507128	NSYN	1	C	C	C	C	C	C	T	C	C	C	C	C	ECH74115_3782	3507456	3504082	3375	329	CCG	P	CTG	L	tetratricopeptide repeat protein	transition
CP001164	3507951	SYN	1	G	A	A	A	A	A	G	G	G	G	G	G	ECH74115_3783	3507481	3508675	1194	471	GTG	V	GTA	V	ROK family protein	transition
CP001164	3509409	SYN	1	G	G	G	G	G	G	G	G	G	G	A	G	ECH74115_3784	3509990	3508737	1254	582	GCC	A	GCA	A	serine hydroxymethyltransferase	transition
CP001164	3510200	NSYN	1	T	T	T	T	T	T	T	T	T	T	T	C	ECH74115_3785	3510142	3510271	129	59	ATT	I	ACT	T	conserved hypothetical protein	transition
CP001164	3513528	NSYN	1	C	C	C	C	C	C	C	C	C	C	T	C	ECH74115_3789	3513911	3513276	636	384	CAG	Q	CAT	H	putative lipoprotein	transition
CP001164	3514742	NSYN	1	G	G	G	G	G	G	G	G	G	G	G	A	ECH74115_3790	3515581	3514154	1428	840	GAC	D	GAA	E	sensor histidine kinase	transition
CP001164	3517780	SYN	1	T	T	T	T	T	T	T	T	C	T	T	T	ECH74115_3792	3520044	3516157	3888	2265	TTC	F	TTC	F	phosphoribosylformylglycinamidine synthase	transition
CP001164	3518118	NSYN	1	G	A	A	A	A	A	A	G	G	G	G	G	ECH74115_3792	3520044	3516157	3888	1927	CAG	Q	AAG	K	phosphoribosylformylglycinamidine synthase	transition
CP001164	3519509	NSYN	1	C	C	C	C	C	C	C	G	C	C	C	C	ECH74115_3792	3520044	3516157	3888	536	GCC	A	GGC	G	phosphoribosylformylglycinamidine synthase	transversion
CP001164	3519631	SYN	1	A	C	C	C	C	C	C	C	C	A	C	C	ECH74115_3792	3520044	3516157	3888	414	AGT	S	AGC	S	phosphoribosylformylglycinamidine synthase	transversion
CP001164	3522421	NSYN	1	C	C	C	C	C	C	C	C	C	C	T	C	ECH74115_3795	3523050	3522415	636	630	CAG	Q	CAT	H	HAD hydrolase YhfB	transition
CP001164	3529287	SYN	1	C	C	C	C	C	C	C	C	C	C	C	T	ECH74115_3805	3529811	3528837	975	525	CTG	L	CTT	L	signal peptidase I	transition
CP001164	3529639	NSYN	1	G	G	G	G	G	G	G	G	G	G	A	G	ECH74115_3805	3529811	3528837	975	173	AGG	R	AAG	K	signal peptidase I	transition
CP001164	3530217	NSYN	1	A	G	G	G	G	G	G	G	G	A	G	G	ECH74115_3806	3531626	3529827	1800	1410	ATA	I	ATG	M	GTP-binding protein LepA	transition
CP001164	3531866	SYN	1	G	G	G	G	G	G	G	G	G	G	A	G	ECH74115_3807	3532303	3531824	480	438	GCC	A	GCA	A	sigma-E factor regulatory protein RseC	transition
CP001164	3534819	intergenic	1	T	T	T	T	T	T	T	T	T	T	T	C	intergenic	--	--	--	--	--	--			intergenic	transition
CP001164	3537062	SYN	1	G	G	G	G	G	G	G	G	G	G	G	T	ECH74115_3811	3537254	3536517	738	193	TCG	S	TCG	S	putative methyltransferase	transversion
CP001164	3537169	NSYN	1	G	A	A	A	A	A	A	A	A	G	A	A	ECH74115_3811	3537254	3536517	738	86	CGC	R	CAC	H	putative methyltransferase	transition
CP001164	3538570	SYN	1	G	G	G	G	G	G	G	G	G	G	A	G	ECH74115_3813	3537386	3538721	1335	1185	TCG	S	TCA	S	ATP-dependent RNA helicase SrmB	transition
CP001164	3539867	NSYN	1	C	C	C	C	C	C	C	C	C	C	C	T	ECH74115_3815	3539737	3540325	588	131	GCA	A	GTA	V	translocator protein, LysE family	transition
CP001164	3540615	NSYN	1	C	C	C	C	C	C	C	T	C	C	C	C	ECH74115_3816	3540763	3540380	384	149	ACC	T	ATC	I	autonomous glycyl radical cofactor	transition
CP001164	3540916	intergenic	1	A	A	A	A	A	A	A	A	A	A	A	G	intergenic	--	--	--	--	--	--			intergenic	transition
CP001164	3540945	intergenic	1	G	G	G	G	G	G	G	G	G	G	G	A	intergenic	--	--	--	--	--	--			intergenic	transition
CP001164	3544031	SYN	1	A	G	G	G	G	G	G	G	G	A	G	G	ECH74115_3820	3543537	3544236	699	495	CGA	R	CGG	R	DTW domain protein	transition
CP001164	3546312	SYN	1	C	C	C	C	C	C	C	C	C	C	T	C	ECH74115_3821	3544267	3546928	2661	2046	GGC	G	GGT	G	acetyltransferase, GNAT family protein	transition
CP001164	3546979	intergenic	1	A	A	A	A	A	A	A	A	A	A	A	C	intergenic	--	--	--	--	--	--			intergenic	transversion
CP001164	3547299	NSYN	1	C	G	G	G	G	G	G	G	G	C	G	G	ECH74115_3822	3547041	3548397	1356	259	CTC	L	GTC	V	CDP-diacylglycerol--serine O-phosphatidyltransferase	transversion
CP001164	3549806	SYN	1	G	A	A	A	A	A	A	A	A	G	G	G	ECH74115_3823	3550141	3548762	1380	336	GCG	A	GCA	A	alpha-ketoglutarate permease	transition
CP001164	3549863	SYN	1	T	T	T	T	T	T	T	T	T	T	C	T	ECH74115_3823	3550141	3548762	1380	279	TGC	C	TGC	C	alpha-ketoglutarate permease	transition
CP001164	3550139	SYN	1	C	C	C	C	C	C	C	C	C	C	T	C	ECH74115_3823	3550141	3548762	1380	3	CAT	H	CAT	H	alpha-ketoglutarate permease	transition
CP001164	3556038	SYN	1	T	T	T	T	T	T	T	C	T	T	T	T	ECH74115_3833	3558401	3555828	2574	2364	TTC	F	TTC	F	ATP-dependent chaperone ClpB	transition
CP001164	3556239	SYN	1	A	A	A	A	A	A	A	A	A	A	A	G	ECH74115_3833	3558401	3555828	2574	2163	ACC	T	ACG	T	ATP-dependent chaperone ClpB	transition
CP001164	3558246	SYN	1	G	G	G	G	G	G	G	G	G	G	G	A	ECH74115_3833	3558401	3555828	2574	156	GGA	G	GGA	G	ATP-dependent chaperone ClpB	transition
CP001164	3560947	NSYN	1	G	G	A	G	G	G	G	G	G	G	G	G	ECH74115_3836	3560374	3561112	738	574	GTT	V	ATT	I	outer membrane assembly lipoprotein YfiO	transition
CP001164	3565157	NSYN	1	A	A	A	A	A	A	A	A	A	A	A	G	ECH74115_3840	3565378	3564308	1071	222	AGC	S	AGG	R	3-deoxy-7-phosphoheptulonate synthase, Tyr-sensitive	transition
CP001164	3565524	intergenic	1	C	C	C	C	C	C	C	C	C	C	T	C	intergenic	--	--	--	--	--	--			intergenic	transition
CP001164	3566740	NSYN	1	C	C	C	C	C	C	C	C	C	C	C	A	ECH74115_3843	3566614	3567838	1224	127	CCC	P	ACC	T	diguanylate cyclase (GGDEF) domain protein	transversion
CP001164	3568327	NSYN	1	C	C	C	C	C	C	C	C	C	C	A	A	ECH74115_3844	3567853	3568336	483	475	CCC	P	ACC	T	OmpA family protein	transversion
CP001164	3570863	SYN	1	C	A	A	A	A	A	A	C	C	C	C	C	ECH74115_3849	3571912	3570551	1362	1050	CAG	Q	CAA	Q	signal recognition particle protein	transversion
CP001164	3572420	SYN	1	C	C	C	C	C	C	C	C	C	C	T	C	ECH74115_3850	3572004	3572871	867	417	TAC	Y	TAT	Y	putative cytochrome C assembly protein	transition
CP001164	3573007	intergenic	1	T	G	G	G	G	G	G	G	G	T	G	G	intergenic	--	--	--	--	--	--			intergenic	transversion
CP001164	3573481	intergenic	1	T	C	C	C	C	C	C	T	T	T	T	T	intergenic	--	--	--	--	--	--			intergenic	transition
CP001164	3574242	NSYN	1	A	G	G	G	G	G	G	G	G	A	G	G	ECH74115_3853	3574825	3574232	594	584	TAC	Y	TGC	C	co-chaperone GrpE	transition
CP001164	3575185	NSYN	1	A	A	A	A	A	A	A	A	A	A	A	G	ECH74115_3855	3574948	3575827	879	238	ACG	T	GCG	A	NAD(+) kinase	transition
CP001164	3577323	NSYN	1	C	C	C	C	C	C	C	C	C	C	T	C	ECH74115_3856	3575912	3577574	1662	1412	GCA	A	GTA	V	DNA repair protein RecN	transition
CP001164	3577372	NSYN	1	G	G	G	G	G	G	A	G	G	G	G	G	ECH74115_3856	3575912	3577574	1662	1461	ATG	M	ATA	I	DNA repair protein RecN	transition
CP001164	3577601	intergenic	1	A	A	A	A	A	A	A	A	A	A	A	T	intergenic	--	--	--	--	--	--			intergenic	transversion
CP001164	3580293	intergenic	1	T	T	T	T	T	T	T	T	T	T	T	C	intergenic	--	--	--	--	--	--			intergenic	transition
CP001164	3581679	intergenic	1	A	C	C	C	C	C	C	C	C	A	C	C	intergenic	--	--	--	--	--	--			intergenic	transversion
CP001164	3582178	intergenic	1	G	G	G	G	G	G	G	G	G	G	G	A	intergenic	--	--	--	--	--	--			intergenic	transition
CP001164	3582648	NSYN	1	A	A	A	A	A	A	A	A	A	A	A	C	ECH74115_3869	3582593	3583652	1059	56	CAA	Q	CCA	P	conserved hypothetical protein	transversion
CP001164	3594041	intergenic	1	T	T	T	T	T	T	T	T	C	T	T	T	intergenic	--	--	--	--	--	--			intergenic	transition
CP001164	3600966	NSYN	1	C	C	C	C	C	C	C	C	C	C	C	T	ECH74115_3892	3601446	3600133	1314	481	CGC	R	TGC	C	site-specific recombinase, phage integrase family protein	transition
CP001164	3602688	intergenic	1	C	A	A	A	A	A	A	C	C	C	C	C	intergenic	--	--	--	--	--	--			intergenic	transversion
CP001164	3602736	intergenic	1	G	G	G	G	G	G	G	G	G	G	G	A	intergenic	--	--	--	--	--	--			intergenic	transition
CP001164	3605152	NSYN	1	C	T	T	T	T	T	T	T	T	T	T	C	ECH74115_3895	3609275	3604560	4716	4124	GCC	A	GTC	V	hypothetical protein	transition
CP001164	3605172	SYN	1	G	G	G	G	G	G	A	G	A	G	G	G	ECH74115_3895	3609275	3604560	4716	4104	GCG	A	GCA	A	hypothetical protein	transition
CP001164	3606231	SYN	1	T	T	T	T	T	T	T	T	T	T	T	C	ECH74115_3895	3609275	3604560	4716	3045	TGT	C	TGC	C	hypothetical protein	transition
CP001164	3606312	SYN	1	A	A	A	A	A	A	A	A	A	A	A	G	ECH74115_3895	3609275	3604560	4716	2964	ACC	T	ACG	T	hypothetical protein	transition
CP001164	3606346	NSYN	1	T	T	T	T	T	T	T	T	T	T	T	A	ECH74115_3895	3609275	3604560	4716	2930	CTG	L	CAG	Q	hypothetical protein	transversion
CP001164	3606363	SYN	1	C	C	C	C	C	C	C	C	C	C	C	A	ECH74115_3895	3609275	3604560	4716	2913	CCC	P	CCA	P	hypothetical protein	transversion
CP001164	3606384	SYN	1	G	G	G	G	G	G	G	G	G	G	G	A	ECH74115_3895	3609275	3604560	4716	2892	GCG	A	GCA	A	hypothetical protein	transition
CP001164	3606387	NSYN	1	A	A	A	A	A	A	A	A	A	A	A	G	ECH74115_3895	3609275	3604560	4716	2889	AGC	S	AGG	R	hypothetical protein	transition
CP001164	3607487	NSYN	1	C	C	C	C	C	C	C	C	C	C	A	C	ECH74115_3895	3609275	3604560	4716	1789	TCC	S	ACC	T	hypothetical protein	transversion
CP001164	3607970	SYN	1	T	T	T	T	T	T	T	G	T	T	T	T	ECH74115_3895	3609275	3604560	4716	1306	GCT	A	GCT	A	hypothetical protein	transversion
CP001164	3610706	intergenic	1	T	T	T	T	T	T	T	T	G	T	T	T	intergenic	--	--	--	--	--	--			intergenic	transversion
CP001164	3611986	intergenic	1	A	A	A	A	A	A	A	A	A	A	A	G	intergenic	--	--	--	--	--	--			intergenic	transition
CP001164	3612255	intergenic	1	G	G	G	G	G	G	G	G	G	G	A	G	intergenic	--	--	--	--	--	--			intergenic	transition
CP001164	3612538	intergenic	1	T	T	T	T	T	T	T	T	T	T	T	C	intergenic	--	--	--	--	--	--			intergenic	transition
CP001164	3613378	intergenic	1	C	C	C	C	C	C	C	C	C	C	C	T	intergenic	--	--	--	--	--	--			intergenic	transition
CP001164	3614039	intergenic	1	C	C	C	C	C	C	C	C	C	C	C	A	intergenic	--	--	--	--	--	--			intergenic	transversion
CP001164	3614412	intergenic	1	A	A	A	A	A	A	A	A	A	A	A	G	intergenic	--	--	--	--	--	--			intergenic	transition
CP001164	3615015	intergenic	1	C	C	C	C	C	C	C	C	T	C	C	C	intergenic	--	--	--	--	--	--			intergenic	transition
CP001164	3615283	intergenic	1	T	T	T	T	T	T	T	T	T	T	T	G	intergenic	--	--	--	--	--	--			intergenic	transversion
CP001164	3615451	NSYN	1	A	A	A	A	A	A	A	A	A	A	A	G	ECH74115_3901	3615408	3616386	978	44	GAC	D	GGC	G	protein CsiD	transition
CP001164	3616809	SYN	1	C	C	C	C	C	C	C	C	T	C	C	C	ECH74115_3902	3616405	3617674	1269	405	GGC	G	GGT	G	FAD dependent oxidoreductase	transition
CP001164	3622166	NSYN	1	G	G	A	G	G	G	G	G	G	G	G	G	ECH74115_3906	3622097	3622760	663	70	GAT	D	AAT	N	gab operon transcriptional repressor CsiR	transition
CP001164	3622761	NSYN	1	T	T	T	T	T	T	T	T	T	T	T	A	ECH74115_3907	3623209	3622760	450	449	CTA	L	CAA	Q	phospholipid-binding protein	transversion
CP001164	3622774	NSYN	1	T	T	T	T	T	T	T	T	T	T	T	C	ECH74115_3907	3623209	3622760	450	436	AAT	N	CAT	H	phospholipid-binding protein	transition
CP001164	3625314	intergenic	1	A	A	A	A	A	A	A	A	A	A	A	C	intergenic	--	--	--	--	--	--			intergenic	transversion
CP001164	3625387	intergenic	1	G	G	G	G	G	G	G	G	A	G	G	G	intergenic	--	--	--	--	--	--			intergenic	transition
CP001164	3625451	intergenic	1	G	G	G	G	G	G	G	G	G	G	A	G	intergenic	--	--	--	--	--	--			intergenic	transition
CP001164	3631049	NSYN	1	T	T	T	T	T	T	T	T	T	T	T	G	ECH74115_3919	3629734	3631879	2145	1316	GTG	V	GGG	G	ribonucleoside-diphosphate reductase, alpha subunit	transversion
CP001164	3633316	SYN	1	C	T	T	T	T	T	T	T	T	C	T	T	ECH74115_3921	3633203	3634406	1203	114	ACC	T	ACT	T	glycine betaine/L-proline ABC transporter, ATP binding protein	transition
CP001164	3637821	SYN	1	G	G	G	G	G	G	A	G	G	G	G	G	ECH74115_3925	3636703	3637888	1185	1119	GCG	A	GCA	A	major facilitator family transporter	transition
CP001164	3639613	NSYN	1	T	G	G	G	G	G	G	G	G	T	G	G	ECH74115_3928	3639164	3639695	531	450	CAT	H	CAG	Q	transcriptional repressor MprA	transversion
CP001164	3643502	SYN	1	A	A	A	A	A	A	A	A	A	A	C	A	ECH74115_3934	3644833	3643277	1557	1332	ATC	I	ATC	I	glutamate--cysteine ligase	transversion
CP001164	3643559	SYN	1	G	G	G	T	G	G	G	G	G	G	G	G	ECH74115_3934	3644833	3643277	1557	1275	GCC	A	GCT	A	glutamate--cysteine ligase	transversion
CP001164	3644114	SYN	1	G	G	G	G	G	G	G	G	G	G	A	G	ECH74115_3934	3644833	3643277	1557	720	GCC	A	GCA	A	glutamate--cysteine ligase	transition
CP001164	3644533	SYN	1	G	G	G	G	G	G	G	G	G	G	A	G	ECH74115_3934	3644833	3643277	1557	301	CGG	R	AGG	R	glutamate--cysteine ligase	transition
CP001164	3645914	intergenic	1	G	A	A	A	A	A	G	G	G	G	G	G	intergenic	--	--	--	--	--	--			intergenic	transition
CP001164	3647644	SYN	1	A	A	A	A	A	A	A	A	A	A	A	C	ECH74115_3944	3650175	3647545	2631	2532	ACC	T	ACC	T	alanyl-tRNA synthetase	transversion
CP001164	3647647	SYN	1	A	A	A	A	A	A	A	A	A	A	A	C	ECH74115_3944	3650175	3647545	2631	2529	ACC	T	ACC	T	alanyl-tRNA synthetase	transversion
CP001164	3648330	NSYN	1	C	C	C	C	C	C	C	C	C	C	T	C	ECH74115_3944	3650175	3647545	2631	1846	CAC	H	TAC	Y	alanyl-tRNA synthetase	transition
CP001164	3650540	SYN	1	T	T	T	T	T	T	T	T	T	T	A	T	ECH74115_3945	3650803	3650303	501	264	TCC	S	TCA	S	regulatory protein RecX	transversion
CP001164	3652000	intergenic	1	G	G	G	G	G	G	G	G	G	G	A	G	intergenic	--	--	--	--	--	--			intergenic	transition
CP001164	3653956	NSYN	1	G	G	G	G	G	G	G	G	G	G	G	A	ECH74115_3949	3654007	3653870	138	52	CCG	P	ACG	T	hypothetical protein	transition
CP001164	3654379	intergenic	1	C	C	C	C	C	C	C	C	C	C	T	C	intergenic	--	--	--	--	--	--			intergenic	transition
CP001164	3655733	NSYN	1	T	T	T	T	T	T	T	T	T	T	T	C	ECH74115_3954	3655525	3655897	372	209	GTT	V	GCT	A	PTS system, glucitol/sorbitol-specific, IIA component	transition
CP001164	3658762	SYN	1	A	C	C	C	C	C	C	C	C	A	C	C	ECH74115_3959	3657977	3658943	966	786	ACA	T	ACC	T	gutQ protein	transversion
CP001164	3661731	SYN	1	T	T	T	T	T	T	T	T	T	T	T	G	ECH74115_3960	3660640	3662080	1440	1092	GGT	G	GGG	G	anaerobic nitric oxide reductase flavorubredoxin	transversion
CP001164	3664063	SYN	1	G	G	G	G	G	G	G	G	A	G	G	G	ECH74115_3962	3665637	3663337	2301	1575	GTT	V	GTA	V	carbamoyltransferase HypF	transition
CP001164	3664169	NSYN	1	A	A	A	A	A	A	A	A	A	A	A	T	ECH74115_3962	3665637	3663337	2301	1469	CAG	Q	CTG	L	carbamoyltransferase HypF	transversion
CP001164	3664743	NSYN	1	C	C	C	C	C	C	C	C	C	C	C	T	ECH74115_3962	3665637	3663337	2301	895	AAC	N	TAC	Y	carbamoyltransferase HypF	transition
CP001164	3665702	intergenic	1	C	C	C	C	C	C	C	C	A	C	C	C	intergenic	--	--	--	--	--	--			intergenic	transversion
CP001164	3666334	SYN	1	G	G	G	G	G	G	G	G	G	G	G	A	ECH74115_3964	3666414	3666247	168	81	GCT	A	GCA	A	hypothetical protein	transition
CP001164	3667589	intergenic	1	G	A	A	A	A	A	G	G	G	G	G	G	intergenic	--	--	--	--	--	--			intergenic	transition
CP001164	3668750	NSYN	1	T	C	C	C	C	C	C	C	C	T	C	C	ECH74115_3966	3667688	3669146	1458	1063	TCG	S	CCG	P	PTS system, arbutin-, cellobiose-, and salicin-specific, EIIBC component	transition
CP001164	3669546	SYN	1	A	A	A	A	A	A	A	A	A	A	A	G	ECH74115_3967	3669154	3670579	1425	393	ACA	T	ACG	T	6-phospho-beta-glucosidase	transition
CP001164	3673925	SYN	1	T	T	G	T	T	T	T	T	T	T	T	T	ECH74115_3972	3674621	3672891	1731	697	GGT	G	GGT	G	formate hydrogenlyase, subunit E	transversion
CP001164	3673964	NSYN	1	G	G	G	G	G	G	G	G	G	G	G	T	ECH74115_3972	3674621	3672891	1731	658	CAG	Q	TAG	*	formate hydrogenlyase, subunit E	transversion
CP001164	3675019	NSYN	1	G	A	A	A	A	A	A	G	G	G	G	G	ECH74115_3973	3675541	3674618	924	523	CAG	Q	AAG	K	formate hydrogenlyase, subunit D	transition
CP001164	3678745	intergenic	1	T	T	T	T	T	T	T	T	T	T	T	C	intergenic	--	--	--	--	--	--			intergenic	transition
CP001164	3679433	NSYN	1	T	T	T	T	T	T	T	T	T	T	T	C	ECH74115_3979	3679130	3680003	873	304	TGC	C	CGC	R	hydrogenase isoenzymes nickel incorporation protein HypB	transition
CP001164	3680040	SYN	1	G	G	G	G	G	G	G	G	G	G	G	A	ECH74115_3980	3679993	3680266	273	48	CAG	Q	CAA	Q	hydrogenase assembly chaperone HypC/HupF	transition
CP001164	3680533	NSYN	1	A	C	C	C	C	C	C	C	C	A	A	A	ECH74115_3981	3680265	3681387	1122	269	GAA	E	GCA	A	hydrogenase expression/formation protein HypD	transversion
CP001164	3681845	NSYN	1	A	A	A	A	A	A	A	A	A	A	A	G	ECH74115_3982	3681383	3682394	1011	463	ACG	T	GCG	A	hydrogenase expression/formation protein HypE	transition
CP001164	3681887	NSYN	1	A	A	A	A	A	A	A	A	A	A	A	G	ECH74115_3982	3681383	3682394	1011	505	ATA	I	GTA	V	hydrogenase expression/formation protein HypE	transition
CP001164	3688123	NSYN	1	G	G	G	G	G	G	A	G	G	G	G	G	ECH74115_3987	3687889	3688546	657	235	GAA	E	AAA	K	serine/threonine-protein phosphatase 2	transition
CP001164	3688697	SYN	1	A	G	G	G	G	G	G	G	G	A	G	G	ECH74115_3988	3688822	3688586	237	126	ACG	T	ACG	T	4-hydroxybenzoate decarboxylase, subunit D	transition
CP001164	3691278	SYN	1	C	C	C	C	C	C	C	C	C	C	T	C	ECH74115_3991	3691000	3691408	408	279	GCC	A	GCT	A	transcriptional regulator, MarR family	transition
CP001164	3691734	SYN	1	C	C	C	C	C	C	C	C	C	C	T	C	ECH74115_3992	3692519	3691527	993	786	CCA	P	CCT	P	RNA polymerase sigma factor RpoS	transition
CP001164	3691799	NSYN	1	C	C	C	A	C	C	C	C	C	C	C	C	ECH74115_3992	3692519	3691527	993	721	TTC	F	ATC	I	RNA polymerase sigma factor RpoS	transversion
CP001164	3691958	NSYN	1	T	T	T	T	T	T	T	T	T	T	T	G	ECH74115_3992	3692519	3691527	993	562	CTT	L	GTT	V	RNA polymerase sigma factor RpoS	transversion
CP001164	3691977	SYN	1	G	T	T	T	T	T	T	T	T	G	G	G	ECH74115_3992	3692519	3691527	993	543	GGT	G	GGT	G	RNA polymerase sigma factor RpoS	transversion
CP001164	3692137	NSYN	1	A	A	A	A	A	A	A	A	T	A	A	A	ECH74115_3992	3692519	3691527	993	383	GAT	D	GTT	V	RNA polymerase sigma factor RpoS	transversion
CP001164	3692345	NSYN	1	G	G	G	G	G	G	G	G	G	G	G	A	ECH74115_3992	3692519	3691527	993	175	CTG	L	ATG	M	RNA polymerase sigma factor RpoS	transition
CP001164	3692825	SYN	1	A	A	A	A	A	A	A	A	A	A	A	G	ECH74115_3993	3693673	3692582	1092	849	ACG	T	ACG	T	lipoprotein NlpD	transition
CP001164	3693388	NSYN	1	T	T	T	T	T	T	T	T	T	T	T	C	ECH74115_3993	3693673	3692582	1092	286	GTT	V	CTT	L	lipoprotein NlpD	transition
CP001164	3697500	NSYN	1	C	C	C	C	C	C	C	C	C	C	C	T	ECH74115_3999	3697740	3697429	312	241	GCC	A	TCC	S	cell division protein FtsB	transition
CP001164	3698508	NSYN	1	T	C	C	C	C	C	C	C	C	T	C	C	ECH74115_4002	3698912	3698307	606	405	TGG	W	TGC	C	adenylylsulfate kinase	transition
CP001164	3700198	NSYN	1	A	A	A	A	A	A	A	A	A	A	G	G	ECH74115_4003	3700339	3698912	1428	142	CAA	Q	GAA	E	sulfate adenylyltransferase, subunit 1	transition
CP001164	3700289	SYN	1	G	G	G	G	G	G	G	G	G	G	G	A	ECH74115_4003	3700339	3698912	1428	51	GGC	G	GGA	G	sulfate adenylyltransferase, subunit 1	transition
CP001164	3701882	NSYN	1	G	G	G	G	G	G	G	G	G	G	G	A	ECH74115_4005	3701501	3702539	1038	382	GAT	D	AAT	N	alkaline phosphatase isozyme conversion peptidase	transition
CP001164	3702459	NSYN	1	C	C	C	C	C	C	C	C	C	C	C	T	ECH74115_4005	3701501	3702539	1038	959	CCT	P	CTT	L	alkaline phosphatase isozyme conversion peptidase	transition
CP001164	3707691	SYN	1	C	C	C	C	C	C	C	C	C	C	C	T	ECH74115_4013	3708689	3707127	1563	999	CTT	L	CTT	L	CRISPR-associated protein, Cse1 family	transition
CP001164	3708126	SYN	1	G	G	G	G	G	G	G	G	A	G	G	G	ECH74115_4013	3708689	3707127	1563	564	GCC	A	GCA	A	CRISPR-associated protein, Cse1 family	transition
CP001164	3708864	SYN	1	C	C	C	C	C	C	C	C	C	C	C	T	ECH74115_4014	3711486	3708787	2700	2623	TGC	C	TGC	C	CRISPR-associated helicase Cas3	transition
CP001164	3711623	intergenic	1	A	A	A	A	A	A	A	A	A	A	G	G	intergenic	--	--	--	--	--	--			intergenic	transition
CP001164	3713847	SYN	1	T	T	T	T	T	T	T	T	T	T	T	C	ECH74115_4017	3714614	3712902	1713	768	TCC	S	TCC	S	sulfite reductase (NADPH) hemoprotein, beta-component	transition
CP001164	3713922	SYN	1	G	G	G	G	G	G	G	G	G	G	G	T	ECH74115_4017	3714614	3712902	1713	693	GTG	V	GTT	V	sulfite reductase (NADPH) hemoprotein, beta-component	transversion
CP001164	3714378	SYN	1	C	C	C	C	C	C	C	A	C	C	C	C	ECH74115_4017	3714614	3712902	1713	237	CGC	R	CGA	R	sulfite reductase (NADPH) hemoprotein, beta-component	transversion
CP001164	3719932	intergenic	1	C	C	C	C	C	C	C	C	C	C	C	T	intergenic	--	--	--	--	--	--			intergenic	transition
CP001164	3726247	NSYN	1	A	A	A	A	A	A	A	A	A	A	A	T	ECH74115_4031	3725106	3726384	1278	1142	CAG	Q	CTG	L	major facilitator family transporter	transversion
CP001164	3727097	NSYN	1	G	A	A	A	A	A	A	G	G	G	G	G	ECH74115_4032	3726410	3727889	1479	688	GGT	G	AGT	S	carbohydrate kinase, FGGY family protein	transition
CP001164	3727477	SYN	1	G	G	G	G	G	G	G	G	G	G	G	A	ECH74115_4032	3726410	3727889	1479	1068	ACG	T	ACA	T	carbohydrate kinase, FGGY family protein	transition
CP001164	3727642	SYN	1	G	G	G	G	G	G	G	G	A	G	G	G	ECH74115_4032	3726410	3727889	1479	1233	GGG	G	GGA	G	carbohydrate kinase, FGGY family protein	transition
CP001164	3728352	intergenic	1	G	G	G	G	G	G	G	G	G	G	G	A	intergenic	--	--	--	--	--	--			intergenic	transition
CP001164	3728562	intergenic	1	A	A	A	A	A	A	A	A	A	A	A	T	intergenic	--	--	--	--	--	--			intergenic	transversion
CP001164	3730402	intergenic	1	G	G	G	G	G	G	G	G	G	G	G	A	intergenic	--	--	--	--	--	--			intergenic	transition
CP001164	3730690	intergenic	1	C	A	A	A	A	A	A	C	C	C	C	C	intergenic	--	--	--	--	--	--			intergenic	transversion
CP001164	3731761	NSYN	1	G	G	G	G	G	G	G	G	G	G	G	A	ECH74115_4037	3731320	3732469	1149	442	GCA	A	ACA	T	putative membrane protein	transition
CP001164	3734186	SYN	1	G	G	G	G	G	G	G	G	G	G	G	A	ECH74115_4039	3734737	3733439	1299	552	GCG	A	GCA	A	phosphopyruvate hydratase	transition
CP001164	3737146	NSYN	1	A	A	A	A	A	A	A	A	A	A	A	C	ECH74115_4041	3737481	3736690	792	336	AAG	K	AAC	N	MazG family protein	transversion
CP001164	3737385	NSYN	1	C	C	C	C	C	C	C	C	C	C	T	C	ECH74115_4041	3737481	3736690	792	97	CGC	R	TGC	C	MazG family protein	transition
CP001164	3738173	intergenic	1	T	T	T	T	T	T	T	T	T	T	T	C	intergenic	--	--	--	--	--	--			intergenic	transition
CP001164	3738211	intergenic	1	G	G	G	G	G	G	G	G	A	G	G	G	intergenic	--	--	--	--	--	--			intergenic	transition
CP001164	3739518	SYN	1	G	G	G	G	G	G	G	G	G	G	G	A	ECH74115_4044	3740447	3738213	2235	930	GTA	V	GTA	V	GTP diphosphokinase	transition
CP001164	3747094	intergenic	1	C	C	C	C	C	C	C	C	A	C	C	C	intergenic	--	--	--	--	--	--			intergenic	transversion
CP001164	3749809	NSYN	1	C	C	C	C	C	C	C	C	C	C	C	A	ECH74115_4054	3750581	3749799	783	773	TCT	S	TAT	Y	tRNA pseudouridine synthase C	transversion
CP001164	3750934	intergenic	1	T	T	T	T	T	T	T	T	A	T	T	T	intergenic	--	--	--	--	--	--			intergenic	transversion
CP001164	3751463	intergenic	1	T	T	T	T	T	T	T	T	T	T	A	T	intergenic	--	--	--	--	--	--			intergenic	transversion
CP001164	3755436	SYN	1	G	G	G	G	G	G	G	G	G	G	A	G	ECH74115_4060	3755026	3756316	1290	411	CCG	P	CCA	P	serine transporter family protein	transition
CP001164	3757194	SYN	1	G	G	G	G	G	G	G	G	G	G	G	A	ECH74115_4061	3756373	3757741	1368	822	GAG	E	GAA	E	L-serine ammonia-lyase 2	transition
CP001164	3758509	NSYN	1	A	A	A	A	A	A	A	A	A	A	C	A	ECH74115_4062	3757852	3758608	756	658	ACC	T	CCC	P	exodeoxyribonuclease-9	transversion
CP001164	3760450	NSYN	1	T	G	G	G	G	G	G	G	G	T	G	G	ECH74115_4064	3760485	3759838	648	36	TTC	F	TTG	L	L-fuculose phosphate aldolase	transversion
CP001164	3760777	intergenic	1	A	G	G	G	G	G	G	G	G	A	G	G	intergenic	--	--	--	--	--	--			intergenic	transition
CP001164	3760969	intergenic	1	A	A	A	A	A	A	A	A	A	A	A	G	intergenic	--	--	--	--	--	--			intergenic	transition
CP001164	3763370	NSYN	1	A	A	A	A	A	A	A	A	A	A	C	A	ECH74115_4066	3762381	3764157	1776	990	GAA	E	GAC	D	L-fucose isomerase	transversion
CP001164	3764279	SYN	1	G	G	G	G	G	G	G	G	G	G	G	T	ECH74115_4067	3764235	3765684	1449	45	GTG	V	GTT	V	L-fuculokinase	transversion
CP001164	3765634	NSYN	1	A	T	T	T	T	T	T	T	T	A	A	A	ECH74115_4067	3764235	3765684	1449	1400	TAC	Y	TTC	F	L-fuculokinase	transversion
CP001164	3767679	NSYN	1	C	C	C	C	C	C	C	T	C	C	C	C	ECH74115_4070	3768040	3766940	1101	362	ACG	T	ATG	M	conserved hypothetical protein	transition
CP001164	3768133	NSYN	1	G	G	G	G	G	G	A	G	G	G	G	G	ECH74115_4071	3768428	3768033	396	296	CGC	R	CAC	H	putative membrane protein	transition
CP001164	3770232	NSYN	1	A	A	A	A	A	A	A	C	A	A	A	A	ECH74115_4075	3770134	3771340	1206	99	GAA	E	GAC	D	cysteine desulfurase, catalytic subunit CsdA	transversion
CP001164	3770451	SYN	1	G	G	G	G	G	G	G	G	A	G	G	G	ECH74115_4075	3770134	3771340	1206	318	CTG	L	CTA	L	cysteine desulfurase, catalytic subunit CsdA	transition
CP001164	3770880	SYN	1	C	C	C	C	C	C	C	C	C	C	C	T	ECH74115_4075	3770134	3771340	1206	747	GGC	G	GGT	G	cysteine desulfurase, catalytic subunit CsdA	transition
CP001164	3772348	NSYN	1	A	A	A	A	A	A	A	A	A	A	A	G	ECH74115_4077	3772633	3771833	801	286	CGA	R	GGA	G	ThiF family protein	transition
CP001164	3776807	NSYN	1	T	G	G	G	G	G	G	G	G	T	G	G	ECH74115_4083	3776039	3777371	1332	769	TCC	S	GCC	A	amino-acid N-acetyltransferase	transversion
CP001164	3783061	NSYN	1	A	A	A	A	A	A	A	A	A	A	A	G	ECH74115_4086	3785681	3782793	2889	2621	CAA	Q	CGA	R	protease III	transition
CP001164	3787087	SYN	1	G	G	G	G	G	G	G	G	G	G	A	G	ECH74115_4087	3789225	3785857	3369	2139	GCG	A	GCA	A	exodeoxyribonuclease V, gamma subunit	transition
CP001164	3788411	NSYN	1	C	T	T	T	T	T	T	T	T	C	C	C	ECH74115_4087	3789225	3785857	3369	815	GCG	A	GTG	V	exodeoxyribonuclease V, gamma subunit	transition
CP001164	3789253	SYN	1	G	A	A	A	A	A	A	G	G	G	G	G	ECH74115_4088	3789561	3789238	324	309	GCA	A	GCA	A	prepilin peptidase-dependent protein C	transition
CP001164	3789987	NSYN	1	A	A	A	A	A	A	A	A	A	A	A	G	ECH74115_4090	3790513	3789950	564	527	CAC	H	CGC	R	prepilin peptidase dependent protein B	transition
CP001164	3790041	NSYN	1	A	G	G	G	G	G	G	G	G	A	G	G	ECH74115_4090	3790513	3789950	564	473	CAG	Q	CGG	R	prepilin peptidase dependent protein B	transition
CP001164	3796361	NSYN	1	A	A	A	A	A	A	A	A	A	A	G	A	ECH74115_4097	3796219	3796381	162	143	CAA	Q	CGA	R	hypothetical protein	transition
CP001164	3799251	SYN	1	A	G	G	G	G	G	G	G	G	A	G	G	ECH74115_4101	3798394	3799435	1041	858	CTA	L	CTG	L	NADP(H)-dependent aldo-keto reductase Tas	transition
CP001164	3799253	NSYN	1	C	C	C	C	C	C	C	C	C	C	C	A	ECH74115_4101	3798394	3799435	1041	860	GCC	A	GAC	D	NADP(H)-dependent aldo-keto reductase Tas	transversion
CP001164	3800936	NSYN	1	G	G	G	G	G	G	G	G	G	G	G	A	ECH74115_4103	3802811	3800652	2160	1876	CAG	Q	AAG	K	2-acyl-glycerophospho-ethanolamine acyltransferase/acyl-acyl-carrier protein synthetase	transition
CP001164	3801013	NSYN	1	C	C	C	C	C	C	C	C	T	C	C	C	ECH74115_4103	3802811	3800652	2160	1799	ACG	T	ATG	M	2-acyl-glycerophospho-ethanolamine acyltransferase/acyl-acyl-carrier protein synthetase	transition
CP001164	3801828	SYN	1	T	C	C	C	C	C	C	C	C	T	C	C	ECH74115_4103	3802811	3800652	2160	984	TAC	Y	TAC	Y	2-acyl-glycerophospho-ethanolamine acyltransferase/acyl-acyl-carrier protein synthetase	transition
CP001164	3802801	NSYN	1	C	C	C	C	C	C	C	C	C	C	C	A	ECH74115_4103	3802811	3800652	2160	11	GCT	A	GAT	D	2-acyl-glycerophospho-ethanolamine acyltransferase/acyl-acyl-carrier protein synthetase	transversion
CP001164	3804600	NSYN	1	T	T	T	T	T	T	T	T	T	T	T	G	ECH74115_4107	3805697	3804435	1263	1098	TGC	C	TGG	W	diaminopimelate decarboxylase	transversion
CP001164	3805319	SYN	1	A	A	A	A	A	A	A	A	A	A	A	G	ECH74115_4107	3805697	3804435	1263	379	GAA	E	GAA	E	diaminopimelate decarboxylase	transition
CP001164	3806751	SYN	1	A	A	A	A	A	A	A	A	A	A	T	A	ECH74115_4109	3805819	3806755	936	933	GCA	A	GCT	A	transcriptional activator protein LysR	transversion
CP001164	3808677	NSYN	1	T	C	C	C	C	C	C	C	C	T	C	C	ECH74115_4110	3808980	3807562	1419	304	ACT	T	CCT	P	arabinose-proton symporter	transition
CP001164	3811162	intergenic	1	A	G	G	G	G	G	G	A	A	A	A	A	intergenic	--	--	--	--	--	--			intergenic	transition
CP001164	3812049	SYN	1	G	G	G	G	G	G	T	G	G	G	G	G	ECH74115_4113	3812390	3811209	1182	342	GCC	A	GCT	A	acetyl-CoA acetyltransferase	transversion
CP001164	3812145	SYN	1	G	G	G	G	G	G	G	T	G	G	G	G	ECH74115_4113	3812390	3811209	1182	246	GAT	D	GAT	D	acetyl-CoA acetyltransferase	transversion
CP001164	3813891	intergenic	1	T	T	T	T	T	T	T	T	T	T	C	T	intergenic	--	--	--	--	--	--			intergenic	transition
CP001164	3814454	NSYN	1	A	A	A	A	A	A	A	A	A	A	A	T	ECH74115_4115	3814397	3814967	570	58	ACC	T	TCC	S	conserved hypothetical protein	transversion
CP001164	3815139	intergenic	1	A	G	G	G	G	G	G	G	G	A	G	G	intergenic	--	--	--	--	--	--			intergenic	transition
CP001164	3815584	SYN	1	A	A	A	A	A	A	A	A	A	A	C	C	ECH74115_4116	3815300	3816110	810	285	ACA	T	ACC	T	transcriptional regulatory protein	transversion
CP001164	3815869	SYN	1	G	G	G	G	G	G	G	G	A	G	G	G	ECH74115_4116	3815300	3816110	810	570	GCG	A	GCA	A	transcriptional regulatory protein	transition
CP001164	3816605	intergenic	1	A	A	A	A	A	A	A	A	T	A	A	A	intergenic	--	--	--	--	--	--			intergenic	transversion
CP001164	3818843	intergenic	1	C	C	C	C	C	C	C	C	C	C	C	A	intergenic	--	--	--	--	--	--			intergenic	transversion
CP001164	3820245	NSYN	1	C	C	C	C	C	C	C	T	C	C	C	C	ECH74115_4123	3819131	3820508	1377	1115	GCC	A	GTC	V	transcriptional regulatory protein	transition
CP001164	3820440	NSYN	1	G	G	G	G	G	G	G	G	G	G	G	A	ECH74115_4123	3819131	3820508	1377	1310	GGA	G	GAA	E	transcriptional regulatory protein	transition
CP001164	3820520	intergenic	1	A	A	A	A	A	A	A	A	A	A	A	G	intergenic	--	--	--	--	--	--			intergenic	transition
CP001164	3820560	intergenic	1	A	A	A	A	A	A	A	A	A	A	A	C	intergenic	--	--	--	--	--	--			intergenic	transversion
CP001164	3820789	NSYN	1	T	T	T	T	T	T	T	T	T	T	T	A	ECH74115_4124	3820674	3820893	219	116	GTT	V	GAT	D	conserved hypothetical protein	transversion
CP001164	3821438	SYN	1	C	C	C	T	C	C	C	C	C	C	C	C	ECH74115_4125	3820977	3821481	504	462	ACC	T	ACT	T	lytic transglycosylase PilT	transition
CP001164	3822054	SYN	1	A	A	A	A	A	A	A	A	A	A	C	A	ECH74115_4126	3822131	3821499	633	78	ATA	I	ATC	I	transcriptional regulator, LuxR family	transversion
CP001164	3822205	NSYN	1	T	T	T	T	T	T	T	T	T	T	T	C	ECH74115_4127	3822277	3822110	168	73	AAT	N	CAT	H	hypothetical protein	transition
CP001164	3822262	SYN	1	A	G	G	G	G	G	G	G	G	A	G	G	ECH74115_4127	3822277	3822110	168	16	GCA	A	GCA	A	hypothetical protein	transition
CP001164	3822264	SYN	1	G	G	G	G	G	G	G	G	G	G	A	G	ECH74115_4127	3822277	3822110	168	14	TGA	*	TAA	*	hypothetical protein	transition
CP001164	3828034	NSYN	1	T	T	T	T	T	T	T	T	T	T	T	C	ECH74115_4137	3828353	3827232	1122	320	TTC	F	TCC	S	conserved hypothetical protein	transition
CP001164	3828295	NSYN	1	C	C	C	C	C	C	C	C	C	C	T	C	ECH74115_4137	3828353	3827232	1122	59	CCC	P	CTC	L	conserved hypothetical protein	transition
CP001164	3833479	NSYN	1	T	T	T	T	T	T	T	T	T	T	T	A	ECH74115_4146	3833596	3832304	1293	118	CCT	P	ACT	T	flagellum-specific ATP synthase	transversion
CP001164	3833600	intergenic	1	A	A	A	A	A	A	T	A	A	A	A	A	intergenic	--	--	--	--	--	--			intergenic	transversion
CP001164	3836712	SYN	1	T	T	T	T	T	T	T	T	T	T	T	C	ECH74115_4148	3836826	3835681	1146	115	CCT	P	CCT	P	EivE	transition
CP001164	3837151	NSYN	1	C	C	C	C	C	C	C	C	T	C	C	C	ECH74115_4149	3838534	3836831	1704	1384	CAC	H	TAC	Y	type III secretion outer membrane pore, YscC/HrcC family	transition
CP001164	3838792	SYN	1	C	A	A	A	A	A	C	C	C	C	C	C	ECH74115_4150	3839280	3838531	750	489	CTG	L	CTA	L	EivF	transversion
CP001164	3839958	intergenic	1	T	T	T	T	T	T	T	T	C	T	T	T	intergenic	--	--	--	--	--	--			intergenic	transition
CP001164	3840815	intergenic	1	A	A	A	A	A	A	A	A	T	A	A	A	intergenic	--	--	--	--	--	--			intergenic	transversion
CP001164	3840855	intergenic	1	G	G	G	G	G	G	G	G	A	G	G	G	intergenic	--	--	--	--	--	--			intergenic	transition
CP001164	3842511	SYN	1	C	C	C	C	C	C	C	C	C	C	T	C	ECH74115_4155	3842618	3841863	756	108	CGT	R	CGT	R	peptidase, M23B family	transition
CP001164	3842874	intergenic	1	A	A	A	A	A	A	A	A	A	A	C	A	intergenic	--	--	--	--	--	--			intergenic	transversion
CP001164	3843096	NSYN	1	G	G	G	G	G	G	G	C	G	G	G	G	ECH74115_4156	3843034	3845332	2298	63	AAG	K	AAC	N	xanthine dehydrogenase	transversion
CP001164	3843763	NSYN	1	C	A	A	A	A	A	A	A	A	C	C	C	ECH74115_4156	3843034	3845332	2298	730	CCA	P	ACA	T	xanthine dehydrogenase	transversion
CP001164	3848396	NSYN	1	T	T	T	T	T	T	T	T	T	T	T	C	ECH74115_4159	3848514	3846736	1779	119	ATA	I	ACA	T	sigma-54 dependent transcriptional regulator, Fis family	transition
CP001164	3849133	SYN	0.5	G	A	G	G	G	G	G	G	G	G	G	G	ECH74115_4160	3848990	3850181	1191	144	CTG	L	CTA	L	aspartate/ornithine carbamoyltransferase family protein	transition
CP001164	3849212	NSYN	1	C	C	C	C	C	C	C	A	C	C	C	C	ECH74115_4160	3848990	3850181	1191	223	CGC	R	AGC	S	aspartate/ornithine carbamoyltransferase family protein	transversion
CP001164	3849991	SYN	1	T	T	T	T	T	T	T	T	T	T	C	T	ECH74115_4160	3848990	3850181	1191	1002	GAT	D	GAC	D	aspartate/ornithine carbamoyltransferase family protein	transition
CP001164	3855671	NSYN	1	T	T	T	T	T	T	T	T	T	T	T	G	ECH74115_4165	3856787	3855162	1626	1117	ATT	I	GTT	V	putative xanthine dehydrogenase accessory factor	transversion
CP001164	3856285	NSYN	1	T	T	T	T	T	T	T	T	G	T	T	T	ECH74115_4165	3856787	3855162	1626	503	ATC	I	AGC	S	putative xanthine dehydrogenase accessory factor	transversion
CP001164	3857230	SYN	1	G	A	A	G	G	G	G	G	G	G	G	G	ECH74115_4166	3857605	3856835	771	376	ACG	T	ACG	T	conserved hypothetical protein	transition
CP001164	3859561	SYN	1	T	T	T	T	T	T	T	T	A	T	T	T	ECH74115_4168	3858608	3861707	3099	954	ACT	T	ACA	T	putative selenate reductase	transversion
CP001164	3861910	NSYN	1	G	G	G	G	G	G	G	G	A	G	G	G	ECH74115_4169	3861709	3863038	1329	202	GGG	G	AGG	R	amidohydrolase family protein SsnA	transition
CP001164	3868173	NSYN	1	G	G	G	G	G	G	A	G	G	G	G	G	ECH74115_4172	3866898	3868299	1401	1276	GTA	V	ATA	I	xanthine/uracil permease family protein	transition
CP001164	3868367	NSYN	1	G	A	A	A	A	A	A	A	A	G	A	A	ECH74115_4173	3868316	3869633	1317	52	GCC	A	ACC	T	guanine deaminase	transition
CP001164	3869716	NSYN	1	G	G	G	G	G	G	C	G	G	G	G	G	ECH74115_4174	3869668	3871036	1368	49	GCG	A	CCG	P	inorganic anion transporter, sulfate permease (SulP) family	transversion
CP001164	3873018	NSYN	1	G	G	G	G	G	G	G	A	G	G	G	G	ECH74115_4176	3873484	3871559	1926	467	TGC	C	TAC	Y	glutamate synthase, small subunit	transition
CP001164	3873019	SYN	1	C	C	C	C	C	C	C	C	C	C	T	C	ECH74115_4176	3873484	3871559	1926	466	TGC	C	TGC	C	glutamate synthase, small subunit	transition
CP001164	3873918	NSYN	1	G	G	G	G	G	G	G	G	G	G	G	A	ECH74115_4177	3873785	3875363	1578	134	AGC	S	AAC	N	putative xanthine permease	transition
CP001164	3874323	NSYN	1	A	A	A	A	A	A	A	A	A	A	A	C	ECH74115_4177	3873785	3875363	1578	539	CAA	Q	CCA	P	putative xanthine permease	transversion
CP001164	3875544	intergenic	1	G	A	A	A	A	A	A	A	A	G	A	A	intergenic	--	--	--	--	--	--			intergenic	transition
CP001164	3878465	intergenic	1	G	G	G	G	G	G	G	G	A	G	G	G	intergenic	--	--	--	--	--	--			intergenic	transition
CP001164	3881621	NSYN	1	G	T	T	T	T	T	T	G	G	G	G	G	ECH74115_4185	3882289	3881393	897	669	GAA	E	GAT	D	tyrosine recombinase XerD	transversion
CP001164	3882649	SYN	1	G	G	A	G	G	G	G	G	G	G	G	G	ECH74115_4186	3882401	3882923	522	249	GCG	A	GCA	A	flavodoxin	transition
CP001164	3882903	NSYN	1	T	T	T	T	T	T	T	T	T	T	G	T	ECH74115_4186	3882401	3882923	522	503	ATG	M	AGG	R	flavodoxin	transversion
CP001164	3887908	NSYN	1	G	G	G	G	G	G	C	G	G	G	G	G	ECH74115_4194	3890567	3887694	2874	2660	GGC	G	GCC	A	glycine dehydrogenase	transversion
CP001164	3889481	NSYN	1	G	G	G	G	G	G	G	G	A	G	G	G	ECH74115_4194	3890567	3887694	2874	1087	GCG	A	ACG	T	glycine dehydrogenase	transition
CP001164	3891552	NSYN	1	C	C	C	C	C	C	C	C	C	C	C	G	ECH74115_4196	3892192	3891098	1095	641	CCC	P	CGC	R	glycine cleavage system T protein	transversion
CP001164	3891732	NSYN	1	G	G	G	G	G	G	G	G	A	G	G	G	ECH74115_4196	3892192	3891098	1095	461	TGC	C	TAC	Y	glycine cleavage system T protein	transition
CP001164	3892417	NSYN	1	G	G	G	G	G	G	G	G	G	G	G	A	ECH74115_4197	3892496	3892368	129	80	AGT	S	AAT	N	putative membrane protein	transition
CP001164	3893375	SYN	1	C	A	A	A	A	A	A	C	C	C	C	C	ECH74115_4199	3893842	3892640	1203	468	CGT	R	CGA	R	ubiquinone biosynthesis hydroxylase, UbiH/UbiF/VisC/COQ6 family	transversion
CP001164	3894834	NSYN	1	G	C	C	C	C	C	C	C	C	G	C	C	ECH74115_4200	3895044	3893866	1179	211	ATG	M	CTG	L	2-octaprenyl-6-methoxyphenol hydroxylase	transversion
CP001164	3899414	NSYN	1	G	G	G	G	G	G	G	G	G	G	G	A	ECH74115_4208	3900329	3899097	1233	916	CAG	Q	AAG	K	phosphoglycerate dehydrogenase	transition
CP001164	3900508	intergenic	1	T	T	T	T	T	T	T	T	T	T	T	G	intergenic	--	--	--	--	--	--			intergenic	transversion
CP001164	3901468	intergenic	1	T	T	T	T	T	T	T	T	T	T	T	C	intergenic	--	--	--	--	--	--			intergenic	transition
CP001164	3903104	NSYN	1	A	A	A	A	A	A	A	A	A	A	A	G	ECH74115_4213	3902723	3904868	2145	382	ACG	T	GCG	A	methylmalonyl-CoA mutase	transition
CP001164	3903845	NSYN	1	A	A	A	A	A	A	A	A	A	A	A	C	ECH74115_4213	3902723	3904868	2145	1123	ACC	T	CCC	P	methylmalonyl-CoA mutase	transversion
CP001164	3904503	NSYN	1	T	T	T	T	T	T	T	T	T	T	T	A	ECH74115_4213	3902723	3904868	2145	1781	CTG	L	CAG	Q	methylmalonyl-CoA mutase	transversion
CP001164	3905034	NSYN	1	G	A	G	G	G	G	G	G	G	G	G	G	ECH74115_4214	3904860	3905856	996	175	GTT	V	ATT	I	LAO/AO transport system ATPase	transition
CP001164	3906480	SYN	1	C	C	C	C	C	C	C	T	C	C	C	C	ECH74115_4215	3905866	3906652	786	615	GCC	A	GCT	A	methylmalonyl-CoA decarboxylase	transition
CP001164	3907029	NSYN	1	T	T	T	T	T	T	T	T	T	T	C	T	ECH74115_4217	3906675	3908154	1479	355	TTC	F	CTC	L	acetyl-CoA hydrolase/transferase	transition
CP001164	3909995	intergenic	1	T	T	T	T	T	T	T	T	T	T	T	C	intergenic	--	--	--	--	--	--			intergenic	transition
CP001164	3920423	SYN	1	C	C	C	C	C	C	C	A	C	C	C	C	ECH74115_4232	3921190	3920225	966	768	CTT	L	CTA	L	fructose-1,6-bisphosphatase, class II	transversion
CP001164	3921797	NSYN	1	G	G	G	G	G	G	G	G	G	G	G	A	ECH74115_4233	3922464	3921187	1278	668	CGG	R	CAG	Q	L-sorbose 1-phosphate reductase	transition
CP001164	3923527	NSYN	1	T	T	T	T	T	T	T	T	T	T	T	G	ECH74115_4234	3923867	3922479	1389	341	ATA	I	AGA	R	PTS system, mannitol-specific cryptic EIICB component	transversion
CP001164	3925330	NSYN	1	G	A	A	A	A	A	A	G	G	G	G	G	ECH74115_4237	3926643	3924652	1992	1314	GAC	D	GAA	E	transketolase	transition
CP001164	3928746	NSYN	1	C	C	C	C	C	C	C	C	C	C	C	T	ECH74115_4239	3928805	3927885	921	60	CAA	Q	CAT	H	agmatinase	transition
CP001164	3934078	intergenic	1	A	A	A	A	A	A	A	A	A	A	A	G	intergenic	--	--	--	--	--	--			intergenic	transition
CP001164	3934632	SYN	1	A	A	A	A	A	A	A	A	A	A	A	T	ECH74115_4246	3934180	3935575	1395	453	ACA	T	ACT	T	galactose-proton symporter	transversion
CP001164	3935801	NSYN	1	T	T	T	T	T	T	T	T	A	T	T	T	ECH74115_4247	3935597	3936149	552	205	TGG	W	AGG	R	protein SprT	transversion
CP001164	3935878	SYN	1	A	A	A	A	A	A	A	A	A	A	A	G	ECH74115_4247	3935597	3936149	552	282	GTA	V	GTG	V	protein SprT	transition
CP001164	3936038	NSYN	1	A	A	A	A	A	A	A	A	A	A	A	C	ECH74115_4247	3935597	3936149	552	442	AGC	S	CGC	R	protein SprT	transversion
CP001164	3940132	SYN	1	A	G	G	G	G	G	G	G	G	A	G	G	ECH74115_4253	3941028	3940003	1026	897	AGG	R	AGG	R	twitching motility family protein	transition
CP001164	3942842	NSYN	1	T	C	C	C	C	C	C	C	C	T	C	C	ECH74115_4257	3942584	3943178	594	259	TGT	C	CGT	R	non-canonical purine NTP pyrophosphatase, RdgB/HAM1 family	transition
CP001164	3944611	NSYN	1	G	G	G	G	G	G	A	G	G	G	G	G	ECH74115_4259	3945556	3944549	1008	946	CTG	L	ATG	M	conserved hypothetical protein	transition
CP001164	3945075	NSYN	1	A	G	G	G	G	G	G	G	G	A	G	G	ECH74115_4259	3945556	3944549	1008	482	GAT	D	GGT	G	conserved hypothetical protein	transition
CP001164	3945190	SYN	1	C	T	T	T	T	T	C	C	C	C	C	C	ECH74115_4259	3945556	3944549	1008	367	TGC	C	TGC	C	conserved hypothetical protein	transition
CP001164	3945228	NSYN	1	G	G	G	G	G	G	G	G	G	G	T	G	ECH74115_4259	3945556	3944549	1008	329	CGC	R	CTC	L	conserved hypothetical protein	transversion
CP001164	3948681	NSYN	1	C	C	C	C	C	C	C	T	C	C	C	C	ECH74115_4264	3948843	3948124	720	163	ATC	I	TTC	F	tRNA (guanine-N(7)-)-methyltransferase	transition
CP001164	3954383	NSYN	1	T	T	T	T	T	T	T	T	T	T	T	A	ECH74115_4269	3955146	3953011	2136	764	CTC	L	CAC	H	ornithine decarboxylase, constitutive	transversion
CP001164	3956192	NSYN	1	C	C	C	C	C	C	C	C	C	C	T	C	ECH74115_4270	3955544	3956252	708	649	CTT	L	TTT	F	putative membrane protein	transition
CP001164	3959945	intergenic	1	A	A	A	A	A	A	A	A	A	A	A	G	intergenic	--	--	--	--	--	--			intergenic	transition
[truncated: 892 more rows]

## Sheet: ST4-2 cgMLST
I. cgMLST loci in E. coli MG1655
MG1655 position	Gene	Gene length [bp]	Product	Protein_id	Ref.-Seq. (U00096)	Variants	Effect to Ref.-Seq.	AA Number	Ref.-Seq. AA (U00096)	Variants AA
2889	thrB	933	homoserine kinase	AAC73114.1	C	C (10)/T (1)	some non-synonymous	30	A	A (10)/V (1)
3118	thrB	933	homoserine kinase	AAC73114.1	G	T (10)/G (1)	all synonymous	106	A	A (11)
6048	yaaA	777	peroxide resistance protein, lowers intracellular iron	AAC73117.1	C	C (10)/T (1)	some non-synonymous	138	A	A (10)/T (1)
6657	yaaJ	1431	putative transporter	AAC73118.1	G	G (10)/A (1)	some non-synonymous	435	H	H (10)/Y (1)
10822	yaaW	714	conserved protein, UPF0174 family	AAC73122.1	T	T (10)/G (1)	some non-synonymous	179	T	T (10)/P (1)
14300	dnaJ	1131	chaperone Hsp40, co-chaperone with DnaK	AAC73126.1	G	G (10)/A (1)	some non-synonymous	45	A	A (10)/T (1)
18945	nhaR	906	DNA-binding transcriptional activator	AAC73131.1	C	T (10)/C (1)	all synonymous	77	F	F (11)
19025	nhaR	906	DNA-binding transcriptional activator	AAC73131.1	C	T (10)/C (1)	some non-synonymous	104	A	V (10)/A (1)
21922	ribF	942	bifunctional riboflavin kinase/FAD synthetase	AAC73136.1	C	C (10)/T (1)	all synonymous	172	A	A (11)
24940	ileS	2817	isoleucyl-tRNA synthetase	AAC73137.1	G	G (10)/A (1)	all synonymous	850	A	A (11)
26817	ispH	951	4-hydroxy-3-methylbut-2-enyl diphosphate reductase, 4Fe-4S protein	AAC73140.1	C	C (10)/T (1)	all synonymous	181	L	L (11)
30389	carA	1149	carbamoyl phosphate synthetase small subunit, glutamine amidotransferase	AAC73143.1	C	C (10)/T (1)	some non-synonymous	247	P	P (10)/S (1)
35493	caiD	786	carnitinyl-CoA dehydratase	AAC73147.2	G	T (9)/G (2)	some non-synonymous	224	R	S (9)/R (2)
36646	caiC	1554	putative crotonobetaine/carnitine-CoA ligase	AAC73148.2	C	C (10)/A (1)	all synonymous	393	V	V (11)
36701	caiC	1554	putative crotonobetaine/carnitine-CoA ligase	AAC73148.2	G	G (10)/A (1)	some non-synonymous	375	P	P (10)/L (1)
36775	caiC	1554	putative crotonobetaine/carnitine-CoA ligase	AAC73148.2	T	G (10)/T (1)	some non-synonymous	350	E	D (10)/E (1)
37799	caiC	1554	putative crotonobetaine/carnitine-CoA ligase	AAC73148.2	A	A (10)/G (1)	some non-synonymous	9	L	L (10)/P (1)
38728	caiB	1218	crotonobetainyl CoA:carnitine CoA transferase	AAC73149.1	C	C (10)/T (1)	some non-synonymous	130	G	G (10)/S (1)
39679	caiA	1143	crotonobetaine reductase subunit II, FAD-binding	AAC73150.1	C	C (10)/T (1)	all synonymous	236	E	E (11)
43090	fixA	771	putative electron transfer flavoprotein subunit, required for anaerobic carnitine reduction	AAC73152.2	C	C (10)/T (1)	some non-synonymous	230	R	R (10)/C (1)
43859	fixB	942	putative electron transfer flavoprotein, NAD/FAD-binding domain and ETFP adenine nucleotide-binding domain-like protein	AAC73153.1	G	A (8)/G (3)	all synonymous	224	E	E (11)
43958	fixB	942	putative electron transfer flavoprotein, NAD/FAD-binding domain and ETFP adenine nucleotide-binding domain-like protein	AAC73153.1	G	G (10)/A (1)	all synonymous	257	L	L (11)
44717	fixC	1287	putative oxidoreductase with FAD/NAD(P)-binding domain	AAC73154.1	G	A (10)/G (1)	some non-synonymous	180	D	N (10)/D (1)
46462	yaaU	1332	putative transporter	AAC73156.1	A	A (10)/G (1)	some non-synonymous	219	E	E (10)/G (1)
46829	yaaU	1332	putative transporter	AAC73156.1	T	T (10)/A (1)	some non-synonymous	341	F	F (10)/L (1)
47794	kefC	1863	potassium:proton antiporter	AAC73158.1	C	C (10)/T (1)	some non-synonymous	9	A	A (10)/V (1)
48038	kefC	1863	potassium:proton antiporter	AAC73158.1	C	C (10)/T (1)	all synonymous	90	G	G (11)
49301	kefC	1863	potassium:proton antiporter	AAC73158.1	T	C (6)/T (5)	all synonymous	511	V	V (11)
53737	surA	1287	peptidyl-prolyl cis-trans isomerase (PPIase)	AAC73164.1	A	A (10)/G (1)	all synonymous	322	A	A (11)
54281	surA	1287	peptidyl-prolyl cis-trans isomerase (PPIase)	AAC73164.1	A	A (10)/G (1)	some non-synonymous	141	V	V (10)/A (1)
56941	lptD	2355	LPS assembly OM complex LptDE, beta-barrel component	AAC73165.1	C	T (10)/C (1)	some non-synonymous	57	D	N (10)/D (1)
58152	djlA	816	DnaJ-like protein, membrane anchored	AAC73166.1	G	G (6)/T (5)	all synonymous	263	L	L (11)
59811	rluA	660	dual specificity 23S rRNA pseudouridine(746), tRNA pseudouridine(32) synthase, SAM-dependent	AAC73169.1	C	C (10)/T (1)	some non-synonymous	179	R	R (10)/H (1)
64047	polB	2352	DNA polymerase II	AAC73171.1	C	T (10)/C (1)	all synonymous	578	A	A (11)
65751	polB	2352	DNA polymerase II	AAC73171.1	T	T (10)/C (1)	all synonymous	10	R	R (11)
65933	araD	696	L-ribulose-5-phosphate 4-epimerase	AAC73172.1	C	C (10)/T (1)	all synonymous	206	Q	Q (11)
66263	araD	696	L-ribulose-5-phosphate 4-epimerase	AAC73172.1	C	C (10)/T (1)	all synonymous	96	T	T (11)
72954	thiP	1611	fused thiamin transporter subunits of ABC superfamily: membrane components	AAC73178.1	G	C (10)/G (1)	some non-synonymous	523	T	S (10)/T (1)
79701	leuC	1401	3-isopropylmalate dehydratase large subunit	AAC73183.1	C	T (9)/C (2)	all synonymous	388	A	A (11)
80805	leuC	1401	3-isopropylmalate dehydratase large subunit	AAC73183.1	G	G (10)/A (1)	all synonymous	20	N	N (11)
87549	ilvH	492	acetolactate synthase III, thiamin-dependent, small subunit	AAC73189.1	C	T (10)/C (1)	some non-synonymous	65	H	Y (10)/H (1)
90314	rsmH	942	16S rRNA m(4)C1402 methyltransferase, SAM-dependent	AAC73193.1	T	T (10)/C (1)	some non-synonymous	74	I	I (10)/T (1)
91801	ftsI	1767	transpeptidase involved in septal peptidoglycan synthesis (penicillin-binding protein 3)	AAC73195.1	C	C (10)/T (1)	some non-synonymous	130	A	A (10)/V (1)
95586	murF	1359	UDP-N-acetylmuramoyl-tripeptide:D-alanyl-D- alanine ligase	AAC73197.1	G	G (10)/A (1)	some non-synonymous	313	V	V (10)/I (1)
97876	murD	1317	UDP-N-acetylmuramoyl-L-alanine:D-glutamate ligase	AAC73199.1	C	C (10)/T (1)	some non-synonymous	264	L	L (10)/F (1)
100056	murG	1068	N-acetylglucosaminyl transferase	AAC73201.1	C	C (10)/T (1)	some non-synonymous	138	A	A (10)/V (1)
113494	guaC	1044	GMP reductase	AAC73215.1	C	C (10)/T (1)	all synonymous	17	R	R (11)
115778	hofB	1386	conserved protein with nucleoside triphosphate hydrolase domain	AAC73218.1	A	A (10)/G (1)	some non-synonymous	441	V	V (10)/A (1)
116562	hofB	1386	conserved protein with nucleoside triphosphate hydrolase domain	AAC73218.1	C	C (10)/T (1)	some non-synonymous	180	V	V (10)/M (1)
120823	aroP	1374	aromatic amino acid transporter	AAC73223.1	G	G (10)/A (1)	all synonymous	243	Y	Y (11)
125996	aceF	1893	pyruvate dehydrogenase, dihydrolipoyltransacetylase component E2	AAC73226.1	C	A (9)/C (2)	some non-synonymous	101	A	E (9)/A (2)
132503	acnB	2598	bifunctional aconitate hydratase 2/2-methylisocitrate dehydratase	AAC73229.1	G	G (9)/A (2)	some non-synonymous	297	D	D (9)/N (2)
132611	acnB	2598	bifunctional aconitate hydratase 2/2-methylisocitrate dehydratase	AAC73229.1	G	G (10)/A (1)	some non-synonymous	333	D	D (10)/N (1)
133351	acnB	2598	bifunctional aconitate hydratase 2/2-methylisocitrate dehydratase	AAC73229.1	G	A (10)/G (1)	all synonymous	579	L	L (11)
133402	acnB	2598	bifunctional aconitate hydratase 2/2-methylisocitrate dehydratase	AAC73229.1	C	C (10)/A (1)	all synonymous	596	T	T (11)
137688	cueO	1551	multicopper oxidase (laccase)	AAC73234.1	G	G (10)/T (1)	all synonymous	202	V	V (11)
138212	cueO	1551	multicopper oxidase (laccase)	AAC73234.1	C	C (6)/T (5)	some non-synonymous	377	A	A (6)/V (5)
138507	cueO	1551	multicopper oxidase (laccase)	AAC73234.1	A	C (6)/A (5)	all synonymous	475	V	V (11)
138563	cueO	1551	multicopper oxidase (laccase)	AAC73234.1	A	G (10)/A (1)	some non-synonymous	494	H	R (10)/H (1)
141850	hpt	537	hypoxanthine phosphoribosyltransferase	AAC73236.2	G	G (10)/T (1)	all synonymous	140	P	P (11)
149579[+1]	panB	795	3-methyl-2-oxobutanoate hydroxymethyltransferase	AAC73245.1	-	G (10)/- (1)	some non-synonymous	8	L	S (10)/? (1)
149579	panB	795	3-methyl-2-oxobutanoate hydroxymethyltransferase	AAC73245.1	A	A (10)/G (1)	some non-synonymous	8	L	L (10)/S (1)
149581	panB	795	3-methyl-2-oxobutanoate hydroxymethyltransferase	AAC73245.1	G	G (10)/A (1)	all synonymous	7	S	S (11)
149582	panB	795	3-methyl-2-oxobutanoate hydroxymethyltransferase	AAC73245.1	G	C (10)/G (1)	some non-synonymous	7	S	C (10)/S (1)
149584	panB	795	3-methyl-2-oxobutanoate hydroxymethyltransferase	AAC73245.1	G	- (10)/A (1)	some non-synonymous	6	I	I (1)/? (10)
161514	ligT	531	2'-5' RNA ligase	AAC73258.2	G	A (10)/G (1)	some non-synonymous	173	A	V (10)/A (1)
167593	fhuA	2244	ferrichrome outer membrane transporter	AAC73261.1	C	T (6)/C (5)	some non-synonymous	37	P	L (6)/P (5)
172712	fhuB	1983	fused iron-hydroxamate transporter subunits of ABC superfamily: membrane components	AAC73264.1	C	C (10)/T (1)	all synonymous	417	N	N (11)
174166	hemL	1281	glutamate-1-semialdehyde aminotransferase (aminomutase)	AAC73265.1	C	T (10)/C (1)	all synonymous	239	V	V (11)
175421	clcA	1422	H(+)/Cl(-) exchange transporter	AAC73266.1	T	G (10)/- (1)	some non-synonymous	105	G	G (10)/? (1)
175961	clcA	1422	H(+)/Cl(-) exchange transporter	AAC73266.1	C	C (6)/T (5)	all synonymous	285	G	G (11)
177374	yadS	624	inner membrane protein, UPF0126 family	AAC73268.1	C	T (10)/C (1)	some non-synonymous	84	R	H (10)/R (1)
178131	btuF	801	vitamin B12 transporter subunit: periplasmic-binding component of ABC superfamily	AAC73269.1	C	T (10)/C (1)	some non-synonymous	111	S	N (10)/S (1)
180518	dgt	1518	deoxyguanosine triphosphate triphosphohydrolase	AAC73271.1	C	T (8)/C (3)	all synonymous	428	L	L (11)
181911	degP	1425	serine endoprotease (protease Do), membrane-associated	AAC73272.1	C	C (10)/T (1)	some non-synonymous	343	P	P (10)/L (1)
187090	glnD	2673	uridylyltransferase	AAC73278.1	C	C (10)/T (1)	some non-synonymous	521	G	G (10)/S (1)
189957	rpsB	726	30S ribosomal subunit protein S2	AAC73280.1	G	G (10)/A (1)	all synonymous	28	K	K (11)
203028	lpxA	789	UDP-N-acetylglucosamine acetyltransferase	AAC73292.1	A	G (10)/A (1)	some non-synonymous	157	T	A (10)/T (1)
203506	lpxB	1149	tetraacyldisaccharide-1-P synthase	AAC73293.1	C	C (10)/T (1)	all synonymous	53	A	A (11)
204397	lpxB	1149	tetraacyldisaccharide-1-P synthase	AAC73293.1	C	C (10)/T (1)	all synonymous	350	T	T (11)
205199	dnaE	3483	DNA polymerase III alpha subunit	AAC73295.1	C	C (10)/T (1)	some non-synonymous	25	A	A (10)/V (1)
206226	dnaE	3483	DNA polymerase III alpha subunit	AAC73295.1	T	T (10)/G (1)	all synonymous	367	G	G (11)
209816	ldcC	2142	lysine decarboxylase 2, constitutive	AAC73297.1	C	C (10)/T (1)	all synonymous	46	I	I (11)
214747	yaeQ	546	hypothetical protein	AAC73301.1	C	C (6)/T (5)	some non-synonymous	153	Q	Q (6)/* (5)
219847	rcsF	405	putative outer membrane protein, signal	AAC73307.1	C	C (10)/T (1)	some non-synonymous	50	R	R (10)/Q (1)
219945	rcsF	405	putative outer membrane protein, signal	AAC73307.1	G	G (10)/A (1)	all synonymous	17	S	S (11)
223174	gmhB	576	D,D-heptose 1,7-bisphosphate phosphatase	AAC73311.1	G	G (10)/A (1)	all synonymous	114	P	P (11)
229802	dkgB	804	2,5-diketo-D-gluconate reductase B	AAC73312.1	G	G (10)/- (1)	some non-synonymous	212	M	M (10)/? (1)
231700	yafD	801	hypothetical protein	AAC73314.1	C	T (10)/C (1)	all synonymous	193	A	A (11)
234072	gloB	756	hydroxyacylglutathione hydrolase	AAC73317.1	A	A (10)/T (1)	all synonymous	237	P	P (11)
234945	yafS	723	putative S-adenosyl-L-methionine-dependent methyltransferase	AAC73318.2	C	T (10)/C (1)	some non-synonymous	44	H	Y (10)/H (1)
242282	fadE	2445	acyl coenzyme A dehydrogenase	AAC73325.2	C	A (10)/C (1)	some non-synonymous	341	R	L (10)/R (1)
246887	yafL	750	putative lipoprotein and C40 family peptidase	AAC73331.1	A	A (10)/T (1)	some non-synonymous	59	Q	Q (10)/L (1)
246984	yafL	750	putative lipoprotein and C40 family peptidase	AAC73331.1	T	A (10)/G (1)	all synonymous	91	A	A (11)
247173	yafL	750	putative lipoprotein and C40 family peptidase	AAC73331.1	C	C (10)/T (1)	all synonymous	154	A	A (11)
251324	dinB	1056	DNA polymerase IV	AAC73335.1	G	G (6)/A (5)	some non-synonymous	143	A	A (6)/T (5)
251865	dinB	1056	DNA polymerase IV	AAC73335.1	G	G (10)/T (1)	some non-synonymous	323	R	R (10)/L (1)
253137	yafP	453	putative acyltransferase with acyl-CoA N-acyltransferase domain	AAC73338.1	T	T (10)/A (1)	some non-synonymous	143	Y	Y (10)/* (1)
254968	pepD	1458	aminoacyl-histidine dipeptidase (peptidase D)	AAC73341.1	T	T (10)/G (1)	some non-synonymous	250	N	N (10)/T (1)
257033	frsA	1245	fermentation-respiration switch protein; PTS Enzyme IIA(Glc)-binding protein; pNP-butyrate esterase activity	AAC73343.1	G	A (10)/G (1)	all synonymous	169	R	R (11)
258201	crl	402	sigma factor-binding protein, stimulates RNA polymerase holoenzyme formation	AAC73344.1	C	C (10)/A (1)	some non-synonymous	125	R	R (10)/S (1)
258405	phoE	1056	outer membrane phosphoporin protein E	AAC73345.1	T	T (10)/C (1)	some non-synonymous	307	D	D (10)/G (1)
258797	phoE	1056	outer membrane phosphoporin protein E	AAC73345.1	G	G (10)/- (1)	some non-synonymous	176	N	N (10)/? (1)
258798	phoE	1056	outer membrane phosphoporin protein E	AAC73345.1	T	T (10)/- (1)	some non-synonymous	176	N	N (10)/? (1)
258799	phoE	1056	outer membrane phosphoporin protein E	AAC73345.1	T	T (10)/- (1)	some non-synonymous	176	N	N (10)/? (1)
258800	phoE	1056	outer membrane phosphoporin protein E	AAC73345.1	T	T (10)/- (1)	some non-synonymous	175	K	K (10)/? (1)
258801	phoE	1056	outer membrane phosphoporin protein E	AAC73345.1	T	T (10)/- (1)	some non-synonymous	175	K	K (10)/? (1)
258802	phoE	1056	outer membrane phosphoporin protein E	AAC73345.1	T	T (10)/- (1)	some non-synonymous	175	K	K (10)/? (1)
258803	phoE	1056	outer membrane phosphoporin protein E	AAC73345.1	C	C (10)/- (1)	some non-synonymous	174	G	G (10)/? (1)
258804	phoE	1056	outer membrane phosphoporin protein E	AAC73345.1	C	C (10)/- (1)	some non-synonymous	174	G	G (10)/? (1)
258805	phoE	1056	outer membrane phosphoporin protein E	AAC73345.1	C	C (10)/- (1)	some non-synonymous	174	G	G (10)/? (1)
258806	phoE	1056	outer membrane phosphoporin protein E	AAC73345.1	T	T (10)/- (1)	some non-synonymous	173	Q	Q (10)/? (1)
258807	phoE	1056	outer membrane phosphoporin protein E	AAC73345.1	T	T (10)/- (1)	some non-synonymous	173	Q	Q (10)/? (1)
297092	paoD	957	moco insertion factor for PaoABC aldehyde oxidoreductase	AAC73386.1	C	C (10)/A (1)	some non-synonymous	287	A	A (10)/S (1)
297826	paoD	957	moco insertion factor for PaoABC aldehyde oxidoreductase	AAC73386.1	A	C (6)/A (5)	some non-synonymous	42	V	G (6)/V (5)
298491	paoC	2199	PaoABC aldehyde oxidoreductase, Moco-containing subunit	AAC73387.1	C	T (10)/C (1)	all synonymous	556	T	T (11)
299503	paoC	2199	PaoABC aldehyde oxidoreductase, Moco-containing subunit	AAC73387.1	T	T (10)/A (1)	some non-synonymous	219	D	D (10)/V (1)
307005	ecpC	2526	putative aromatic compound dioxygenase	AAC73394.1	C	C (10)/A (1)	some non-synonymous	518	D	D (10)/Y (1)
307154	ecpC	2526	putative aromatic compound dioxygenase	AAC73394.1	G	G (10)/T (1)	some non-synonymous	468	T	T (10)/N (1)
309794	ecpA	588	cryptic Mat fimbrillin gene	AAC73396.1	C	T (8)/C (3)	all synonymous	34	S	S (11)
331688	yahA	1089	c-di-GMP-specific phosphodiesterase	AAC73418.1	C	T (10)/C (1)	all synonymous	32	L	L (11)
331984	yahA	1089	c-di-GMP-specific phosphodiesterase	AAC73418.1	C	C (10)/T (1)	all synonymous	130	F	F (11)
332090	yahA	1089	c-di-GMP-specific phosphodiesterase	AAC73418.1	T	T (10)/G (1)	some non-synonymous	166	S	S (10)/A (1)
336360	yahF	1548	putative acyl-CoA synthetase with NAD(P)-binding domain and succinyl-CoA synthetase domain	AAC73423.1	C	C (10)/T (1)	some non-synonymous	120	S	S (10)/L (1)
337648	yahG	1419	hypothetical protein	AAC73424.1	C	T (10)/C (1)	some non-synonymous	34	L	F (10)/L (1)
338757	yahG	1419	hypothetical protein	AAC73424.1	C	C (10)/T (1)	all synonymous	403	P	P (11)
340432	yahJ	1383	putative deaminase with metallo-dependent hydrolase domain	AAC73427.1	G	G (10)/A (1)	all synonymous	28	V	V (11)
342354	yahK	1050	putative oxidoreductase, Zn-dependent and NAD(P)-binding	AAC73428.1	C	T (10)/C (1)	all synonymous	83	L	L (11)
343710	yahL	816	hypothetical protein	AAC73429.1	C	C (10)/T (1)	some non-synonymous	104	P	P (10)/L (1)
346827	prpR	1587	propionate catabolism operon regulatory protein	AAC73433.1	C	C (10)/G (1)	some non-synonymous	281	V	V (10)/L (1)
347625	prpR	1587	propionate catabolism operon regulatory protein	AAC73433.1	A	A (10)/T (1)	some non-synonymous	15	W	W (10)/R (1)
351843	prpD	1452	2-methylcitrate dehydratase	AAC73437.1	C	C (10)/T (1)	all synonymous	469	L	L (11)
352966	prpE	1887	propionate--CoA ligase	AAC73438.1	C	C (10)/T (1)	some non-synonymous	346	A	A (10)/V (1)
353787	prpE	1887	propionate--CoA ligase	AAC73438.1	G	A (10)/G (1)	some non-synonymous	620	D	N (10)/D (1)
355819	codA	1284	cytosine/isoguanine deaminase	AAC73440.1	A	T (10)/A (1)	some non-synonymous	142	Q	L (10)/Q (1)
359170	cynS	471	cyanate aminohydrolase	AAC73443.1	C	C (10)/T (1)	some non-synonymous	153	T	T (10)/I (1)
359902	cynX	1155	putative cyanate transporter	AAC73444.1	C	C (10)/A (1)	some non-synonymous	229	S	S (10)/R (1)
360256	cynX	1155	putative cyanate transporter	AAC73444.1	C	C (10)/G (1)	some non-synonymous	347	S	S (10)/R (1)
363330	lacZ	3075	beta-D-galactosidase	AAC73447.1	C	C (10)/T (1)	some non-synonymous	734	A	A (10)/T (1)
363593	lacZ	3075	beta-D-galactosidase	AAC73447.1	C	C (10)/T (1)	some non-synonymous	646	R	R (10)/H (1)
364195	lacZ	3075	beta-D-galactosidase	AAC73447.1	C	C (6)/T (5)	all synonymous	445	V	V (11)
370693	mhpC	867	2-hydroxy-6-ketonona-2,4-dienedioic acid hydrolase	AAC73452.3	C	C (10)/A (1)	all synonymous	77	G	G (11)
371414	mhpD	810	2-keto-4-pentenoate hydratase	AAC73453.2	C	C (10)/T (1)	all synonymous	26	L	L (11)
373159	mhpE	1014	4-hyroxy-2-oxovalerate/4-hydroxy-2-oxopentanoic acid aldolase, class I	AAC73455.1	A	A (10)/G (1)	some non-synonymous	23	Q	Q (10)/R (1)
376491	yaiL	540	hypothetical protein	AAC73457.2	G	A (6)/G (5)	some non-synonymous	166	D	N (6)/D (5)
376998	frmB	834	S-formylglutathione hydrolase	AAC73458.1	C	G (9)/C (2)	some non-synonymous	199	D	H (9)/D (2)
385128	tauA	963	taurine transporter subunit	AAC73468.2	G	T (8)/G (3)	some non-synonymous	225	A	S (8)/A (3)
385739	tauB	768	taurine transporter subunit	AAC73469.1	G	G (10)/A (1)	some non-synonymous	103	M	M (10)/I (1)
394423	ampH	1158	penicillin-binding protein	AAC73479.1	C	C (10)/A (1)	some non-synonymous	363	M	M (10)/I (1)
396174	sbmA	1221	microcin B17 transporter	AAC73480.1	C	T (10)/C (1)	all synonymous	104	V	V (11)
396984	sbmA	1221	microcin B17 transporter	AAC73480.1	C	C (10)/T (1)	all synonymous	374	T	T (11)
399478	ddlA	1095	D-alanine-D-alanine ligase A	AAC73484.1	T	T (10)/A (1)	some non-synonymous	224	I	I (10)/F (1)
402197	phoA	1416	bacterial alkaline phosphatase	AAC73486.2	C	T (10)/C (1)	all synonymous	409	T	T (11)
404475	proC	810	pyrroline-5-carboxylate reductase, NAD(P)-binding	AAC73489.1	A	A (10)/T (1)	some non-synonymous	132	S	S (10)/T (1)
404572	proC	810	pyrroline-5-carboxylate reductase, NAD(P)-binding	AAC73489.1	A	A (10)/G (1)	all synonymous	99	G	G (11)
407000	aroM	678	conserved protein, AroM family	AAC73493.1	C	C (6)/A (5)	all synonymous	117	R	R (11)
409946	mak	909	manno(fructo)kinase	AAC73497.2	C	C (10)/T (1)	all synonymous	193	F	F (11)
416900	phoB	690	DNA-binding response regulator in two-component regulatory system with PhoR (or CreC)	AAC73502.1	C	C (10)/T (1)	all synonymous	179	L	L (11)
421289	proY	1374	proline-specific permease	AAC73505.1	C	C (10)/T (1)	all synonymous	360	I	I (11)
421914	malZ	1815	maltodextrin glucosidase	AAC73506.2	A	A (10)/C (1)	some non-synonymous	58	Q	Q (10)/P (1)
425642	tgt	1128	tRNA-guanine transglycosylase	AAC73509.1	G	A (10)/G (1)	all synonymous	94	Q	Q (11)
430008	yajD	348	conserved protein, HNH family	AAC73513.1	C	C (10)/T (1)	all synonymous	60	N	N (11)
431220	tsx	885	nucleoside channel, receptor of phage T6 and colicin K	AAC73514.1	C	C (10)/T (1)	all synonymous	6	L	L (11)
433728	ribD	1104	fused diaminohydroxyphosphoribosylaminopyrimidine deaminase and 5-amino-6-(5-phosphoribosylamino) uracil reductase	AAC73517.1	C	C (10)/T (1)	all synonymous	350	F	F (11)
439096	dxs	1863	1-deoxyxylulose-5-phosphate synthase, thiamine-requiring, FAD-requiring	AAC73523.1	G	G (10)/A (1)	all synonymous	102	G	G (11)
440885	thiI	1449	tRNA s(4)U8 sulfurtransferase	AAC73526.1	A	A (10)/T (1)	some non-synonymous	38	D	D (10)/V (1)
444170	yajQ	492	phage Phi6 host factor, ATP/GTP binding protein	AAC73529.2	C	C (10)/T (1)	all synonymous	88	S	S (11)
449493	cyoB	1992	cytochrome o ubiquinol oxidase subunit I	AAC73534.1	G	A (10)/G (1)	all synonymous	125	L	L (11)
450021	cyoA	948	cytochrome o ubiquinol oxidase subunit II	AAC73535.1	C	T (10)/C (1)	some non-synonymous	272	D	N (10)/D (1)
456077	clpP	624	proteolytic subunit of ClpA-ClpP and ClpX-ClpP ATP-dependent serine proteases	AAC73540.1	G	T (10)/G (1)	all synonymous	59	A	A (11)
458840	lon	2355	DNA-binding ATP-dependent protease La	AAC73542.1	A	G (10)/A (1)	all synonymous	243	E	E (11)
460031	lon	2355	DNA-binding ATP-dependent protease La	AAC73542.1	G	T (10)/G (1)	all synonymous	640	A	A (11)
460195	lon	2355	DNA-binding ATP-dependent protease La	AAC73542.1	A	A (10)/C (1)	some non-synonymous	695	N	N (10)/T (1)
461567	ppiD	1872	periplasmic folding chaperone, has an inactive PPIase domain	AAC73544.1	C	C (10)/T (1)	all synonymous	143	N	N (11)
470036	mdlB	1782	fused predicted multidrug transporter subunits of ABC superfamily: ATP-binding components	AAC73552.1	G	G (10)/A (1)	all synonymous	59	L	L (11)
473242	amtB	1287	ammonium transporter	AAC73554.1	C	T (10)/C (1)	all synonymous	351	T	T (11)
474757	ybaY	573	outer membrane lipoprotein	AAC73556.1	G	G (9)/C (2)	some non-synonymous	52	G	G (9)/A (2)
481597	acrB	3150	multidrug efflux system protein	AAC73564.1	T	T (6)/G (5)	all synonymous	677	A	A (11)
482002	acrB	3150	multidrug efflux system protein	AAC73564.1	C	C (10)/T (1)	all synonymous	542	L	L (11)
483243	acrB	3150	multidrug efflux system protein	AAC73564.1	C	T (10)/C (1)	some non-synonymous	129	V	I (10)/V (1)
485212	acrR	648	DNA-binding transcriptional repressor	AAC73566.1	G	G (10)/A (1)	all synonymous	76	E	E (11)
485231	acrR	648	DNA-binding transcriptional repressor	AAC73566.1	G	A (8)/G (3)	some non-synonymous	83	G	S (8)/G (3)
486341	mscK	3363	mechanosensitive channel protein, intermediate conductance, K+ regulated	AAC73567.1	A	G (10)/T (1)	all synonymous	194	T	T (11)
490238	ybaN	378	inner membrane protein, DUF454 family	AAC73570.1	C	C (10)/T (1)	some non-synonymous	45	R	R (10)/C (1)
493721	recR	606	gap repair protein	AAC73574.1	G	G (10)/A (1)	all synonymous	31	T	T (11)
499790	gsk	1305	inosine/guanosine kinase	AAC73579.1	C	C (10)/T (1)	some non-synonymous	148	P	P (10)/S (1)
500281	gsk	1305	inosine/guanosine kinase	AAC73579.1	C	C (10)/A (1)	all synonymous	311	G	G (11)
502459	ybaL	1677	putative transporter with NAD(P)-binding Rossmann-fold domain	AAC73580.1	G	G (10)/A (1)	some non-synonymous	2	H	H (10)/Y (1)
504307	ushA	1653	bifunctional UDP-sugar hydrolase/5'-nucleotidase	AAC73582.1	C	C (10)/A (1)	some non-synonymous	57	A	A (10)/E (1)
508315	copA	2505	copper transporter	AAC73586.1	C	C (10)/T (1)	all synonymous	763	A	A (11)
508859	copA	2505	copper transporter	AAC73586.1	C	C (10)/T (1)	some non-synonymous	582	G	G (10)/D (1)
511811	ybaT	1293	putative amino acid transporter	AAC73588.1	G	G (10)/A (1)	all synonymous	4	T	T (11)
511859	ybaT	1293	putative amino acid transporter	AAC73588.1	C	C (10)/T (1)	all synonymous	20	S	S (11)
512746	ybaT	1293	putative amino acid transporter	AAC73588.1	T	G (8)/T (3)	some non-synonymous	316	L	R (8)/L (3)
516300	ybbM	780	inner membrane protein, UPF0014 family	AAC73593.2	C	C (10)/T (1)	some non-synonymous	165	T	T (10)/M (1)
520750	ybbP	2415	putative ABC transporter permease	AAC73598.1	G	T (9)/G (2)	some non-synonymous	371	D	Y (9)/D (2)
520899	ybbP	2415	putative ABC transporter permease	AAC73598.1	G	G (10)/A (1)	all synonymous	420	V	V (11)
530987	allS	927	DNA-binding transcriptional activator of the allD operon	AAC73606.1	C	T (10)/C (1)	all synonymous	153	E	E (11)
531681	allA	483	ureidoglycolate hydrolase	AAC73607.1	C	C (10)/A (1)	some non-synonymous	3	L	L (10)/I (1)
535236	hyi	777	hydroxypyruvate isomerase	AAC73610.1	A	T (10)/A (1)	some non-synonymous	101	K	N (10)/K (1)
540010	ybbY	1302	putative uracil/xanthine transporter	AAC73615.2	A	G (10)/- (1)	some non-synonymous	74	P	P (10)/? (1)
540522	ybbY	1302	putative uracil/xanthine transporter	AAC73615.2	C	C (10)/A (1)	some non-synonymous	245	A	A (10)/E (1)
543508	allC	1236	allantoate amidohydrolase	AAC73618.1	T	T (10)/G (1)	some non-synonymous	337	T	T (10)/P (1)
544133	allC	1236	allantoate amidohydrolase	AAC73618.1	G	A (10)/G (1)	all synonymous	128	G	G (11)
550755	purK	1068	N5-carboxyaminoimidazole ribonucleotide synthase	AAC73624.1	C	A (10)/T (1)	some non-synonymous	355	G	C (10)/S (1)
552633	lpxH	723	UDP-2,3-diacylglucosamine pyrophosphatase	AAC73626.1	G	A (6)/G (5)	all synonymous	177	N	N (11)
554409	cysS	1386	cysteinyl-tRNA synthetase	AAC73628.1	G	G (10)/T (1)	all synonymous	192	P	P (11)
555675	ybcI	522	inner membrane protein, DUF457 family	AAC73629.1	C	C (10)/T (1)	all synonymous	34	L	L (11)
558415	sfmC	693	pilin chaperone, periplasmic	AAC73633.1	C	T (6)/C (5)	all synonymous	73	F	F (11)
559068	sfmD	2604	putative outer membrane export usher protein	AAC73634.1	C	T (10)/C (1)	some non-synonymous	50	S	F (10)/S (1)
562583	sfmF	516	putative fimbrial-like adhesin protein	AAC73636.1	G	G (10)/- (1)	some non-synonymous	11	G	G (10)/? (1)
562584	sfmF	516	putative fimbrial-like adhesin protein	AAC73636.1	G	G (10)/- (1)	some non-synonymous	11	G	G (10)/? (1)
562585	sfmF	516	putative fimbrial-like adhesin protein	AAC73636.1	G	G (10)/- (1)	some non-synonymous	11	G	G (10)/? (1)
562586	sfmF	516	putative fimbrial-like adhesin protein	AAC73636.1	C	T (10)/- (1)	some non-synonymous	12	L	L (10)/? (1)
562587	sfmF	516	putative fimbrial-like adhesin protein	AAC73636.1	T	T (10)/- (1)	some non-synonymous	12	L	L (10)/? (1)
562588	sfmF	516	putative fimbrial-like adhesin protein	AAC73636.1	A	A (10)/- (1)	some non-synonymous	12	L	L (10)/? (1)
562589	sfmF	516	putative fimbrial-like adhesin protein	AAC73636.1	C	C (10)/- (1)	some non-synonymous	13	L	L (10)/? (1)
562590	sfmF	516	putative fimbrial-like adhesin protein	AAC73636.1	T	T (10)/- (1)	some non-synonymous	13	L	L (10)/? (1)
562591	sfmF	516	putative fimbrial-like adhesin protein	AAC73636.1	G	G (10)/- (1)	some non-synonymous	13	L	L (10)/? (1)
562592	sfmF	516	putative fimbrial-like adhesin protein	AAC73636.1	T	T (10)/- (1)	some non-synonymous	14	W	W (10)/? (1)
588208	nfrA	2973	bacteriophage N4 receptor, outer membrane subunit	AAC73669.1	C	C (10)/T (1)	some non-synonymous	657	W	W (10)/* (1)
589405	nfrA	2973	bacteriophage N4 receptor, outer membrane subunit	AAC73669.1	G	G (10)/C (1)	some non-synonymous	258	T	T (10)/S (1)
589758	nfrA	2973	bacteriophage N4 receptor, outer membrane subunit	AAC73669.1	C	C (10)/T (1)	all synonymous	140	Q	Q (11)
597464	cusB	1224	copper/silver efflux system, membrane fusion protein	AAC73675.1	G	G (10)/T (1)	some non-synonymous	255	A	A (10)/S (1)
597647	cusB	1224	copper/silver efflux system, membrane fusion protein	AAC73675.1	C	C (10)/A (1)	some non-synonymous	316	Q	Q (10)/K (1)
601615	pheP	1377	phenylalanine transporter	AAC73677.1	T	T (10)/C (1)	some non-synonymous	145	I	I (10)/T (1)
610788	fepA	2241	iron-enterobactin outer membrane transporter	AAC73685.1	G	G (10)/A (1)	all synonymous	310	N	N (11)
612348	fes	1125	enterobactin/ferric enterobactin esterase	AAC73686.1	T	C (10)/T (1)	some non-synonymous	104	L	P (10)/L (1)
613829	entF	3882	enterobactin synthase multienzyme complex component, ATP-dependent	AAC73687.1	C	T (10)/C (1)	all synonymous	150	T	T (11)
614578	entF	3882	enterobactin synthase multienzyme complex component, ATP-dependent	AAC73687.1	G	A (10)/G (1)	some non-synonymous	400	R	H (10)/R (1)
614699	entF	3882	enterobactin synthase multienzyme complex component, ATP-dependent	AAC73687.1	G	G (10)/A (1)	all synonymous	440	A	A (11)
616805	entF	3882	enterobactin synthase multienzyme complex component, ATP-dependent	AAC73687.1	G	A (10)/G (1)	all synonymous	1142	T	T (11)
624895	entC	1176	isochorismate synthase 1	AAC73694.1	C	C (10)/T (1)	some non-synonymous	263	P	P (10)/L (1)
626062	entE	1611	2,3-dihydroxybenzoate-AMP ligase component of enterobactin synthase multienzyme complex	AAC73695.1	C	C (10)/T (1)	some non-synonymous	257	A	A (10)/V (1)
632095	ybdH	1089	putative oxidoreductase	AAC73700.1	C	A (10)/C (1)	all synonymous	202	A	A (11)
633676	ybdL	1161	methionine aminotransferase, PLP-dependent	AAC73701.1	G	G (10)/T (1)	some non-synonymous	290	A	A (10)/S (1)
635433	ybdN	1221	hypothetical protein	AAC73703.1	T	T (10)/C (1)	all synonymous	120	V	V (11)
639110	ahpF	1566	alkyl hydroperoxide reductase, F52a subunit, FAD/NAD(P)-binding	AAC73707.2	A	A (10)/T (1)	some non-synonymous	45	E	E (10)/D (1)
641526	ybdR	1239	putative oxidoreductase, Zn-dependent and NAD(P)-binding	AAC73709.1	C	T (10)/C (1)	all synonymous	72	D	D (11)
641616	ybdR	1239	putative oxidoreductase, Zn-dependent and NAD(P)-binding	AAC73709.1	C	C (10)/T (1)	all synonymous	102	A	A (11)
644059	rna	807	ribonuclease I	AAC73712.1	A	A (10)/G (1)	all synonymous	56	R	R (11)
645498	citT	1464	citrate:succinate antiporter	AAC73713.1	G	A (10)/G (1)	all synonymous	102	T	T (11)
648514	citF	1533	citrate lyase, citrate-ACP transferase (alpha) subunit	AAC73716.1	G	A (10)/G (1)	some non-synonymous	94	T	I (10)/T (1)
648670	citF	1533	citrate lyase, citrate-ACP transferase (alpha) subunit	AAC73716.1	C	C (10)/A (1)	some non-synonymous	42	R	R (10)/L (1)
649579	citE	909	citrate lyase, citryl-ACP lyase (beta) subunit	AAC73717.2	G	C (6)/G (5)	some non-synonymous	45	D	E (6)/D (5)
650032	citC	1059	[citrate [pro-3S]-lyase] ligase	AAC73719.2	T	T (9)/G (2)	some non-synonymous	350	T	T (9)/P (2)
650293	citC	1059	[citrate [pro-3S]-lyase] ligase	AAC73719.2	G	A (8)/G (3)	some non-synonymous	263	P	S (8)/P (3)
651939	dpiB	1659	sensory histidine kinase in two-component regulatory system with citB	AAC73720.1	G	G (10)/A (1)	some non-synonymous	161	G	G (10)/D (1)
652327	dpiB	1659	sensory histidine kinase in two-component regulatory system with citB	AAC73720.1	G	G (10)/A (1)	all synonymous	290	V	V (11)
654999	dcuC	1386	anaerobic C4-dicarboxylate transport	AAC73722.1	C	C (10)/T (1)	some non-synonymous	65	V	V (10)/I (1)
660091	ybeF	954	putative DNA-binding transcriptional regulator	AAC73730.2	T	T (10)/C (1)	some non-synonymous	171	N	N (10)/D (1)
661190	lipB	642	octanoyltransferase; octanoyl-[ACP]:protein N-octanoyltransferase	AAC73731.2	C	C (10)/A (1)	some non-synonymous	104	L	L (10)/F (1)
667570	rlmH	468	23S rRNA m(3)Psi1915 pseudouridine methyltransferase, SAM-dependent	AAC73737.1	C	C (10)/T (1)	all synonymous	123	S	S (11)
667754	rlmH	468	23S rRNA m(3)Psi1915 pseudouridine methyltransferase, SAM-dependent	AAC73737.1	G	G (10)/A (1)	some non-synonymous	62	A	A (10)/V (1)
670562	holA	1032	DNA polymerase III, delta subunit	AAC73741.1	C	C (10)/T (1)	all synonymous	89	P	P (11)
670861	lptE	582	LPS assembly OM complex LptDE, lipoprotein component	AAC73742.1	C	T (6)/C (5)	all synonymous	183	T	T (11)
672732	leuS	2583	leucyl-tRNA synthetase	AAC73743.1	C	C (10)/T (1)	all synonymous	425	Q	Q (11)
678602	ybeT	555	conserved protein, Sel1 family	AAC73748.1	C	T (10)/C (1)	some non-synonymous	10	A	T (10)/A (1)
681006	hscC	1671	Hsp70 family chaperone Hsc62, binds to RpoD and inhibits transcription	AAC73751.1	C	C (10)/T (1)	some non-synonymous	537	M	M (10)/I (1)
683945	gltL	726	glutamate, aspartate ABC transporter ATP-binding subunit	AAC73753.1	C	C (10)/T (1)	all synonymous	178	V	V (11)
685644	gltJ	741	glutamate, aspartate ABC transporter permease subunit	AAC73755.1	G	G (10)/A (1)	all synonymous	83	T	T (11)
689470	lnt	1539	apolipoprotein N-acyltransferase	AAC73758.1	T	C (10)/T (1)	some non-synonymous	212	Q	R (10)/Q (1)
689984	lnt	1539	apolipoprotein N-acyltransferase	AAC73758.1	G	G (10)/T (1)	some non-synonymous	41	L	L (10)/M (1)
691291	ybeY	468	metal-binding heat shock protein required for rRNA maturation	AAC73760.1	C	T (10)/C (1)	some non-synonymous	92	V	M (10)/V (1)
691978	ybeZ	1041	putative protein with nucleoside triphosphate hydrolase domain	AAC73761.2	G	A (10)/G (1)	all synonymous	208	G	G (11)
693314	miaB	1425	tRNA-i(6)A37 methylthiotransferase	AAC73762.1	T	T (10)/G (1)	some non-synonymous	289	I	I (10)/L (1)
694092	miaB	1425	tRNA-i(6)A37 methylthiotransferase	AAC73762.1	G	G (10)/A (1)	all synonymous	29	T	T (11)
697470	asnB	1665	asparagine synthetase B	AAC73768.1	C	C (10)/A (1)	some non-synonymous	311	D	D (10)/Y (1)
697624	asnB	1665	asparagine synthetase B	AAC73768.1	T	T (10)/A (1)	some non-synonymous	259	E	E (10)/D (1)
699283	nagD	753	UMP phosphatase	AAC73769.1	C	A (10)/C (1)	all synonymous	89	V	V (11)
700440	nagC	1221	DNA-binding transcriptional dual regulator, repressor of N-acetylglucosamine	AAC73770.1	T	T (10)/C (1)	all synonymous	126	E	E (11)
704704	nagE	1947	fused N-acetyl glucosamine specific PTS enzyme: IIC, IIB, and IIA components	AAC73773.1	A	A (10)/C (1)	some non-synonymous	513	D	D (10)/A (1)
706141	glnS	1665	glutamyl-tRNA synthetase	AAC73774.1	C	T (10)/C (1)	all synonymous	276	L	L (11)
706440	glnS	1665	glutamyl-tRNA synthetase	AAC73774.1	G	G (10)/A (1)	some non-synonymous	375	M	M (10)/I (1)
706575	glnS	1665	glutamyl-tRNA synthetase	AAC73774.1	A	A (10)/T (1)	all synonymous	420	A	A (11)
710972	ybfE	294	conserved protein, LexA-regulated	AAC73779.2	A	T (10)/A (1)	all synonymous	50	L	L (11)
711521	ybfF	765	acyl-CoA esterase	AAC73780.1	C	C (10)/A (1)	some non-synonymous	169	G	G (10)/W (1)
711766	ybfF	765	acyl-CoA esterase	AAC73780.1	C	G (10)/C (1)	some non-synonymous	87	G	A (10)/G (1)
712322	seqA	546	regulatory protein for replication initiation	AAC73781.1	C	C (10)/A (1)	some non-synonymous	38	A	A (10)/E (1)
713805	pgm	1641	phosphoglucomutase	AAC73782.1	A	C (10)/A (1)	some non-synonymous	342	D	A (10)/D (1)
713923	pgm	1641	phosphoglucomutase	AAC73782.1	C	C (10)/T (1)	all synonymous	381	F	F (11)
714187	pgm	1641	phosphoglucomutase	AAC73782.1	C	T (10)/C (1)	all synonymous	469	S	S (11)
722345	kdpD	2685	fused sensory histidine kinase in two-component regulatory system with KdpE: signal sensing protein	AAC73789.1	C	C (10)/T (1)	all synonymous	431	L	L (11)
722980	kdpD	2685	fused sensory histidine kinase in two-component regulatory system with KdpE: signal sensing protein	AAC73789.1	C	T (10)/C (1)	some non-synonymous	220	E	K (10)/E (1)
723404	kdpD	2685	fused sensory histidine kinase in two-component regulatory system with KdpE: signal sensing protein	AAC73789.1	C	C (10)/T (1)	all synonymous	78	L	L (11)
727680	kdpA	1674	potassium translocating ATPase, subunit A	AAC73792.1	C	C (10)/T (1)	all synonymous	92	Q	Q (11)
727875	kdpA	1674	potassium translocating ATPase, subunit A	AAC73792.1	C	T (10)/C (1)	all synonymous	27	L	L (11)
743784	ybgK	933	putative allophanate hydrolase, subunit 2	AAC73806.1	C	C (10)/T (1)	some non-synonymous	107	H	H (10)/Y (1)
743928	ybgK	933	putative allophanate hydrolase, subunit 2	AAC73806.1	T	G (10)/T (1)	some non-synonymous	155	S	A (10)/S (1)
744336	ybgK	933	putative allophanate hydrolase, subunit 2	AAC73806.1	G	G (10)/T (1)	some non-synonymous	291	A	A (10)/S (1)
745318	nei	792	endonuclease VIII/ 5-formyluracil/5-hydroxymethyluracil DNA glycosylase	AAC73808.1	C	C (10)/G (1)	some non-synonymous	54	A	A (10)/G (1)
745539	nei	792	endonuclease VIII/ 5-formyluracil/5-hydroxymethyluracil DNA glycosylase	AAC73808.1	C	C (10)/T (1)	some non-synonymous	128	P	P (10)/S (1)
745719	nei	792	endonuclease VIII/ 5-formyluracil/5-hydroxymethyluracil DNA glycosylase	AAC73808.1	A	A (10)/- (1)	some non-synonymous	188	K	K (10)/? (1)
745959	abrB	1047	regulator of aidB expression; inner membrane protein	AAC73809.2	T	T (10)/C (1)	some non-synonymous	345	K	K (10)/R (1)
746029	abrB	1047	regulator of aidB expression; inner membrane protein	AAC73809.2	T	T (6)/G (5)	some non-synonymous	322	T	T (6)/P (5)
756572	sdhA	1767	succinate dehydrogenase, flavoprotein subunit	AAC73817.1	G	T (10)/G (1)	all synonymous	481	A	A (11)
760562	sucA	2802	2-oxoglutarate decarboxylase, thiamin-requiring	AAC73820.1	C	C (10)/T (1)	all synonymous	878	N	N (11)
777091	tolB	1293	periplasmic protein	AAC73834.1	G	G (10)/A (1)	all synonymous	43	Q	Q (11)
777241	tolB	1293	periplasmic protein	AAC73834.1	A	G (10)/T (1)	all synonymous	93	A	A (11)
777630	tolB	1293	periplasmic protein	AAC73834.1	G	G (9)/A (2)	some non-synonymous	223	R	R (9)/H (2)
781724	nadA	1044	quinolinate synthase, subunit A	AAC73837.1	C	C (10)/T (1)	all synonymous	139	Y	Y (11)
783103	pnuC	720	nicotinamide riboside transporter	AAC73838.1	C	C (10)/A (1)	some non-synonymous	239	H	H (10)/N (1)
784026	zitB	942	zinc efflux system	AAC73839.1	G	G (10)/- (1)	some non-synonymous	7	H	H (10)/? (1)
784027	zitB	942	zinc efflux system	AAC73839.1	T	T (10)/- (1)	some non-synonymous	7	H	H (10)/? (1)
784028	zitB	942	zinc efflux system	AAC73839.1	G	G (10)/- (1)	some non-synonymous	7	H	H (10)/? (1)
784029	zitB	942	zinc efflux system	AAC73839.1	T	T (10)/- (1)	some non-synonymous	6	S	S (10)/? (1)
784030	zitB	942	zinc efflux system	AAC73839.1	G	G (10)/- (1)	some non-synonymous	6	S	S (10)/? (1)
784031	zitB	942	zinc efflux system	AAC73839.1	A	A (10)/- (1)	some non-synonymous	6	S	S (10)/? (1)
784393	ybgS	381	hypothetical protein	AAC73840.1	G	G (10)/T (1)	some non-synonymous	50	R	R (10)/S (1)
789440	galT	1047	galactose-1-phosphate uridylyltransferase	AAC73845.1	C	C (10)/T (1)	all synonymous	271	Q	Q (11)
790446	galE	1017	UDP-galactose-4-epimerase	AAC73846.1	T	T (10)/C (1)	some non-synonymous	278	K	K (10)/R (1)
793280	modE	789	DNA-binding transcriptional repressor for the molybdenum transport operon modABC	AAC73848.1	C	C (10)/T (1)	all synonymous	196	A	A (11)
794938	modA	774	molybdate transporter subunit	AAC73850.1	C	C (10)/T (1)	all synonymous	209	T	T (11)
796517	modC	1059	molybdate transporter subunit	AAC73852.1	G	G (10)/T (1)	all synonymous	247	A	A (11)
798083	pgl	996	6-phosphogluconolactonase	AAC73854.1	A	A (10)/T (1)	some non-synonymous	92	Q	Q (10)/L (1)
799778	ybhD	954	putative DNA-binding transcriptional regulator	AAC73855.2	A	A (10)/G (1)	all synonymous	7	S	S (11)
804301	ybhJ	2262	putative hydratase	AAC73858.2	G	G (10)/T (1)	some non-synonymous	526	D	D (10)/Y (1)
804483	ybhJ	2262	putative hydratase	AAC73858.2	A	C (9)/A (2)	some non-synonymous	586	R	S (9)/R (2)
807506	bioA	1290	7,8-diaminopelargonic acid synthase, PLP-dependent	AAC73861.1	C	C (10)/A (1)	all synonymous	325	A	A (11)
808264	bioA	1290	7,8-diaminopelargonic acid synthase, PLP-dependent	AAC73861.1	C	C (10)/T (1)	some non-synonymous	73	D	D (10)/N (1)
810732	bioF	1155	8-amino-7-oxononanoate synthase	AAC73863.1	C	T (6)/C (5)	all synonymous	377	L	L (11)
812103	bioD	678	dethiobiotin synthetase	AAC73865.1	T	G (8)/T (3)	some non-synonymous	204	I	S (8)/I (3)
817876	moaC	486	molybdopterin biosynthesis, protein C	AAC73870.1	G	G (10)/T (1)	all synonymous	28	A	A (11)
818750	moaE	453	molybdopterin synthase, large subunit	AAC73872.1	G	T (8)/G (3)	some non-synonymous	78	R	L (8)/R (3)
818806	moaE	453	molybdopterin synthase, large subunit	AAC73872.1	G	A (10)/G (1)	some non-synonymous	97	V	I (10)/V (1)
819789	ybhL	705	inner membrane protein, UPF0005 family	AAC73873.1	G	G (10)/A (1)	some non-synonymous	228	R	R (10)/Q (1)
820067	ybhM	714	inner membrane protein, UPF0005 family	AAC73874.1	A	A (10)/T (1)	some non-synonymous	18	R	R (10)/W (1)
820069	ybhM	714	inner membrane protein, UPF0005 family	AAC73874.1	G	G (10)/A (1)	all synonymous	18	R	R (11)
823048	ybhP	762	conserved protein, endo/exonuclease/phosphatase family PFAM PF03372	AAC73877.1	C	C (10)/T (1)	some non-synonymous	225	A	A (10)/T (1)
827797	ybhF	1737	fused predicted transporter subunits of ABC superfamily: ATP-binding components	AAC73881.2	C	C (10)/T (1)	all synonymous	136	A	A (11)
829244	ybiH	672	putative DNA-binding transcriptional regulator	AAC73883.2	G	G (10)/A (1)	some non-synonymous	208	T	T (10)/I (1)
833381	dinG	2151	ATP-dependent DNA helicase	AAC73886.1	G	T (6)/G (5)	all synonymous	363	A	A (11)
833947	dinG	2151	ATP-dependent DNA helicase	AAC73886.1	A	A (10)/G (1)	some non-synonymous	552	D	D (10)/G (1)
835377	ybiB	963	putative family 3 glycosyltransferase	AAC73887.1	A	A (10)/G (1)	some non-synonymous	303	T	T (10)/A (1)
835906	ybiC	1086	putative dehydrogenase	AAC73888.1	C	T (10)/C (1)	all synonymous	111	A	A (11)
836610	ybiC	1086	putative dehydrogenase	AAC73888.1	G	G (10)/A (1)	some non-synonymous	346	G	G (10)/D (1)
837418	ybiI	267	DksA-type zinc finger protein	AAC73890.1	G	G (10)/A (1)	some non-synonymous	88	R	R (10)/C (1)
837500	ybiI	267	DksA-type zinc finger protein	AAC73890.1	A	A (10)/G (1)	all synonymous	60	C	C (11)
837610	ybiI	267	DksA-type zinc finger protein	AAC73890.1	C	C (10)/T (1)	some non-synonymous	24	A	A (10)/T (1)
837851[+1]	ybiX	678	conserved protein, Fe(II)-dependent oxygenase superfamily	AAC73891.2	-	T (10)/- (1)	some non-synonymous	194	N	N (10)/? (1)
837851[+2]	ybiX	678	conserved protein, Fe(II)-dependent oxygenase superfamily	AAC73891.2	-	C (10)/- (1)	some non-synonymous	194	N	D (10)/? (1)
837852	ybiX	678	conserved protein, Fe(II)-dependent oxygenase superfamily	AAC73891.2	G	G (10)/T (1)	some non-synonymous	193	N	N (10)/K (1)
837853[+1]	ybiX	678	conserved protein, Fe(II)-dependent oxygenase superfamily	AAC73891.2	-	A (10)/- (1)	some non-synonymous	193	N	I (10)/? (1)
837853[+2]	ybiX	678	conserved protein, Fe(II)-dependent oxygenase superfamily	AAC73891.2	-	A (10)/- (1)	some non-synonymous	193	N	I (10)/? (1)
837853[+3]	ybiX	678	conserved protein, Fe(II)-dependent oxygenase superfamily	AAC73891.2	-	T (10)/- (1)	some non-synonymous	193	N	N (10)/? (1)
837853[+4]	ybiX	678	conserved protein, Fe(II)-dependent oxygenase superfamily	AAC73891.2	-	A (10)/- (1)	some non-synonymous	193	N	I (10)/? (1)
837853[+5]	ybiX	678	conserved protein, Fe(II)-dependent oxygenase superfamily	AAC73891.2	-	T (10)/- (1)	some non-synonymous	193	N	N (10)/? (1)
837853[+6]	ybiX	678	conserved protein, Fe(II)-dependent oxygenase superfamily	AAC73891.2	-	T (10)/- (1)	some non-synonymous	193	N	N (10)/? (1)
837853[+7]	ybiX	678	conserved protein, Fe(II)-dependent oxygenase superfamily	AAC73891.2	-	T (10)/- (1)	some non-synonymous	193	N	N (10)/? (1)
838615	fiu	2283	catecholate siderophore receptor Fiu	AAC73892.1	G	T (10)/G (1)	all synonymous	714	R	R (11)
838629	fiu	2283	catecholate siderophore receptor Fiu	AAC73892.1	G	G (10)/A (1)	some non-synonymous	709	A	A (10)/V (1)
839603	fiu	2283	catecholate siderophore receptor Fiu	AAC73892.1	C	T (6)/C (5)	all synonymous	384	T	T (11)
840214	fiu	2283	catecholate siderophore receptor Fiu	AAC73892.1	A	A (10)/C (1)	some non-synonymous	181	S	S (10)/A (1)
842155	rlmF	927	23S rRNA m(6)A1618 methyltransferase, SAM-dependent	AAC73894.2	C	T (9)/C (2)	some non-synonymous	201	R	C (9)/R (2)
842192	rlmF	927	23S rRNA m(6)A1618 methyltransferase, SAM-dependent	AAC73894.2	C	C (10)/T (1)	some non-synonymous	213	A	A (10)/V (1)
843713	ybiO	2226	mechanosensitive channel protein, intermediate conductance	AAC73895.2	G	G (10)/A (1)	some non-synonymous	331	H	H (10)/Y (1)
843890	ybiO	2226	mechanosensitive channel protein, intermediate conductance	AAC73895.2	T	C (10)/T (1)	some non-synonymous	272	S	G (10)/S (1)
851481	ybiP	1584	putative hydrolase, inner membrane	AAC73902.1	G	G (10)/A (1)	all synonymous	114	L	L (11)
862449	ybiY	900	putative pyruvate formate lyase activating enzyme	AAC73911.2	C	A (10)/C (1)	some non-synonymous	96	A	S (10)/A (1)
863110	fsaA	663	fructose-6-phosphate aldolase 1	AAC73912.2	C	C (10)/A (1)	all synonymous	82	I	I (11)
863802	moeB	750	molybdopterin synthase sulfurylase	AAC73913.1	G	G (10)/A (1)	some non-synonymous	184	A	A (10)/V (1)
867638	gsiA	1872	glutathione transporter ATP-binding protein, ABC superfamily	AAC73916.2	C	C (10)/- (1)	some non-synonymous	299	A	A (10)/? (1)
867711	gsiA	1872	glutathione transporter ATP-binding protein, ABC superfamily	AAC73916.2	C	T (8)/C (3)	all synonymous	323	F	F (11)
872608	yliE	2349	putative membrane-anchored cyclic-di-GMP phosphodiesterase	AAC73920.1	G	A (10)/G (1)	some non-synonymous	136	R	Q (10)/R (1)
873159	yliE	2349	putative membrane-anchored cyclic-di-GMP phosphodiesterase	AAC73920.1	G	A (10)/G (1)	some non-synonymous	320	V	I (10)/V (1)
873644	yliE	2349	putative membrane-anchored cyclic-di-GMP phosphodiesterase	AAC73920.1	C	C (10)/T (1)	all synonymous	481	A	A (11)
874470	yliE	2349	putative membrane-anchored cyclic-di-GMP phosphodiesterase	AAC73920.1	G	G (10)/A (1)	some non-synonymous	757	V	V (10)/I (1)
875700	yliF	1329	putative membrane-anchored diguanylate cyclase	AAC73921.1	G	G (6)/A (5)	all synonymous	381	T	T (11)
876331	rimO	1326	ribosomal protein S12 methylthiotransferase; radical SAM superfamily	AAC73922.1	C	C (10)/T (1)	some non-synonymous	310	G	G (10)/S (1)
878542	yliI	1116	soluble aldose sugar dehydrogenase	AAC73924.1	C	C (10)/T (1)	some non-synonymous	193	P	P (10)/L (1)
881906	deoR	759	DNA-binding transcriptional repressor	AAC73927.1	G	G (10)/A (1)	some non-synonymous	18	R	R (10)/C (1)
883388	mdfA	1233	multidrug efflux system protein	AAC73929.1	A	A (10)/C (1)	some non-synonymous	165	I	I (10)/L (1)
891031	nfsA	723	nitroreductase A, NADPH-dependent, FMN-dependent	AAC73938.1	C	C (10)/T (1)	some non-synonymous	209	R	R (10)/W (1)
891556	rimK	903	ribosomal protein S6 modification protein	AAC73939.1	C	C (10)/T (1)	some non-synonymous	123	P	P (10)/S (1)
896895	potI	846	putrescine transporter subunit: membrane component of ABC superfamily	AAC73944.1	A	G (10)/A (1)	some non-synonymous	197	I	V (10)/I (1)
897041	potI	846	putrescine transporter subunit: membrane component of ABC superfamily	AAC73944.1	G	A (10)/G (1)	all synonymous	245	L	L (11)
899349	artJ	732	arginine binding protein, periplasmic	AAC73947.1	A	C (10)/A (1)	all synonymous	150	T	T (11)
900973	artQ	717	arginine transporter subunit	AAC73949.1	G	A (8)/G (3)	all synonymous	167	N	N (11)
905352	ybjS	1014	putative NAD(P)H-binding oxidoreductase with NAD(P)-binding Rossmann-fold domain	AAC73955.2	C	C (10)/T (1)	some non-synonymous	209	E	E (10)/K (1)
905686	ybjS	1014	putative NAD(P)H-binding oxidoreductase with NAD(P)-binding Rossmann-fold domain	AAC73955.2	C	T (10)/C (1)	all synonymous	97	L	L (11)
907591	ltaE	1002	L-allo-threonine aldolase, PLP-dependent	AAC73957.1	C	C (10)/T (1)	all synonymous	309	L	L (11)
907968	ltaE	1002	L-allo-threonine aldolase, PLP-dependent	AAC73957.1	T	G (10)/T (1)	some non-synonymous	184	I	L (10)/I (1)
910672	hcr	969	HCP oxidoreductase, NADH-dependent	AAC73959.1	C	A (9)/C (2)	all synonymous	234	A	A (11)
913247	ybjE	900	putative transporter	AAC73961.2	C	C (10)/T (1)	all synonymous	278	A	A (11)
913978	ybjE	900	putative transporter	AAC73961.2	A	A (10)/T (1)	some non-synonymous	35	W	W (10)/R (1)
914682	aqpZ	696	aquaporin Z	AAC73962.1	G	G (10)/A (1)	some non-synonymous	197	Q	Q (10)/* (1)
915009	aqpZ	696	aquaporin Z	AAC73962.1	G	G (10)/A (1)	some non-synonymous	88	Q	Q (10)/* (1)
917344	ybjD	1659	conserved protein with nucleoside triphosphate hydrolase domain	AAC73963.1	G	G (10)/A (1)	some non-synonymous	550	R	R (10)/H (1)
918864	macA	1116	macrolide transporter subunit, membrane fusion protein (MFP) component	AAC73965.2	C	C (10)/G (1)	some non-synonymous	136	A	A (10)/G (1)
919997	macB	1947	fused macrolide transporter subunits of ABC superfamily: ATP-binding component/membrane component	AAC73966.1	C	C (10)/T (1)	some non-synonymous	143	A	A (10)/V (1)
924073	clpA	2277	ATPase and specificity subunit of ClpA-ClpP ATP-dependent serine protease, chaperone activity	AAC73969.1	C	C (10)/T (1)	all synonymous	529	T	T (11)
927938	cydC	1722	fused glutathione, cysteine exporter subunits of ABC superfamily: membrane component/ATP-binding component	AAC73972.1	T	T (6)/G (5)	some non-synonymous	161	T	T (6)/P (5)
937928	rarA	1344	DNA-dependent ATPase involved in processing recombination intermediates at replication forks	AAC73978.1	A	A (10)/C (1)	some non-synonymous	238	T	T (10)/P (1)
940472	dmsA	2445	dimethyl sulfoxide reductase, anaerobic, subunit A	AAC73980.2	C	C (10)/T (1)	all synonymous	97	G	G (11)
943146	dmsB	618	dimethyl sulfoxide reductase, anaerobic, subunit B	AAC73981.1	G	G (10)/A (1)	all synonymous	170	P	P (11)
947543	ycaM	1431	putative transporter	AAC73985.2	T	T (10)/- (1)	some non-synonymous	364	G	G (10)/? (1)
947544	ycaM	1431	putative transporter	AAC73985.2	G	G (10)/- (1)	some non-synonymous	365	D	D (10)/? (1)
947545	ycaM	1431	putative transporter	AAC73985.2	A	A (10)/- (1)	some non-synonymous	365	D	D (10)/? (1)
947546	ycaM	1431	putative transporter	AAC73985.2	T	T (10)/- (1)	some non-synonymous	365	D	D (10)/? (1)
947547	ycaM	1431	putative transporter	AAC73985.2	A	A (10)/- (1)	some non-synonymous	366	M	M (10)/? (1)
947548	ycaM	1431	putative transporter	AAC73985.2	T	T (10)/- (1)	some non-synonymous	366	M	M (10)/? (1)
947549	ycaM	1431	putative transporter	AAC73985.2	G	G (10)/- (1)	some non-synonymous	366	M	M (10)/? (1)
947550	ycaM	1431	putative transporter	AAC73985.2	A	A (10)/- (1)	some non-synonymous	367	N	N (10)/? (1)
947551	ycaM	1431	putative transporter	AAC73985.2	A	A (10)/- (1)	some non-synonymous	367	N	N (10)/? (1)
947552	ycaM	1431	putative transporter	AAC73985.2	C	C (10)/- (1)	some non-synonymous	367	N	N (10)/? (1)
950302	pflA	741	pyruvate formate lyase activating enzyme 1	AAC73988.1	A	A (10)/T (1)	some non-synonymous	1	M	M (10)/K (1)
955804	ycaO	1761	ribosomal protein S12 methylthiotransferase accessory factor	AAC73991.2	C	C (10)/T (1)	some non-synonymous	18	A	A (10)/T (1)
961895	rpsA	1674	30S ribosomal subunit protein S1	AAC73997.1	A	A (10)/G (1)	all synonymous	226	K	K (11)
965321	ycaI	2265	inner membrane protein, ComEC family of competence proteins	AAC73999.2	C	C (10)/T (1)	all synonymous	593	G	G (11)
966062	msbA	1749	fused lipid transporter subunits of ABC superfamily: membrane component/ATP-binding component	AAC74000.1	G	G (10)/A (1)	all synonymous	73	G	G (11)
971036	ycbJ	894	hypothetical protein	AAC74005.1	G	G (10)/A (1)	some non-synonymous	21	C	C (10)/Y (1)
971274	ycbJ	894	hypothetical protein	AAC74005.1	G	A (10)/G (1)	all synonymous	100	V	V (11)
976413	mukB	4461	chromosome condensin MukBEF, ATPase and DNA-binding subunit	AAC74010.1	C	C (10)/T (1)	all synonymous	289	L	L (11)
977136	mukB	4461	chromosome condensin MukBEF, ATPase and DNA-binding subunit	AAC74010.1	C	C (10)/T (1)	some non-synonymous	530	R	R (10)/C (1)
977460	mukB	4461	chromosome condensin MukBEF, ATPase and DNA-binding subunit	AAC74010.1	C	C (10)/T (1)	some non-synonymous	638	R	R (10)/C (1)
977568	mukB	4461	chromosome condensin MukBEF, ATPase and DNA-binding subunit	AAC74010.1	C	C (10)/T (1)	all synonymous	674	L	L (11)
977837	mukB	4461	chromosome condensin MukBEF, ATPase and DNA-binding subunit	AAC74010.1	C	C (10)/T (1)	all synonymous	763	A	A (11)
989214	pncB	1203	nicotinate phosphoribosyltransferase	AAC74017.1	T	C (10)/T (1)	all synonymous	122	E	E (11)
990125	pepN	2613	aminopeptidase N	AAC74018.1	T	T (10)/G (1)	some non-synonymous	94	I	I (10)/S (1)
992440	pepN	2613	aminopeptidase N	AAC74018.1	A	A (10)/C (1)	some non-synonymous	866	T	T (10)/P (1)
993841	ssuC	792	putative alkanesulfonate transporter subunit	AAC74020.2	C	C (6)/A (5)	some non-synonymous	72	G	G (6)/V (5)
1004357	pyrD	1011	dihydro-orotate oxidase, FMN-linked	AAC74031.1	C	C (10)/A (1)	some non-synonymous	123	L	L (10)/I (1)
1007861	rlmL	2109	fused 23S rRNA m(2)G2445 and m(7)G2069 methyltransferase, SAM-dependent	AAC74034.1	A	T (10)/A (1)	all synonymous	265	A	A (11)
1012135	pqiA	1254	paraquat-inducible membrane protein A	AAC74036.1	C	C (10)/T (1)	all synonymous	304	V	V (11)
1015646	fabA	519	beta-hydroxydecanoyl thioester dehydrase	AAC74040.1	A	A (10)/T (1)	all synonymous	16	S	S (11)
1017334	ycbZ	1761	putative peptidase	AAC74041.1	G	G (10)/A (1)	all synonymous	63	A	A (11)
1017498	ycbZ	1761	putative peptidase	AAC74041.1	G	G (10)/A (1)	some non-synonymous	9	R	R (10)/C (1)
1018943	ompA	1041	outer membrane protein A (3a;II*;G;d)	AAC74043.1	G	G (10)/A (1)	all synonymous	112	L	L (11)
1021036	yccS	2154	inner membrane protein	AAC74046.2	A	A (10)/G (1)	all synonymous	691	L	L (11)
1021343	yccS	2154	inner membrane protein	AAC74046.2	C	C (10)/T (1)	all synonymous	588	V	V (11)
1024012	helD	2055	DNA helicase IV	AAC74048.1	C	C (10)/T (1)	all synonymous	107	L	L (11)
1027372	yccU	414	putative CoA-binding protein	AAC74051.2	G	G (10)/A (1)	all synonymous	68	P	P (11)
1028197	rlmI	1191	23S rRNA m(5)C1962 methyltransferase, SAM-dependent	AAC74053.2	G	G (10)/T (1)	all synonymous	332	G	G (11)
1031938	hyaA	1119	hydrogenase 1, small subunit	AAC74057.1	G	G (10)/A (1)	some non-synonymous	193	G	G (10)/S (1)
1038452	appC	1545	cytochrome bd-II oxidase, subunit I	AAC74063.1	C	C (10)/G (1)	some non-synonymous	497	A	A (10)/G (1)
1040509	appA	1299	phosphoanhydride phosphorylase	AAC74065.1	G	G (10)/A (1)	some non-synonymous	224	A	A (10)/T (1)
1041592	etk	2181	cryptic autophosphorylating protein tyrosine kinase Etk	AAC74066.1	G	G (10)/A (1)	all synonymous	614	R	R (11)
1046482	gfcD	2097	hypothetical protein	AAC74069.1	G	G (10)/A (1)	all synonymous	229	Y	Y (11)
1046617	gfcD	2097	hypothetical protein	AAC74069.1	G	G (10)/T (1)	all synonymous	184	R	R (11)
1046941	gfcD	2097	hypothetical protein	AAC74069.1	G	G (10)/A (1)	all synonymous	76	F	F (11)
1047069	gfcD	2097	hypothetical protein	AAC74069.1	G	G (10)/T (1)	some non-synonymous	34	Q	Q (10)/K (1)
1047999	gfcB	645	putative outer membrane lipoprotein	AAC74071.1	G	G (10)/A (1)	some non-synonymous	186	S	S (10)/L (1)
1051141	ymcE	231	cold shock gene	AAC74076.1	C	T (10)/- (1)	some non-synonymous	24	F	F (10)/? (1)
1052704	torS	2745	hybrid sensory histidine kinase in two-component regulatory system with TorR	AAC74078.2	C	C (10)/T (1)	some non-synonymous	900	A	A (10)/T (1)
1053910	torS	2745	hybrid sensory histidine kinase in two-component regulatory system with TorR	AAC74078.2	C	C (10)/T (1)	some non-synonymous	498	D	D (10)/N (1)
1054286	torS	2745	hybrid sensory histidine kinase in two-component regulatory system with TorR	AAC74078.2	G	G (10)/A (1)	all synonymous	372	D	D (11)
1059455	torA	2547	trimethylamine N-oxide (TMAO) reductase I, catalytic subunit	AAC74082.1	T	T (10)/G (1)	some non-synonymous	326	F	F (10)/C (1)
1059670	torA	2547	trimethylamine N-oxide (TMAO) reductase I, catalytic subunit	AAC74082.1	A	A (10)/- (1)	some non-synonymous	398	I	I (10)/? (1)
1059671	torA	2547	trimethylamine N-oxide (TMAO) reductase I, catalytic subunit	AAC74082.1	T	T (10)/- (1)	some non-synonymous	398	I	I (10)/? (1)
1059672	torA	2547	trimethylamine N-oxide (TMAO) reductase I, catalytic subunit	AAC74082.1	T	T (10)/- (1)	some non-synonymous	398	I	I (10)/? (1)
1059673	torA	2547	trimethylamine N-oxide (TMAO) reductase I, catalytic subunit	AAC74082.1	G	G (10)/- (1)	some non-synonymous	399	G	G (10)/? (1)
1059674	torA	2547	trimethylamine N-oxide (TMAO) reductase I, catalytic subunit	AAC74082.1	G	G (10)/- (1)	some non-synonymous	399	G	G (10)/? (1)
1059987	torA	2547	trimethylamine N-oxide (TMAO) reductase I, catalytic subunit	AAC74082.1	G	A (10)/G (1)	all synonymous	503	K	K (11)
1060419	torA	2547	trimethylamine N-oxide (TMAO) reductase I, catalytic subunit	AAC74082.1	G	G (10)/A (1)	all synonymous	647	P	P (11)
1069273	rutF	495	flavin:NADH reductase	AAC74092.2	G	T (9)/G (2)	some non-synonymous	102	T	K (9)/T (2)
1070275	rutD	801	putative aminoacrylate hydrolase, reactive intermediate detoxification	AAC74094.1	G	G (10)/- (1)	some non-synonymous	238	A	A (10)/? (1)
1071609	rutB	693	ureidoacrylate amidohydrolase	AAC74096.2	C	T (10)/C (1)	some non-synonymous	160	G	S (10)/G (1)
1071802	rutB	693	ureidoacrylate amidohydrolase	AAC74096.2	C	G (10)/C (1)	all synonymous	95	L	L (11)
1071994	rutB	693	ureidoacrylate amidohydrolase	AAC74096.2	C	T (6)/C (5)	all synonymous	31	T	T (11)
1074739	putA	3963	fused DNA-binding transcriptional regulator/proline dehydrogenase/pyrroline-5-carboxylate dehydrogenase	AAC74099.1	C	C (10)/T (1)	some non-synonymous	1123	A	A (10)/T (1)
1075312	putA	3963	fused DNA-binding transcriptional regulator/proline dehydrogenase/pyrroline-5-carboxylate dehydrogenase	AAC74099.1	G	G (10)/A (1)	some non-synonymous	932	H	H (10)/Y (1)
1075614	putA	3963	fused DNA-binding transcriptional regulator/proline dehydrogenase/pyrroline-5-carboxylate dehydrogenase	AAC74099.1	A	A (10)/T (1)	some non-synonymous	831	L	L (10)/Q (1)
1079952	putP	1509	proline:sodium symporter	AAC74100.1	G	A (10)/G (1)	all synonymous	475	A	A (11)
1083312	efeB	1272	deferrrochelatase, periplasmic	AAC74104.1	C	C (10)/T (1)	all synonymous	238	A	A (11)
1083552	efeB	1272	deferrrochelatase, periplasmic	AAC74104.1	C	C (10)/T (1)	all synonymous	318	D	D (11)
1083566	efeB	1272	deferrrochelatase, periplasmic	AAC74104.1	T	G (10)/T (1)	some non-synonymous	323	V	G (10)/V (1)
1085247	phoH	1065	conserved protein with nucleoside triphosphate hydrolase domain	AAC74105.1	C	C (10)/A (1)	some non-synonymous	345	L	L (10)/I (1)
1088975	pgaB	2019	poly-beta-1,6-N-acetyl-D-glucosamine (PGA) N-deacetylase; deacetylase required for biofilm adhesin polysaccharide PGA export; outer membrane lipoprotein	AAC74108.1	C	T (10)/C (1)	some non-synonymous	36	E	K (10)/E (1)
1089215	pgaA	2424	biofilm adhesin polysaccharide PGA secretin; OM porin; poly-beta-1,6-N-acetyl-D-glucosamine export protein	AAC74109.1	G	G (10)/A (1)	all synonymous	766	Y	Y (11)
1092582	ycdT	1359	diguanylate cyclase, membrane-anchored	AAC74110.1	C	G (10)/- (1)	some non-synonymous	162	P	A (10)/? (1)
1092869	ycdT	1359	diguanylate cyclase, membrane-anchored	AAC74110.1	A	A (10)/T (1)	all synonymous	257	V	V (11)
1097297	ghrA	939	glyoxylate/hydroxypyruvate reductase A	AAC74117.2	C	C (10)/T (1)	all synonymous	63	L	L (11)
1099247	ycdY	555	YcdX chaperone, redox enzyme maturation protein (REMP) required for swarming	AAC74119.1	A	A (10)/T (1)	some non-synonymous	129	S	S (10)/C (1)
1110802	opgH	2544	membrane glycosyltransferase	AAC74133.1	C	C (10)/A (1)	some non-synonymous	239	N	N (10)/K (1)
1111822	opgH	2544	membrane glycosyltransferase	AAC74133.1	C	C (10)/T (1)	all synonymous	579	F	F (11)
1115333	waaM	921	lauryl-acyl carrier protein (ACP)-dependent acyltransferase	AAC74138.1	T	T (10)/G (1)	some non-synonymous	158	N	N (10)/T (1)
1116248	yceA	1053	putative rhodanese-related sulfurtransferase	AAC74139.1	G	G (10)/A (1)	all synonymous	73	A	A (11)
1117586	yceI	576	secreted protein	AAC74140.1	G	A (10)/G (1)	all synonymous	38	F	F (11)
1121010	pyrC	1047	dihydro-orotase	AAC74146.1	G	G (10)/A (1)	some non-synonymous	274	T	T (10)/I (1)
1121813	pyrC	1047	dihydro-orotase	AAC74146.1	C	C (10)/T (1)	all synonymous	6	Q	Q (11)
1123013	grxB	648	glutaredoxin 2 (Grx2)	AAC74148.1	A	A (10)/C (1)	some non-synonymous	89	W	W (10)/G (1)
1124929	rimJ	585	ribosomal-protein-S5-alanine N-acetyltransferase	AAC74150.1	C	C (10)/T (1)	some non-synonymous	49	R	R (10)/C (1)
1125492	yceH	648	conserved protein, UPF0502 family	AAC74151.1	G	G (10)/A (1)	some non-synonymous	38	C	C (10)/Y (1)
1125711	yceH	648	conserved protein, UPF0502 family	AAC74151.1	C	C (10)/T (1)	some non-synonymous	111	A	A (10)/V (1)
1131087	flgD	696	flagellar hook assembly protein	AAC74159.1	C	C (10)/T (1)	some non-synonymous	4	A	A (10)/V (1)
1131094	flgD	696	flagellar hook assembly protein	AAC74159.1	C	C (10)/T (1)	all synonymous	6	T	T (11)
1134227	flgG	783	flagellar component of cell-distal portion of basal-body rod	AAC74162.1	C	C (10)/T (1)	all synonymous	92	S	S (11)
1135242	flgH	699	flagellar protein of basal-body outer-membrane L ring	AAC74163.1	T	T (10)/C (1)	all synonymous	152	V	V (11)
1142019	rne	3186	fused ribonucleaseE: endoribonuclease/RNA-binding protein/RNA degradosome binding protein	AAC74168.1	C	C (9)/T (2)	all synonymous	524	P	P (11)
1143341	rne	3186	fused ribonucleaseE: endoribonuclease/RNA-binding protein/RNA degradosome binding protein	AAC74168.1	C	C (10)/T (1)	some non-synonymous	84	A	A (10)/T (1)
1145394	yceF	585	Maf-like protein	AAC74171.2	T	T (10)/C (1)	some non-synonymous	142	E	E (10)/G (1)
1146479	yceD	522	conserved protein, DUF177 family	AAC74172.1	C	C (10)/- (1)	some non-synonymous	155	P	P (10)/? (1)
1146511	yceD	522	conserved protein, DUF177 family	AAC74172.1	C	C (10)/T (1)	all synonymous	165	A	A (11)
1146891	plsX	1071	putative phosphate acyltransferase	AAC74174.2	C	C (10)/T (1)	all synonymous	16	G	G (11)
1146974	plsX	1071	putative phosphate acyltransferase	AAC74174.2	C	C (10)/T (1)	some non-synonymous	44	A	A (10)/V (1)
1148371	fabH	954	3-oxoacyl-[acyl-carrier-protein] synthase III	AAC74175.1	G	G (10)/A (1)	all synonymous	130	A	A (11)
1150936	acpP	237	acyl carrier protein (ACP)	AAC74178.1	G	A (10)/G (1)	all synonymous	33	L	L (11)
1155737	holB	1005	DNA polymerase III, delta prime subunit	AAC74183.1	G	G (10)/T (1)	some non-synonymous	251	L	L (10)/F (1)
1155772	holB	1005	DNA polymerase III, delta prime subunit	AAC74183.1	C	C (10)/T (1)	some non-synonymous	263	A	A (10)/V (1)
1158983	fhuE	2190	ferric-rhodotorulic acid outer membrane transporter	AAC74186.1	C	C (10)/T (1)	some non-synonymous	598	G	G (10)/S (1)
1159959	fhuE	2190	ferric-rhodotorulic acid outer membrane transporter	AAC74186.1	G	G (10)/A (1)	all synonymous	272	S	S (11)
1162670	thiK	825	thiamin kinase	AAC74190.1	G	G (10)/A (1)	some non-synonymous	63	R	R (10)/H (1)
1163554	nagZ	1026	beta N-acetyl-glucosaminidase	AAC74191.1	A	G (10)/A (1)	all synonymous	79	P	P (11)
1167557	ycfQ	633	repressor for bhsA(ycfR)	AAC74195.2	C	C (9)/T (2)	some non-synonymous	167	V	V (9)/M (2)
1170869	mfd	3447	transcription-repair coupling factor	AAC74198.1	C	T (10)/C (1)	all synonymous	773	L	L (11)
1173685	ycfT	1074	inner membrane protein	AAC74199.1	C	C (10)/T (1)	some non-synonymous	235	W	W (10)/* (1)
1177259	lolE	1245	lipoprotein-releasing system transmembrane protein	AAC74202.1	C	C (9)/T (2)	all synonymous	239	R	R (11)
1177973	nagK	912	N-acetyl-D-glucosamine kinase	AAC74203.1	G	G (10)/A (1)	some non-synonymous	53	R	R (10)/H (1)
1178435	nagK	912	N-acetyl-D-glucosamine kinase	AAC74203.1	A	C (10)/A (1)	some non-synonymous	207	Q	P (10)/Q (1)
1181411	potD	1047	polyamine transporter subunit	AAC74207.1	C	C (10)/T (1)	all synonymous	214	P	P (11)
1182036	potD	1047	polyamine transporter subunit	AAC74207.1	C	C (10)/T (1)	some non-synonymous	6	R	R (10)/H (1)
1182283	potC	795	polyamine transporter subunit	AAC74208.1	C	T (10)/C (1)	all synonymous	187	A	A (11)
1226141	ycgJ	369	hypothetical protein	AAC74261.1	G	G (10)/A (1)	some non-synonymous	107	G	G (10)/R (1)
1227594	ycgM	660	putative isomerase/hydrolase	AAC74264.1	T	T (10)/C (1)	some non-synonymous	98	V	V (10)/A (1)
1228741	hlyE	912	hemolysin E	AAC74266.2	C	C (10)/T (1)	some non-synonymous	293	G	G (10)/S (1)
1230696	umuC	1269	DNA polymerase V, subunit C	AAC74268.1	G	G (10)/A (1)	all synonymous	96	E	E (11)
1233533	nhaB	1542	sodium:proton antiporter	AAC74270.1	C	T (10)/C (1)	all synonymous	136	V	V (11)
1258532	dauA	1680	C4-dicarboxylic acid transporter	AAC74290.2	C	C (10)/T (1)	some non-synonymous	499	V	V (10)/I (1)
1259072	dauA	1680	C4-dicarboxylic acid transporter	AAC74290.2	G	G (10)/T (1)	some non-synonymous	319	L	L (10)/M (1)
1260688	prs	948	phosphoribosylpyrophosphate synthase	AAC74291.1	A	A (10)/C (1)	all synonymous	137	G	G (11)
1265826	prmC	834	N5-glutamine methyltransferase, modifies release factors RF-1 and RF-2	AAC74296.1	C	C (10)/A (1)	some non-synonymous	170	S	S (10)/R (1)
1268181	kdsA	855	3-deoxy-D-manno-octulosonate 8-phosphate synthase	AAC74299.1	A	G (10)/A (1)	some non-synonymous	265	K	R (10)/K (1)
1270320	chaA	1101	calcium/sodium:proton antiporter	AAC74300.1	G	G (10)/A (1)	all synonymous	251	S	S (11)
1270995	chaA	1101	calcium/sodium:proton antiporter	AAC74300.1	C	C (10)/A (1)	all synonymous	26	V	V (11)
1272716	ychN	354	hypothetical protein	AAC74303.1	T	T (10)/G (1)	some non-synonymous	36	D	D (10)/A (1)
1277417	narK	1392	nitrate/nitrite transporter	AAC74307.1	C	T (10)/C (1)	all synonymous	80	L	L (11)
1277838	narK	1392	nitrate/nitrite transporter	AAC74307.1	T	G (6)/T (5)	some non-synonymous	220	V	G (6)/V (5)
1277894	narK	1392	nitrate/nitrite transporter	AAC74307.1	A	A (9)/G (2)	some non-synonymous	239	T	T (9)/A (2)
1279872	narG	3744	nitrate reductase 1, alpha subunit	AAC74308.1	C	C (10)/T (1)	all synonymous	262	T	T (11)
1283168	narH	1539	nitrate reductase 1, beta (Fe-S) subunit	AAC74309.1	G	G (10)/T (1)	all synonymous	114	A	A (11)
1284694	narJ	711	molybdenum-cofactor-assembly chaperone subunit (delta subunit) of nitrate reductase 1	AAC74310.1	G	G (10)/A (1)	all synonymous	111	P	P (11)
1302084	oppC	909	oligopeptide transporter subunit	AAC74327.1	C	C (10)/T (1)	some non-synonymous	76	P	P (10)/L (1)
1302134	oppC	909	oligopeptide transporter subunit	AAC74327.1	C	C (6)/T (5)	all synonymous	93	L	L (11)
1312592	ompW	639	outer membrane protein W	AAC74338.1	C	G (10)/C (1)	all synonymous	183	T	T (11)
1312595	ompW	639	outer membrane protein W	AAC74338.1	C	T (10)/C (1)	all synonymous	184	A	A (11)
1312598	ompW	639	outer membrane protein W	AAC74338.1	T	G (10)/T (1)	some non-synonymous	185	N	K (10)/N (1)
1312601[+1]	ompW	639	outer membrane protein W	AAC74338.1	-	C (10)/- (1)	some non-synonymous	186	Y	Y (10)/? (1)
1312601	ompW	639	outer membrane protein W	AAC74338.1	T	A (10)/T (1)	some non-synonymous	186	Y	* (10)/Y (1)
1312604	ompW	639	outer membrane protein W	AAC74338.1	G	T (10)/A (1)	some non-synonymous	187	K	N (10)/K (1)
1312609	ompW	639	outer membrane protein W	AAC74338.1	G	T (10)/G (1)	some non-synonymous	189	G	V (10)/G (1)
1312610	ompW	639	outer membrane protein W	AAC74338.1	C	G (10)/C (1)	all synonymous	189	G	G (11)
1312611	ompW	639	outer membrane protein W	AAC74338.1	G	T (10)/G (1)	some non-synonymous	190	G	C (10)/G (1)
1312612	ompW	639	outer membrane protein W	AAC74338.1	G	T (10)/G (1)	some non-synonymous	190	G	V (10)/G (1)
1312613	ompW	639	outer membrane protein W	AAC74338.1	T	A (10)/T (1)	all synonymous	190	G	G (11)
1312614	ompW	639	outer membrane protein W	AAC74338.1	G	C (10)/G (1)	some non-synonymous	191	A	P (10)/A (1)
1312615	ompW	639	outer membrane protein W	AAC74338.1	C	T (10)/C (1)	some non-synonymous	191	A	V (10)/A (1)
1312618	ompW	639	outer membrane protein W	AAC74338.1	A	C (10)/A (1)	some non-synonymous	192	Q	P (10)/Q (1)
1312620	ompW	639	outer membrane protein W	AAC74338.1	C	T (10)/C (1)	some non-synonymous	193	Q	* (10)/Q (1)
1312623	ompW	639	outer membrane protein W	AAC74338.1	C	- (10)/C (1)	some non-synonymous	194	H	H (1)/? (10)
1312625	ompW	639	outer membrane protein W	AAC74338.1	C	A (10)/T (1)	some non-synonymous	194	H	Q (10)/H (1)
1312628[+1]	ompW	639	outer membrane protein W	AAC74338.1	-	C (10)/- (1)	some non-synonymous	195	D	D (10)/? (1)
1312629	ompW	639	outer membrane protein W	AAC74338.1	A	C (10)/A (1)	some non-synonymous	196	S	R (10)/S (1)
1312631	ompW	639	outer membrane protein W	AAC74338.1	C	- (10)/C (1)	some non-synonymous	196	S	S (1)/? (10)
1312637	ompW	639	outer membrane protein W	AAC74338.1	C	A (10)/C (1)	all synonymous	198	R	R (11)
1312640	ompW	639	outer membrane protein W	AAC74338.1	C	G (10)/C (1)	all synonymous	199	L	L (11)
1312664	ompW	639	outer membrane protein W	AAC74338.1	A	C (10)/A (1)	all synonymous	207	S	S (11)
1312666	ompW	639	outer membrane protein W	AAC74338.1	C	C (10)/T (1)	some non-synonymous	208	A	A (10)/V (1)
1317209	trpC	1359	fused indole-3-glycerolphosphate synthetase/N-(5-phosphoribosyl)anthranilate isomerase	AAC74344.2	G	G (10)/T (1)	some non-synonymous	201	L	L (10)/I (1)
1319044	trpD	1596	fused glutamine amidotransferase (component II) of anthranilate synthase/anthranilate phosphoribosyl transferase	AAC74345.1	C	C (10)/G (1)	some non-synonymous	122	G	G (10)/A (1)
1320646	trpE	1563	component I of anthranilate synthase	AAC74346.1	T	C (9)/T (2)	some non-synonymous	109	S	G (9)/S (2)
1325616	rluB	876	23S rRNA pseudouridine(2605) synthase	AAC74351.1	G	G (10)/T (1)	all synonymous	247	P	P (11)
1325808	btuR	591	cob(I)alamin adenolsyltransferase/cobinamide ATP-dependent adenolsyltransferase	AAC74352.1	T	T (10)/C (1)	some non-synonymous	192	I	I (10)/V (1)
1326321	btuR	591	cob(I)alamin adenolsyltransferase/cobinamide ATP-dependent adenolsyltransferase	AAC74352.1	C	T (10)/C (1)	some non-synonymous	21	V	M (10)/V (1)
1332240	cysB	975	DNA-binding transcriptional dual regulator, O-acetyl-L-serine-binding	AAC74357.1	G	G (10)/T (1)	some non-synonymous	121	R	R (10)/L (1)
1332460	cysB	975	DNA-binding transcriptional dual regulator, O-acetyl-L-serine-binding	AAC74357.1	G	G (10)/A (1)	all synonymous	194	L	L (11)
1334449	acnA	2676	aconitate hydratase 1	AAC74358.1	G	G (10)/T (1)	some non-synonymous	199	G	G (10)/C (1)
1342566	yciZ	174	hypothetical protein	ABP93443.1	C	T (10)/C (1)	some non-synonymous	23	G	D (10)/G (1)
1343189	gmr	1986	cyclic-di-GMP phosphodiesterase; csgD regulator; modulator of Rnase II stability	AAC74367.1	A	A (10)/- (1)	some non-synonymous	526	P	P (10)/? (1)
1343190	gmr	1986	cyclic-di-GMP phosphodiesterase; csgD regulator; modulator of Rnase II stability	AAC74367.1	G	G (10)/- (1)	some non-synonymous	526	P	P (10)/? (1)
1343191	gmr	1986	cyclic-di-GMP phosphodiesterase; csgD regulator; modulator of Rnase II stability	AAC74367.1	G	G (10)/- (1)	some non-synonymous	526	P	P (10)/? (1)
1343192	gmr	1986	cyclic-di-GMP phosphodiesterase; csgD regulator; modulator of Rnase II stability	AAC74367.1	G	G (10)/- (1)	some non-synonymous	525	C	C (10)/? (1)
1343193	gmr	1986	cyclic-di-GMP phosphodiesterase; csgD regulator; modulator of Rnase II stability	AAC74367.1	C	C (10)/- (1)	some non-synonymous	525	C	C (10)/? (1)
1343861	gmr	1986	cyclic-di-GMP phosphodiesterase; csgD regulator; modulator of Rnase II stability	AAC74367.1	G	A (6)/G (5)	all synonymous	302	S	S (11)
1344682	gmr	1986	cyclic-di-GMP phosphodiesterase; csgD regulator; modulator of Rnase II stability	AAC74367.1	C	C (10)/T (1)	some non-synonymous	29	V	V (10)/I (1)
1347649	yciW	1128	putative oxidoreductase	AAC74369.2	C	C (10)/T (1)	all synonymous	161	V	V (11)
1353989	sapA	1644	antimicrobial peptide transport ABC transporter periplasmic binding protein	AAC74376.1	C	C (10)/T (1)	all synonymous	382	V	V (11)
1354026	sapA	1644	antimicrobial peptide transport ABC transporter periplasmic binding protein	AAC74376.1	G	A (10)/G (1)	some non-synonymous	370	S	L (10)/S (1)
1359272	puuD	765	gamma-Glu-GABA hydrolase	AAC74380.2	T	T (10)/- (1)	some non-synonymous	43	I	I (10)/? (1)
1359273	puuD	765	gamma-Glu-GABA hydrolase	AAC74380.2	G	G (10)/- (1)	some non-synonymous	44	A	A (10)/? (1)
1359274	puuD	765	gamma-Glu-GABA hydrolase	AAC74380.2	C	C (10)/- (1)	some non-synonymous	44	A	A (10)/? (1)
1359275	puuD	765	gamma-Glu-GABA hydrolase	AAC74380.2	G	G (10)/- (1)	some non-synonymous	44	A	A (10)/? (1)
1359276	puuD	765	gamma-Glu-GABA hydrolase	AAC74380.2	C	C (10)/- (1)	some non-synonymous	45	L	L (10)/? (1)
1359277	puuD	765	gamma-Glu-GABA hydrolase	AAC74380.2	T	T (10)/- (1)	some non-synonymous	45	L	L (10)/? (1)
1359278	puuD	765	gamma-Glu-GABA hydrolase	AAC74380.2	A	G (10)/- (1)	some non-synonymous	45	L	L (10)/? (1)
1359279	puuD	765	gamma-Glu-GABA hydrolase	AAC74380.2	C	C (10)/- (1)	some non-synonymous	46	P	P (10)/? (1)
1359280	puuD	765	gamma-Glu-GABA hydrolase	AAC74380.2	C	C (10)/- (1)	some non-synonymous	46	P	P (10)/? (1)
1359281	puuD	765	gamma-Glu-GABA hydrolase	AAC74380.2	A	A (10)/- (1)	some non-synonymous	46	P	P (10)/? (1)
1359282	puuD	765	gamma-Glu-GABA hydrolase	AAC74380.2	C	C (10)/- (1)	some non-synonymous	47	H	H (10)/? (1)
1359283	puuD	765	gamma-Glu-GABA hydrolase	AAC74380.2	A	A (10)/- (1)	some non-synonymous	47	H	H (10)/? (1)
1359415	puuD	765	gamma-Glu-GABA hydrolase	AAC74380.2	G	A (10)/G (1)	some non-synonymous	91	G	E (10)/G (1)
1360165	puuR	558	DNA-binding transcriptional repressor for the puu divergon	AAC74381.1	G	G (10)/A (1)	all synonymous	77	Q	Q (11)
1363084	puuB	1281	gamma-Glu-putrescine oxidase, FAD/NAD(P)-binding	AAC74383.1	T	G (8)/T (3)	some non-synonymous	277	C	G (8)/C (3)
1364482	puuE	1266	GABA aminotransferase, PLP-dependent	AAC74384.1	G	G (10)/A (1)	all synonymous	303	A	A (11)
1364554	puuE	1266	GABA aminotransferase, PLP-dependent	AAC74384.1	C	A (6)/G (5)	all synonymous	327	G	G (11)
1366833	pspB	225	DNA-binding transcriptional regulator of psp operon	AAC74387.1	G	G (10)/T (1)	all synonymous	3	A	A (11)
1373088	ycjQ	1053	putative oxidoreductase, Zn-dependent and NAD(P)-binding	AAC74395.1	C	T (10)/C (1)	all synonymous	34	G	G (11)
1373205	ycjQ	1053	putative oxidoreductase, Zn-dependent and NAD(P)-binding	AAC74395.1	C	C (10)/T (1)	all synonymous	73	G	G (11)
1378139	ycjT	2268	putative hydrolase	AAC74398.1	C	C (10)/T (1)	all synonymous	744	F	F (11)
1384530	ycjF	1062	inner membrane protein, UPF0283 family	AAC74404.1	C	C (10)/T (1)	all synonymous	332	F	F (11)
1396839	fnr	753	DNA-binding transcriptional dual regulator, global regulator of anaerobic growth	AAC74416.1	C	C (10)/T (1)	some non-synonymous	238	A	A (10)/T (1)
1396889	fnr	753	DNA-binding transcriptional dual regulator, global regulator of anaerobic growth	AAC74416.1	C	C (10)/T (1)	some non-synonymous	221	S	S (10)/N (1)
1399850	abgB	1446	p-aminobenzoyl-glutamate hydrolase, B subunit	AAC74419.1	G	G (10)/A (1)	some non-synonymous	477	P	P (10)/L (1)
1400847	abgB	1446	p-aminobenzoyl-glutamate hydrolase, B subunit	AAC74419.1	C	C (9)/T (2)	some non-synonymous	145	G	G (9)/S (2)
1403103	abgR	909	putative DNA-binding transcriptional regulator of abgABT operon	AAC74421.1	C	A (10)/C (1)	all synonymous	113	V	V (11)
1405000	ydaM	1233	diguanylate cyclase, csgD regulator	AAC74423.2	C	C (10)/T (1)	some non-synonymous	274	G	G (10)/S (1)
1407599	dbpA	1374	ATP-dependent RNA helicase, specific for 23S rRNA	AAC74425.1	G	G (10)/A (1)	some non-synonymous	22	G	G (10)/D (1)
1408196	dbpA	1374	ATP-dependent RNA helicase, specific for 23S rRNA	AAC74425.1	A	A (10)/G (1)	some non-synonymous	221	Y	Y (10)/C (1)
1408407	dbpA	1374	ATP-dependent RNA helicase, specific for 23S rRNA	AAC74425.1	C	C (10)/T (1)	all synonymous	291	S	S (11)
1409949	ttcA	936	tRNA 2-thiocytidine biosynthesis protein	AAC74426.1	T	T (6)/G (3)/C (2)	all synonymous	8	T	T (11)
1409950	ttcA	936	tRNA 2-thiocytidine biosynthesis protein	AAC74426.1	G	G (8)/C (3)	some non-synonymous	8	T	T (8)/R (3)
1409953	ttcA	936	tRNA 2-thiocytidine biosynthesis protein	AAC74426.1	A	A (9)/T (2)	some non-synonymous	7	I	I (9)/N (2)
1409955	ttcA	936	tRNA 2-thiocytidine biosynthesis protein	AAC74426.1	T	T (9)/C (2)	all synonymous	6	Q	Q (11)
1409957	ttcA	936	tRNA 2-thiocytidine biosynthesis protein	AAC74426.1	G	G (6)/C (3)/T (2)	some non-synonymous	6	Q	Q (6)/E (3)/K (2)
1409966	ttcA	936	tRNA 2-thiocytidine biosynthesis protein	AAC74426.1	C	C (8)/G (3)	some non-synonymous	3	E	E (8)/Q (3)
1409967	ttcA	936	tRNA 2-thiocytidine biosynthesis protein	AAC74426.1	T	T (8)/C (3)	all synonymous	2	Q	Q (11)
1409968	ttcA	936	tRNA 2-thiocytidine biosynthesis protein	AAC74426.1	T	T (8)/G (3)	some non-synonymous	2	Q	Q (8)/P (3)
1409969	ttcA	936	tRNA 2-thiocytidine biosynthesis protein	AAC74426.1	G	G (8)/A (3)	some non-synonymous	2	Q	Q (8)/* (3)
1435541	ydbK	3525	fused predicted pyruvate-flavodoxin oxidoreductase: conserved protein/conserved protein/FeS binding protein	AAC74460.1	C	C (10)/T (1)	some non-synonymous	1090	A	A (10)/T (1)
1436397	ydbK	3525	fused predicted pyruvate-flavodoxin oxidoreductase: conserved protein/conserved protein/FeS binding protein	AAC74460.1	A	G (10)/A (1)	all synonymous	804	R	R (11)
1437257	ydbK	3525	fused predicted pyruvate-flavodoxin oxidoreductase: conserved protein/conserved protein/FeS binding protein	AAC74460.1	C	T (6)/C (5)	some non-synonymous	518	A	T (6)/A (5)
1437682	ydbK	3525	fused predicted pyruvate-flavodoxin oxidoreductase: conserved protein/conserved protein/FeS binding protein	AAC74460.1	A	A (10)/C (1)	some non-synonymous	376	V	V (10)/G (1)
1472505	ydbC	861	putative oxidoreductase, NAD(P)-binding	AAC74488.1	G	G (10)/T (1)	all synonymous	87	A	A (11)
1473183	ydbD	2307	putative PF10971 family periplasmic methylglyoxal resistance protein	AAC74489.2	A	C (10)/A (1)	some non-synonymous	6	N	H (10)/N (1)
1473276	ydbD	2307	putative PF10971 family periplasmic methylglyoxal resistance protein	AAC74489.2	T	C (10)/A (1)	some non-synonymous	37	S	P (10)/T (1)
1474092	ydbD	2307	putative PF10971 family periplasmic methylglyoxal resistance protein	AAC74489.2	C	C (10)/T (1)	some non-synonymous	309	P	P (10)/S (1)
1477509	ynbC	1758	putative hydrolase	AAC74492.1	C	C (10)/T (1)	all synonymous	116	V	V (11)
1481108	hrpA	3903	putative ATP-dependent helicase	AAC74495.2	C	T (10)/C (1)	all synonymous	8	T	T (11)
1481375	hrpA	3903	putative ATP-dependent helicase	AAC74495.2	C	A (10)/C (1)	all synonymous	97	I	I (11)
1484966	hrpA	3903	putative ATP-dependent helicase	AAC74495.2	G	G (10)/A (1)	all synonymous	1294	A	A (11)
1492112	trg	1641	methyl-accepting chemotaxis protein III, ribose and galactose sensor receptor	AAC74503.1	C	C (10)/T (1)	some non-synonymous	540	P	P (10)/L (1)
1493355	ydcJ	1344	putative metalloenzyme	AAC74505.1	C	C (10)/T (1)	some non-synonymous	15	S	S (10)/L (1)
1494541	ydcJ	1344	putative metalloenzyme	AAC74505.1	C	C (10)/A (1)	some non-synonymous	410	H	H (10)/Q (1)
1494968	opgD	1656	osmoregulated periplasmic glucan (OPG) biosynthesis periplasmic protein	AAC74506.3	C	C (10)/T (1)	some non-synonymous	30	A	A (10)/V (1)
1495269	opgD	1656	osmoregulated periplasmic glucan (OPG) biosynthesis periplasmic protein	AAC74506.3	A	A (10)/T (1)	some non-synonymous	130	E	E (10)/D (1)
1497618	ydcK	981	putative enzyme	AAC74510.1	G	G (10)/A (1)	some non-synonymous	286	H	H (10)/Y (1)
1498959	tehA	993	potassium-tellurite ethidium and proflavin transporter	AAC74511.1	C	C (10)/T (1)	all synonymous	121	A	A (11)
1504570	ydcN	537	putative DNA-binding transcriptional regulator	AAC74516.1	C	C (10)/T (1)	all synonymous	125	V	V (11)
1507894	hicB	417	antitoxin for the HicAB toxin-antitoxin system	AAC74520.2	C	A (8)/C (3)	all synonymous	121	A	A (11)
1512311	ydcU	942	putative spermidine/putrescine transporter subunit	AAC74524.1	G	G (6)/A (5)	some non-synonymous	153	A	A (6)/T (5)
1515437	ydcX	174	conserved protein, DUF2566 family	AAC74527.2	G	G (6)/T (5)	some non-synonymous	9	V	V (6)/F (5)
1516162	ydcZ	450	inner membrane protein, DUF606 family	AAC74529.1	A	A (10)/T (1)	some non-synonymous	65	L	L (10)/Q (1)
1516292	ydcZ	450	inner membrane protein, DUF606 family	AAC74529.1	T	A (10)/T (1)	some non-synonymous	22	T	S (10)/T (1)
1523825	ansP	1500	L-asparagine transporter	AAC74535.2	C	A (10)/C (1)	all synonymous	60	G	G (11)
1533453	yddE	894	conserved predicted enzyme, PhzC-PhzF family	AAC74546.1	T	T (10)/A (1)	some non-synonymous	144	T	T (10)/S (1)
1533879	yddE	894	conserved predicted enzyme, PhzC-PhzF family	AAC74546.1	T	T (10)/C (1)	some non-synonymous	2	K	K (10)/E (1)
1537047	narZ	3741	nitrate reductase 2 (NRZ), alpha subunit	AAC74550.1	C	T (10)/C (1)	some non-synonymous	1190	V	I (10)/V (1)
1538864	narZ	3741	nitrate reductase 2 (NRZ), alpha subunit	AAC74550.1	C	C (10)/T (1)	some non-synonymous	584	R	R (10)/H (1)
1538956	narZ	3741	nitrate reductase 2 (NRZ), alpha subunit	AAC74550.1	G	G (10)/A (1)	all synonymous	553	N	N (11)
1539149	narZ	3741	nitrate reductase 2 (NRZ), alpha subunit	AAC74550.1	T	T (10)/G (1)	some non-synonymous	489	D	D (10)/A (1)
1539247	narZ	3741	nitrate reductase 2 (NRZ), alpha subunit	AAC74550.1	G	G (6)/A (5)	all synonymous	456	P	P (11)
1540941	narU	1389	nitrate/nitrite transporter	AAD13433.1	C	T (10)/C (1)	some non-synonymous	382	V	I (10)/V (1)
1548744	fdnH	885	formate dehydrogenase-N, Fe-S (beta) subunit, nitrate-inducible	AAD13439.1	A	A (10)/G (1)	some non-synonymous	87	Q	Q (10)/R (1)
1551441	adhP	1011	ethanol-active dehydrogenase/acetaldehyde-active reductase	AAC74551.2	C	C (10)/T (1)	some non-synonymous	141	S	S (10)/N (1)
1552601	maeA	1698	malate dehydrogenase, (decarboxylating, NAD-requiring) (malic enzyme)	AAC74552.2	A	T (10)/A (1)	some non-synonymous	365	W	R (10)/W (1)
1556428	ddpD	987	D,D-dipeptide permease system, ATP-binding component	AAC74557.1	G	T (10)/G (1)	some non-synonymous	205	A	D (10)/A (1)
1557282	ddpC	897	D-ala-D-ala transporter subunit	AAC74558.1	G	G (10)/A (1)	some non-synonymous	218	A	A (10)/V (1)
1558915	ddpB	1023	D-ala-D-ala transporter subunit	AAC74559.1	C	C (6)/- (5)	some non-synonymous	13	G	G (6)/? (5)
1560086	ddpA	1551	D-ala-D-a la transporter subunit	AAC74560.1	A	A (10)/- (1)	some non-synonymous	140	I	I (10)/? (1)
1568503	gadC	1536	glutamate:gamma-aminobutyric acid antiporter	AAC74565.1	G	A (10)/G (1)	some non-synonymous	4	S	L (10)/S (1)
1572222	pqqL	2796	putative peptidase	AAC74567.1	G	G (10)/A (1)	all synonymous	335	R	R (11)
1574557	yddB	2373	putative porin protein	AAC74568.1	C	C (10)/T (1)	some non-synonymous	363	D	D (10)/N (1)
1576842	yddA	1686	fused predicted multidrug transporter subunits of ABC superfamily: membrane component/ATP-binding component	AAC74569.1	G	G (6)/A (5)	all synonymous	175	S	S (11)
1579077	ydeN	1683	hypothetical protein	AAC74571.2	G	G (10)/T (1)	some non-synonymous	491	S	S (10)/* (1)
1581139	ydeO	762	UV-inducible global regulator, EvgA-, GadE-dependent	AAC74572.1	T	T (10)/G (1)	some non-synonymous	191	K	K (10)/N (1)
1586270	ydeR	504	putative fimbrial-like adhesin protein	AAC74576.1	G	T (10)/G (1)	some non-synonymous	17	F	L (10)/F (1)
1599697	lsrA	1536	autoinducer 2 import ATP-binding protein	AAC74586.1	C	T (10)/C (1)	some non-synonymous	62	P	S (10)/P (1)
1600537	lsrA	1536	autoinducer 2 import ATP-binding protein	AAC74586.1	T	T (10)/C (1)	some non-synonymous	342	Y	Y (10)/H (1)
1600672	lsrA	1536	autoinducer 2 import ATP-binding protein	AAC74586.1	C	C (10)/T (1)	some non-synonymous	387	R	R (10)/C (1)
1600858	lsrA	1536	autoinducer 2 import ATP-binding protein	AAC74586.1	A	A (10)/C (1)	some non-synonymous	449	I	I (10)/L (1)
1603311	lsrB	1023	autoinducer 2-binding protein	AAC74589.1	C	C (10)/T (1)	all synonymous	79	N	N (11)
1608545	uxaB	1452	altronate oxidoreductase, NAD-dependent	AAT48131.1	T	T (10)/G (1)	some non-synonymous	54	I	I (10)/L (1)
1610074	yneG	360	hypothetical protein	AAC74596.1	C	A (10)/C (1)	some non-synonymous	92	Q	H (10)/Q (1)
1610080	yneG	360	hypothetical protein	AAC74596.1	A	G (10)/A (1)	all synonymous	90	I	I (11)
1611835	sad	1389	succinate semialdehyde dehydrogenase, NAD(P)+-dependent	AAC74598.2	C	T (10)/C (1)	some non-synonymous	298	G	D (10)/G (1)
1611918	sad	1389	succinate semialdehyde dehydrogenase, NAD(P)+-dependent	AAC74598.2	C	C (10)/T (1)	all synonymous	270	A	A (11)
1611972	sad	1389	succinate semialdehyde dehydrogenase, NAD(P)+-dependent	AAC74598.2	C	T (10)/C (1)	all synonymous	252	A	A (11)
1613620	yneJ	882	putative DNA-binding transcriptional regulator	AAC74599.1	G	G (10)/C (1)	some non-synonymous	265	V	V (10)/L (1)
1616130	ydeA	1191	arabinose efflux transporter, arabinose-inducible	AAC74601.1	G	G (10)/T (1)	some non-synonymous	360	W	W (10)/L (1)
1616275	marC	666	inner membrane protein, UPF0056 family	AAC74602.1	A	T (10)/A (1)	some non-synonymous	220	Y	N (10)/Y (1)
1617393	marR	435	DNA-binding transcriptional repressor of multiple antibiotic resistance	AAC74603.2	G	G (10)/A (1)	some non-synonymous	84	V	V (10)/M (1)
1621691	ydeH	891	diguanylate cyclase, required for pgaD induction	AAC74608.1	C	T (10)/C (1)	some non-synonymous	62	G	R (10)/G (1)
1622159	ydeI	393	hypothetical protein	AAC74609.1	G	A (8)/G (3)	all synonymous	121	A	A (11)
1628526	ydfI	1461	putative D-mannonate oxidoreductase, NAD-dependent	AAC74615.1	A	A (10)/G (1)	all synonymous	138	L	L (11)
1653427	ynfA	327	inner membrane protein, UPF0060 family	AAC74654.1	C	G (10)/C (1)	some non-synonymous	91	A	P (10)/A (1)
1654759	speG	561	spermidine N1-acetyltransferase	AAC74656.1	C	C (10)/A (1)	all synonymous	184	T	T (11)
1656486	ynfE	2427	putative selenate reductase, periplasmic	AAC74659.1	T	T (10)/C (1)	some non-synonymous	132	W	W (10)/R (1)
1657658	ynfE	2427	putative selenate reductase, periplasmic	AAC74659.1	C	C (10)/T (1)	all synonymous	522	T	T (11)
1661918	ynfH	855	oxidoreductase, membrane subunit	AAC74662.1	G	G (10)/A (1)	some non-synonymous	96	V	V (10)/I (1)
1663864	clcB	1257	H(+)/Cl(-) exchange transporter	AAC74664.2	G	G (10)/A (1)	some non-synonymous	176	G	G (10)/S (1)
1665620	mlc	1221	global DNA-binding transcriptional repressor; autorepressor; required for anaerobic growth on glucosamine	AAC74666.1	C	C (10)/T (1)	all synonymous	323	G	G (11)
1665701	mlc	1221	global DNA-binding transcriptional repressor; autorepressor; required for anaerobic growth on glucosamine	AAC74666.1	G	G (10)/A (1)	all synonymous	296	T	T (11)
1666477	mlc	1221	global DNA-binding transcriptional repressor; autorepressor; required for anaerobic growth on glucosamine	AAC74666.1	G	G (10)/A (1)	some non-synonymous	38	R	R (10)/C (1)
1668429	ynfM	1254	putative arabinose efflux transporter	AAC74668.1	G	G (10)/A (1)	some non-synonymous	236	R	R (10)/H (1)
1675888	pntA	1533	pyridine nucleotide transhydrogenase, alpha subunit	AAC74675.1	T	G (10)/T (1)	some non-synonymous	14	T	P (10)/T (1)
1676798	ydgH	945	hypothetical protein	AAC74676.1	T	T (10)/G (1)	all synonymous	116	V	V (11)
1679653	folM	723	dihydromonapterin reductase, NADPH-dependent; dihydrofolate reductase isozyme	AAC74678.1	T	T (10)/- (1)	some non-synonymous	218	D	D (10)/? (1)
1679654	folM	723	dihydromonapterin reductase, NADPH-dependent; dihydrofolate reductase isozyme	AAC74678.1	T	T (10)/- (1)	some non-synonymous	219	Y	Y (10)/? (1)
1679655	folM	723	dihydromonapterin reductase, NADPH-dependent; dihydrofolate reductase isozyme	AAC74678.1	A	A (10)/- (1)	some non-synonymous	219	Y	Y (10)/? (1)
1679656	folM	723	dihydromonapterin reductase, NADPH-dependent; dihydrofolate reductase isozyme	AAC74678.1	C	C (10)/- (1)	some non-synonymous	219	Y	Y (10)/? (1)
1688361	ydgA	1509	conserved protein, DUF945 family	AAC74686.1	G	A (10)/G (1)	all synonymous	162	L	L (11)
1688365	ydgA	1509	conserved protein, DUF945 family	AAC74686.1	T	T (10)/C (1)	some non-synonymous	164	Y	Y (10)/H (1)
1688594	ydgA	1509	conserved protein, DUF945 family	AAC74686.1	A	A (10)/T (1)	some non-synonymous	240	E	E (10)/V (1)
1692152	uidB	1374	glucuronide transporter	AAC74688.1	C	C (10)/A (1)	some non-synonymous	46	A	A (10)/S (1)
1695507	hdhA	768	7-alpha-hydroxysteroid dehydrogenase, NAD-dependent	AAC74691.1	G	G (10)/A (1)	all synonymous	186	G	G (11)
1696907	malI	1029	transcriptional repressor of Mal regulon	AAC74692.1	G	G (10)/C (1)	some non-synonymous	100	L	L (10)/V (1)
1701773	ydgJ	1041	putative oxidoreductase	AAC74696.2	G	G (10)/A (1)	some non-synonymous	187	T	T (10)/M (1)
1704333	rsxA	582	electron transport complex protein required for the reduction of SoxR	AAC74699.1	T	T (10)/C (1)	all synonymous	181	S	S (11)
1707822	rsxD	1059	electron transport complex protein required for the reduction of SoxR; predicted membrane protein	AAC74702.1	T	T (10)/C (1)	all synonymous	219	G	G (11)
1709850	nth	636	DNA glycosylase and apyrimidinic (AP) lyase (endonuclease III)	AAC74705.1	G	A (10)/G (1)	some non-synonymous	102	G	S (10)/G (1)
1711411	dtpA	1503	dipeptide and tripeptide permease A	AAC74706.1	T	T (10)/A (1)	some non-synonymous	207	Y	Y (10)/N (1)
1713251	pdxY	864	pyridoxamine kinase	AAC74708.1	A	A (10)/T (1)	all synonymous	221	G	G (11)
1713884	pdxY	864	pyridoxamine kinase	AAC74708.1	A	A (10)/C (1)	all synonymous	10	S	S (11)
1714880	tyrS	1275	tyrosyl-tRNA synthetase	AAC74709.1	C	C (10)/T (1)	some non-synonymous	123	A	A (10)/T (1)
1716297	mliC	330	inhibitor of c-type lysozyme, membrane-bound; predicted lipoprotein	AAC74711.2	C	C (10)/T (1)	all synonymous	41	P	P (11)
1716818	anmK	1110	anhydro-N-acetylmuramic acid kinase	AAC74712.1	A	A (10)/T (1)	some non-synonymous	270	L	L (10)/Q (1)
1718450	slyA	435	DNA-binding transcriptional activator	AAC74714.2	A	T (6)/A (5)	all synonymous	133	L	L (11)
1719547	ydhJ	858	putative membrane fusion protein (MFP) of YdhJK efflux pump	AAC74716.2	C	C (10)/T (1)	some non-synonymous	87	A	A (10)/V (1)
1721690	ydhK	2013	putative efflux protein (PET) component of YdhJK efflux pump	AAC74717.1	G	G (10)/A (1)	some non-synonymous	516	A	A (10)/T (1)
1721861	ydhK	2013	putative efflux protein (PET) component of YdhJK efflux pump	AAC74717.1	G	A (10)/G (1)	some non-synonymous	573	V	I (10)/V (1)
1724585	nemR	600	transcriptional repressor for the nem operon, NEM-inactivated	AAC74721.3	T	C (10)/A (1)	some non-synonymous	180	F	S (10)/Y (1)
1725176	nemA	1098	N-ethylmaleimide reductase, FMN-linked	AAC74722.1	G	G (10)/A (1)	some non-synonymous	165	R	R (10)/H (1)
1726598	rnt	648	ribonuclease T (RNase T)	AAC74724.1	C	T (10)/C (1)	all synonymous	76	A	A (11)
1729198	lhr	4617	putative ATP-dependent helicase	AAC74725.1	C	T (9)/C (2)	all synonymous	696	D	D (11)
1732624	ydhO	816	putative peptidase, C40 clan	AAC74727.1	A	A (10)/C (1)	some non-synonymous	56	T	T (10)/P (1)
1732768	ydhO	816	putative peptidase, C40 clan	AAC74727.1	T	C (6)/T (5)	some non-synonymous	104	F	L (6)/F (5)
1734447	ydhP	1170	putative transporter	AAC74729.1	C	T (10)/C (1)	some non-synonymous	290	E	K (10)/E (1)
1736062	purR	1026	DNA-binding transcriptional repressor, hypoxanthine-binding	AAC74730.1	G	A (10)/G (1)	all synonymous	65	L	L (11)
1738558	ydhC	1212	putative arabinose efflux transporter	AAT48135.1	C	T (10)/C (1)	all synonymous	208	N	N (11)
1740642	ribC	642	riboflavin synthase, alpha subunit	AAC74734.1	G	A (9)/G (2)	some non-synonymous	209	P	S (9)/P (2)
1741516	mdtK	1374	multidrug efflux system transporter	AAT48136.1	A	G (6)/A (5)	all synonymous	12	L	L (11)
1742805	mdtK	1374	multidrug efflux system transporter	AAT48136.1	T	A (10)/T (1)	some non-synonymous	442	F	Y (10)/F (1)
1743239	ydhQ	1257	hypothetical protein	AAC74736.1	T	T (10)/G (1)	some non-synonymous	305	I	I (10)/L (1)
1744119	ydhQ	1257	hypothetical protein	AAC74736.1	G	G (10)/A (1)	all synonymous	11	D	D (11)
1745231	ydhS	1605	conserved protein with FAD/NAD(P)-binding domain	AAC74738.1	C	C (10)/T (1)	some non-synonymous	26	P	P (10)/L (1)
1745333	ydhS	1605	conserved protein with FAD/NAD(P)-binding domain	AAC74738.1	T	T (10)/A (1)	some non-synonymous	60	I	I (10)/N (1)
1746521	ydhS	1605	conserved protein with FAD/NAD(P)-binding domain	AAC74738.1	C	C (10)/T (1)	some non-synonymous	456	P	P (10)/L (1)
1749201	ydhW	648	hypothetical protein	AAC74742.1	G	G (10)/A (1)	some non-synonymous	183	S	S (10)/L (1)
1749329	ydhW	648	hypothetical protein	AAC74742.1	A	A (10)/T (1)	some non-synonymous	140	Y	Y (10)/* (1)
1749800[+1]	ydhV	2103	putative oxidoreductase	AAC74743.1	-	- (10)/A (1)	some non-synonymous	685	L	L (1)/? (10)
1750513	ydhV	2103	putative oxidoreductase	AAC74743.1	G	A (10)/G (1)	some non-synonymous	448	R	C (10)/R (1)
1754843	pykF	1413	pyruvate kinase I	AAC74746.1	C	C (10)/T (1)	all synonymous	374	I	I (11)
1761426	sufB	1488	component of SufBCD Fe-S cluster assembly scaffold	AAC74753.2	G	A (9)/G (2)	some non-synonymous	203	A	V (9)/A (2)
1766548	ydiJ	3057	putative FAD-linked oxidoreductase	AAC74757.1	C	T (10)/C (1)	all synonymous	54	A	A (11)
1768139	ydiK	1113	inner membrane protein, UPF0118 family	AAC74758.1	G	G (10)/A (1)	some non-synonymous	348	V	V (10)/I (1)
1769109	ydiM	1215	inner membrane protein, predicted transporter	AAC74760.1	T	T (10)/C (1)	all synonymous	5	Y	Y (11)
1769953	ydiM	1215	inner membrane protein, predicted transporter	AAC74760.1	A	A (10)/G (1)	some non-synonymous	287	I	I (10)/V (1)
1770232	ydiM	1215	inner membrane protein, predicted transporter	AAC74760.1	G	G (10)/A (1)	some non-synonymous	380	A	A (10)/T (1)
1771347	ydiN	1266	inner membrane protein, predicted MFS superfamily transporter	AAC74761.4	C	C (10)/T (1)	some non-synonymous	271	A	A (10)/V (1)
1771733	ydiN	1266	inner membrane protein, predicted MFS superfamily transporter	AAC74761.4	G	G (6)/A (5)	some non-synonymous	400	E	E (6)/K (5)
1773668	ydiF	1596	fused predicted acetyl-CoA:acetoacetyl-CoA transferase: alpha subunit/beta subunit	AAC74764.1	G	G (10)/A (1)	some non-synonymous	20	E	E (10)/K (1)
1774144	ydiF	1596	fused predicted acetyl-CoA:acetoacetyl-CoA transferase: alpha subunit/beta subunit	AAC74764.1	G	A (8)/G (3)	all synonymous	178	A	A (11)
1774922	ydiF	1596	fused predicted acetyl-CoA:acetoacetyl-CoA transferase: alpha subunit/beta subunit	AAC74764.1	G	G (10)/A (1)	some non-synonymous	438	G	G (10)/R (1)
1776891	ydiP	912	putative DNA-binding transcriptional regulator	AAC74766.1	T	T (10)/C (1)	all synonymous	145	Q	Q (11)
1779036	ydiR	939	putative electron transfer flavoprotein, FAD-binding subunit	AAC74768.1	G	G (10)/A (1)	all synonymous	204	L	L (11)
1782542	fadK	1647	short chain acyl-CoA synthetase, anaerobic	AAC74771.2	T	T (10)/- (1)	some non-synonymous	496	A	A (10)/? (1)
1784193	ppsA	2379	phosphoenolpyruvate synthase	AAC74772.1	C	C (10)/T (1)	some non-synonymous	315	R	R (10)/H (1)
1784312	ppsA	2379	phosphoenolpyruvate synthase	AAC74772.1	G	A (10)/G (1)	all synonymous	275	H	H (11)
1785076	ppsA	2379	phosphoenolpyruvate synthase	AAC74772.1	C	C (10)/T (1)	some non-synonymous	21	V	V (10)/I (1)
1788391	ydiU	1437	conserved protein, UPF0061 family	AAC74776.1	T	A (10)/T (1)	some non-synonymous	293	N	I (10)/N (1)
1789601	ydiV	714	anti-FlhD4C2 factor, inactive EAL family phosphodiesterase	AAC74777.1	A	G (10)/A (1)	all synonymous	148	N	N (11)
1791776	btuE	552	glutathione peroxidase	AAC74780.1	C	C (10)/T (1)	some non-synonymous	120	A	A (10)/T (1)
1792333	btuC	981	vitamin B12 transporter subunit: membrane component of ABC superfamily	AAC74781.1	C	C (10)/A (1)	some non-synonymous	282	A	A (10)/S (1)
1794480	pheT	2388	phenylalanine tRNA synthetase, beta subunit	AAC74783.1	G	G (10)/T (1)	some non-synonymous	497	R	R (10)/S (1)
1794843	pheT	2388	phenylalanine tRNA synthetase, beta subunit	AAC74783.1	C	C (10)/T (1)	some non-synonymous	376	A	A (10)/T (1)
1803367	ydiY	759	putative outer membrane protein, acid-inducible	AAC74792.1	C	C (6)/T (5)	all synonymous	247	S	S (11)
1806674	yniA	861	putative phosphotransferase/kinase	AAC74795.1	A	T (10)/A (1)	all synonymous	285	A	A (11)
1806730	yniB	537	putative inner membrane protein	AAC74796.1	C	C (8)/T (3)	all synonymous	176	G	G (11)
1809080	ydjN	1392	putative transporter	AAC74799.1	G	G (10)/A (1)	all synonymous	41	V	V (11)
1809415	ydjN	1392	putative transporter	AAC74799.1	A	A (6)/T (5)	some non-synonymous	153	N	N (6)/I (5)
1814979	chbG	750	chito-oligosaccharide deacetylase	AAC74803.1	G	T (10)/G (1)	some non-synonymous	61	H	N (10)/H (1)
1815314	chbF	1353	phospho-chitobiase; general 6-phospho-beta-glucosidase activity	AAC74804.1	T	T (10)/C (1)	some non-synonymous	404	D	D (10)/G (1)
1815555	chbF	1353	phospho-chitobiase; general 6-phospho-beta-glucosidase activity	AAC74804.1	C	C (10)/T (1)	some non-synonymous	324	V	V (10)/M (1)
1817730	chbA	351	N,N'-diacetylchitobiose-specific enzyme IIA component of PTS	AAC74806.1	G	A (6)/G (5)	all synonymous	34	L	L (11)
1818019	chbC	1359	N,N'-diacetylchitobiose-specific enzyme IIC component of PTS	AAC74807.1	G	A (10)/G (1)	some non-synonymous	407	A	V (10)/A (1)
1819064	chbC	1359	N,N'-diacetylchitobiose-specific enzyme IIC component of PTS	AAC74807.1	A	A (10)/C (1)	some non-synonymous	59	S	S (10)/A (1)
1820101	osmE	339	DNA-binding transcriptional activator	AAC74809.1	G	G (10)/A (1)	all synonymous	60	S	S (11)
1822290	cho	888	endonuclease of nucleotide excision repair	AAC74811.1	T	T (10)/A (1)	some non-synonymous	251	L	L (10)/Q (1)
1825222	astB	1344	succinylarginine dihydrolase	AAC74815.1	A	C (6)/A (5)	all synonymous	354	R	R (11)
1825885	astB	1344	succinylarginine dihydrolase	AAC74815.1	G	G (10)/A (1)	all synonymous	133	N	N (11)
1826132	astB	1344	succinylarginine dihydrolase	AAC74815.1	G	G (10)/T (1)	some non-synonymous	51	A	A (10)/D (1)
1827997	astA	1035	arginine succinyltransferase	AAC74817.1	G	G (10)/A (1)	some non-synonymous	265	R	R (10)/C (1)
1831570	ydjX	711	inner membrane protein, TVP38/TMEM64 family	AAC74820.2	G	G (10)/A (1)	some non-synonymous	49	S	S (10)/N (1)
1836607	ynjC	1536	putative inner membrane ABC transporter permease, function unknown	AAC74825.2	C	C (10)/A (1)	some non-synonymous	458	R	R (10)/S (1)
1837095	ynjD	654	putative transporter subunit: ATP-binding component of ABC superfamily	AAC74826.1	G	G (10)/A (1)	some non-synonymous	109	A	A (10)/T (1)
1838970	ynjF	621	inner membrane protein, phosphatidylglycerophosphate synthase homolog	AAC74828.2	C	C (10)/- (1)	some non-synonymous	153	G	G (10)/? (1)
1840700	gdhA	1344	glutamate dehydrogenase, NADP-specific	AAC74831.1	C	C (10)/T (1)	all synonymous	102	N	N (11)
1842619	ynjI	1041	inner membrane protein	AAC74832.2	C	C (10)/T (1)	some non-synonymous	93	A	A (10)/T (1)
1843360	topB	1962	DNA topoisomerase III	AAC74833.1	G	A (10)/G (1)	some non-synonymous	542	T	I (10)/T (1)
1845106	selD	1044	selenophosphate synthase	AAC74834.1	G	G (10)/A (1)	all synonymous	309	V	V (11)
1845454	selD	1044	selenophosphate synthase	AAC74834.1	C	C (10)/T (1)	all synonymous	193	L	L (11)
1845530	selD	1044	selenophosphate synthase	AAC74834.1	G	G (10)/A (1)	some non-synonymous	168	A	A (10)/V (1)
1847770	sppA	1857	protease IV (signal peptide peptidase)	AAC74836.1	A	G (10)/A (1)	some non-synonymous	304	T	A (10)/T (1)
1848485	sppA	1857	protease IV (signal peptide peptidase)	AAC74836.1	T	C (10)/T (1)	some non-synonymous	542	V	A (10)/V (1)
1850231	pncA	642	nicotinamidase/pyrazinamidase	AAC74838.2	G	G (10)/T (1)	all synonymous	107	A	A (11)
1850277	pncA	642	nicotinamidase/pyrazinamidase	AAC74838.2	T	T (10)/C (1)	some non-synonymous	123	F	F (10)/L (1)
1850446	pncA	642	nicotinamidase/pyrazinamidase	AAC74838.2	G	G (10)/A (1)	some non-synonymous	179	R	R (10)/H (1)
1858301	ydjL	1077	putative oxidoreductase, Zn-dependent and NAD(P)-binding	AAC74846.1	C	C (10)/T (1)	some non-synonymous	352	M	M (10)/I (1)
1863454	yeaE	855	aldo-keto reductase, methylglyoxal to acetol, NADPH-dependent	AAC74851.1	G	G (10)/A (1)	all synonymous	69	T	T (11)
1863926	mipA	747	scaffolding protein for murein synthesizing machinery	AAC74852.1	G	A (10)/G (1)	some non-synonymous	191	P	S (10)/P (1)
1866545	yeaG	1935	protein kinase, function unknown; autokinase	AAC74853.1	G	G (10)/A (1)	all synonymous	538	E	E (11)
1869595	yeaI	1476	putative membrane-anchored diguanylate cyclase	AAC74855.1	G	G (10)/A (1)	some non-synonymous	396	R	R (10)/H (1)
1873194	yeaM	822	putative DNA-binding transcriptional regulator	AAC74860.1	T	T (10)/A (1)	some non-synonymous	136	Q	Q (10)/L (1)
1873869	yeaN	1182	putative transporter	AAC74861.1	C	C (10)/A (1)	some non-synonymous	58	P	P (10)/Q (1)
1874140	yeaN	1182	putative transporter	AAC74861.1	A	G (10)/T (1)	all synonymous	148	A	A (11)
1875985	yeaP	1026	diguanylate cyclase	AAC74864.2	G	G (10)/A (1)	some non-synonymous	83	E	E (10)/K (1)
1876585	yeaP	1026	diguanylate cyclase	AAC74864.2	G	T (8)/G (3)	some non-synonymous	283	E	* (8)/E (3)
1879242	dmlR	924	DNA-binding transcriptional activator for dmlA	AAC74869.2	G	G (10)/A (1)	some non-synonymous	198	R	R (10)/C (1)
1881366	yeaV	1446	putative transporter	AAC74871.1	T	T (10)/G (1)	some non-synonymous	52	V	V (10)/G (1)
1884241	yeaX	966	putative oxidoreductase	AAC74873.1	A	C (6)/A (5)	some non-synonymous	125	T	P (6)/T (5)
1884384	yeaX	966	putative oxidoreductase	AAC74873.1	T	A (8)/T (3)	some non-synonymous	172	H	Q (8)/H (3)
1884390	yeaX	966	putative oxidoreductase	AAC74873.1	A	G (8)/A (3)	all synonymous	174	S	S (11)
1884688	yeaX	966	putative oxidoreductase	AAC74873.1	G	G (10)/A (1)	some non-synonymous	274	V	V (10)/I (1)
1884738	yeaX	966	putative oxidoreductase	AAC74873.1	G	G (10)/A (1)	all synonymous	290	R	R (11)
1884740	yeaX	966	putative oxidoreductase	AAC74873.1	A	A (10)/C (1)	some non-synonymous	291	D	D (10)/A (1)
1886310	fadD	1686	acyl-CoA synthetase (long-chain-fatty-acid--CoA ligase)	AAC74875.1	G	A (10)/G (1)	all synonymous	487	G	G (11)
1886573	fadD	1686	acyl-CoA synthetase (long-chain-fatty-acid--CoA ligase)	AAC74875.1	G	A (10)/G (1)	some non-synonymous	400	P	S (10)/P (1)
1889157	tsaB	696	tRNA(ANN) t(6)A37 threonylcarbamoyladenosine modification protein; binding partner and protease for TsaD	AAC74877.1	G	G (10)/A (1)	all synonymous	45	I	I (11)
1890057	yoaA	1911	conserved protein with nucleoside triphosphate hydrolase domain	AAC74878.1	C	T (10)/C (1)	all synonymous	401	V	V (11)
1893347	pabB	1362	aminodeoxychorismate synthase, subunit I	AAC74882.1	G	A (9)/G (2)	all synonymous	173	S	S (11)
1893888	pabB	1362	aminodeoxychorismate synthase, subunit I	AAC74882.1	G	G (10)/T (1)	some non-synonymous	354	A	A (10)/S (1)
1894100	pabB	1362	aminodeoxychorismate synthase, subunit I	AAC74882.1	C	A (10)/C (1)	all synonymous	424	G	G (11)
1894511	nudL	579	putative NUDIX hydrolase	AAC74883.1	C	C (10)/T (1)	all synonymous	106	S	S (11)
1894641	nudL	579	putative NUDIX hydrolase	AAC74883.1	C	C (10)/T (1)	some non-synonymous	150	H	H (10)/Y (1)
1896003	sdaA	1365	L-serine deaminase I	AAC74884.1	G	G (10)/A (1)	some non-synonymous	350	A	A (10)/T (1)
1898415	yoaE	1557	fused predicted membrane protein/conserved protein	AAC74886.1	T	T (10)/C (1)	some non-synonymous	399	T	T (10)/A (1)
1899013	yoaE	1557	fused predicted membrane protein/conserved protein	AAC74886.1	A	A (10)/G (1)	all synonymous	199	S	S (11)
1902198	manZ	852	mannose-specific enzyme IID component of PTS	AAC74889.2	G	G (10)/T (1)	some non-synonymous	94	A	A (10)/S (1)
1904323	rlmA	810	23S rRNA m(1)G745 methyltransferase, SAM-dependent	AAC74892.1	G	G (10)/T (1)	some non-synonymous	254	F	F (10)/L (1)
1908878	yebQ	1374	putative transporter	AAC74898.2	C	C (10)/T (1)	all synonymous	193	P	P (11)
1913848	msrC	498	free methionine-(R)-sulfoxide reductase	AAC74902.2	G	G (10)/A (1)	some non-synonymous	102	A	A (10)/V (1)
1917805	yebT	2634	hypothetical protein	AAC74904.2	G	T (10)/G (1)	some non-synonymous	758	G	C (10)/G (1)
1922281	yebZ	873	inner membrane protein	AAC74910.1	G	G (10)/T (1)	some non-synonymous	112	P	P (10)/Q (1)
1923699	yobB	657	hypothetical protein	AAC74913.1	C	C (10)/T (1)	some non-synonymous	79	T	T (10)/I (1)
1924256	exoX	663	exodeoxyribonuclease 10; DNA exonuclease X	AAC74914.1	G	A (10)/G (1)	some non-synonymous	38	R	H (10)/R (1)
1924635	exoX	663	exodeoxyribonuclease 10; DNA exonuclease X	AAC74914.1	C	A (10)/G (1)	some non-synonymous	164	I	I (10)/M (1)
1927276	yebE	660	inner membrane protein, DUF533 family	AAC74916.1	C	C (10)/A (1)	all synonymous	152	L	L (11)
1928491	yebG	291	conserved protein regulated by LexA	AAC74918.1	T	T (10)/C (1)	some non-synonymous	94	H	H (10)/R (1)
1932436	edd	1812	6-phosphogluconate dehydratase	AAC74921.1	G	G (10)/A (1)	some non-synonymous	65	R	R (10)/C (1)
1939228	yebA	1323	putative peptidase	AAC74926.2	G	G (10)/T (1)	all synonymous	144	T	T (11)
1939767	znuA	933	zinc transporter subunit: periplasmic-binding component of ABC superfamily	AAC74927.2	G	A (10)/G (1)	all synonymous	281	L	L (11)
1940904	znuC	756	zinc transporter subunit: ATP-binding component of ABC superfamily	AAC74928.1	G	G (10)/A (1)	all synonymous	73	P	P (11)
1945254	ruvC	522	component of RuvABC resolvasome, endonuclease	AAC74933.1	A	A (10)/G (1)	all synonymous	49	Y	Y (11)
1946542	nudB	453	dihydroneopterin triphosphate pyrophosphatase	AAC74935.1	C	C (10)/T (1)	some non-synonymous	39	V	V (10)/I (1)
1947583	aspS	1773	aspartyl-tRNA synthetase	AAC74936.1	G	A (8)/G (3)	some non-synonymous	322	R	C (8)/R (3)
1947743	aspS	1773	aspartyl-tRNA synthetase	AAC74936.1	C	T (10)/C (1)	all synonymous	268	P	P (11)
1954248	torZ	2430	trimethylamine N-oxide reductase system III, catalytic subunit	AAC74942.2	C	A (10)/C (1)	some non-synonymous	262	D	Y (10)/D (1)
1956084	torY	1101	TMAO reductase III (TorYZ), cytochrome c-type subunit	AAC74943.1	G	T (10)/G (1)	some non-synonymous	25	L	M (10)/L (1)
1960325	yecT	489	hypothetical protein	AAC74947.2	A	A (10)/C (1)	some non-synonymous	110	E	E (10)/D (1)
1965276	cheY	390	chemotaxis regulator transmitting signal to flagellar motor component	AAC74952.1	A	G (10)/A (1)	all synonymous	62	N	N (11)
1968034	tap	1602	methyl-accepting protein IV	AAC74955.1	C	A (10)/C (1)	all synonymous	325	L	L (11)
1970193	tar	1662	methyl-accepting chemotaxis protein II	AAC74956.1	G	G (10)/C (1)	some non-synonymous	175	L	L (10)/V (1)
1970379	tar	1662	methyl-accepting chemotaxis protein II	AAC74956.1	A	A (10)/G (1)	all synonymous	113	L	L (11)
1971737	cheA	1965	fused chemotactic sensory histidine kinase in two-component regulatory system with CheB and CheY: sensory histidine kinase/signal sensing protein	AAC74958.1	G	G (10)/A (1)	some non-synonymous	538	R	R (10)/C (1)
1975992	flhD	351	DNA-binding transcriptional dual regulator with FlhC	AAC74962.2	T	A (10)/T (1)	some non-synonymous	77	Q	L (10)/Q (1)
1978216	otsA	1425	trehalose-6-phosphate synthase	AAC74966.1	G	A (9)/G (2)	some non-synonymous	474	A	V (9)/A (2)
1978268	otsA	1425	trehalose-6-phosphate synthase	AAC74966.1	G	G (10)/A (1)	some non-synonymous	457	R	R (10)/* (1)
1978405	otsA	1425	trehalose-6-phosphate synthase	AAC74966.1	G	A (6)/G (5)	some non-synonymous	411	A	V (6)/A (5)
1980701	araH	987	fused L-arabinose transporter subunits of ABC superfamily: membrane components	AAT48138.2	G	G (10)/T (1)	all synonymous	288	T	T (11)
1980912	araH	987	fused L-arabinose transporter subunits of ABC superfamily: membrane components	AAT48138.2	A	G (10)/A (1)	some non-synonymous	218	V	A (10)/V (1)
1981304	araH	987	fused L-arabinose transporter subunits of ABC superfamily: membrane components	AAT48138.2	A	A (6)/T (5)	some non-synonymous	87	C	C (6)/* (5)
1981394	araH	987	fused L-arabinose transporter subunits of ABC superfamily: membrane components	AAT48138.2	T	T (10)/A (1)	all synonymous	57	A	A (11)
1982535	araG	1515	fused L-arabinose transporter subunits of ABC superfamily: ATP-binding components	AAC74970.1	G	G (10)/A (1)	some non-synonymous	187	R	R (10)/C (1)
1984129	araF	990	L-arabinose transporter subunit	AAC74971.1	C	C (10)/T (1)	all synonymous	8	L	L (11)
1984988	ftnB	504	ferritin B, probable ferrous iron reservoir	AAC74972.1	A	A (10)/T (1)	some non-synonymous	14	M	M (10)/L (1)
1985574	yecJ	252	hypothetical protein	AAC74973.2	G	G (10)/T (1)	some non-synonymous	70	A	A (10)/E (1)
1990755	pgsA	549	phosphatidylglycerophosphate synthetase	AAC74979.1	G	A (10)/G (1)	all synonymous	29	T	T (11)
1994007	yecF	225	conserved protein, DUF2594 family	AAC74982.1	A	A (10)/C (1)	some non-synonymous	56	T	T (10)/P (1)
1994544	sdiA	723	quorum-sensing transcriptional activator	AAC74983.1	G	G (10)/A (1)	some non-synonymous	105	P	P (10)/S (1)
1996057	yecS	669	inner membrane protein, predicted transporter subunit: membrane component of ABC superfamily	AAC74985.1	C	G (10)/C (1)	all synonymous	149	L	L (11)
1997093	dcyD	987	D-cysteine desulfhydrase, PLP-dependent	AAC74986.2	G	G (10)/- (1)	some non-synonymous	138	Q	Q (10)/? (1)
2002717	fliD	1407	flagellar filament capping protein	AAC74991.1	G	G (10)/A (1)	all synonymous	274	A	A (11)
2008364	yedK	669	hypothetical protein	AAT48139.1	G	G (10)/A (1)	some non-synonymous	174	E	E (10)/K (1)
2011922	fliF	1659	flagellar basal-body MS-ring and collar protein	AAC75005.1	G	T (10)/G (1)	some non-synonymous	224	G	W (10)/G (1)
2015946	fliI	1374	flagellum-specific ATP synthase	AAC75008.1	T	T (10)/C (1)	some non-synonymous	457	S	S (10)/P (1)
2017291	fliK	1128	flagellar hook-length control protein	AAC75010.1	C	C (10)/A (1)	all synonymous	294	R	R (11)
2018440	fliM	1005	flagellar motor switching and energizing component	AAC75012.1	G	G (10)/A (1)	all synonymous	110	L	L (11)
2022273	rcsA	624	DNA-binding transcriptional activator, co-regulator with RcsB	AAC75018.1	T	T (10)/C (1)	all synonymous	94	Y	Y (11)
2025673	yedQ	1695	putative membrane-anchored diguanylate cyclase	AAC75022.2	A	G (10)/A (1)	all synonymous	123	T	T (11)
2026812	yedI	918	conserved inner membrane protein	AAC75024.1	T	G (6)/T (5)	all synonymous	193	V	V (11)
2029869	dcm	1419	DNA cytosine methyltransferase	AAC75027.1	G	G (10)/A (1)	some non-synonymous	158	A	A (10)/V (1)
2035011	yedV	1359	putative sensory kinase in two-component regulatory system with YedW	AAC75034.1	G	G (10)/A (1)	some non-synonymous	389	P	P (10)/L (1)
2038619	yedZ	636	inner membrane heme subunit for periplasmic YedYZ reductase	AAC75038.1	A	A (10)/C (1)	some non-synonymous	38	D	D (10)/A (1)
2040840	yodB	531	cytochrome b561 homolog	AAC75040.2	C	T (10)/C (1)	some non-synonymous	150	A	V (10)/A (1)
2053435	amn	1455	AMP nucleosidase	AAC75046.1	G	A (10)/G (1)	all synonymous	117	S	S (11)
2056577	yeeO	1488	putative multdrug exporter, MATE family	AAC75048.2	G	A (6)/G (5)	some non-synonymous	380	Q	* (6)/Q (5)
2056598[+1]	yeeO	1488	putative multdrug exporter, MATE family	AAC75048.2	-	- (10)/C (1)	some non-synonymous	373	V	V (1)/? (10)
2056649	yeeO	1488	putative multdrug exporter, MATE family	AAC75048.2	A	T (10)/A (1)	some non-synonymous	356	S	T (10)/S (1)
2057582	yeeO	1488	putative multdrug exporter, MATE family	AAC75048.2	G	A (10)/G (1)	some non-synonymous	45	L	F (10)/L (1)
2059454	nac	918	DNA-binding transcriptional dual regulator of nitrogen assimilation	AAC75050.1	C	C (10)/T (1)	all synonymous	168	L	L (11)
2063410	cobU	546	bifunctional cobinamide kinase/ cobinamide phosphate guanylyltransferase	AAC75054.1	G	G (10)/A (1)	some non-synonymous	127	P	P (10)/S (1)
2063490	cobU	546	bifunctional cobinamide kinase/ cobinamide phosphate guanylyltransferase	AAC75054.1	G	G (10)/- (1)	some non-synonymous	100	P	P (10)/? (1)
2087041	yeeZ	825	putative epimerase, with NAD(P)-binding Rossmann-fold domain	AAC75077.1	C	C (10)/T (1)	some non-synonymous	38	E	E (10)/K (1)
2092578	hisH	591	imidazole glycerol phosphate synthase, glutamine amidotransferase subunit with HisF	AAC75084.1	A	G (6)/A (5)	some non-synonymous	7	D	G (6)/D (5)
2095767	wzzB	981	regulator of length of O-antigen component of lipopolysaccharide chains	AAC75088.2	C	C (10)/T (1)	some non-synonymous	187	V	V (10)/I (1)
2095959	wzzB	981	regulator of length of O-antigen component of lipopolysaccharide chains	AAC75088.2	G	G (10)/A (1)	some non-synonymous	123	P	P (10)/S (1)
2098767	gnd	1407	6-phosphogluconate dehydrogenase, decarboxylating	AAC75090.1	C	C (10)/T (1)	some non-synonymous	176	D	D (10)/N (1)
2112022	wcaN	894	putative regulatory subunit for GalU	AAC75103.1	T	T (10)/C (1)	all synonymous	110	L	L (11)
2113076	wcaM	1395	colanic acid biosynthesis protein	AAC75104.1	G	T (10)/G (1)	some non-synonymous	282	P	Q (10)/P (1)
2113836	wcaM	1395	colanic acid biosynthesis protein	AAC75104.1	G	G (10)/A (1)	some non-synonymous	29	L	L (10)/F (1)
2114848	wcaL	1221	putative glycosyl transferase	AAC75105.1	G	A (10)/G (1)	some non-synonymous	102	R	W (10)/R (1)
2114935	wcaL	1221	putative glycosyl transferase	AAC75105.1	G	G (10)/T (1)	some non-synonymous	73	R	R (10)/S (1)
2115371	wcaK	1281	colanic acid biosynthesis protein	AAC75106.1	T	T (10)/C (1)	some non-synonymous	353	N	N (10)/S (1)
2118316	wcaJ	1395	colanic biosynthesis UDP-glucose lipid carrier transferase	AAC75108.1	G	G (10)/C (1)	all synonymous	421	T	T (11)
2118931	wcaJ	1395	colanic biosynthesis UDP-glucose lipid carrier transferase	AAC75108.1	G	G (10)/A (1)	all synonymous	216	D	D (11)
2122595	wcaI	1224	putative glycosyl transferase	AAC75111.1	G	G (10)/A (1)	all synonymous	392	L	L (11)
2122768	wcaI	1224	putative glycosyl transferase	AAC75111.1	C	C (10)/A (1)	some non-synonymous	335	A	A (10)/S (1)
2123074	wcaI	1224	putative glycosyl transferase	AAC75111.1	T	T (10)/- (1)	some non-synonymous	233	I	I (10)/? (1)
2123656	wcaI	1224	putative glycosyl transferase	AAC75111.1	T	T (10)/A (1)	some non-synonymous	39	T	T (10)/S (1)
2125238	gmd	1122	GDP-D-mannose dehydratase, NAD(P)-binding	AAC75114.1	C	C (10)/T (1)	all synonymous	367	V	V (11)
2125398	gmd	1122	GDP-D-mannose dehydratase, NAD(P)-binding	AAC75114.1	G	G (10)/A (1)	some non-synonymous	314	P	P (10)/L (1)
2126680	wcaF	549	putative acyl transferase	AAC75115.1	G	A (10)/G (1)	some non-synonymous	78	A	V (10)/A (1)
2126995	wcaE	747	putative glycosyl transferase	AAC75116.1	G	G (10)/A (1)	some non-synonymous	227	A	A (10)/V (1)
2129761	wcaC	1218	putative glycosyl transferase	AAC75118.1	T	T (10)/C (1)	some non-synonymous	112	S	S (10)/G (1)
2131199	wcaA	840	putative glycosyl transferase	AAC75120.1	C	C (10)/T (1)	some non-synonymous	75	A	A (10)/T (1)
2133234	wzc	2163	protein-tyrosine kinase	AAC75121.2	G	T (10)/G (1)	some non-synonymous	148	A	E (10)/A (1)
2134329	wza	1140	lipoprotein required for capsular polysaccharide translocation through the outer membrane	AAC75123.1	C	T (10)/C (1)	all synonymous	313	K	K (11)
2135043	wza	1140	lipoprotein required for capsular polysaccharide translocation through the outer membrane	AAC75123.1	C	C (10)/A (1)	all synonymous	75	T	T (11)
2137210	yegH	1584	inner membrane protein	AAC75124.2	G	G (10)/T (1)	some non-synonymous	429	V	V (10)/L (1)
2138045	asmA	1854	putative assembly protein	AAC75125.1	T	T (10)/G (1)	some non-synonymous	531	D	D (10)/A (1)
2139258	asmA	1854	putative assembly protein	AAC75125.1	C	C (10)/T (1)	some non-synonymous	127	V	V (10)/I (1)
2146590	yegD	1353	putative chaperone	AAC75130.2	G	G (10)/A (1)	some non-synonymous	298	S	S (10)/N (1)
2150003	yegK	762	hypothetical protein	AAC75133.1	G	A (10)/G (1)	some non-synonymous	165	A	V (10)/A (1)
2150191	yegK	762	hypothetical protein	AAC75133.1	G	A (10)/G (1)	all synonymous	102	A	A (11)
2152084	mdtA	1248	multidrug efflux system, subunit A	AAC75135.2	G	A (9)/G (2)	all synonymous	15	V	V (11)
2153095	mdtA	1248	multidrug efflux system, subunit A	AAC75135.2	G	G (10)/A (1)	all synonymous	352	V	V (11)
2154340	mdtB	3123	multidrug efflux system, subunit B	AAC75136.1	G	G (10)/A (1)	some non-synonymous	352	A	A (10)/T (1)
2156861	mdtC	3078	multidrug efflux system, subunit C	AAC75137.1	A	A (10)/T (1)	some non-synonymous	151	Q	Q (10)/L (1)
2157814	mdtC	3078	multidrug efflux system, subunit C	AAC75137.1	G	G (10)/A (1)	some non-synonymous	469	V	V (10)/I (1)
2159464	mdtC	3078	multidrug efflux system, subunit C	AAC75137.1	C	T (10)/C (1)	some non-synonymous	1019	P	S (10)/P (1)
2160076	mdtD	1416	putative arabinose efflux transporter	AAC75138.1	C	C (10)/T (1)	some non-synonymous	197	L	L (10)/F (1)
2160171	mdtD	1416	putative arabinose efflux transporter	AAC75138.1	A	T (10)/G (1)	all synonymous	228	A	A (11)
2160542	mdtD	1416	putative arabinose efflux transporter	AAC75138.1	G	G (10)/C (1)	some non-synonymous	352	W	W (10)/S (1)
2162674	baeR	723	DNA-binding response regulator in two-component regulatory system with BaeS	AAC75140.1	G	G (10)/A (1)	all synonymous	125	L	L (11)
2163301	yegP	333	conserved protein, UPF0339 family	AAC75141.2	G	G (10)/T (1)	some non-synonymous	30	S	S (10)/I (1)
2172018	gatC	1356	galactitol-specific enzyme IIC component of PTS	AAC75153.1	T	T (10)/C (1)	some non-synonymous	95	I	I (10)/V (1)
2172452	gatB	285	galactitol-specific enzyme IIB component of PTS	AAC75154.1	G	G (10)/A (1)	some non-synonymous	46	T	T (10)/I (1)
2173408	gatZ	1263	D-tagatose 1,6-bisphosphate aldolase 2, subunit	AAC75156.1	C	C (10)/T (1)	all synonymous	312	L	L (11)
2176395	fbaB	1053	fructose-bisphosphate aldolase class I	AAC75158.2	G	G (10)/A (1)	all synonymous	64	G	G (11)
2177299	yegT	1278	nucleoside transporter, low affinity	AAC75159.1	G	G (10)/T (1)	some non-synonymous	153	G	G (10)/W (1)
2177561	yegT	1278	nucleoside transporter, low affinity	AAC75159.1	G	G (10)/A (1)	some non-synonymous	240	G	G (10)/D (1)
2181460	yegX	819	putative hydrolase	AAC75163.2	C	C (10)/T (1)	some non-synonymous	72	V	V (10)/I (1)
2181495	yegX	819	putative hydrolase	AAC75163.2	C	T (10)/C (1)	some non-synonymous	60	R	H (10)/R (1)
2181802	thiD	801	bifunctional hydroxy-methylpyrimidine kinase/ hydroxy-phosphomethylpyrimidine kinase	AAC75164.1	T	T (10)/A (1)	some non-synonymous	246	Q	Q (10)/L (1)
2183060	thiM	789	hydoxyethylthiazole kinase	AAC75165.1	T	T (9)/A (2)	some non-synonymous	88	Q	Q (9)/H (2)
2185127	rcnB	339	periplasmic modulator of Ni and Co efflux	AAC75168.2	T	A (10)/T (1)	some non-synonymous	49	F	Y (10)/F (1)
2192843	metG	2034	methionyl-tRNA synthetase	AAC75175.1	G	G (10)/A (1)	all synonymous	174	P	P (11)
2198480	yehI	3633	hypothetical protein	AAC75179.1	T	C (10)/A (1)	all synonymous	60	I	I (11)
2200849	yehI	3633	hypothetical protein	AAC75179.1	A	- (10)/A (1)	some non-synonymous	850	Q	Q (1)/? (10)
2200850	yehI	3633	hypothetical protein	AAC75179.1	A	- (10)/A (1)	some non-synonymous	850	Q	Q (1)/? (10)
2200851	yehI	3633	hypothetical protein	AAC75179.1	G	- (10)/G (1)	some non-synonymous	851	E	E (1)/? (10)
2201747	yehI	3633	hypothetical protein	AAC75179.1	C	C (10)/T (1)	all synonymous	1149	N	N (11)
2209562	yehR	462	lipoprotein, DUF1307 family	AAC75184.2	G	G (10)/A (1)	some non-synonymous	106	V	V (10)/M (1)
2213854	yehW	732	putative transporter subunit: membrane component of ABC superfamily	AAC75189.1	C	C (10)/T (1)	all synonymous	215	Q	Q (11)
2214354	yehW	732	putative transporter subunit: membrane component of ABC superfamily	AAC75189.1	G	A (10)/G (1)	all synonymous	49	L	L (11)
2216034	yehY	1158	putative transporter subunit: membrane component of ABC superfamily	AAC75191.1	C	C (6)/G (5)	all synonymous	182	T	T (11)
2216240	yehY	1158	putative transporter subunit: membrane component of ABC superfamily	AAC75191.1	G	A (10)/G (1)	all synonymous	114	L	L (11)
2216821	osmF	918	putative transporter subunit: periplasmic-binding component of ABC superfamily	AAC75192.1	A	T (10)/A (1)	some non-synonymous	228	L	Q (10)/L (1)
2217444	osmF	918	putative transporter subunit: periplasmic-binding component of ABC superfamily	AAC75192.1	C	C (10)/T (1)	all synonymous	20	P	P (11)
2221343	dld	1716	D-lactate dehydrogenase, FAD-binding, NADH independent	AAC75194.1	G	G (10)/T (1)	all synonymous	379	P	P (11)
2221707	dld	1716	D-lactate dehydrogenase, FAD-binding, NADH independent	AAC75194.1	G	G (10)/A (1)	some non-synonymous	501	V	V (10)/M (1)
2222077	pbpG	933	D-alanyl-D-alanine endopeptidase	AAC75195.2	G	G (10)/A (1)	all synonymous	272	R	R (11)
2223355	yohC	588	inner membrane protein, Yip1 family	AAC75196.2	C	C (10)/A (1)	some non-synonymous	100	R	R (10)/L (1)
2223421	yohC	588	inner membrane protein, Yip1 family	AAC75196.2	A	A (10)/T (1)	some non-synonymous	78	V	V (10)/D (1)
2223488	yohC	588	inner membrane protein, Yip1 family	AAC75196.2	C	C (10)/A (1)	some non-synonymous	56	G	G (10)/C (1)
2224633	yohF	762	putative oxidoreductase with NAD(P)-binding Rossmann-fold domain	AAC75198.1	C	C (10)/T (1)	all synonymous	220	L	L (11)
2227621	dusC	948	tRNA-dihydrouridine synthase C	AAC75201.1	C	C (10)/T (1)	some non-synonymous	263	G	G (10)/S (1)
2234780	mglC	1011	methyl-galactoside transporter subunit	AAC75209.1	G	G (10)/A (1)	all synonymous	332	Y	Y (11)
2236162	mglA	1521	fused methyl-galactoside transporter subunits of ABC superfamily: ATP-binding components	AAC75210.1	T	T (10)/G (1)	some non-synonymous	384	S	S (10)/R (1)
2237018	mglA	1521	fused methyl-galactoside transporter subunits of ABC superfamily: ATP-binding components	AAC75210.1	G	G (10)/A (1)	all synonymous	98	N	N (11)
2240951	yeiB	1158	putative inner membrane protein	AAC75213.1	G	A (8)/G (3)	all synonymous	13	V	V (11)
2243041	cirA	1992	catecholate siderophore receptor CirA	AAC75216.1	A	A (10)/C (1)	some non-synonymous	584	L	L (10)/R (1)
2243380	cirA	1992	catecholate siderophore receptor CirA	AAC75216.1	A	A (10)/C (1)	some non-synonymous	471	V	V (10)/G (1)
2243879	cirA	1992	catecholate siderophore receptor CirA	AAC75216.1	C	C (10)/T (1)	some non-synonymous	305	G	G (10)/S (1)
2248102	yeiH	1050	inner membrane protein, UPF0324 family	AAC75219.1	C	C (10)/T (1)	all synonymous	122	L	L (11)
2252640	rihB	942	ribonucleoside hydrolase 2	AAC75223.1	T	T (10)/G (1)	some non-synonymous	190	D	D (10)/A (1)
2257129	psuK	942	pseudouridine kinase	AAC75227.1	C	C (10)/T (1)	some non-synonymous	64	G	G (10)/S (1)
2257206	psuK	942	pseudouridine kinase	AAC75227.1	G	G (10)/C (1)	some non-synonymous	38	T	T (10)/R (1)
2268014	spr	567	mutational suppressor of prc thermosensitivity, outer membrane lipoprotein	AAC75236.1	A	A (10)/G (1)	some non-synonymous	5	Q	Q (10)/R (1)
2268807	rtn	1557	resistance protein for phages lambda and N4, when overexpressed, predicted membrane-anchored cyclic-di-GMP phosphodiesterase	AAC75237.1	C	C (10)/T (1)	all synonymous	20	G	G (11)
2269033	rtn	1557	resistance protein for phages lambda and N4, when overexpressed, predicted membrane-anchored cyclic-di-GMP phosphodiesterase	AAC75237.1	T	T (10)/- (1)	some non-synonymous	96	F	F (10)/? (1)
2269914	rtn	1557	resistance protein for phages lambda and N4, when overexpressed, predicted membrane-anchored cyclic-di-GMP phosphodiesterase	AAC75237.1	C	C (10)/- (1)	some non-synonymous	389	T	T (10)/? (1)
2269915	rtn	1557	resistance protein for phages lambda and N4, when overexpressed, predicted membrane-anchored cyclic-di-GMP phosphodiesterase	AAC75237.1	G	G (10)/- (1)	some non-synonymous	390	E	E (10)/? (1)
2269916	rtn	1557	resistance protein for phages lambda and N4, when overexpressed, predicted membrane-anchored cyclic-di-GMP phosphodiesterase	AAC75237.1	A	A (10)/- (1)	some non-synonymous	390	E	E (10)/? (1)
2269917	rtn	1557	resistance protein for phages lambda and N4, when overexpressed, predicted membrane-anchored cyclic-di-GMP phosphodiesterase	AAC75237.1	G	G (10)/- (1)	some non-synonymous	390	E	E (10)/? (1)
2269918	rtn	1557	resistance protein for phages lambda and N4, when overexpressed, predicted membrane-anchored cyclic-di-GMP phosphodiesterase	AAC75237.1	C	C (10)/- (1)	some non-synonymous	391	R	R (10)/? (1)
2269919	rtn	1557	resistance protein for phages lambda and N4, when overexpressed, predicted membrane-anchored cyclic-di-GMP phosphodiesterase	AAC75237.1	G	G (10)/- (1)	some non-synonymous	391	R	R (10)/? (1)
2270466	yejA	1815	microcin C transporter YejABEF, periplasmic binding protein; ABC family	AAC75238.2	C	C (10)/T (1)	all synonymous	27	A	A (11)
2270736	yejA	1815	microcin C transporter YejABEF, periplasmic binding protein; ABC family	AAC75238.2	C	C (10)/T (1)	all synonymous	117	V	V (11)
2270748	yejA	1815	microcin C transporter YejABEF, periplasmic binding protein; ABC family	AAC75238.2	G	T (10)/G (1)	all synonymous	121	P	P (11)
2271854	yejA	1815	microcin C transporter YejABEF, periplasmic binding protein; ABC family	AAC75238.2	C	C (10)/A (1)	some non-synonymous	490	P	P (10)/Q (1)
2272005	yejA	1815	microcin C transporter YejABEF, periplasmic binding protein; ABC family	AAC75238.2	G	G (6)/A (5)	all synonymous	540	G	G (11)
2273055	yejB	1095	microcin C transporter YejABEF, permease subunit; ABC family	AAC75239.1	G	G (10)/A (1)	all synonymous	285	L	L (11)
2273533	yejE	1026	microcin C transporter YejABEF, permease subunit; ABC family	AAC75240.1	A	A (10)/C (1)	some non-synonymous	80	D	D (10)/A (1)
2276064	yejG	345	hypothetical protein	AAC75242.1	T	C (10)/T (1)	some non-synonymous	66	S	G (10)/S (1)
2276994	bcr	1191	bicyclomycin/cysteine/sulfonamide efflux transporter	AAC75243.1	G	G (10)/C (1)	some non-synonymous	263	F	F (10)/L (1)
2280688	rplY	285	50S ribosomal subunit protein L25	AAC75246.1	G	T (10)/G (1)	some non-synonymous	50	M	I (10)/M (1)
2281508	yejK	1008	spermidine nucleoid-associated protein	AAC75247.1	T	T (10)/A (1)	some non-synonymous	154	L	L (10)/F (1)
2281613	yejK	1008	spermidine nucleoid-associated protein	AAC75247.1	T	T (10)/A (1)	all synonymous	119	A	A (11)
2283339	yejM	1761	putative hydrolase, inner membrane	AAC75249.1	G	G (10)/A (1)	all synonymous	314	S	S (11)
2283786	yejM	1761	putative hydrolase, inner membrane	AAC75249.1	C	C (10)/T (1)	all synonymous	463	D	D (11)
2293118	ccmE	480	periplasmic heme chaperone	AAC75257.1	G	G (10)/A (1)	all synonymous	95	Y	Y (11)
2293670	ccmC	738	heme exporter subunit	AAC75259.1	T	T (10)/G (1)	some non-synonymous	225	I	I (10)/L (1)
2295130	ccmA	624	heme exporter subunit	AAC75261.2	C	C (10)/- (1)	some non-synonymous	179	G	G (10)/? (1)
2296028	napC	603	quinol dehydrogenase, electron source for NapAB	AAC75262.1	G	G (10)/A (1)	some non-synonymous	85	A	A (10)/V (1)
2296945	napH	864	ferredoxin-type protein essential for electron transfer from ubiquinol to periplasmic nitrate reductase (NapAB)	AAC75264.1	G	G (10)/A (1)	some non-synonymous	219	A	A (10)/V (1)
2297331	napH	864	ferredoxin-type protein essential for electron transfer from ubiquinol to periplasmic nitrate reductase (NapAB)	AAC75264.1	C	C (10)/A (1)	all synonymous	90	V	V (11)
2297439	napH	864	ferredoxin-type protein essential for electron transfer from ubiquinol to periplasmic nitrate reductase (NapAB)	AAC75264.1	G	A (10)/G (1)	all synonymous	54	Y	Y (11)
2298816	napA	2487	nitrate reductase, periplasmic, large subunit	AAC75266.1	G	G (10)/A (1)	some non-synonymous	654	R	R (10)/C (1)
2299825	napA	2487	nitrate reductase, periplasmic, large subunit	AAC75266.1	A	A (10)/C (1)	all synonymous	317	G	G (11)
2300029	napA	2487	nitrate reductase, periplasmic, large subunit	AAC75266.1	G	G (10)/A (1)	all synonymous	249	S	S (11)
2303287	mqo	1647	malate dehydrogenase, FAD/NAD(P)-binding domain	AAC75270.1	T	T (10)/C (1)	some non-synonymous	497	K	K (10)/R (1)
2305158	yojI	1644	microcin J25 efflux pump, TolC-dependent; fused ABC transporter permease and ATP-binding components	AAC75271.1	G	A (8)/G (3)	some non-synonymous	494	P	S (8)/P (3)
2307993	ada	1065	fused DNA-binding transcriptional dual regulator/O6-methylguanine-DNA methyltransferase	AAC75273.1	C	C (10)/A (1)	all synonymous	145	A	A (11)
2308974	apbE	1056	putative thiamine biosynthesis lipoprotein	AAC75274.1	A	G (10)/A (1)	all synonymous	195	L	L (11)
2314564	rcsB	651	DNA-binding response regulator in two-component regulatory system with RcsC and YojN	AAC75277.1	G	G (10)/T (1)	all synonymous	122	A	A (11)
[truncated: 1,789 more rows]

## Sheet: ST4-3 TT12A_Chromosomal_InDels
I. SNPs and InDels Polymorphism in TT12A in comparison to B
[truncated: 54 more rows]

[truncated: 1 more sheets: ST4-4 Plasmid_SNPs_InDels]
